# Supplementary material
Source: HighWire-hosted journal article supplement (doi:10.1101/rna.073247.119)
Supplement: Supplemental_Table_S3.xlsx [file Supplemental_Table_S3.xlsx]

## Sheet: PolyadenylationIncreases
Transcript	Name.x	noPG1_meanPolyA	PG901_meanPolyA	MI1_meanPolyA	Inter1_meanPolyA	MII1_meanPolyA	max.x	noPGnorm.x	PG90norm.x	MInorm.x	Internorm.x	MIInorm.x	Name.y	noPG2_meanPolyA	PG902_meanPolyA	MI2_meanPolyA	Inter2_meanPolyA	MII2_meanPolyA	max.y	noPGnorm.y	PG90norm.y	MInorm.y	Internorm.y	MIInorm.y
Xelaev18000034m.g	GPKOW.L	38.979	41.8778	86.8561	74.594	73.3692	86.8561	0.448776	0.482151	1	0.858822	0.844721	gpkow.L	40.3321	45.332	75.4623	68.7197	56.3822	75.4623	0.534467	0.600724	1	0.910649	0.747157
Xelaev18000139m.g	DCAF12.L	27.475	37.0119	68.1524	66.6462	68.3012	68.3012	0.402262	0.541892	0.997821	0.975768	1	dcaf12.L	37.859	34.1013	65.0119	59.806	70.2243	70.2243	0.539115	0.485605	0.925775	0.851642	1
Xelaev18000460m.g	XELAEV18000460M.G	18.5513	19.4776	28.489	26.8126	34.6372	34.6372	0.53559	0.562333	0.822497	0.7741	1	Xelaev18000460m.g	20.0419	20.1173	29.1654	34.2596	50.288	50.288	0.398543	0.400042	0.579967	0.681268	1
Xelaev18000502m.g	LOC100493862-LIKE.1	18.6748	18.8676	30.6207	30.8571	40.5248	40.5248	0.460826	0.465582	0.755605	0.761439	1	loc100493862-like.1	25.05	15.3719	24.2386	41.8611	21.8209	41.8611	0.598407	0.367212	0.579025	1	0.521269
Xelaev18000723m.g	XELAEV18000723M.G	22.8901	22.9916	85.9122	87.6099	94.6731	94.6731	0.241781	0.242852	0.907461	0.925394	1	Xelaev18000723m.g	38.8505	22.345	83.9597	91.9063	92.4349	92.4349	0.420301	0.241737	0.908311	0.994281	1
Xelaev18000726m.g	XELAEV18000726M.G	18.156	18.7492	33.2661	35.9653	42.7467	42.7467	0.424734	0.438611	0.778213	0.841358	1	Xelaev18000726m.g	18.1114	18.3774	26.3582	33.6131	40.5217	40.5217	0.446955	0.453521	0.65047	0.829509	1
Xelaev18000735m.g	QTRT1.S	20.03	23.3008	71.1758	65.0207	65.1185	71.1758	0.281416	0.32737	1	0.913523	0.914897	qtrt1.S	33.134	26.9659	47.9777	57.0466	54.3767	57.0466	0.580823	0.472699	0.841025	1	0.953197
Xelaev18000807m.g	IER2.S	25.9414	29.2947	48.8156	43.6232	51.9515	51.9515	0.499339	0.563887	0.939638	0.839691	1	ier2.S	30.3144	24.5814	50.2	48.9669	58.3387	58.3387	0.519627	0.421356	0.860492	0.839355	1
Xelaev18001054m.g	XELAEV18001054M.G	37.5825	36.3898	82.4336	64.0863	67.3049	82.4336	0.455913	0.441444	1	0.777429	0.816474	Xelaev18001054m.g	50.6308	37.1215	73.283	73.9519	60.6389	73.9519	0.684644	0.501968	0.990955	1	0.819977
Xelaev18001080m.g	CTDNEP1.S	33.0292	36.0216	74.3917	61.2711	73.7562	74.3917	0.44399	0.484215	1	0.823629	0.991458	ctdnep1.S	34.0959	32.9441	61.7143	59.5612	54.0297	61.7143	0.55248	0.533816	1	0.965112	0.875481
Xelaev18001082m.g	CLDN7.S	45.6353	50.6643	112.065	106.995	111.645	112.065	0.407222	0.452098	1	0.954762	0.996251	cldn7.S	68.3656	60.4464	110.371	116.203	112.38	116.203	0.58833	0.52018	0.94981	1	0.967104
Xelaev18001137m.g	GNA11.S	22.3191	24.4494	55.8849	58.3614	69.9952	69.9952	0.318866	0.349301	0.798411	0.833792	1	gna11.S	59.6378	25.1165	54.3969	57.8505	66.6405	66.6405	0.894918	0.376896	0.816274	0.868098	1
Xelaev18001330m.g	SLX1A.L	37.5704	42.6849	83.3248	77.462	83.0192	83.3248	0.450891	0.512271	1	0.929639	0.996333	slx1a.L	46.1481	42.1219	95.3874	113.477	81.8038	113.477	0.406673	0.371192	0.840586	1	0.720883
Xelaev18001349m.g	PAGR1.L	24.7444	27.7402	54.6113	57.4258	64.8092	64.8092	0.381804	0.428028	0.842647	0.886075	1	pagr1.L	39.1644	30.3989	70.0971	71.7784	71.4168	71.7784	0.545629	0.423511	0.976576	1	0.994963
Xelaev18001350m.g	KIF22.L	22.4161	26.7765	103.089	98.1907	110.873	110.873	0.202177	0.241506	0.929792	0.88561	1	kif22.L	52.1793	30.9536	106.065	100.037	108.161	108.161	0.482424	0.286182	0.980627	0.924889	1
Xelaev18001362m.g	XELAEV18001362M.G	25.7124	25.9	87.1302	82.3103	76.0583	87.1302	0.295103	0.297256	1	0.944682	0.872927	Xelaev18001362m.g	26.2877	29.7286	58.4921	70.8169	62.6933	70.8169	0.371206	0.419795	0.825962	1	0.885288
Xelaev18001415m.g	XELAEV18001415M.G	18.8281	19.6422	27.1051	27.0447	34.7407	34.7407	0.541961	0.565396	0.780213	0.778475	1	Xelaev18001415m.g	20.1356	21.6617	29.5726	36.6007	48.3017	48.3017	0.416872	0.448467	0.612247	0.757751	1
Xelaev18001416m.g	XELAEV18001416M.G	20.399	20.3256	30.2649	31.7318	36.0905	36.0905	0.565219	0.563185	0.838584	0.87923	1	Xelaev18001416m.g	21.7314	23.8322	33.624	36.3117	55.3433	55.3433	0.392665	0.430625	0.607554	0.656117	1
Xelaev18001483m.g	DPPA2/4.1.L	41.9885	43.724	95.7734	102.246	103.218	103.218	0.406795	0.423609	0.927876	0.990583	1	dppa2/4.1.L	72.92	46.4595	96.726	104.313	103.156	104.313	0.699049	0.445385	0.927266	1	0.988907
Xelaev18001533m.g	KAT8.L	39.522	42.0142	89.2917	84.8538	89.3979	89.3979	0.442091	0.469968	0.998812	0.94917	1	kat8.L	53.9917	43.143	81.3935	86.0461	84.63	86.0461	0.627474	0.501394	0.94593	1	0.983543
Xelaev18001781m.g	FAM208A.L	19.3151	23.4265	56.8704	32.9884	35.9792	56.8704	0.339633	0.411928	1	0.580063	0.632652	fam208a.L	25.0533	26.8092	40.25	41.7692	27.4884	41.7692	0.599804	0.641841	0.963628	1	0.658101
Xelaev18002195m.g	ATXN2L.S	27.046	36.6702	85.9228	78.1973	85.4505	85.9228	0.314771	0.426781	1	0.910088	0.994503	atxn2l.S	45.3308	31.7273	87.7017	88.0622	80.3019	88.0622	0.514759	0.360283	0.995906	1	0.911877
Xelaev18002272m.g	KIF22.S	22.5609	23.4251	94.0684	93.857	100.923	100.923	0.223545	0.232108	0.932078	0.929983	1	kif22.S	38.2807	28.3636	77.626	86.4407	76.82	86.4407	0.442855	0.328128	0.898026	1	0.888702
Xelaev18002294m.g	XELAEV18002294M.G	19.5108	19.6693	30.7649	26.1992	41.7222	41.7222	0.467636	0.471435	0.737375	0.627942	1	Xelaev18002294m.g	24.2832	25.1515	39.1179	39.1928	58.2941	58.2941	0.416564	0.431458	0.671044	0.672329	1
Xelaev18002295m.g	XELAEV18002295M.G	18.2938	18.9674	26.6891	26.0702	31.1976	31.1976	0.586386	0.607977	0.855487	0.835647	1	Xelaev18002295m.g	19.3463	19.45	27.9292	34.0895	47.5334	47.5334	0.407005	0.409186	0.587569	0.717168	1
Xelaev18002360m.g	UNNAMED	28.8158	28.9882	77.4751	69.0442	66.1811	77.4751	0.371937	0.374161	1	0.891179	0.854224	unnamed	52.6281	44.4982	72.587	65.8006	57.5445	72.587	0.725034	0.613032	1	0.906506	0.792766
Xelaev18002400m.g	THA1P.L	18.556	19.4029	32.0374	38.347	38.34	38.347	0.483898	0.505981	0.835459	1	0.999817	tha1p.L	18.5046	16.9529	39.1105	33.753	45.458	45.458	0.40707	0.372935	0.860367	0.742509	1
Xelaev18002401m.g	BIRC5.2.L	18.434	19.1905	33.412	40.1878	40.2036	40.2036	0.458517	0.477333	0.831071	0.999609	1	birc5.2.L	18.8004	17.0842	38.6252	34.6947	45.4428	45.4428	0.413716	0.375949	0.849973	0.76348	1
Xelaev18002537m.g	XELAEV18002537M.G	22.1314	24.8308	57.1207	52.2542	57.2371	57.2371	0.386662	0.433823	0.997965	0.912942	1	Xelaev18002537m.g	24.5947	26.5926	53.5651	57.7004	50.5642	57.7004	0.426248	0.460874	0.928332	1	0.876323
Xelaev18002632m.g	XELAEV18002632M.G	17.6089	18.1274	35.883	29.7906	37.2376	37.2376	0.472879	0.486804	0.963622	0.800013	1	Xelaev18002632m.g	18.1963	18.0972	32.5538	40.6357	42.5131	42.5131	0.428016	0.425686	0.765737	0.955839	1
Xelaev18003039m.g	FAM208A.S	20.3742	21.875	63.9609	50.4747	54.7348	63.9609	0.318542	0.342006	1	0.789149	0.855754	fam208a.S	22.7542	21.3382	49.3023	48.2385	43.6322	49.3023	0.461525	0.432804	1	0.978422	0.884992
Xelaev18003845m.g	MSANTD3.S	24.1492	21.9681	43.0658	32.3922	44.9783	44.9783	0.536908	0.488416	0.95748	0.720174	1	msantd3.S	19.2148	26.7248	45.5913	56.3596	29.1076	56.3596	0.340932	0.474185	0.808937	1	0.516463
Xelaev18003900m.g	XELAEV18003900M.G	21.2059	25.4134	46.4596	49.3391	50.336	50.336	0.421287	0.504874	0.922988	0.980194	1	Xelaev18003900m.g	25.0138	28.4	61.5766	54.5564	44.8056	61.5766	0.406222	0.461214	1	0.885992	0.727639
Xelaev18004051m.g	AZIN2.S	32.0524	35.8989	96.9638	75.357	77.2204	96.9638	0.330561	0.37023	1	0.777166	0.796383	azin2.S	49.9496	40.0873	80.8964	91.4056	69.4936	91.4056	0.546461	0.438565	0.885026	1	0.760278
Xelaev18004608m.g	FAM221A.L	40.9723	43.5593	80.9965	74.6799	75.8841	80.9965	0.505853	0.537792	1	0.922013	0.936881	fam221a.L	46.4978	53.0886	95.6854	89.3816	79.846	95.6854	0.485944	0.554824	1	0.93412	0.834463
Xelaev18004674m.g	TP53INP2.S	19.3778	19.9076	33.4695	48.1022	46.2236	48.1022	0.402846	0.413862	0.6958	1	0.960947	tp53inp2.S	26.114	21.8132	34.375	39.0442	46.8503	46.8503	0.557392	0.465594	0.733719	0.833382	1
Xelaev18004913m.g	NOT.L	16.3647	15.287	34.4935	37.8504	42.2647	42.2647	0.387196	0.361697	0.81613	0.895556	1	not.L	17.5615	16.9297	22.9867	26.5075	31.8641	31.8641	0.551139	0.531311	0.721398	0.831892	1
Xelaev18005024m.g	SLBP.L	19.9875	32.0288	60.2174	56.7037	62.0606	62.0606	0.322064	0.51609	0.9703	0.913683	1	slbp.L	49.1344	29.6929	61.1218	70.3837	68.9536	70.3837	0.698093	0.421871	0.868409	1	0.979681
Xelaev18005031m.g	XELAEV18005031M.G	32.7848	45.0897	91.2115	72.9459	87.5789	91.2115	0.359437	0.494343	1	0.799745	0.960174	Xelaev18005031m.g	33.7258	51.1415	100.825	100.626	52.7123	100.825	0.334498	0.507229	1	0.998026	0.522809
Xelaev18005051m.g	TNIP2.L	31.0462	31.7573	66.5424	61.0752	57.9474	66.5424	0.466564	0.477249	1	0.91784	0.870834	tnip2.L	31.9688	38.3074	65.2014	65.1489	49.1099	65.2014	0.490308	0.587524	1	0.999196	0.753203
Xelaev18005529m.g	ANAPC10.L	18.1549	17.2111	45.0709	34.6975	36.9757	45.0709	0.402809	0.381867	1	0.769843	0.820391	anapc10.L	22.0155	21.0503	46.4434	35.2826	28.5302	46.4434	0.474028	0.453246	1	0.759691	0.6143
Xelaev18005595m.g	PLK4.L	29.7313	27.6486	54.4737	51.845	60.1915	60.1915	0.493946	0.459345	0.905006	0.861334	1	plk4.L	34.1238	28.275	62.5694	51.0331	44.9916	62.5694	0.545375	0.451898	1	0.815624	0.719067
Xelaev18005714m.g	LOC100485357.L	28.25	28.1504	50.2754	40.9535	39.3514	50.2754	0.561905	0.559924	1	0.814584	0.782716	loc100485357.L	31.6949	29.7742	68.2	59.1923	55.8429	68.2	0.464735	0.436572	1	0.867922	0.81881
Xelaev18006011m.g	METTL14.L	31.5628	32.7025	66.8822	64.5211	79.03	79.03	0.399378	0.413799	0.846289	0.816413	1	mettl14.L	48.3139	33.8039	80.2782	89.0679	78.3035	89.0679	0.542439	0.379529	0.901314	1	0.879144
Xelaev18006348m.g	CSNK1G2.L	23.5087	24.2563	47.7409	56.373	64.983	64.983	0.361767	0.373272	0.734668	0.867504	1	csnk1g2.L	34.1458	22.4205	40.4951	32.2736	36.9172	40.4951	0.843208	0.553659	1	0.796975	0.911647
Xelaev18006386m.g	FAM32A.L	26.2255	27.3995	58.3547	58.008	62.0945	62.0945	0.422349	0.441255	0.939773	0.93419	1	fam32a.L	28.1291	28.0192	47.7149	47.5949	59.0602	59.0602	0.476278	0.474418	0.807902	0.805871	1
Xelaev18006616m.g	MAU2.L	24.5077	24.1509	46.2348	46.4671	52.2946	52.2946	0.468646	0.461824	0.884122	0.888563	1	mau2.L	25.1011	30.8478	51.7752	47.883	47.8713	51.7752	0.48481	0.595803	1	0.924825	0.924599
Xelaev18006851m.g	KANK1.L	24.9636	27.3391	76.9352	63.4208	62.163	76.9352	0.324476	0.355352	1	0.824341	0.807992	kank1.L	28.8314	32.4203	59.2708	55.1855	66.8265	66.8265	0.431436	0.485141	0.886936	0.825802	1
Xelaev18006890m.g	ZFAND5.L	32.8045	32.113	53.7222	52.2069	63.6941	63.6941	0.515032	0.504176	0.843441	0.81965	1	zfand5.L	34.8261	27.9072	37.0185	53.2875	62.9683	62.9683	0.553074	0.443195	0.587892	0.84626	1
Xelaev18006919m.g	GNAQ.L	26.746	21.8824	48.6833	47.1	41.3398	48.6833	0.549388	0.449483	1	0.967477	0.849157	gnaq.L	26.4182	19.7342	43.5426	41.7143	37.1778	43.5426	0.606721	0.453216	1	0.958012	0.853826
Xelaev18006948m.g	DAPK1.L	22.0737	24.7093	56.0175	62.4133	73.9945	73.9945	0.298315	0.333934	0.75705	0.843486	1	dapk1.L	53.4833	23.2615	70.0804	87.0441	83.2275	87.0441	0.61444	0.267238	0.805114	1	0.956154
Xelaev18007027m.g	HOMEZ.L	28.2791	24.05	87.7676	86.8799	78.8556	87.7676	0.322204	0.274019	1	0.989885	0.898459	homez.L	72.1631	35.75	87.1771	93.4721	93.9712	93.9712	0.767928	0.380436	0.9277	0.994689	1
Xelaev18007483m.g	GIT2.L	22.4019	23.5589	43.1633	32.8304	39.6792	43.1633	0.519004	0.545809	1	0.760611	0.919283	git2.L	23.4878	27.5493	49.5455	45.4857	44.6176	49.5455	0.474066	0.556041	1	0.91806	0.90054
Xelaev18007504m.g	TPST2.L	27.6786	28.9038	77.09	67.3604	68.4607	77.09	0.359042	0.374936	1	0.873789	0.888062	tpst2.L	41.9259	32.5484	81.6667	82.137	68.2532	82.137	0.510439	0.39627	0.994274	1	0.830967
Xelaev18007562m.g	POP5.L	29.5346	28.9769	72.8342	68.5337	71.5294	72.8342	0.405504	0.397847	1	0.940955	0.982085	pop5.L	35.886	30.6559	69.1986	74.1844	63.0172	74.1844	0.48374	0.413239	0.932791	1	0.849467
Xelaev18007695m.g	CDC45.L	32.5982	37.7344	72.9321	68.1796	65.2035	72.9321	0.446967	0.517391	1	0.934836	0.89403	cdc45.L	36.2583	45.2436	75.3796	73.9633	57.1735	75.3796	0.481009	0.60021	1	0.981212	0.758474
Xelaev18007729m.g	EP400.L	38.9008	42.1051	95.8692	97.9482	104.452	104.452	0.372426	0.403104	0.917827	0.937732	1	ep400.L	64.5417	44.8808	84.7421	96.4683	106.295	106.295	0.607191	0.422227	0.797232	0.907548	1
Xelaev18007772m.g	ATP6V0A2.L	40.476	42.1262	90.9064	89.8898	92.1236	92.1236	0.439367	0.457279	0.986788	0.975753	1	atp6v0a2.L	45.4102	46.8884	97.0655	102.399	90.9464	102.399	0.443463	0.457898	0.947914	1	0.888156
Xelaev18007789m.g	ARL6IP4.L	22.6307	26.9103	58.9716	57.6996	65.1536	65.1536	0.347343	0.413029	0.905117	0.885593	1	arl6ip4.L	26.2819	21.5269	38.4121	42.6943	47.5478	47.5478	0.552746	0.452743	0.807861	0.897924	1
Xelaev18007855m.g	ATXN2.L	29.2649	31.0979	76.2291	68.9693	64.6783	76.2291	0.383907	0.407953	1	0.904764	0.848473	atxn2.L	25.6634	32.7057	67.7354	61.6102	42.2701	67.7354	0.378877	0.482845	1	0.909571	0.624047
Xelaev18007915m.g	XELAEV18007915M.G	34.3874	36.6333	76.5798	76.899	62.3333	76.899	0.447176	0.476383	0.995849	1	0.810587	Xelaev18007915m.g	43.3895	32.0319	53.7434	63.5052	44.7692	63.5052	0.683244	0.504398	0.846283	1	0.704969
Xelaev18007951m.g	LMNB1.L	19.635	19.5955	55.9612	61.6447	66.8552	66.8552	0.293695	0.293104	0.83705	0.922063	1	lmnb1.L	25.6749	22.2803	66.4337	56.8777	59.7556	66.4337	0.386475	0.335377	1	0.856157	0.899478
Xelaev18007962m.g	CEP120.L	37.0205	38.9314	83.4059	87.2495	88.4831	88.4831	0.418391	0.439987	0.94262	0.986059	1	cep120.L	54.8601	50.2617	93.8037	97.5838	84.5665	97.5838	0.562184	0.515062	0.961264	1	0.866604
Xelaev18007986m.g	CDO1.L	14.0044	13.8271	25.5511	23.3794	28.1573	28.1573	0.497365	0.491068	0.907443	0.830316	1	cdo1.L	15.2287	13.9287	25.2032	56.4802	44.0624	56.4802	0.269629	0.246612	0.446231	1	0.780138
Xelaev18008182m.g	AGGF1.L	24.8151	24.3683	57.8281	48.2116	39.4309	57.8281	0.429119	0.421393	1	0.833705	0.681864	aggf1.L	29.4925	28.5803	49.4355	44.2989	41.529	49.4355	0.596586	0.578134	1	0.896094	0.840065
Xelaev18008213m.g	CCNB1.L	25.8417	26.8315	90.1338	84.0988	81.5033	90.1338	0.286704	0.297685	1	0.933044	0.904248	ccnb1.L	47.5794	34.4895	101.284	80.9074	80.6819	101.284	0.469761	0.340522	1	0.798814	0.796588
Xelaev18008336m.g	PRKAA1.L	20.2039	21.3947	41.6898	53.4206	54.9921	54.9921	0.367397	0.38905	0.758105	0.971423	1	prkaa1.L	26.4222	20.4451	61.485	71.324	74.5915	74.5915	0.354225	0.274094	0.824289	0.956194	1
Xelaev18008396m.g	FUT11.L	36.4574	41.4158	81.4886	82.8797	80.8306	82.8797	0.439883	0.49971	0.983215	1	0.975277	fut11.L	48.3084	52.6582	94.3481	100.489	85.1394	100.489	0.480733	0.52402	0.938891	1	0.847251
Xelaev18008451m.g	LIPG.L	52.412	56.2109	97.8732	94.483	90.6554	97.8732	0.53551	0.574324	1	0.965361	0.926254	lipg.L	47.9871	60.0644	107.791	98.655	97.1618	107.791	0.445186	0.55723	1	0.915243	0.901391
Xelaev18008547m.g	LOC101732660.L	32	32.1196	75.8519	68.5	70.7692	75.8519	0.421875	0.423451	1	0.903076	0.932993	loc101732660.L	47.013	31.2273	72.2427	85.56	78.0282	85.56	0.549474	0.364975	0.844352	1	0.91197
Xelaev18008865m.g	FGFR3.S	35.8529	41.802	73.5132	63.6078	89.8762	89.8762	0.398915	0.465107	0.817938	0.707727	1	fgfr3.S	36.2468	51.2537	89.0139	87.7356	67.5704	89.0139	0.407203	0.575795	1	0.98564	0.759099
Xelaev18008948m.g	TAPT1.S	22.4526	26.5	68.0261	60.457	68.7143	68.7143	0.326753	0.385655	0.989985	0.879831	1	tapt1.S	27.3175	22.47	40.5054	36.9649	58.9474	58.9474	0.463421	0.381188	0.687145	0.627083	1
Xelaev18008962m.g	ADGRA3.S	18.5587	19.7191	44.7069	52.8869	56.65	56.65	0.327602	0.348086	0.789179	0.933573	1	adgra3.S	27.8112	20.6174	42.8458	43.0178	48.0677	48.0677	0.578585	0.428925	0.891365	0.894942	1
Xelaev18009259m.g	ANAPC10.S	16.198	17.9465	45.5	42.5872	43.7908	45.5	0.356	0.394428	1	0.935983	0.962436	anapc10.S	25.1279	22.1114	38.3856	31.2025	25.5205	38.3856	0.654616	0.576034	1	0.812868	0.664847
Xelaev18009424m.g	DNAJB14.S	43.5826	50.422	89.8254	83.2714	78.4879	89.8254	0.485193	0.561334	1	0.927037	0.873784	dnajb14.S	43.7211	55.5109	86.6438	83.6772	62.5949	86.6438	0.504607	0.640679	1	0.965761	0.722439
Xelaev18009558m.g	LEPROTL1.S	19.7885	30.8421	60.8557	57.3946	65.7672	65.7672	0.300886	0.468958	0.925319	0.872692	1	leprotl1.S	33.5263	31.0522	54.6395	59.5462	44.6759	59.5462	0.563031	0.521481	0.9176	1	0.750274
Xelaev18009644m.g	RAX2.S	29.736	34.6475	105.446	94.0612	87.0313	105.446	0.282001	0.32858	1	0.892029	0.825361	rax2.S	52.338	45.875	80.3019	90.1398	95.6604	95.6604	0.547123	0.479561	0.839448	0.94229	1
Xelaev18009646m.g	APBA3.S	44.3543	47.0616	97.478	94.7042	87.7828	97.478	0.455018	0.482792	1	0.971544	0.900539	apba3.S	58.9103	51.5354	99.8423	104.053	92.7792	104.053	0.566159	0.495282	0.959538	1	0.891657
Xelaev18009726m.g	TCF3.S	18.5357	19.64	62.7262	61.5614	68.8895	68.8895	0.269064	0.285094	0.910533	0.893625	1	tcf3.S	26.4638	23.8796	51.1855	55.3444	52.605	55.3444	0.478167	0.431473	0.924854	1	0.950503
Xelaev18009787m.g	WDR18.S	29.3728	27.9751	43.5455	53.759	63.2857	63.2857	0.46413	0.442045	0.688077	0.849466	1	wdr18.S	33.5306	35.9016	47.8841	58.4217	73.3305	73.3305	0.457253	0.489587	0.65299	0.79669	1
Xelaev18009788m.g	ARID3A.S	15.5259	21.273	36.0201	30.8407	39.4118	39.4118	0.39394	0.539762	0.913942	0.782525	1	arid3a.S	25.2302	25.011	31.8667	58.2963	25.1429	58.2963	0.432792	0.429032	0.546633	1	0.431294
Xelaev18009834m.g	RANBP3.S	24.3264	26.2953	54.5746	58.3518	50.3804	58.3518	0.416892	0.450634	0.93527	1	0.863392	ranbp3.S	33.1697	35.7874	48.0943	58.9655	53.1955	58.9655	0.562527	0.606921	0.815635	1	0.902146
Xelaev18009841m.g	ANP32C.S	26.5809	30.1598	89.8127	82.9683	91.8763	91.8763	0.289312	0.328265	0.97754	0.903043	1	anp32c.S	68.6421	37.8284	102.278	90.8562	89.168	102.278	0.671133	0.369858	1	0.888326	0.87182
Xelaev18009967m.g	NCBP1.S	13.2762	14.872	77.107	86.6142	87.0582	87.0582	0.152498	0.170829	0.885695	0.9949	1	ncbp1.S	42.0835	17.397	94.6965	93.1414	102.481	102.481	0.410648	0.169759	0.924043	0.908868	1
Xelaev18010134m.g	GNAQ.S	22.6746	22.6419	50.6296	63.2751	62.0703	63.2751	0.358349	0.357832	0.800151	1	0.980958	gnaq.S	23.302	25.6667	45.7805	56.1118	38.4733	56.1118	0.415279	0.45742	0.81588	1	0.685655
Xelaev18010151m.g	HNRNPK.S	29.1495	26.8502	76.1969	54.9577	66.5214	76.1969	0.382556	0.35238	1	0.721259	0.87302	hnrnpk.S	30.586	26.8093	51.483	46.6129	45.6226	51.483	0.594099	0.520742	1	0.905404	0.886168
Xelaev18010164m.g	DAPK1.S	20.4788	22.7843	48.8378	62.8774	55.8072	62.8774	0.325694	0.362361	0.776716	1	0.887557	dapk1.S	63.0685	23.4688	71.3529	65.8837	57.4453	71.3529	0.883895	0.328911	1	0.92335	0.805086
Xelaev18010192m.g	XELAEV18010192M.G	43.2478	46.2354	78.1935	73.2253	85.3898	85.3898	0.506476	0.541463	0.915725	0.857542	1	Xelaev18010192m.g	32.7232	38.6438	82.25	79.3996	69.7239	82.25	0.39785	0.469833	1	0.965345	0.847707
Xelaev18010193m.g	XELAEV18010193M.G	38.9151	46.1009	85.7578	77.8371	76.7132	85.7578	0.453779	0.537571	1	0.907639	0.894533	Xelaev18010193m.g	32.3561	37.7227	83.6154	73.0601	70.6734	83.6154	0.386963	0.451146	1	0.873763	0.845219
Xelaev18010609m.g	KMT5A.S	18.8911	25.6122	54.7639	57.0242	49.3097	57.0242	0.331282	0.449147	0.960362	1	0.864716	kmt5a.S	18.3701	21.315	53.8413	42.7119	31.9535	53.8413	0.34119	0.395885	1	0.793292	0.593476
Xelaev18010661m.g	ATXN2.S	20.466	24.1254	65.5986	57.9383	53.2482	65.5986	0.311988	0.367774	1	0.883225	0.811728	atxn2.S	31.8367	41.3661	78.3115	68.9783	54.4251	78.3115	0.406539	0.528225	1	0.880819	0.694982
Xelaev18010763m.g	CDO1.S	26.7336	32.2917	63.4223	48.2455	61.0104	63.4223	0.421517	0.509153	1	0.760701	0.96197	cdo1.S	45.2835	27.2555	64.734	54.3858	65.6774	65.6774	0.689484	0.414991	0.985636	0.828075	1
Xelaev18010865m.g	XETROV90003391M.S	19.283	31.5578	66.3768	53.0643	61.9357	66.3768	0.290508	0.475434	1	0.79944	0.933092	Xetrov90003391m.S	43.341	29.3803	59.2972	59.0295	56.0159	59.2972	0.730912	0.495475	1	0.995486	0.944663
Xelaev18010908m.g	AGGF1.S	17.8801	23.3746	46.6921	40.3631	44.0379	46.6921	0.382937	0.500612	1	0.864453	0.943157	aggf1.S	28.819	22.9595	48.15	48.331	46.5033	48.331	0.596285	0.475046	0.996255	1	0.962183
Xelaev18010928m.g	CCNB1.S	23.5868	24.5439	87.904	88.0585	86.4694	88.0585	0.267854	0.278723	0.998246	1	0.981954	ccnb1.S	49.6206	31.0965	103.997	91.9916	85.9878	103.997	0.477134	0.299012	1	0.884558	0.826827
Xelaev18011000m.g	PRKAA1.S	24.1348	27.3688	57.3281	38.7471	49.5634	57.3281	0.420995	0.477406	1	0.675883	0.864556	prkaa1.S	31.8896	32.3488	45.5625	54.9242	71.314	71.314	0.447172	0.453612	0.6389	0.770175	1
Xelaev18011044m.g	XELAEV18011044M.G	34.4277	41.4928	72.7992	71.8384	66.7148	72.7992	0.472914	0.569963	1	0.986802	0.916423	Xelaev18011044m.g	45.0563	50.9381	88.1583	81.7297	51.9565	88.1583	0.511084	0.577802	1	0.927079	0.589355
Xelaev18011045m.g	FUT11.S	23.1701	24.9756	54.8534	51.107	52.6664	54.8534	0.4224	0.455316	1	0.931701	0.960129	fut11.S	37.9634	35.0795	66.0097	69.8194	63.8279	69.8194	0.543738	0.502432	0.945435	1	0.914187
Xelaev18011694m.g	FAM222B.L	22.8244	27.323	49.8491	38.8421	45.2886	49.8491	0.457871	0.548114	1	0.779194	0.908514	fam222b.L	35.1552	22.2211	56.8105	51.3475	53.4018	56.8105	0.618814	0.391143	1	0.903837	0.939998
Xelaev18011838m.g	KLHL15.L	20.4667	23.9502	56.3611	44.9755	57.1166	57.1166	0.358332	0.419321	0.986773	0.787433	1	klhl15.L	44.42	26.3214	46.0896	59.8667	49.1176	59.8667	0.741982	0.439668	0.76987	1	0.820451
Xelaev18011910m.g	XELAEV18011910M.G	23.3917	26.1449	59.6082	56.8905	68.979	68.979	0.339113	0.379027	0.864149	0.824751	1	Xelaev18011910m.g	37.0829	27.2034	61.0366	63.2518	63.9977	63.9977	0.579441	0.425068	0.953731	0.988345	1
Xelaev18011915m.g	MNT.L	21.6719	21.3377	48.5217	34.321	40.6629	48.5217	0.446643	0.439756	1	0.707332	0.838035	mnt.L	26.0303	24.7133	47.3704	53.6989	41.6324	53.6989	0.484745	0.460219	0.882147	1	0.775292
Xelaev18011916m.g	METTL16.L	19.1285	19.7989	52.1057	59.6019	57.4713	59.6019	0.320938	0.332187	0.874229	1	0.964253	mettl16.L	23.0064	18.0144	40.0894	34.4272	44.5981	44.5981	0.515861	0.403927	0.898905	0.771943	1
Xelaev18011954m.g	G0S2.L	31.4574	32.2822	90.0356	100.23	98.9822	100.23	0.313851	0.322081	0.898288	1	0.987548	g0s2.L	60.0169	77.5127	93.3731	112.891	103.249	112.891	0.531636	0.686615	0.827108	1	0.914594
Xelaev18012059m.g	SNRNP40.L	27.8319	28.1411	63.448	63.9433	61.6934	63.9433	0.435259	0.440095	0.992254	1	0.964815	snrnp40.L	38.368	33.6636	52.9669	60.7566	54.3415	60.7566	0.631504	0.554073	0.871788	1	0.894413
Xelaev18012073m.g	RCC1.L	39.0661	39.0779	101.48	91.608	92.7832	101.48	0.384964	0.38508	1	0.90272	0.9143	rcc1.L	50.2405	47.8076	95.0038	93.2277	88.0628	95.0038	0.528826	0.503218	1	0.981304	0.926939
Xelaev18012102m.g	FAM46B.L	27.7135	30.0929	76.5959	61.6263	68.7028	76.5959	0.361815	0.392878	1	0.804564	0.896952	fam46b.L	41.4329	36.068	65.8909	64.7774	59.0314	65.8909	0.628811	0.54739	1	0.983101	0.895897
Xelaev18012106m.g	GPATCH3.L	19.4606	19.6545	50.3453	58.0374	54.6594	58.0374	0.335312	0.338653	0.867463	1	0.941797	gpatch3.L	22.3658	20.6795	64.8229	69.2211	67.0792	69.2211	0.323106	0.298746	0.936461	1	0.969057
Xelaev18012110m.g	HMGN2.L	20.1003	21.0603	58.7292	46.1881	49.0921	58.7292	0.342255	0.3586	1	0.78646	0.835907	hmgn2.L	29.9713	22.6029	35.7507	51.9089	57.465	57.465	0.521557	0.393333	0.622129	0.903314	1
Xelaev18012159m.g	VEZF1.L	19.6667	19.6814	39.9873	43.1835	44.8052	44.8052	0.438937	0.439265	0.892471	0.963805	1	vezf1.L	27.7232	23.2188	42.1491	29.4156	48.1016	48.1016	0.576346	0.482703	0.876253	0.611531	1
Xelaev18012183m.g	SYNRG.L	25.9744	21.0407	85.5749	84.1128	88.4577	88.4577	0.293636	0.237862	0.96741	0.950881	1	synrg.L	40.176	41.0435	88.9295	100.743	85.2467	100.743	0.398795	0.407406	0.882733	1	0.846177
Xelaev18012196m.g	MAPKAPK2.L	23.5487	27.9091	61.8571	54.9884	56.4058	61.8571	0.380694	0.451186	1	0.888958	0.911872	mapkapk2.L	47.0198	30.1398	59.1429	53.0714	60.1212	60.1212	0.782083	0.501317	0.983727	0.88274	1
Xelaev18012295m.g	CELSR2.L	37.3857	36.7396	92.1526	97.283	105.265	105.265	0.355158	0.34902	0.875435	0.924173	1	celsr2.L	59.4676	42.1802	90.8515	103.717	108.944	108.944	0.545856	0.387175	0.833931	0.952029	1
Xelaev18012490m.g	CITED4.L	33.425	37.6739	88.4298	91.6408	91.5814	91.6408	0.364739	0.411103	0.964961	1	0.999351	cited4.L	42.3393	39.564	82.8667	70.663	77.8374	82.8667	0.510933	0.477441	1	0.852732	0.939309
Xelaev18012536m.g	MARCKSL1.L	30.6	30.0025	94.1685	88.5994	88.4944	94.1685	0.324949	0.318604	1	0.94086	0.939745	marcksl1.L	39.287	36.8792	96.2776	90.3844	82.458	96.2776	0.40806	0.383051	1	0.938789	0.856461
Xelaev18012563m.g	SMAP2.L	40.9671	47.1378	99.3305	94.8178	95.3419	99.3305	0.412432	0.474555	1	0.954569	0.959845	smap2.L	53.8229	46.7435	91.2671	88.9509	88.2919	91.2671	0.589729	0.512161	1	0.974622	0.967401
Xelaev18012653m.g	MED13.L	29.108	30.5843	60.3288	58.9541	53.2395	60.3288	0.482488	0.50696	1	0.977213	0.882489	med13.L	29.9005	31.0547	58.8639	60.4199	49.1481	60.4199	0.494878	0.51398	0.974247	1	0.813443
Xelaev18012683m.g	TAF15.L	25.0581	27.6885	42.7088	52.9542	51.0801	52.9542	0.473203	0.522875	0.806522	1	0.964609	taf15.L	35.3872	29.2499	48.6816	58.5893	64.647	64.647	0.547391	0.452456	0.753037	0.906295	1
Xelaev18012719m.g	PRR11.L	22.8272	24.9415	41.5714	36.9572	54.4958	54.4958	0.41888	0.457677	0.762837	0.678166	1	prr11.L	27.4211	22.7021	48.5439	43.5	52.527	52.527	0.522037	0.432199	0.924169	0.828145	1
Xelaev18012773m.g	MRPS17.L	35.3919	34.9235	92.1662	82.5696	86.0563	92.1662	0.384001	0.378918	1	0.895877	0.933708	mrps17.L	45.0792	34.2174	61.36	64.6898	62.3915	64.6898	0.696852	0.528946	0.948527	1	0.964472
Xelaev18012841m.g	LOC100498345.L	33.2058	38.9013	81.1606	78.8023	84.2599	84.2599	0.394087	0.461683	0.963217	0.935228	1	loc100498345.L	34.1983	37.2766	83.2053	80.0674	74.5409	83.2053	0.411012	0.448008	1	0.962287	0.895868
Xelaev18012842m.g	LOC100486773.L	32.8021	39.3991	76.4181	76.6639	84.1929	84.1929	0.389606	0.467963	0.907655	0.910575	1	loc100486773.L	33.2222	36.1723	82.2176	76.9069	72.6123	82.2176	0.404077	0.439958	1	0.935406	0.883172
Xelaev18012917m.g	CCDC138.L	27.5055	38.6601	81.8345	71.1441	78.8765	81.8345	0.336112	0.472418	1	0.869366	0.963854	ccdc138.L	57.8065	31.9189	81.4115	91.4087	80.1036	91.4087	0.632396	0.349189	0.890633	1	0.876323
Xelaev18012970m.g	SEPT10.L	28.5887	31.6513	79.8193	56.5094	63.404	79.8193	0.358168	0.396537	1	0.707966	0.794344	sept10.L	33.461	36.9459	52.4917	62.8131	68.6828	68.6828	0.487182	0.537922	0.764263	0.914539	1
Xelaev18012981m.g	GAS6.L	36.4438	28.7037	77.6223	78.9363	81.1753	81.1753	0.448951	0.353601	0.956231	0.972418	1	gas6.L	40.0408	55.6276	80.8557	77.0081	80.6111	80.8557	0.495213	0.687985	1	0.952413	0.996975
Xelaev18013122m.g	TM9SF2.L	39.1705	40.6	68.0439	87.8496	80.2126	87.8496	0.445881	0.462153	0.774549	1	0.913067	tm9sf2.L	50.7197	39.7152	77.557	79.5118	68.6034	79.5118	0.637889	0.499488	0.975415	1	0.862807
Xelaev18013247m.g	XELAEV18013247M.G	20.7778	19.1429	86.1134	90.6242	91.4779	91.4779	0.227134	0.209262	0.941357	0.990667	1	Xelaev18013247m.g	32.1084	26.5	84.4327	92.6139	89.0404	92.6139	0.346691	0.286134	0.911664	1	0.961416
Xelaev18013426m.g	LRP1.L	23.4456	27.8921	64.9645	64.4766	70.8663	70.8663	0.330843	0.393587	0.916719	0.909835	1	lrp1.L	45.2449	40.3466	90.4968	86.0933	82.3329	90.4968	0.499961	0.445834	1	0.951341	0.909787
Xelaev18013514m.g	SENP1.L	24.8651	27.9781	61	54.9784	60.8447	61	0.407624	0.458657	1	0.901286	0.997453	senp1.L	28.4444	25.9154	47.6825	67.9091	50.19	67.9091	0.418861	0.381619	0.702153	1	0.739076
Xelaev18013531m.g	SLC48A1.L	27.9829	29.0941	79.6822	66.7962	67.2535	79.6822	0.351181	0.365127	1	0.838282	0.844021	slc48a1.L	30.4155	37.3253	70.5746	69.3927	48.5222	70.5746	0.43097	0.528877	1	0.983253	0.687531
Xelaev18013534m.g	BIRC5.1.L	28.145	28.8962	85.5089	83.7126	83.8047	85.5089	0.329146	0.337931	1	0.978992	0.98007	birc5.1.L	43.2297	39.467	93.067	83.6163	85.4543	93.067	0.464501	0.424071	1	0.898453	0.918202
Xelaev18013589m.g	CDCA7-LIKE.1.L	43.7197	44.0361	87.5947	96.7908	97.9349	97.9349	0.446416	0.449647	0.894418	0.988318	1	cdca7-like.1.L	58.1987	48.1679	81.6798	91.9635	90.2776	91.9635	0.632846	0.523772	0.888177	1	0.981667
Xelaev18013667m.g	INTS6.L	22.0594	25.8265	56.9423	48.4859	67.1378	67.1378	0.32857	0.384679	0.848141	0.722185	1	ints6.L	28.6152	23.2005	46.188	46.6881	44.4444	46.6881	0.6129	0.496924	0.989288	1	0.951944
Xelaev18013704m.g	CCNA1.L	18.4006	19.9444	50.916	48.5928	56.7372	56.7372	0.324313	0.351523	0.8974	0.856454	1	ccna1.L	29.6136	19.5	45.2857	49.7238	50.3171	50.3171	0.588541	0.387542	0.900007	0.988209	1
Xelaev18013713m.g	KIAA1456.L	27.3815	24.0328	39.8532	43.3277	48.9032	48.9032	0.559913	0.491435	0.81494	0.885988	1	kiaa1456.L	23.7878	29.1776	57.6324	51.9091	65.7635	65.7635	0.361718	0.443675	0.876358	0.78933	1
Xelaev18013718m.g	PDS5B.L	16.63	15.3365	34.0568	28.6033	33.9536	34.0568	0.488303	0.450322	1	0.83987	0.99697	pds5b.L	27.35	16.6515	29.437	45.9524	45.9457	45.9524	0.595181	0.362365	0.640597	1	0.999854
Xelaev18013843m.g	XELAEV18013843M.G	31.0125	31.6983	83.7759	84.5757	88.883	88.883	0.348914	0.356629	0.942541	0.95154	1	Xelaev18013843m.g	45.2701	33.5632	73.4012	79.3623	80.6375	80.6375	0.561403	0.416224	0.910262	0.984186	1
Xelaev18013930m.g	LOC100489326.L	34.7615	36.1429	75.8636	77.8483	78.3782	78.3782	0.44351	0.461134	0.967918	0.99324	1	loc100489326.L	61.711	41.4578	80.6341	80.0533	79.7176	80.6341	0.765321	0.514147	1	0.992797	0.988633
Xelaev18014041m.g	AQP11.L	23.0659	20.3587	56.7292	49.7923	53.181	56.7292	0.406597	0.358875	1	0.87772	0.937453	aqp11.L	26.2344	20.1	34.3651	33.8462	37.0362	37.0362	0.708344	0.542712	0.927877	0.913866	1
Xelaev18014248m.g	C3ORF38.S	22.9112	26.6083	51.795	40.5826	66.8182	66.8182	0.342889	0.39822	0.775163	0.607359	1	c3orf38.S	32.9059	21.8618	45.4749	55.7412	56.4177	56.4177	0.583254	0.3875	0.80604	0.988008	1
Xelaev18014341m.g	ETS2.S	18.4449	18.8543	40.9008	41.0598	47.4417	47.4417	0.388791	0.397421	0.862126	0.865478	1	ets2.S	23.756	19.1925	33.6557	30.7157	38.565	38.565	0.615998	0.497666	0.872702	0.796465	1
Xelaev18014436m.g	NDC80.S	33.5749	35.7245	104.396	107.43	110.673	110.673	0.303369	0.322792	0.943281	0.970696	1	ndc80.S	57.4863	43.2367	108.631	112.318	102.906	112.318	0.511819	0.38495	0.967178	1	0.916204
Xelaev18014595m.g	XELAEV18014595M.G	29.4922	26.911	65.4286	54.1825	68.5556	68.5556	0.430194	0.392542	0.954388	0.790345	1	Xelaev18014595m.g	43.5918	26.0925	67.8634	52.9116	55.2922	67.8634	0.642347	0.384486	1	0.779679	0.814758
Xelaev18014639m.g	G0S2.S	14.2576	20.5094	76.5858	104.064	101.2	104.064	0.137008	0.197085	0.735951	1	0.972481	g0s2.S	66.5856	16.1184	85.9378	94.8595	94.8091	94.8595	0.70194	0.169919	0.905949	1	0.999469
Xelaev18014671m.g	NGF.S	31.3973	36.3898	76.5824	67.875	68.0303	76.5824	0.40998	0.475172	1	0.8863	0.888328	ngf.S	30.0299	33.8632	83.66	71.8043	53.9221	83.66	0.358951	0.404771	1	0.858288	0.644538
Xelaev18014810m.g	SLC16A1.S	27.5087	31.4991	67.5104	74.994	78.4042	78.4042	0.350858	0.401752	0.861056	0.956504	1	slc16a1.S	59.5666	39.7148	81.9502	99.7792	86.75	99.7792	0.596984	0.398027	0.821315	1	0.869419
Xelaev18014836m.g	BRPF3.S	30.1094	35.4484	63.2153	59.7803	53.0769	63.2153	0.4763	0.560756	1	0.945661	0.839622	brpf3.S	33.2985	37.0709	68.5582	64.5258	46.3627	68.5582	0.485697	0.540721	1	0.941183	0.676254
Xelaev18014856m.g	SNRPC.S	15.7504	18.0659	30.7188	26.3175	37.9853	37.9853	0.414644	0.475602	0.8087	0.692834	1	snrpc.S	28.61	25.0208	40.4946	39.6324	49.7364	49.7364	0.575232	0.503069	0.814184	0.796849	1
Xelaev18014980m.g	MAPKAPK2.S	20.0285	20.7828	36.8787	45.0351	48.7733	48.7733	0.410645	0.42611	0.756124	0.923357	1	mapkapk2.S	39.0148	31.7036	52.5134	56.2414	61.0836	61.0836	0.638711	0.51902	0.859697	0.920729	1
Xelaev18014995m.g	SYNRG.S	18.2793	17.4377	45.4183	33.8391	37.1552	45.4183	0.402465	0.383936	1	0.745054	0.818066	synrg.S	22.5678	26.6503	46.65	53.6667	35.8693	53.6667	0.420518	0.49659	0.869255	1	0.668372
Xelaev18015088m.g	PHACTR4.S	27.0909	31	59.0085	44.7686	64.8447	64.8447	0.417782	0.478066	0.909999	0.690398	1	phactr4.S	31.8246	33.3065	63.3333	70.8361	83.0805	83.0805	0.383057	0.400894	0.762313	0.85262	1
Xelaev18015101m.g	RCC1.S	41.0228	45.9572	104.611	95.1532	98.443	104.611	0.392145	0.439314	1	0.90959	0.941037	rcc1.S	60.9547	53.8948	102.863	100.223	97.7366	102.863	0.592584	0.52395	1	0.97434	0.950167
Xelaev18015143m.g	CLSPN.S	20.7078	25.5567	34.9101	31.488	40.5448	40.5448	0.510738	0.630334	0.861025	0.776622	1	clspn.S	26.695	26.5708	64.3125	59.5161	61.8182	64.3125	0.415083	0.413152	1	0.925421	0.961216
Xelaev18015161m.g	HNRNPR.S	14.5486	13.7376	30.25	29.3629	38.4718	38.4718	0.378162	0.357082	0.786291	0.763233	1	hnrnpr.S	16.4696	13.9752	34.0478	25.8409	16.6562	34.0478	0.483719	0.410459	1	0.758958	0.489202
Xelaev18015178m.g	YRDC.S	26.1908	29.2928	84.1425	85.8379	89.334	89.334	0.293178	0.327902	0.941887	0.960864	1	yrdc.S	46.7011	36.3498	87.9972	92.1335	88.7795	92.1335	0.506886	0.394534	0.955105	1	0.963597
Xelaev18015180m.g	SF3A3.S	28.115	28.8377	54.0687	58.6602	53.0139	58.6602	0.479286	0.491606	0.921728	1	0.903745	sf3a3.S	32.0436	27.2868	55.8898	66.9098	57.1893	66.9098	0.478908	0.407815	0.835301	1	0.854722
Xelaev18015209m.g	MARCKSL1.S	17.7676	19.7812	90.8783	83.8346	89.924	90.8783	0.195509	0.217667	1	0.922493	0.9895	marcksl1.S	43.3462	23.7953	97.1546	89.4744	86.2635	97.1546	0.446157	0.244922	1	0.920949	0.887899
Xelaev18015286m.g	MED13.S	23.9212	27.7186	62.2678	52.0438	48.6091	62.2678	0.384167	0.445152	1	0.835806	0.780647	med13.S	23.936	29.8487	60.8914	55.8018	39.5217	60.8914	0.393093	0.490196	1	0.916414	0.649053
Xelaev18015309m.g	TAF15.S	22.1227	23.7182	43.7737	48.8022	49.8139	49.8139	0.444107	0.476137	0.878744	0.97969	1	taf15.S	30.4473	26.8175	48.5813	60.9438	68.0714	68.0714	0.447285	0.393962	0.713682	0.895291	1
Xelaev18015506m.g	TBC1D8.S	19.8282	21.1524	45.8919	54.9994	59.2663	59.2663	0.334561	0.356904	0.774334	0.928004	1	tbc1d8.S	28.2195	22.7896	50.3908	58.939	68.3975	68.3975	0.412581	0.333194	0.736735	0.861712	1
Xelaev18015567m.g	CHST7.S	37.1963	37.1955	87.3106	70.5253	62.1644	87.3106	0.426023	0.426013	1	0.807753	0.711992	chst7.S	33.75	44.164	71.2414	80.4304	55.0895	80.4304	0.419618	0.549096	0.885752	1	0.684934
Xelaev18015672m.g	TGDS.S	28.8986	29.4227	79.6154	78.4914	80.5582	80.5582	0.358729	0.365236	0.988297	0.974345	1	tgds.S	60.7646	32.6045	77.0191	76.1846	81.0231	81.0231	0.749967	0.40241	0.950582	0.940282	1
Xelaev18015811m.g	NCKAP5L.S	18.4311	22.8	60.6508	53.2169	44.3636	60.6508	0.303889	0.375923	1	0.877432	0.73146	nckap5l.S	29.0085	27.9898	53.5	69.6187	64.5421	69.6187	0.416677	0.402044	0.768472	1	0.92708
Xelaev18015916m.g	LRP1.S	20.0646	19.2232	49.2513	49.4428	49.1131	49.4428	0.405815	0.388797	0.996128	1	0.993333	lrp1.S	27.6884	21.6115	43.8401	37.4707	35.0305	43.8401	0.631577	0.492963	1	0.854714	0.799051
Xelaev18015999m.g	BIRC5.1.S	20.9425	21.5776	78.8829	82.2704	80.8427	82.2704	0.254557	0.262276	0.958825	1	0.982646	birc5.1.S	37.3069	26.3953	98.2512	91.1319	88.1564	98.2512	0.379709	0.268651	1	0.92754	0.897256
Xelaev18016014m.g	HNRNPA1.S	27.2368	29.1304	60.0932	67.6156	71.6094	71.6094	0.380353	0.406795	0.83918	0.944228	1	hnrnpa1.S	37.8284	31.1795	61.3212	68.3215	78.3573	78.3573	0.482768	0.397915	0.782584	0.871922	1
Xelaev18016158m.g	CCNA1.S	18.0927	20.672	48.9412	48.8645	51.4433	51.4433	0.351701	0.40184	0.951362	0.94987	1	ccna1.S	31.5739	19.8927	44.9844	38.2639	49.9703	49.9703	0.631854	0.398091	0.900223	0.765734	1
Xelaev18016227m.g	TNFRSF19.S	13.4944	13.7447	25.8885	27.5401	30.851	30.851	0.437406	0.445518	0.839147	0.892683	1	tnfrsf19.S	16.9523	13.4122	24.3863	27.7926	31.6258	31.6258	0.536027	0.424091	0.771088	0.878794	1
Xelaev18016234m.g	SAP18.S	22.4988	22.7475	43.3536	44.987	40.2559	44.987	0.500117	0.505646	0.963691	1	0.894835	sap18.S	21.9196	21.814	50.1214	50.7615	47.8974	50.7615	0.431815	0.429735	0.98739	1	0.943577
Xelaev18016239m.g	IFT88.S	21.9482	23.4079	68.0698	70.7293	70.6625	70.7293	0.310312	0.330951	0.9624	1	0.999056	ift88.S	39.5817	25.6227	84.1739	90.9122	83.799	90.9122	0.435384	0.28184	0.925882	1	0.921758
Xelaev18016347m.g	FZD4.S	30.6418	31.6786	80.2938	93.8924	84.7798	93.8924	0.326351	0.337392	0.855169	1	0.902947	fzd4.S	41.6374	47.2673	101.625	94.8667	88.6207	101.625	0.409714	0.465113	1	0.933494	0.872033
Xelaev18016451m.g	XELAEV18016451M.G	29.7116	30.7093	83.4368	76.7929	82.0164	83.4368	0.356097	0.368055	1	0.920372	0.982977	Xelaev18016451m.g	38.121	29.9355	73.383	85.1775	78.4263	85.1775	0.447548	0.351449	0.86153	1	0.92074
Xelaev18016561m.g	LOC100489883.S	39.9458	44.0497	93.5273	94.1227	91.9975	94.1227	0.424402	0.468003	0.993674	1	0.977421	loc100489883.S	44.4762	47.5033	92.9278	94.699	79.6716	94.699	0.469659	0.501625	0.981297	1	0.841314
Xelaev18016709m.g	KDM7A.L	15.1375	15.1493	53.604	50.8687	57.3511	57.3511	0.263944	0.264151	0.934663	0.88697	1	kdm7a.L	21.8962	18.8976	45.0705	52.5132	57.4545	57.4545	0.381105	0.328913	0.784455	0.913996	1
Xelaev18016974m.g	HMMR.L	18.7051	19.3817	47.4831	48.1079	52.5384	52.5384	0.356026	0.368904	0.903779	0.915671	1	hmmr.L	18.3202	20.7206	34.4169	35.4857	37.6311	37.6311	0.486835	0.550624	0.914585	0.942989	1
Xelaev18016993m.g	SRA1.L	32.1675	30.8221	83.1297	87.2385	88.4299	88.4299	0.363763	0.348549	0.940064	0.986527	1	sra1.L	46.3165	32.9571	77.7319	84.9656	87.7616	87.7616	0.527754	0.37553	0.885716	0.968142	1
Xelaev18017129m.g	SPDL1.L	26.0138	36.2371	83.4966	84.0386	80.2011	84.0386	0.309546	0.431196	0.99355	1	0.954336	spdl1.L	45.6645	38.8016	85.1195	83.7953	81.4086	85.1195	0.536475	0.455848	1	0.984444	0.956404
Xelaev18017185m.g	AFF4.L	20.8476	15.9	35.8496	41.7486	48.5259	48.5259	0.429619	0.32766	0.738772	0.860337	1	aff4.L	41.08	32.7263	61.2447	51.7632	54.0726	61.2447	0.670752	0.534354	1	0.845186	0.882894
Xelaev18017216m.g	PPP2R2B.L	22.6244	24.2796	48.6509	56.6099	44.4231	56.6099	0.399655	0.428894	0.859406	1	0.784723	ppp2r2b.L	26.4559	19.7769	42.4219	51	49.9315	51	0.518743	0.387783	0.831801	1	0.979049
Xelaev18017285m.g	KIAA1191.L	29.0493	35.3605	80.1084	74.5744	89.4661	89.4661	0.324696	0.39524	0.895405	0.833549	1	kiaa1191.L	28.605	31.7581	51.2691	58.3351	55.7893	58.3351	0.490357	0.544408	0.878872	1	0.95636
Xelaev18017379m.g	PARPBP.L	24.4184	29.7445	75.4704	72.2555	73.5928	75.4704	0.323549	0.394122	1	0.957402	0.975121	parpbp.L	75.2036	36.6778	75.6763	72.7321	71.5058	75.6763	0.993753	0.484667	1	0.961094	0.94489
Xelaev18017380m.g	PMCH.L	21.3635	26.7134	76.8411	72.9436	74.0782	76.8411	0.278022	0.347645	1	0.949279	0.964044	pmch.L	75.5091	36.6193	75.6763	72.7253	71.4903	75.6763	0.99779	0.483894	1	0.961005	0.944685
Xelaev18017382m.g	C12ORF73.L	36.8873	33.5328	85.3373	73.4718	71.1023	85.3373	0.432253	0.392945	1	0.860958	0.833192	c12orf73.L	36.046	37.7706	73.612	73.8098	55.6832	73.8098	0.488363	0.511729	0.99732	1	0.754416
Xelaev18017444m.g	LRRIQ1.L	16.3218	18.6979	45.8049	33.6581	33.5214	45.8049	0.356332	0.408206	1	0.734814	0.731829	lrriq1.L	24.297	21.0577	45.5572	43.2278	35.2674	45.5572	0.53333	0.462226	1	0.94887	0.774135
Xelaev18017458m.g	POC1B.L	29.9047	31.9591	79.1561	74.4955	68.4731	79.1561	0.377794	0.403747	1	0.941122	0.865039	poc1b.L	35.4629	34.0306	60.7913	66.9187	40.5109	66.9187	0.52994	0.508536	0.908435	1	0.605375
Xelaev18017652m.g	NAA38-LIKE.L	20.2813	20.3964	54.9539	67.7584	72.6445	72.6445	0.279185	0.28077	0.756478	0.93274	1	naa38-like.L	49.3647	22.5702	75.6685	84.4799	71.2654	84.4799	0.584337	0.267167	0.895699	1	0.843579
Xelaev18017658m.g	LOC779566.L	40.5199	41.1565	75.3414	76.8459	88.1305	88.1305	0.459772	0.466995	0.854884	0.871956	1	loc779566.L	63.4224	42.7635	71.9938	73.8637	82.4402	82.4402	0.769315	0.518722	0.873286	0.895967	1
Xelaev18017703m.g	PIM3.L	25.6847	25.3576	56.4221	47.7522	51.3628	56.4221	0.455225	0.449427	1	0.846338	0.910331	pim3.L	27.2073	28.2521	51.438	59.8702	37.1646	59.8702	0.454437	0.47189	0.859159	1	0.620753
Xelaev18017723m.g	KIF21A.L	23.2694	21.9349	47.0776	47.1495	51.4376	51.4376	0.452381	0.426437	0.915237	0.916636	1	kif21a.L	35.0704	34.9209	78.2224	82.7306	72.7883	82.7306	0.423911	0.422104	0.945507	1	0.879822
Xelaev18017816m.g	SUV39H2.L	23.5559	26.1155	83.4043	87.1854	106.048	106.048	0.222125	0.246261	0.786476	0.822131	1	suv39h2.L	52.9343	28.4119	81.8438	96.1775	96.2853	96.2853	0.549765	0.29508	0.850013	0.998881	1
Xelaev18017894m.g	TMEM209.L	26.6463	32.675	53.5775	77.2243	57.8438	77.2243	0.345051	0.423118	0.69379	1	0.749036	tmem209.L	47.7686	33.6915	66.8367	74.1008	59.1707	74.1008	0.644643	0.454671	0.90197	1	0.798516
Xelaev18017897m.g	KLHDC10.L	28.2572	29.7818	71.8937	73.7779	72.7722	73.7779	0.383003	0.403668	0.974461	1	0.986368	klhdc10.L	35.6313	28.5259	50.902	53.4632	55.0542	55.0542	0.647204	0.518142	0.92458	0.971102	1
Xelaev18018162m.g	CCNB2.L	20.0693	22.5042	89.7934	96.5201	101.354	101.354	0.198011	0.222034	0.885935	0.952303	1	ccnb2.L	46.3777	26.3338	85.5629	81.8848	89.0509	89.0509	0.5208	0.295716	0.960832	0.919528	1
Xelaev18018208m.g	LYSMD2.L	35.6015	33.7226	78.2995	85.5645	82.7056	85.5645	0.416078	0.394119	0.915093	1	0.966588	lysmd2.L	43.2016	36.5	89.3504	88.0631	71.6538	89.3504	0.483508	0.408504	1	0.985592	0.801942
Xelaev18018231m.g	CEP152.L	19.4857	21.5526	59.1474	45.5344	48.0309	59.1474	0.329443	0.364387	1	0.769846	0.812054	cep152.L	34.9031	29.8746	48.1159	49.5369	47.4349	49.5369	0.704588	0.603076	0.971312	1	0.957567
Xelaev18018419m.g	SNRPA1.L	37.1452	40.2708	96.6283	96.9248	100.319	100.319	0.37027	0.401427	0.963209	0.966165	1	snrpa1.L	69.9509	53.3307	105.51	110.762	108.128	110.762	0.631542	0.481489	0.952579	1	0.976219
Xelaev18018453m.g	SMAD6.L	21.8789	24.7227	67.6108	69.2335	80.4648	80.4648	0.271907	0.307248	0.840254	0.86042	1	smad6.L	36.2042	24.05	61.1014	68.2609	75.9919	75.9919	0.476422	0.316481	0.804051	0.898265	1
Xelaev18018601m.g	MAT2A.L	24.3756	31.6413	44.66	44.2041	65.6875	65.6875	0.371085	0.481694	0.679886	0.672945	1	mat2a.L	31.6877	40.2131	60.8611	55.0319	59.5304	60.8611	0.520657	0.660735	1	0.904221	0.978136
Xelaev18018634m.g	OGDH.L	30.8674	34.2441	73.8075	65.7632	64.381	73.8075	0.418215	0.463965	1	0.89101	0.872282	ogdh.L	28.992	31.5495	60.2573	57.7893	48.8401	60.2573	0.481138	0.52358	1	0.959044	0.810526
Xelaev18018649m.g	TCF7L1.L	22.3855	24.3939	53.7922	53.5163	50.9885	53.7922	0.416148	0.453483	1	0.994872	0.947879	tcf7l1.L	24.9613	30.5321	60.4744	57.5315	50.9232	60.4744	0.412758	0.504877	1	0.951337	0.842062
Xelaev18018758m.g	BMP1.L	47.5129	45.5196	108.868	105.53	107.569	108.868	0.436429	0.418119	1	0.969346	0.988076	bmp1.L	58.612	50.1412	113.555	116.003	108.945	116.003	0.50526	0.432239	0.978892	1	0.939154
Xelaev18018762m.g	SLC39A14.L	34.3027	36.7619	49.9394	52.4222	68.1111	68.1111	0.503629	0.539734	0.733205	0.769657	1	slc39a14.L	50.1024	26.9048	74.6667	94.3545	85.1154	94.3545	0.531002	0.285145	0.791341	1	0.90208
Xelaev18018787m.g	KAT6A.L	19.9825	21.0702	46.2712	40.5374	50.843	50.843	0.393023	0.414417	0.91008	0.797307	1	kat6a.L	18.0682	23.7482	46.302	41	36.2542	46.302	0.390225	0.512898	1	0.885491	0.782995
Xelaev18018889m.g	BRD4.L	30.3393	32.375	69.1109	64.7838	66.2972	69.1109	0.438994	0.468449	1	0.937388	0.959286	brd4.L	36.3397	37.4741	74.4394	63.0276	49.4895	74.4394	0.488178	0.503417	1	0.846696	0.66483
Xelaev18018893m.g	WIZ.L	27.7587	29.9222	77.3597	70.9797	81.1966	81.1966	0.34187	0.368515	0.952745	0.874171	1	wiz.L	28.4362	29.2842	53.1446	55.3721	52.8789	55.3721	0.513546	0.528861	0.959771	1	0.954972
Xelaev18018944m.g	ADGRE5.L	41.4852	39.8805	84.5178	83.9813	88.7904	88.7904	0.467226	0.449153	0.951879	0.945837	1	adgre5.L	45.5802	45.4802	96.6059	102.108	92.1186	102.108	0.446392	0.445413	0.946115	1	0.902169
Xelaev18018948m.g	DDX39A.L	41.3961	39.6663	83.1431	82.7617	87.4154	87.4154	0.473556	0.453768	0.951126	0.946763	1	ddx39a.L	43.8427	44.8749	93.4541	96.8144	90.5569	96.8144	0.452853	0.463515	0.965291	1	0.935366
Xelaev18018952m.g	GIPC1.L	40.2519	42.3898	89.8504	87.418	88.5742	89.8504	0.447988	0.471782	1	0.972929	0.985797	gipc1.L	46.4388	45.3789	84.43	89.1611	69.3715	89.1611	0.520842	0.508954	0.946938	1	0.778047
Xelaev18019021m.g	CDKN2D.L	26.7975	32.3018	63.2365	66.3775	66.0592	66.3775	0.403713	0.486637	0.95268	1	0.995204	cdkn2d.L	27.6575	32.5725	50.3739	36.6463	35.2556	50.3739	0.549045	0.646614	1	0.727486	0.699877
Xelaev18019052m.g	DAND5.L	16.6339	16.3406	58.2119	66.3692	74.9618	74.9618	0.221898	0.217986	0.776553	0.885374	1	dand5.L	29.75	16.9045	48.9394	52.8953	51.6566	52.8953	0.562431	0.319584	0.925212	1	0.97658
Xelaev18019083m.g	HOOK2.L	26.4683	24.991	91.7123	78.3968	83.3095	91.7123	0.288601	0.272493	1	0.854812	0.908379	hook2.L	29.8333	21.0461	53.9167	54.8911	46.2437	54.8911	0.5435	0.383415	0.982248	1	0.842464
Xelaev18019084m.g	BEST2.L	26.5054	30.0865	63.6216	79.3443	88.4217	88.4217	0.299761	0.340262	0.719525	0.897339	1	best2.L	34.7304	33.2881	80.3613	69.6552	88.9596	88.9596	0.390406	0.374193	0.903347	0.782998	1
Xelaev18019212m.g	PER1.L	28.153	32.0397	61.6434	64.8353	63.9265	64.8353	0.434223	0.494171	0.950769	1	0.985983	per1.L	32.6609	27.7892	54.7674	61.7979	61.1899	61.7979	0.528512	0.449678	0.886234	1	0.990162
Xelaev18019552m.g	LOC101732042-LIKE.L	33.4243	33.7089	85.7212	74.8033	88.8549	88.8549	0.376167	0.37937	0.964733	0.84186	1	loc101732042-like.L	45.6348	37.0816	85.0023	92.9642	74.0439	92.9642	0.490886	0.398881	0.914356	1	0.796477
Xelaev18019667m.g	CTDNEP1.L	28.4322	31.8182	79.2488	72.3043	82.3199	82.3199	0.345387	0.386519	0.962693	0.878334	1	ctdnep1.L	41.604	24.2864	47.6386	75.3293	75.3952	75.3952	0.551812	0.322121	0.631852	0.999126	1
Xelaev18019746m.g	NUP50.S	32.0293	37.3111	84.401	77.8411	78.5683	84.401	0.37949	0.44207	1	0.922277	0.930893	nup50.S	38.3819	40.1175	72.5356	73.9408	60.9016	73.9408	0.51909	0.542562	0.980996	1	0.823655
Xelaev18019770m.g	KDM7A.S	16.4303	17.7421	86.2907	80.385	70.5833	86.2907	0.190406	0.205608	1	0.93156	0.817972	kdm7a.S	36.6552	27.0816	80.128	76.4952	93.4961	93.4961	0.39205	0.289655	0.857019	0.818165	1
Xelaev18019853m.g	XELAEV18019853M.G	21.7297	25.1111	43.9375	54.1328	44.7818	54.1328	0.401415	0.46388	0.811661	1	0.827258	Xelaev18019853m.g	24.1818	21.4337	63.08	35.7818	52.9851	63.08	0.383352	0.339787	1	0.567245	0.839966
Xelaev18019868m.g	DCP1B.S	21.369	22.6338	45.6552	39.9743	36.8924	45.6552	0.468052	0.495755	1	0.87557	0.808066	dcp1b.S	33.1238	37.8667	66.3871	65.8397	60.8718	66.3871	0.49895	0.570392	1	0.991754	0.916922
Xelaev18019910m.g	CCDC69.S	28.3328	26.1243	57.4252	53.6894	66.5	66.5	0.426057	0.392847	0.863537	0.80736	1	ccdc69.S	30.0015	29.9218	52.2574	57.0492	55.1713	57.0492	0.525888	0.524492	0.916005	1	0.967083
Xelaev18019952m.g	NIPAL4.S	15.3198	15.8087	28.0205	28.8261	28.8208	28.8261	0.531457	0.548418	0.972053	1	0.999816	nipal4.S	16.5404	14.8089	31.9176	34.3858	20.933	34.3858	0.481025	0.430668	0.928221	1	0.608767
Xelaev18019991m.g	CDKN2AIPNL.S	22.9016	26.3851	57.4965	54.8903	67.2484	67.2484	0.340552	0.392353	0.854986	0.816232	1	cdkn2aipnl.S	32.8152	28.7926	64.4476	80.9035	69.4484	80.9035	0.405609	0.355888	0.796598	1	0.858411
Xelaev18020018m.g	CTNNA1.S	27.9278	30.6257	80.0799	76.5644	74.8568	80.0799	0.348749	0.382439	1	0.9561	0.934777	ctnna1.S	61.9658	37.2045	92.1427	87.6927	79.7361	92.1427	0.672498	0.403771	1	0.951705	0.865354
Xelaev18020100m.g	DDX39A.S	44.6401	44.6049	108.236	110.895	111.951	111.951	0.398748	0.398434	0.966822	0.990569	1	ddx39a.S	57.3788	51.408	105.77	111.238	106.715	111.238	0.515819	0.462144	0.950843	1	0.959339
Xelaev18020115m.g	BRD4.S	24.5229	25.3849	50.4868	40.6579	53.4838	53.4838	0.458512	0.474628	0.943964	0.760191	1	brd4.S	39.6096	33.3086	64.8133	61.026	64.6655	64.8133	0.611134	0.513915	1	0.941566	0.997719
Xelaev18020155m.g	LETM2.S	25.0913	30.3554	49.6025	52.289	61.872	61.872	0.405536	0.490616	0.801696	0.845117	1	letm2.S	29.2474	23.5996	26.8109	39.7308	48.4135	48.4135	0.604117	0.487459	0.55379	0.820655	1
Xelaev18020249m.g	TCF7L1.S	20.7694	21.7045	48.9826	45.014	42.8825	48.9826	0.424016	0.443106	1	0.918978	0.875463	tcf7l1.S	22.3943	25.194	50.6089	49.5823	45.4168	50.6089	0.442497	0.497818	1	0.979715	0.897408
Xelaev18020297m.g	MAT2A.S	25.7147	30.0914	79.0535	67.2361	79.1301	79.1301	0.324968	0.380278	0.999032	0.849691	1	mat2a.S	30.9435	34.3955	61.3973	59.7992	50.6829	61.3973	0.503989	0.560213	1	0.973971	0.825492
Xelaev18020423m.g	SMAD6.S	19.5461	21.5808	57.8848	66.5268	75.3315	75.3315	0.259467	0.286478	0.768401	0.883121	1	smad6.S	29.1981	19.6592	62.9078	63.3333	86.3918	86.3918	0.337973	0.227559	0.728168	0.733094	1
Xelaev18020527m.g	MESDC1.S	28.8346	28.6352	54.3342	58.4025	58.1749	58.4025	0.493722	0.490308	0.930339	1	0.996103	mesdc1.S	42.4539	34.1173	74.0752	87.2105	76.729	87.2105	0.486798	0.391206	0.849384	1	0.879814
Xelaev18020679m.g	CCNB2.S	20.5219	22.0257	58.6676	62.061	62.8319	62.8319	0.326616	0.35055	0.933722	0.987731	1	ccnb2.S	33.1311	22.2006	59.4022	63.7019	64.6773	64.6773	0.512252	0.343252	0.91844	0.984919	1
Xelaev18020839m.g	GOLGB1.S	40.3474	38.5615	88.9578	84.3177	89.2572	89.2572	0.452035	0.432027	0.996645	0.94466	1	golgb1.S	39.9314	37.9019	80.7927	86.795	77.8206	86.795	0.460066	0.436682	0.930845	1	0.896602
Xelaev18020958m.g	GNAI1.S	24.3433	29.5	60.9419	66.8345	68.0165	68.0165	0.357902	0.433718	0.895986	0.982622	1	gnai1.S	36.6769	18.1857	68.6375	65.4189	60.0376	68.6375	0.534357	0.264953	1	0.953108	0.874705
Xelaev18021020m.g	ZBED4.S	13.9167	15.988	31.0504	30.3235	34.1446	34.1446	0.407581	0.468243	0.909379	0.888092	1	zbed4.S	20.1646	23.2432	38.0132	28.6271	41.4933	41.4933	0.485971	0.560168	0.916127	0.689921	1
Xelaev18021022m.g	PIM3.S	37.6963	44.463	96.5728	93.6116	93.9755	96.5728	0.390341	0.460409	1	0.969337	0.973105	pim3.S	56.9278	51.9327	96.3824	95.8795	92.2677	96.3824	0.590646	0.53882	1	0.994782	0.957309
Xelaev18021064m.g	NAA38-LIKE.S	20.0563	17.5665	50.73	65.4485	64.6214	65.4485	0.306443	0.268402	0.775114	1	0.987362	naa38-like.S	46.3815	27.7891	70.1569	81.6813	74.9118	81.6813	0.567835	0.340213	0.85891	1	0.917122
Xelaev18021366m.g	ZNF346.S	23.5724	27.194	53.4876	52.0736	47.3923	53.4876	0.440707	0.508417	1	0.973564	0.886043	znf346.S	28.8293	21.8516	51.2545	54.554	48.453	54.554	0.528454	0.400551	0.93952	1	0.888167
Xelaev18021368m.g	FGFR4.S	14.2252	12.3231	30.3309	31.2385	30.5217	31.2385	0.455372	0.394483	0.970946	1	0.977054	fgfr4.S	18.835	14.0667	36.4727	38.2479	32.1313	38.2479	0.492445	0.367777	0.953589	1	0.840081
Xelaev18021372m.g	MXD3.S	17.6044	19.511	49.6774	45.8656	46.1743	49.6774	0.354374	0.392754	1	0.923268	0.929483	mxd3.S	22.9878	23.0374	36.1479	46.8171	32.8182	46.8171	0.491013	0.492072	0.772109	1	0.700987
Xelaev18021457m.g	ARHGAP26.S	20.6186	21.8235	93.0192	85.4945	71.5143	93.0192	0.221659	0.234613	1	0.919106	0.768812	arhgap26.S	31.4767	28.2529	86.2099	89.2571	53.7881	89.2571	0.352652	0.316533	0.96586	1	0.602619
Xelaev18021511m.g	SPDL1.S	28.5	34.1653	80.9541	69.9169	72.3233	80.9541	0.352051	0.422032	1	0.863661	0.893386	spdl1.S	39.0245	34.0578	63.8396	78.6497	52.6201	78.6497	0.496182	0.433032	0.811695	1	0.669044
Xelaev18021523m.g	HNRNPH1.S	32.0583	30.4188	51.914	81.6443	63.3714	81.6443	0.392658	0.372578	0.635856	1	0.77619	hnrnph1.S	44.5186	34.7441	65.8368	66.5591	63.4229	66.5591	0.668859	0.522004	0.989149	1	0.95288
Xelaev18021532m.g	HNRNPA0.S	33.8237	32.722	78.0126	73.6555	76.2451	78.0126	0.433567	0.419445	1	0.944149	0.977343	hnrnpa0.S	40.1162	37.028	62.7663	67.1621	72.8451	72.8451	0.550706	0.508312	0.861641	0.921985	1
Xelaev18021566m.g	HDAC3.S	22.9	34.0333	82.1957	83.6296	94.3484	94.3484	0.242718	0.36072	0.871193	0.886392	1	hdac3.S	40.398	37.5932	92.3889	90.1736	85.1333	92.3889	0.43726	0.406902	1	0.976022	0.921467
Xelaev18021631m.g	RAVER1.S	13.6575	15.213	63.3837	66.737	69.9214	69.9214	0.195327	0.217572	0.9065	0.954458	1	raver1.S	30.1951	18.3928	61.4852	69.6487	67.5628	69.6487	0.433535	0.26408	0.88279	1	0.970051
Xelaev18021794m.g	ZNF143.L	38.442	40.3665	101.059	102.694	104.166	104.166	0.369046	0.387521	0.970169	0.985872	1	znf143.L	90.6298	51.7297	103.737	108.758	107.762	108.758	0.833319	0.475642	0.953833	1	0.990841
Xelaev18021827m.g	EXT2.L	19.1452	22.2601	72.8608	70.8908	75.8066	75.8066	0.252553	0.293643	0.961141	0.935154	1	ext2.L	33.1746	28.931	85.1085	89.9492	85.4836	89.9492	0.368815	0.321637	0.946184	1	0.950354
Xelaev18021852m.g	PACSIN3.L	38.9619	43.8347	77.5937	72.3161	87.053	87.053	0.447565	0.50354	0.891339	0.830714	1	pacsin3.L	62.405	41.2378	75.6317	86.9383	86.5896	86.9383	0.717808	0.474335	0.869947	1	0.995989
Xelaev18021858m.g	ARFGAP2.L	37.9576	41.5875	87.1468	91.7666	99.3849	99.3849	0.381925	0.418449	0.876861	0.923346	1	arfgap2.L	65.207	52.045	91.7989	88.6954	89.2917	91.7989	0.710324	0.566946	1	0.966193	0.972688
Xelaev18021902m.g	XELAEV18021902M.G	36.8165	46.437	85.9531	99.1621	86.027	99.1621	0.371276	0.468294	0.866795	1	0.86754	Xelaev18021902m.g	49.6443	45.6524	90.2541	87.314	85.2191	90.2541	0.550051	0.505821	1	0.967425	0.944214
Xelaev18021975m.g	IMMP1L.L	23.83	22.2153	74.0304	69.407	74.9885	74.9885	0.317783	0.296249	0.987225	0.92557	1	immp1l.L	32.5663	26.7079	88.9696	94.8268	81.523	94.8268	0.343429	0.281649	0.938232	1	0.859704
Xelaev18022045m.g	PPP6R3.L	18.696	20.65	33.4575	28.1686	37.0938	37.0938	0.50402	0.556698	0.901972	0.759389	1	ppp6r3.L	21.0101	21.9024	35.7681	35.51	42.8421	42.8421	0.490408	0.511236	0.834882	0.828857	1
Xelaev18022134m.g	ZFP36L2.1.L	14.1869	13.9715	33.4057	36.2271	28.6558	36.2271	0.391609	0.385663	0.922117	1	0.791004	zfp36l2.1.L	15.9212	15.628	38.5	27.6667	26.9234	38.5	0.413538	0.405922	1	0.718615	0.69931
Xelaev18022240m.g	LOC100487425-LIKE.L	16.0375	16.8694	37.0503	25.1365	36.1589	37.0503	0.432857	0.455311	1	0.678443	0.975942	loc100487425-like.L	22.2765	19.7007	38.5777	37.4533	30.3474	38.5777	0.577446	0.510676	1	0.970854	0.786657
Xelaev18022277m.g	FIBP.L	18.4386	14.04	55.7273	49.45	54.3898	55.7273	0.330872	0.251941	1	0.887357	0.976	fibp.L	39.3429	17.125	45.6286	62.9194	64.3366	64.3366	0.611516	0.266178	0.709216	0.977971	1
Xelaev18022303m.g	DRAP1.L	23.18	26.3743	48.3758	50.5484	57.8488	57.8488	0.4007	0.455918	0.836245	0.873801	1	drap1.L	30.5898	28.5058	61.4511	57.4541	54.6608	61.4511	0.497791	0.463878	1	0.934956	0.8895
Xelaev18022472m.g	LOC100498440-LIKE.L	22.5427	22.1856	42.344	36.1298	42.2454	42.344	0.532372	0.523937	1	0.853246	0.997671	loc100498440-like.L	23.0383	22.6373	39.4417	42.1106	49.8867	49.8867	0.461812	0.453774	0.790625	0.844124	1
Xelaev18022503m.g	ZDHHC1.L	38.9244	45.0716	79.4358	63.9131	82.3272	82.3272	0.472801	0.547469	0.964879	0.776331	1	zdhhc1.L	43.4715	47.8297	85.5296	85.5425	81.4934	85.5425	0.508186	0.559134	0.999849	1	0.952666
Xelaev18022566m.g	ATMIN.L	37.7216	38.0333	86.6482	84.0459	85.7776	86.6482	0.435342	0.438939	1	0.969967	0.989953	atmin.L	52.3006	42.7437	74.0612	78.4687	71.7936	78.4687	0.666516	0.544723	0.943831	1	0.914933
Xelaev18022762m.g	AKTIP.L	32.7165	29.5703	57.3275	50.2583	51.0154	57.3275	0.570694	0.515814	1	0.876688	0.889894	aktip.L	22.1831	20.018	44.3673	32.234	28.94	44.3673	0.499987	0.451188	1	0.726526	0.652282
Xelaev18022787m.g	UQCRFS1.L	27.1117	28.0286	70.4086	65.2732	75.7319	75.7319	0.357996	0.370104	0.929709	0.861898	1	uqcrfs1.L	37.878	30.3185	62.0051	65.6999	63.787	65.6999	0.57653	0.46147	0.943763	1	0.970884
Xelaev18022815m.g	RARG-LIKE.2.L	28.4851	33.4248	56.625	51.9762	40.5075	56.625	0.503049	0.590283	1	0.917902	0.715364	rarg-like.2.L	27.4937	34.6098	49.8772	61.7692	35.971	61.7692	0.445103	0.560307	0.807476	1	0.582345
Xelaev18022889m.g	SSX2IP.L	14.5102	14.9405	29.4688	31.3909	33.4216	33.4216	0.434155	0.447031	0.881727	0.939239	1	ssx2ip.L	32.8157	19.9081	43.5256	39.9751	38.1575	43.5256	0.753939	0.457387	1	0.918428	0.876668
Xelaev18023002m.g	ATG4C.L	20.7248	20.64	46.0511	51.3254	52.5085	52.5085	0.394695	0.393079	0.877022	0.977468	1	atg4c.L	30.2228	20.1901	42.5421	53.4595	59.325	59.325	0.509444	0.340331	0.717102	0.901129	1
Xelaev18023037m.g	XELAEV18023037M.G	22.1504	22.9032	70.1208	67.0781	68.3595	70.1208	0.315889	0.326625	1	0.956608	0.974883	Xelaev18023037m.g	40.3418	29.6755	85.1684	93.59	82.0764	93.59	0.431048	0.31708	0.910017	1	0.876979
Xelaev18023058m.g	PTPRF.L	28.9078	32.632	70.4642	71.4873	78.979	78.979	0.366019	0.413173	0.892189	0.905143	1	ptprf.L	39.5963	30.0514	56.9631	61.3585	64.9029	64.9029	0.610086	0.463022	0.877667	0.945389	1
Xelaev18023131m.g	CCNB1.2.L	20.9143	22.9003	80.6624	88.267	90.0674	90.0674	0.232207	0.254257	0.895578	0.98001	1	ccnb1.2.L	57.4138	24.1468	96.991	103.222	97.1981	103.222	0.556215	0.23393	0.939633	1	0.941639
Xelaev18023142m.g	STIL.L	16.9016	16.076	61.9317	43.5859	58.9848	61.9317	0.272908	0.259577	1	0.703773	0.952416	stil.L	30.4277	17.146	56.8383	46.1562	44.3851	56.8383	0.535337	0.301662	1	0.812062	0.780901
Xelaev18023321m.g	FNBP1L.L	27.0505	32.2774	58.9098	60.5299	65.2213	65.2213	0.414749	0.494891	0.903229	0.92807	1	fnbp1l.L	30.5739	28.0446	60.3852	52.8696	58.0469	60.3852	0.506314	0.464429	1	0.875538	0.961276
Xelaev18023324m.g	CCDC18.L	24.516	26.7028	76.3692	73.4557	76.8931	76.8931	0.318833	0.347272	0.993186	0.955297	1	ccdc18.L	34.6297	38.8359	88.0884	89.1947	82.9892	89.1947	0.388248	0.435406	0.987597	1	0.930428
Xelaev18023416m.g	HIAT1.L	25.5059	22.6	52.1695	41.9028	48.3623	52.1695	0.488904	0.433203	1	0.803205	0.927023	hiat1.L	20.2316	26.0286	40.3382	34.7581	38.8125	40.3382	0.501548	0.645258	1	0.861665	0.962176
Xelaev18023458m.g	XETROV90012198M.L	22.5548	25.9958	93.0697	81.5358	88.345	93.0697	0.242343	0.279315	1	0.876073	0.949235	Xetrov90012198m.L	56.3808	27.8712	87.9398	94.0254	85.4659	94.0254	0.599634	0.296422	0.935277	1	0.908967
Xelaev18023511m.g	ATF7IP.L	33.3073	25.6366	68.6033	61.505	62.5796	68.6033	0.485505	0.373693	1	0.89653	0.912194	atf7ip.L	38.7682	34.4	47.6089	60.9615	56.9476	60.9615	0.635945	0.56429	0.780966	1	0.934156
Xelaev18023628m.g	LOC101734319.L	34.6154	33.7096	86.5632	67.0667	66.7241	86.5632	0.399886	0.389422	1	0.774771	0.770814	loc101734319.L	41.6651	45.001	82.3355	88.0362	76.8722	88.0362	0.473272	0.511165	0.935245	1	0.873188
Xelaev18023699m.g	CSNK1E.L	23.4479	21.5164	54.0179	50.4677	48.707	54.0179	0.434075	0.398319	1	0.934276	0.901683	csnk1e.L	28.1402	30.5698	43.8129	53.6158	43.4532	53.6158	0.52485	0.570164	0.817163	1	0.810455
Xelaev18023748m.g	LOC100489197-LIKE.L	38.9123	40.3266	94.119	89.2072	88.2779	94.119	0.413437	0.428464	1	0.947813	0.937939	loc100489197-like.L	48.3806	46.6434	92.4096	92.2633	81.0767	92.4096	0.523545	0.504746	1	0.998416	0.877363
Xelaev18023891m.g	POC1A.L	17.2761	17.9356	61.3604	61.605	63.2351	63.2351	0.273205	0.283634	0.970353	0.974221	1	poc1a.L	26.9319	20.4279	88.0871	96.4868	78.9507	96.4868	0.279125	0.211717	0.912945	1	0.818255
Xelaev18023893m.g	LOC100487019.L	22.8861	27.4735	72.4738	74.4992	74.2232	74.4992	0.3072	0.368776	0.972813	1	0.996295	loc100487019.L	38.6432	30.2505	84.3629	83.2944	81.1627	84.3629	0.458059	0.358575	1	0.987334	0.962066
Xelaev18023913m.g	EDEM1.L	30.1456	40.9797	83.6176	79.9133	85.681	85.681	0.351835	0.478282	0.975918	0.932684	1	edem1.L	37.1163	41.2027	65.4324	59.9927	64.4778	65.4324	0.567246	0.629698	1	0.916865	0.98541
Xelaev18023947m.g	TMCC1.L	17.9557	21.3812	49.6746	50.5784	62.7197	62.7197	0.286285	0.340901	0.79201	0.806419	1	tmcc1.L	42.8487	18.6196	49.6557	57.2575	47.2346	57.2575	0.748351	0.325191	0.867234	1	0.82495
Xelaev18024036m.g	PIM1.L	22.2513	20.1911	42.497	37.8206	33.4148	42.497	0.523598	0.475118	1	0.88996	0.786287	pim1.L	23.7725	25.2437	44.8952	53.8938	38.9583	53.8938	0.4411	0.468398	0.833032	1	0.722872
Xelaev18024162m.g	SF1.S	32.9214	38.6554	86.8983	77.4283	89.6042	89.6042	0.36741	0.431402	0.969802	0.864115	1	sf1.S	41.7919	38.5704	75.8638	81.9436	82.9698	82.9698	0.5037	0.464873	0.914354	0.987632	1
Xelaev18024181m.g	DRAP1.S	29.7285	31.0435	71.1721	66.0146	66.5952	71.1721	0.417699	0.436175	1	0.927534	0.935693	drap1.S	31.6468	31.8774	64.2734	70.0156	60.6596	70.0156	0.451996	0.455289	0.917986	1	0.866372
Xelaev18024219m.g	NAA40.S	35.5199	40.8087	101.054	99.658	97.5477	101.054	0.351495	0.40383	1	0.986186	0.965303	naa40.S	57.7759	46.4773	90.929	98.2349	93.37	98.2349	0.58814	0.473124	0.925629	1	0.950477
Xelaev18024267m.g	XELAEV18024267M.G	15	14.7448	38.8639	38.4368	39.8396	39.8396	0.37651	0.370104	0.97551	0.964789	1	Xelaev18024267m.g	18.7717	16.3169	30.7851	32.5962	33.1295	33.1295	0.566615	0.492518	0.929236	0.983904	1
Xelaev18024476m.g	DGKZ.S	13.3866	13.9348	43.1303	55.236	52.5015	55.236	0.242352	0.252277	0.780836	1	0.950494	dgkz.S	24.461	15.088	47.5591	53.7143	58.281	58.281	0.419708	0.258883	0.816031	0.921642	1
Xelaev18024497m.g	PACSIN3.S	43.4811	44.1395	99.601	90.16	95.7453	99.601	0.436553	0.443163	1	0.905211	0.961288	pacsin3.S	55.9711	46.4668	93.1347	95.3242	86.4361	95.3242	0.587166	0.48746	0.977031	1	0.906759
Xelaev18024501m.g	APIP.S	29.2604	35.9742	90.1467	88.442	87.7585	90.1467	0.324587	0.399063	1	0.98109	0.973508	apip.S	43.1983	32.7184	63.2518	71.3958	81.6763	81.6763	0.528897	0.400587	0.774421	0.874132	1
Xelaev18024961m.g	CCNE1.S	17.4439	17.9916	79.6281	78.6012	80.5613	80.5613	0.216529	0.223329	0.988417	0.975669	1	ccne1.S	28.2996	20.0177	97.8186	90.6911	81.6892	97.8186	0.289307	0.204641	1	0.927135	0.83511
Xelaev18025050m.g	GNG5.S	33.3425	33.0185	63.2866	52.8438	63.3601	63.3601	0.526238	0.521124	0.99884	0.834023	1	gng5.S	36.4652	29.8129	72.4215	70.1034	64.4234	72.4215	0.503514	0.411658	1	0.967993	0.889562
Xelaev18025227m.g	PIK3R3.S	25.3598	32.7554	66.2099	68.5184	58.7156	68.5184	0.370117	0.478052	0.966308	1	0.856932	pik3r3.S	31.3485	28.677	56.8772	57.8543	33.6196	57.8543	0.541852	0.495676	0.983111	1	0.581107
Xelaev18025244m.g	CCNB1.2.S	31.3031	34.4181	85.3953	83.2829	85.8012	85.8012	0.364833	0.401138	0.995269	0.970649	1	ccnb1.2.S	64.1786	40.3912	103.162	100.876	92.9744	103.162	0.622114	0.391531	1	0.977843	0.901246
Xelaev18025285m.g	COA7.S	26.836	28.5723	63.9788	55.0314	58.5773	63.9788	0.419451	0.446589	1	0.86015	0.915574	coa7.S	31.1097	31.6942	63.7375	65.5775	60.196	65.5775	0.474395	0.483308	0.971941	1	0.917936
Xelaev18025305m.g	RABGAP1L.S	37.4206	42.4723	94.8189	75.519	78.8304	94.8189	0.394653	0.44793	1	0.796455	0.831379	rabgap1l.S	43.4454	53.7971	74.3313	78.4587	64.8088	78.4587	0.553735	0.685674	0.947394	1	0.826024
Xelaev18025324m.g	RASAL2-LIKE.2.S	25.5031	31.3544	53.9286	56.669	67.96	67.96	0.375266	0.461366	0.793534	0.833858	1	rasal2-like.2.S	28.9451	34.6635	74.7841	72.7848	60.5269	74.7841	0.387048	0.463514	1	0.973266	0.809355
Xelaev18025385m.g	CCDC18.S	28.133	30.9105	85.1791	78.7845	81.179	85.1791	0.33028	0.362888	1	0.924927	0.953039	ccdc18.S	41.1919	47.848	97.3309	97.9674	84.3105	97.9674	0.420465	0.488407	0.993503	1	0.860598
Xelaev18025392m.g	EVI5.S	33.7899	41.5608	94.9901	84.7748	86.0549	94.9901	0.35572	0.437527	1	0.892459	0.905935	evi5.S	47.6692	52.0658	94.1962	91.4443	73.1483	94.1962	0.506063	0.552738	1	0.970785	0.776553
Xelaev18025437m.g	ITPA-LIKE.S	22.8758	27.8307	54.8274	64.2857	75.2149	75.2149	0.30414	0.370016	0.728943	0.854694	1	itpa-like.S	42.7077	21.7619	55.8602	71.5079	61.2	71.5079	0.597244	0.304329	0.781175	1	0.855849
Xelaev18025447m.g	UAP1.S	18.0521	19.7398	44.473	42.7477	46.824	46.824	0.38553	0.421574	0.94979	0.912944	1	uap1.S	19.7361	19.6766	39.7784	53.8256	31.5707	53.8256	0.366667	0.365562	0.739024	1	0.586537
Xelaev18025536m.g	TCF20.S	22.6211	23.8081	57.2273	55.4694	52.9381	57.2273	0.395284	0.416027	1	0.969282	0.925051	tcf20.S	30.0893	33.4429	62.9545	65.5488	60.4795	65.5488	0.459037	0.510198	0.960423	1	0.922663
Xelaev18025661m.g	CBY1.S	26.7747	28.6469	52.3022	47.3452	48.4062	52.3022	0.511924	0.54772	1	0.905225	0.925512	cby1.S	27.0561	31.0058	57.2248	65.3866	58.7797	65.3866	0.413787	0.474191	0.875176	1	0.898955
Xelaev18025701m.g	CSNK1E.S	22.6467	26.2212	50.2353	48.1516	46.6364	50.2353	0.450813	0.521967	1	0.958521	0.928359	csnk1e.S	25.3619	21.3569	49.9704	53.0656	49.3493	53.0656	0.477935	0.402463	0.941673	1	0.929968
Xelaev18025736m.g	LOC100489197-LIKE.S	26.1806	26.751	73.5331	64.6653	63.5142	73.5331	0.356039	0.363796	1	0.879404	0.863749	loc100489197-like.S	32.556	28.5263	53.0142	33.8927	45.4125	53.0142	0.6141	0.538089	1	0.639313	0.856611
Xelaev18025754m.g	DAG1.S	31.8621	32.6099	83.484	66.0363	67.619	83.484	0.381655	0.390613	1	0.791005	0.809964	dag1.S	36.2271	41.6921	77.2162	76	59.8342	77.2162	0.469164	0.53994	1	0.984249	0.774891
Xelaev18025780m.g	IFRD2.S	23.4952	26.4262	54.9404	57.1184	61.3467	61.3467	0.38299	0.430768	0.895571	0.931075	1	ifrd2.S	22.74	22.1373	61.8481	59.1644	38.3333	61.8481	0.367675	0.357929	1	0.956608	0.619798
Xelaev18025951m.g	CIDEC.S	33.2	42.0235	90.0761	76.7627	71.4059	90.0761	0.368577	0.466534	1	0.852199	0.792729	cidec.S	39.4186	62.73	73.5747	69.3814	63.907	73.5747	0.535763	0.852603	1	0.943007	0.8686
Xelaev18026201m.g	DTL.L	17.6289	16.5168	41.1931	38.1089	30.7988	41.1931	0.427958	0.400961	1	0.925128	0.74767	dtl.L	19.5597	17.1206	31.2152	26.0926	24	31.2152	0.626608	0.548471	1	0.835894	0.768856
Xelaev18026391m.g	GTPBP2.L	38.6519	49.0828	87.1307	74.2269	86.9288	87.1307	0.443609	0.563324	1	0.851903	0.997683	gtpbp2.L	45.542	47.0861	81.981	79.987	85.3182	85.3182	0.53379	0.551889	0.960886	0.937514	1
Xelaev18026392m.g	MAD2L1BP-LIKE.L	27.64	26.9586	77.0577	70.5473	81.4702	81.4702	0.339265	0.330901	0.945839	0.865927	1	mad2l1bp-like.L	61.0077	28.0793	82.2561	90.9298	96.6453	96.6453	0.631253	0.29054	0.851113	0.940861	1
Xelaev18026407m.g	XELAEV18026407M.G	17.7254	17.9676	34.9747	29.8793	36.6733	36.6733	0.483331	0.489936	0.953683	0.814742	1	Xelaev18026407m.g	18.2281	18.0404	32.6145	40.5203	41.5464	41.5464	0.438741	0.434223	0.785015	0.975303	1
Xelaev18026427m.g	PTK7.L	25.8651	27.5555	72.2509	68.3271	73.2353	73.2353	0.353178	0.376259	0.986559	0.93298	1	ptk7.L	39.7681	33.924	75.1141	92.2957	77.2997	92.2957	0.430877	0.367557	0.813841	1	0.837522
Xelaev18026503m.g	LOC100491791.L	42.6939	46.8378	92.2477	90.557	92.1009	92.2477	0.462818	0.50774	1	0.981672	0.998409	loc100491791.L	47.6967	58.1682	93.8557	86.8664	66.8524	93.8557	0.508192	0.619762	1	0.925532	0.71229
Xelaev18026526m.g	KIAA1841.L	29.1821	29.8746	80.5512	78.4527	72.8529	80.5512	0.36228	0.370877	1	0.973948	0.90443	kiaa1841.L	39.0609	32.2573	76.2254	81.4159	75.2808	81.4159	0.47977	0.396204	0.936246	1	0.924645
Xelaev18026660m.g	FBXO30.L	26.1923	35.9695	50.7463	55.9636	56.1519	56.1519	0.466455	0.640575	0.903732	0.996647	1	fbxo30.L	35.2935	40.9048	56.6778	67.4394	49.5	67.4394	0.523336	0.606541	0.840425	1	0.733992
Xelaev18026677m.g	RDH13.L	39.343	39.2096	92.64	79.741	80.852	92.64	0.424687	0.423247	1	0.860762	0.872755	rdh13.L	40.0446	52.1053	91.533	93.8846	79.3478	93.8846	0.426529	0.554993	0.974952	1	0.845163
Xelaev18026692m.g	WTAP.L	18.2414	23.3235	73.8026	53.125	61.0192	73.8026	0.247164	0.316026	1	0.719825	0.826789	wtap.L	35.0635	18.5	47.55	58.7432	52.339	58.7432	0.596894	0.31493	0.809455	1	0.890979
Xelaev18026717m.g	TTC13.L	31.7689	37.3406	76.578	70.4539	79.1315	79.1315	0.40147	0.47188	0.967731	0.890339	1	ttc13.L	36.5147	37.4128	71.179	67.6587	63.656	71.179	0.512998	0.525615	1	0.950542	0.894309
Xelaev18026789m.g	AHCTF1.L	30.5556	40.801	91.9695	76.8728	88.1077	91.9695	0.332236	0.443636	1	0.835851	0.95801	ahctf1.L	44.5047	37.2828	83.6151	86.0957	78.0448	86.0957	0.516922	0.433039	0.971188	1	0.906489
Xelaev18027199m.g	CEP57L1.L	35.3176	38.996	73.5141	74.5668	76.7578	76.7578	0.460117	0.508039	0.957741	0.971456	1	cep57l1.L	62.035	41.3409	83.1352	91.7107	84.8138	91.7107	0.67642	0.450775	0.906493	1	0.924796
Xelaev18027302m.g	SYNCRIP.L	18.5137	22.2963	50.2231	30.2025	33.9722	50.2231	0.36863	0.443945	1	0.601367	0.676427	syncrip.L	25.5778	26.8802	44.6667	37.1923	31.3066	44.6667	0.572637	0.601796	1	0.832664	0.700893
Xelaev18027393m.g	SMAP1.L	23.5676	37.7188	53.0092	46.5577	57.9298	57.9298	0.40683	0.651111	0.915058	0.803691	1	smap1.L	26.3689	30.3519	84.9178	53.7547	54.1154	84.9178	0.310523	0.357426	1	0.633021	0.637268
Xelaev18027414m.g	EPHB3.L	21.2014	23.5037	61.3867	63.598	62.4118	63.598	0.333366	0.369566	0.965229	1	0.981347	ephb3.L	32.1193	29.0717	73.4663	62.0365	69.1961	73.4663	0.437198	0.395714	1	0.844422	0.941876
Xelaev18027510m.g	NCBP2.L	27.0988	29.5279	84.9259	86.5274	84.0763	86.5274	0.313181	0.341255	0.981491	1	0.971672	ncbp2.L	44.6423	38.8496	86.4233	90.5644	89.2965	90.5644	0.492935	0.428972	0.954275	1	0.986001
Xelaev18027606m.g	MYNN.L	19.5552	22.9746	42.234	38.0581	55.1176	55.1176	0.35479	0.416828	0.766253	0.690488	1	mynn.L	22.2416	17.6365	38.391	51.2411	50.1895	51.2411	0.434058	0.344187	0.749222	1	0.979477
Xelaev18027711m.g	SERP2.L	29.0206	34.8652	62.6088	59.7071	70.5916	70.5916	0.411106	0.4939	0.886916	0.84581	1	serp2.L	40.7011	32.4429	54.0612	58.8405	68.813	68.813	0.591473	0.471465	0.785625	0.855078	1
Xelaev18027774m.g	SERPINE2.L	28.4536	24.3514	39.9506	44.8441	47.2678	47.2678	0.601967	0.515181	0.845198	0.948725	1	serpine2.L	41.8478	23.721	57.2065	63.6272	62.4017	63.6272	0.657704	0.372812	0.899089	1	0.980739
Xelaev18027888m.g	XELAEV18027888M.G	34.4741	37.4248	69.6698	75.566	83.2249	83.2249	0.414228	0.449683	0.837126	0.907973	1	Xelaev18027888m.g	64.8971	40.2469	81.0057	77.438	90.4727	90.4727	0.717311	0.444851	0.89536	0.855927	1
Xelaev18028098m.g	PUM2.L	19.5357	19.6364	44.5062	36.1278	38.962	44.5062	0.438943	0.441205	1	0.811749	0.87543	pum2.L	22.113	25.2484	45.675	55.1824	47.4839	55.1824	0.400725	0.457544	0.827709	1	0.860489
Xelaev18028227m.g	CTSB.L	34.0575	35.0739	96.3677	100.401	101.117	101.117	0.336811	0.346863	0.953027	0.992911	1	ctsb.L	42.4344	36.552	102.325	104.782	102.436	104.782	0.404978	0.348839	0.976547	1	0.977614
Xelaev18028291m.g	XELAEV18028291M.G	18.4241	19.5652	59.0909	71.2144	75.3213	75.3213	0.244606	0.259756	0.784517	0.945475	1	Xelaev18028291m.g	34.4276	27.9657	81.2313	78.1687	77.1693	81.2313	0.423822	0.344273	1	0.962299	0.949995
Xelaev18028440m.g	PPM1G.L	28.4152	29.9606	49.1587	50.5913	54.6404	54.6404	0.52004	0.548324	0.899677	0.925896	1	ppm1g.L	39.2469	29.1095	43.9792	43.0202	69.6042	69.6042	0.563858	0.418214	0.631847	0.618068	1
Xelaev18028501m.g	SPRED2.S	25.584	36	69.5891	51.9538	63.3	69.5891	0.367644	0.517322	1	0.74658	0.909625	spred2.S	34.2871	39.1872	85.2727	67.2521	46.7917	85.2727	0.402088	0.459551	1	0.788671	0.54873
Xelaev18028513m.g	SNRPB2.S	27.7155	27.7104	59.3172	59.4201	73.1468	73.1468	0.378902	0.378832	0.810934	0.81234	1	snrpb2.S	35.8981	31.8717	76.484	80.3047	83.2514	83.2514	0.431201	0.382836	0.918711	0.964605	1
Xelaev18028537m.g	XELAEV18028537M.G	18.6492	20.1438	28.4309	32.5494	49.5676	49.5676	0.376238	0.406391	0.573579	0.656667	1	Xelaev18028537m.g	22.8524	23.2148	32.2743	47.8568	58.4576	58.4576	0.390922	0.397122	0.552098	0.818657	1
Xelaev18028545m.g	PTK7.S	22.8804	24.3573	77.7415	69.1104	78.3873	78.3873	0.29189	0.31073	0.991762	0.881653	1	ptk7.S	32.6595	29.0479	89.1611	110.684	89.5424	110.684	0.295071	0.26244	0.805549	1	0.808993
Xelaev18028635m.g	SDE2.S	32.1667	33.3841	71.1463	78.7966	95.7922	95.7922	0.335796	0.348506	0.742715	0.822578	1	sde2.S	41.9151	46.6697	59.9351	61.1587	67.2935	67.2935	0.62287	0.693525	0.890652	0.908836	1
Xelaev18028688m.g	ANGEL2.S	20.789	25.8468	88.5528	90.5822	82.6391	90.5822	0.229504	0.285341	0.977596	1	0.912311	angel2.S	37.8391	32.14	101.673	77.1149	74.0759	101.673	0.372163	0.31611	1	0.758457	0.728567
Xelaev18028702m.g	NEK2.S	32.3381	33.2958	69.2737	63.2837	84.0856	84.0856	0.384585	0.395975	0.823848	0.752611	1	nek2.S	33.1534	33.7573	61.7677	59.6228	66.4011	66.4011	0.499289	0.508384	0.930221	0.897918	1
Xelaev18028993m.g	FBXO5.S	17.3358	18.4516	49.6744	45.977	41.4304	49.6744	0.348988	0.371451	1	0.925567	0.834039	fbxo5.S	18.9684	22.4778	32.6788	47.5536	45.8111	47.5536	0.398885	0.472683	0.6872	1	0.963358
Xelaev18029135m.g	SPRTN.S	27.3825	28.8627	71.416	61.8353	70	71.416	0.383423	0.404148	1	0.865847	0.980173	sprtn.S	25.859	37.7664	43.5769	64.9333	42.1753	64.9333	0.398239	0.581617	0.671103	1	0.649516
Xelaev18029349m.g	CST3.S	33.4054	36.195	81.5257	80.8019	82.8347	82.8347	0.403277	0.436954	0.984198	0.97546	1	cst3.S	40.0586	38.7444	78.2193	81.4034	71.3877	81.4034	0.4921	0.475956	0.960886	1	0.876962
Xelaev18029422m.g	IRF6.S	30.7959	31.3976	79.7903	63.6043	63.6508	79.7903	0.385961	0.393501	1	0.797143	0.797726	irf6.S	35.3459	44.9453	84.4804	85.2743	60.0403	85.2743	0.414496	0.527067	0.99069	1	0.704084
Xelaev18029533m.g	EPHB3.S	22.9035	24.0685	68.6596	67.101	72.984	72.984	0.313815	0.329778	0.940748	0.919392	1	ephb3.S	35.2734	28.6551	77.6149	54.4205	74.9567	77.6149	0.454467	0.369195	1	0.70116	0.965751
Xelaev18029850m.g	SERPINE2.S	18.0167	20.9058	41.3656	48.0556	43.3784	48.0556	0.374913	0.435033	0.860787	1	0.902671	serpine2.S	21.631	23.7902	45.6496	56	42.9123	56	0.386267	0.424825	0.815172	1	0.766291
Xelaev18030058m.g	SOX11.S	14.5665	15.3115	32.4406	25.7711	26.7123	32.4406	0.44902	0.471986	1	0.794409	0.823421	sox11.S	18.3759	16.4419	32.5167	32.7826	19.6403	32.7826	0.560538	0.501542	0.991888	1	0.599107
Xelaev18030077m.g	GRHL1.S	15.9567	16.6756	46.4828	49.2992	48.0306	49.2992	0.32367	0.338252	0.94287	1	0.974267	grhl1.S	24.6678	18.3544	44.5077	46.4042	43.9603	46.4042	0.531587	0.395534	0.95913	1	0.947336
Xelaev18030082m.g	ODC1.S	32.5813	31.4115	69.5371	58.8233	72.3415	72.3415	0.450382	0.43421	0.961233	0.813132	1	odc1.S	30.0399	33.5683	60.1812	46.658	51.8784	60.1812	0.499157	0.557787	1	0.775292	0.862036
Xelaev18030190m.g	CTSB.S	28.5212	33.7483	110.351	114.331	117.58	117.58	0.242569	0.287025	0.938523	0.972375	1	ctsb.S	82.5525	38.0729	119.9	124.313	122.265	124.313	0.664071	0.306267	0.964502	1	0.983528
Xelaev18030291m.g	ESCO2.S	36.8192	40.4954	74.5198	62.101	59.693	74.5198	0.494086	0.543418	1	0.83335	0.801036	esco2.S	36.5714	47.0608	72.9425	63.5231	49.359	72.9425	0.501374	0.645177	1	0.870865	0.676684
Xelaev18030531m.g	CDC25A.L	16.1086	17.0894	34.7677	40.5422	58.3808	58.3808	0.275923	0.292723	0.595533	0.694445	1	cdc25a.L	30.0618	15.3947	37.3519	48.3194	63.957	63.957	0.470032	0.240704	0.584016	0.755498	1
Xelaev18030584m.g	GUK1.L	29.4458	36.3288	69.8194	59.9684	76.8182	76.8182	0.383318	0.472919	0.908892	0.780654	1	guk1.L	34.131	32.8456	67.2774	65.1862	61.1778	67.2774	0.507317	0.488212	1	0.968916	0.909336
Xelaev18030630m.g	MYD88.L	20.6186	20.9523	56.6728	50.277	61.1385	61.1385	0.337244	0.342702	0.926958	0.822347	1	myd88.L	39.2647	23.0692	54.5	66.1721	63.6774	66.1721	0.593372	0.348624	0.82361	1	0.9623
Xelaev18030639m.g	CSRNP1.L	14.7145	17.49	29.0072	22.3139	24.7059	29.0072	0.50727	0.602953	1	0.769254	0.851716	csrnp1.L	17.2127	19.2837	34.4329	51.8808	39.9649	51.8808	0.331773	0.371692	0.663692	1	0.77032
Xelaev18030759m.g	ABI1.L	20.37	23.9215	39.4552	35.4015	47.0899	47.0899	0.432577	0.507995	0.83787	0.751786	1	abi1.L	28.7291	21.9461	38.0741	42.5042	51.5551	51.5551	0.557251	0.425682	0.738513	0.824443	1
Xelaev18030760m.g	PDSS1.L	21.1153	24.9634	49.996	42.0411	57.8955	57.8955	0.364715	0.431181	0.863557	0.726156	1	pdss1.L	29.2716	23.7755	43.7679	56.5898	58.295	58.295	0.502129	0.407848	0.7508	0.97075	1
Xelaev18030827m.g	DBF4.L	16.7698	18.1511	54.6183	63.831	67.9155	67.9155	0.246921	0.26726	0.80421	0.939859	1	dbf4.L	31.5073	21.6693	68.7405	79.8637	86.3095	86.3095	0.365051	0.251066	0.796443	0.925318	1
Xelaev18030980m.g	SNX10.L	37.4489	41.179	83.4609	78.7615	80.5698	83.4609	0.4487	0.493393	1	0.943693	0.96536	snx10.L	43.8314	45.2132	80.7061	81.3017	78.9857	81.3017	0.53912	0.556117	0.992674	1	0.971513
Xelaev18031018m.g	FKBP14.L	26.5837	29.0842	85.5982	78.9969	79.4576	85.5982	0.310564	0.339776	1	0.92288	0.928263	fkbp14.L	45.6857	34.5522	68.8403	78.6331	64.449	78.6331	0.580998	0.439411	0.875462	1	0.819616
Xelaev18031038m.g	SGOL1.L	35.9167	35.1241	68.5497	66.0394	74.9235	74.9235	0.479378	0.4688	0.914929	0.881424	1	sgol1.L	33.0548	44.971	85.4286	75.6438	70.4437	85.4286	0.386929	0.526417	1	0.885462	0.824591
Xelaev18031684m.g	JARID2.L	18.9397	24.6093	28.4746	38.1576	49.5517	49.5517	0.382221	0.496639	0.574644	0.770056	1	jarid2.L	22.629	35.1074	50.7778	38.3944	33.6176	50.7778	0.445648	0.691394	1	0.756125	0.662054
Xelaev18031734m.g	GMNN.L	20.8503	25.5368	74.9362	73.8634	78.9787	78.9787	0.263999	0.323338	0.948815	0.935231	1	gmnn.L	45.4387	38.7704	78.2418	77.7806	68.6229	78.2418	0.580747	0.49552	1	0.994106	0.877063
Xelaev18031764m.g	ZNF516.L	18.4356	17.2213	35.3902	29.1654	43.617	43.617	0.422671	0.39483	0.811386	0.668669	1	znf516.L	32.2647	22.375	50.5741	56.6094	41.9545	56.6094	0.569953	0.395253	0.893387	1	0.741124
Xelaev18031821m.g	CEP76.L	30.8169	33.9221	88.8799	85.7128	87.5052	88.8799	0.346726	0.381662	1	0.964366	0.984533	cep76.L	47.8061	38.0107	79.5821	86.8965	81.6204	86.8965	0.55015	0.437425	0.915827	1	0.939283
Xelaev18031890m.g	YES1.L	24.3682	30.9292	50.0647	54.4762	71.7958	71.7958	0.33941	0.430794	0.69732	0.758766	1	yes1.L	48.4288	38.6519	73.625	78.1518	78.1574	78.1574	0.619632	0.494539	0.942009	0.999929	1
Xelaev18032129m.g	ZBTB10.L	24.584	21.3937	61.3278	55.9467	55.1378	61.3278	0.400862	0.348842	1	0.912257	0.899067	zbtb10.L	26.9688	25.4604	54.8113	60.0239	51.4437	60.0239	0.4493	0.424172	0.913158	1	0.857053
Xelaev18032149m.g	LRRCC1.L	31.2811	32.5474	72.5966	73.1842	69.7889	73.1842	0.427429	0.444732	0.991971	1	0.953606	lrrcc1.L	26.8165	35.5453	63.7955	46.2	47.7844	63.7955	0.420352	0.557176	1	0.72419	0.749025
Xelaev18032206m.g	FBXO43-LIKE.L	18.8741	19.1653	43.8394	57.2652	41.0734	57.2652	0.329591	0.334676	0.765551	1	0.717249	fbxo43-like.L	27.8046	16.4556	68.6695	63.3011	69.3359	69.3359	0.401013	0.237331	0.990389	0.912962	1
Xelaev18032311m.g	EXT1.L	39.1452	43.6424	90.2842	81.8164	86.3977	90.2842	0.433577	0.483389	1	0.90621	0.956953	ext1.L	44.7104	49.8974	89.0561	82.7078	83.8651	89.0561	0.502048	0.560291	1	0.928716	0.941711
Xelaev18032325m.g	ENPP2.L	21.0805	24.0595	67.18	60.5072	79.1499	79.1499	0.266336	0.303974	0.848768	0.764463	1	enpp2.L	37.7648	28.9761	44.3997	46.8442	54.1118	54.1118	0.697904	0.535487	0.820519	0.865694	1
Xelaev18032487m.g	LOC100491633.L	32.9588	35.4145	84.6891	91.2763	93.2688	93.2688	0.353374	0.379704	0.908011	0.978636	1	loc100491633.L	38.327	38.2756	80.7235	89.8744	91.7546	91.7546	0.417713	0.417152	0.879776	0.979509	1
Xelaev18032706m.g	RNF121.S	36.1645	38.1353	83.2287	78.8056	86.1199	86.1199	0.419932	0.442816	0.966428	0.915068	1	rnf121.S	58.1131	43.3159	81.9716	77.8922	81.455	81.9716	0.708942	0.528427	1	0.950235	0.993698
Xelaev18032816m.g	GALNT11.S	23.6231	25.312	43.6581	56.7677	51.5067	56.7677	0.416135	0.445888	0.769065	1	0.907323	galnt11.S	26.0108	26.4571	36.5524	52.5135	65.1948	65.1948	0.398971	0.405817	0.560665	0.805486	1
Xelaev18032818m.g	KMT2C.S	19.8299	23.6711	70.819	64.6529	73.5447	73.5447	0.26963	0.321859	0.962938	0.879097	1	kmt2c.S	23.061	28.2862	67.4879	83.233	76.0453	83.233	0.277066	0.339843	0.810832	1	0.913644
Xelaev18033202m.g	CTNNB1.S	28.034	38.8804	58.3532	52.3889	55.4031	58.3532	0.480418	0.666295	1	0.897789	0.949444	ctnnb1.S	25.1761	31.7248	50.7877	43.9822	53.8618	53.8618	0.467419	0.589004	0.942925	0.816575	1
Xelaev18033469m.g	GAD1.2.S	18.7295	20.3887	73.7808	68.7062	72.4039	73.7808	0.253853	0.276342	1	0.931221	0.981339	gad1.2.S	47.952	31.2083	75.7813	90.2892	75.0705	90.2892	0.531094	0.345648	0.839318	1	0.831446
Xelaev18033513m.g	TDP2.S	24.1634	27.79	76.1351	71.8263	68.4262	76.1351	0.317376	0.365008	1	0.943405	0.898747	tdp2.S	43.9614	30.7147	69.7103	69.1254	63.407	69.7103	0.630629	0.440605	1	0.99161	0.909579
Xelaev18033559m.g	RTTN.S	22.0375	28.9279	95.2193	78.6471	67.3176	95.2193	0.231439	0.303803	1	0.825957	0.706975	rttn.S	30.3529	39.0833	103.281	86	44.914	103.281	0.293887	0.378418	1	0.832681	0.434872
Xelaev18033588m.g	VAPA.S	27.9451	31.1197	81.5578	85.1284	77.3053	85.1284	0.32827	0.365563	0.958057	1	0.908103	vapa.S	29.0053	39.1989	89.3413	67.565	71.5583	89.3413	0.324657	0.438754	1	0.756257	0.800953
Xelaev18033697m.g	XELAEV18033697M.G	26.3846	31.8696	53.069	61.4	42.2381	61.4	0.429717	0.519048	0.864315	1	0.687917	Xelaev18033697m.g	39.6875	29.6543	61.9175	73.1429	51.3947	73.1429	0.542603	0.40543	0.846529	1	0.702662
Xelaev18033971m.g	MAL2.S	18.0095	20.284	62.3259	56.269	64.2128	64.2128	0.280466	0.315888	0.970615	0.87629	1	mal2.S	29.067	20.0495	61.4423	65.9199	50.4121	65.9199	0.440945	0.304149	0.932074	1	0.764747
Xelaev18033976m.g	MTBP.S	31.7822	37.4341	73.2288	72.7951	72.3095	73.2288	0.434012	0.511193	1	0.994077	0.987446	mtbp.S	22.5573	31.104	32.6462	44.5645	45.1429	45.1429	0.499686	0.689012	0.723174	0.987189	1
Xelaev18034357m.g	MINPP1-LIKE.1.L	21.7692	29.474	73.5053	70.8424	64.2867	73.5053	0.296159	0.400978	1	0.963773	0.874586	minpp1-like.1.L	37.4078	27.6259	66.9934	79.5516	73.2479	79.5516	0.470234	0.347271	0.842137	1	0.92076
Xelaev18034577m.g	MKI67.L	37.5308	41.4442	71.8667	65.1508	71.9696	71.9696	0.521481	0.575857	0.99857	0.905254	1	mki67.L	39.9877	51.6156	89.5409	87.5274	78.6807	89.5409	0.446586	0.576448	1	0.977513	0.878713
Xelaev18034598m.g	KIF11.L	32.303	34.3368	77.186	79.4435	76.9913	79.4435	0.406616	0.432216	0.971584	1	0.969133	kif11.L	39.4281	42.1402	78.0512	81.3803	65.0686	81.3803	0.484492	0.517818	0.959092	1	0.799563
Xelaev18034644m.g	SLF2.L	33.9236	39.1604	85.9052	73.0839	80.2807	85.9052	0.394895	0.455856	1	0.85075	0.934526	slf2.L	38.0519	39.4932	68.9491	77.5588	68.9789	77.5588	0.49062	0.509204	0.888991	1	0.889375
Xelaev18034673m.g	HPS6.L	26.0103	36.5093	59.2184	69.8049	74.2321	74.2321	0.350391	0.491825	0.797746	0.940359	1	hps6.L	50.3462	32.1065	71.425	66.4317	73.5145	73.5145	0.684847	0.436737	0.971577	0.903654	1
Xelaev18034675m.g	XELAEV18034675M.G	20.4736	25.0041	64.2133	68.9751	58.9061	68.9751	0.296826	0.36251	0.930964	1	0.85402	Xelaev18034675m.g	31.6467	35.969	50.057	57.0734	53.5507	57.0734	0.554491	0.630224	0.877063	1	0.938278
Xelaev18034818m.g	ZFAND4.L	36.2981	43.2123	73.5022	78.0057	85.8583	85.8583	0.422768	0.503298	0.856087	0.90854	1	zfand4.L	38.475	51.1413	82.8896	78.3678	63.9247	82.8896	0.464172	0.616981	1	0.945448	0.771204
Xelaev18034843m.g	XELAEV18034843M.G	33.3149	42.2325	80.6672	68.1285	78.0554	80.6672	0.412992	0.52354	1	0.844563	0.967623	Xelaev18034843m.g	44.4664	47.6053	81.012	77.6479	71.3479	81.012	0.548887	0.587632	1	0.958474	0.880707
Xelaev18034897m.g	CAMK2G.L	33.9429	30.871	62.2333	50.7957	50.117	62.2333	0.545413	0.496052	1	0.816214	0.805308	camk2g.L	34.0169	30.5538	69.1852	74.6641	79	79	0.430594	0.386758	0.875762	0.945115	1
Xelaev18034922m.g	LOC733728.L	38.2158	36.852	72.8879	74.9759	63.0136	74.9759	0.509708	0.491517	0.97215	1	0.840452	loc733728.L	27.1866	41.4358	60.2824	55.3217	46.4362	60.2824	0.450987	0.687363	1	0.91771	0.770312
Xelaev18034956m.g	GLUD1.L	29.7271	35.6649	81.167	58.2518	74.1759	81.167	0.366246	0.439401	1	0.717678	0.913867	glud1.L	45.6771	39.2339	68.6264	67.0182	76.8667	76.8667	0.594238	0.510415	0.892798	0.871875	1
Xelaev18035207m.g	MTHFR.L	24.96	23.759	73.0294	70.6573	84.0873	84.0873	0.296834	0.282552	0.868495	0.840285	1	mthfr.L	38.0531	28.7553	64.451	65.56	74.8382	74.8382	0.508471	0.384233	0.861204	0.876023	1
Xelaev18035406m.g	LOC100487455.L	16.5713	16.2896	46.2996	49.7429	70.1056	70.1056	0.236376	0.232357	0.660427	0.709542	1	loc100487455.L	17.8092	17.3104	51.851	67.9018	65.2163	67.9018	0.262279	0.254933	0.763617	1	0.96045
Xelaev18035407m.g	H2AFX.L	15.5795	15.5054	36.2033	33.6328	47.9573	47.9573	0.324862	0.323317	0.754907	0.701308	1	h2afx.L	17.9124	15.085	42.6586	52.547	76.386	76.386	0.234498	0.197483	0.558462	0.687914	1
Xelaev18035411m.g	PHLDB1.L	24.3788	26.6576	51.2159	39.3545	61.251	61.251	0.398015	0.43522	0.836165	0.642513	1	phldb1.L	24.711	23.6842	74.4286	62.0145	65.8996	74.4286	0.332009	0.318214	1	0.833208	0.885408
Xelaev18035485m.g	BTG4.L	16.5622	16.8953	63.4619	71.4044	77.0517	77.0517	0.214949	0.219272	0.823627	0.926707	1	btg4.L	43.5224	23.0878	82.9188	84.9822	75.6067	84.9822	0.512136	0.271678	0.97572	1	0.889677
Xelaev18035538m.g	USP28.L	38.6774	38.1945	103.63	97.6298	107.588	107.588	0.359497	0.355009	0.963217	0.907445	1	usp28.L	71.2357	45.0483	76.1609	60.1132	71.963	76.1609	0.935332	0.591488	1	0.789292	0.94488
Xelaev18035945m.g	UBE2S.L	32.7953	33.4369	104.833	102.869	102.337	104.833	0.312834	0.318955	1	0.98127	0.976189	ube2s.L	42.0111	41.3047	119.587	119.533	109.965	119.587	0.351302	0.345395	1	0.999548	0.919542
Xelaev18035964m.g	GSK3A.L	17.3689	18.2891	36.7736	37.7625	40.7468	40.7468	0.426263	0.448846	0.902489	0.926759	1	gsk3a.L	21.23	21.0101	40.9846	45.9863	41.129	45.9863	0.461659	0.456877	0.891235	1	0.894376
Xelaev18035965m.g	ERF.L	29.0073	34.4424	67.3444	62.0072	67.5755	67.5755	0.429258	0.509688	0.99658	0.917599	1	erf.L	31.9398	36.9002	60.6364	64.3795	43.2249	64.3795	0.496118	0.573166	0.941858	1	0.671408
Xelaev18036130m.g	KIF18B.L	17.5105	23.3147	77.5565	65.9048	74.2486	77.5565	0.225777	0.300616	1	0.849764	0.957348	kif18b.L	41.7703	19.658	54.5152	50.9901	60.0357	60.0357	0.695757	0.327439	0.908045	0.849329	1
Xelaev18036412m.g	IFFO2.L	18.466	20.5994	51.4602	46.7481	43.4315	51.4602	0.358841	0.400299	1	0.908433	0.843983	iffo2.L	26.8667	22.3841	50.9587	52.2704	42.0551	52.2704	0.513994	0.428236	0.974906	1	0.804568
Xelaev18036460m.g	XELAEV18036460M.G	33.2354	35.2151	75.1551	63.5	72.1341	75.1551	0.442224	0.468566	1	0.844919	0.959804	Xelaev18036460m.g	48.199	34.6797	71.7334	78.8068	76.5763	78.8068	0.61161	0.44006	0.910244	1	0.971697
Xelaev18036605m.g	ADD3.S	56.1408	47.1724	113.341	106.321	111.3	113.341	0.495327	0.416199	1	0.938064	0.981993	add3.S	58.8917	54.3731	95.4545	86.2414	84.8434	95.4545	0.616961	0.569623	1	0.903481	0.888835
Xelaev18036724m.g	NCAPD2.S	15.3341	16.4155	97.794	107.099	111.062	111.062	0.138068	0.147804	0.880534	0.964318	1	ncapd2.S	33.0474	18.3675	106.317	113.034	104.977	113.034	0.292366	0.162495	0.940575	1	0.928718
Xelaev18036872m.g	FOXI2.S	19.6042	21.1763	37.2469	47.2682	52.931	52.931	0.370373	0.400074	0.703688	0.893015	1	foxi2.S	35.1221	19.8024	47.5963	58.4653	65.758	65.758	0.534111	0.30114	0.72381	0.889097	1
Xelaev18036916m.g	CALHM2.S	22.2816	23.4881	85.5262	86.121	87.2513	87.2513	0.255373	0.2692	0.980228	0.987046	1	calhm2.S	33.3385	25.0189	93.2434	95.9824	84.889	95.9824	0.34734	0.260662	0.971463	1	0.884423
Xelaev18036927m.g	XELAEV18036927M.G	20.0339	20.8863	49.4632	41.6667	48.7005	49.4632	0.405027	0.422259	1	0.842377	0.98458	Xelaev18036927m.g	25.6036	26.6319	53.7719	55.116	50.1871	55.116	0.46454	0.483198	0.975614	1	0.910573
Xelaev18037099m.g	DDIT4.S	27.157	36.9628	80.4465	64.6434	67.1334	80.4465	0.337578	0.45947	1	0.803558	0.834511	ddit4.S	25.0163	36.8274	70.5135	66.6915	57.6449	70.5135	0.354774	0.522275	1	0.945799	0.817502
Xelaev18037297m.g	MTHFR.S	30.3852	34.7237	98.4929	92.6673	99.1233	99.1233	0.306539	0.350308	0.99364	0.934869	1	mthfr.S	84.6952	45.1106	99.852	97.7018	95.8343	99.852	0.848207	0.451774	1	0.978466	0.959763
Xelaev18037367m.g	BTG4.S	18.4205	19.0114	88.7395	92.6293	91.4247	92.6293	0.198863	0.205242	0.958007	1	0.986996	btg4.S	28.2681	20.1604	61.3842	55.3556	47.5425	61.3842	0.460511	0.32843	1	0.901789	0.774508
Xelaev18037714m.g	UBE2S.S	27.1538	28.6468	82.6842	77.0303	78.5274	82.6842	0.328403	0.34646	1	0.931621	0.949727	ube2s.S	26.4126	31.6413	75.9783	75.9856	58.9813	75.9856	0.3476	0.416412	0.999904	1	0.776216
Xelaev18037794m.g	AKT1S1.S	23.7923	28.1956	94.2911	94.0257	94.993	94.993	0.250464	0.296818	0.99261	0.989816	1	akt1s1.S	56.7419	30.293	90.4785	92.6698	90.6225	92.6698	0.612302	0.326892	0.976354	1	0.977908
Xelaev18037909m.g	MOB2.2.S	25.7653	26.6559	55.5389	51.356	43.9252	55.5389	0.463914	0.47995	1	0.924686	0.790891	mob2.2.S	23.7778	30.6647	48.0513	53.459	39.8542	53.459	0.444785	0.573611	0.898843	1	0.745509
Xelaev18038075m.g	FBL.S	23.8364	23.3454	45.5578	45.0359	42.3656	45.5578	0.523212	0.512436	1	0.988545	0.929931	fbl.S	30.543	21.7104	52.4195	57.2824	49.3991	57.2824	0.533201	0.379006	0.915107	1	0.862379
Xelaev18038076m.g	LSR-LIKE.1.S	21.1012	23.3956	41.377	37.746	32.7673	41.377	0.509973	0.565425	1	0.912246	0.79192	lsr-like.1.S	30.392	37.7762	73.5489	76.8617	70.5971	76.8617	0.395411	0.491483	0.956899	1	0.918495
Xelaev18038114m.g	SUV39H1.L	15.1958	16.8767	34.3636	51.8532	50.2162	51.8532	0.293054	0.32547	0.66271	1	0.96843	suv39h1.L	17.4872	14.8	36.2449	34.7048	44.7635	44.7635	0.390657	0.330626	0.809697	0.775291	1
Xelaev18038131m.g	CXXC1.L	24.351	28.8195	57.4796	40.2897	74.7891	74.7891	0.325596	0.385343	0.768557	0.538711	1	cxxc1.L	56.3658	28.0952	50.2764	62.7595	81.9136	81.9136	0.688112	0.342986	0.613773	0.766167	1
Xelaev18038191m.g	PRPF4.L	23.645	24.6915	46.1949	38.6135	51.5474	51.5474	0.458703	0.479006	0.896164	0.749087	1	prpf4.L	30.255	27.1244	27.6462	35.4261	52.646	52.646	0.574688	0.515223	0.525133	0.672911	1
Xelaev18038211m.g	EXD3.L	25.3708	28.6186	86.6078	76.2727	85.1316	86.6078	0.292939	0.330438	1	0.880668	0.982955	exd3.L	37.0745	33.2717	77.3472	49.6818	77.8625	77.8625	0.476153	0.427314	0.993382	0.638071	1
Xelaev18038264m.g	XELAEV18038264M.G	41.4596	48.241	102.752	82.1955	93.1598	102.752	0.403491	0.469489	1	0.799939	0.906646	Xelaev18038264m.g	54.5732	42.7143	87.4256	76.8592	69.779	87.4256	0.624224	0.488578	1	0.879137	0.798153
Xelaev18038517m.g	KLF8.L	35.3938	40.7827	85.9052	75.0538	74.0081	85.9052	0.412009	0.47474	1	0.873681	0.861509	klf8.L	45.1121	46.7269	80.7682	77.3247	65.8612	80.7682	0.558538	0.578531	1	0.957366	0.815435
Xelaev18038524m.g	HDAC8.L	32.0983	34.8073	91.972	92.8276	90.3295	92.8276	0.345784	0.374967	0.990783	1	0.973089	hdac8.L	53.8539	40.0275	94.743	97.1646	85.1552	97.1646	0.554255	0.411956	0.975078	1	0.876402
Xelaev18038541m.g	TAF7.L	30.0445	30.0504	62.717	46.3726	58.2025	62.717	0.479049	0.479142	1	0.739395	0.928017	taf7.L	43.7455	39.7905	80.5083	67.2279	63.0651	80.5083	0.543366	0.494241	1	0.835043	0.783336
Xelaev18038662m.g	MED12.L	25.6984	34.5455	93.8556	86.8218	85.9698	93.8556	0.273808	0.36807	1	0.925058	0.91598	med12.L	58.6154	49.5362	94.2658	93.8317	81.1194	94.2658	0.62181	0.525495	1	0.995395	0.860539
Xelaev18038663m.g	LOC100493164-LIKE.L	43.4429	44.3483	100.155	99.6145	103.052	103.052	0.421565	0.430351	0.971892	0.966647	1	loc100493164-like.L	73.9919	50.8531	100.265	103.932	107.274	107.274	0.689748	0.474049	0.934664	0.96885	1
Xelaev18038736m.g	LOC100489393.L	17.3485	16.623	27.7407	31.3537	34.7573	34.7573	0.499134	0.478258	0.798127	0.902075	1	loc100489393.L	19.0917	15.2889	20.0385	20.1235	29.642	29.642	0.644075	0.515785	0.676016	0.678884	1
Xelaev18038799m.g	XELAEV18038799M.G	33.5143	36.3789	72.1862	76.1836	84.7796	84.7796	0.395311	0.429099	0.851457	0.898608	1	Xelaev18038799m.g	53.4865	34.0187	67.6069	77.3273	67.8924	77.3273	0.69169	0.439931	0.874296	1	0.877987
Xelaev18038842m.g	SOX3.L	22.5194	24.7239	53.0769	50.7032	50.7995	53.0769	0.424279	0.465812	1	0.955277	0.957092	sox3.L	29.5731	30.8313	57.5705	55.9199	53.8025	57.5705	0.513686	0.535541	1	0.97133	0.93455
Xelaev18038952m.g	LOC100495369.L	30.2645	32.6647	65.6346	67.2179	74.1732	74.1732	0.408024	0.440384	0.884882	0.906228	1	loc100495369.L	41.2213	31.9873	68.5387	76.3434	81.3754	81.3754	0.506556	0.393083	0.842253	0.938162	1
Xelaev18038999m.g	GPC4.L	23.2121	27.0905	58.9471	65.6981	67.726	67.726	0.342736	0.400001	0.870376	0.970057	1	gpc4.L	43.7626	27.3362	70.7209	69.1167	65.7602	70.7209	0.618807	0.386537	1	0.977316	0.929855
Xelaev18039013m.g	XELAEV18039013M.G	24.4	23.7536	72.8571	73.5063	89.0556	89.0556	0.273986	0.266728	0.818109	0.825399	1	Xelaev18039013m.g	32.6897	34.2252	87.3551	58.9231	85.1098	87.3551	0.374216	0.391793	1	0.674523	0.974297
Xelaev18039015m.g	DDX26B.L	16.0976	16.7155	78.3299	91.6856	81.8046	91.6856	0.175574	0.182313	0.854332	1	0.89223	ddx26b.L	21.0045	24.152	101.916	101.826	61.4077	101.916	0.206097	0.23698	1	0.999123	0.602535
Xelaev18039040m.g	ATP11C.L	30.1575	28.2289	59.2823	59.7153	54.6418	59.7153	0.505022	0.472724	0.992749	1	0.915039	atp11c.L	39.9487	31.9493	63.7119	64.8005	56.6154	64.8005	0.616488	0.493041	0.983202	1	0.873688
Xelaev18039095m.g	POLR2I.L	32.1832	38.5935	102.329	105.631	111.974	111.974	0.287417	0.344665	0.913868	0.943353	1	polr2i.L	76.789	42.0682	105.967	116.216	112.051	116.216	0.660745	0.361983	0.911814	1	0.964162
Xelaev18039222m.g	TUBB.L	21.1207	25	50.5846	48.7083	49.7875	50.5846	0.417532	0.494221	1	0.962908	0.984242	tubb.L	21.6964	26.7037	53.0222	56.2727	38.9821	56.2727	0.385559	0.474541	0.942237	1	0.692736
Xelaev18039234m.g	NRM.L	28.1837	37.321	95.3236	94.0431	97.5818	97.5818	0.288822	0.382459	0.976859	0.963736	1	nrm.L	75.7096	39.9153	93.577	95.3097	91.7722	95.3097	0.794354	0.418796	0.98182	1	0.962884
Xelaev18039280m.g	XETROV90020936M.L	25.8584	26.7249	86.39	77.0239	79.7179	86.39	0.299321	0.309351	1	0.891583	0.922767	Xetrov90020936m.L	77.4017	40.7321	91.1813	71.2	69.0358	91.1813	0.848876	0.446715	1	0.780862	0.757126
Xelaev18039797m.g	TRMT5.L	28.0827	28.2073	56.5819	56.8271	65.2809	65.2809	0.430183	0.432092	0.866746	0.870502	1	trmt5.L	45.5899	33.5914	71.162	73.0088	71.6437	73.0088	0.624444	0.460101	0.974703	1	0.981302
Xelaev18039799m.g	MNAT1.L	31.763	33.4182	75.3397	75.0942	80.2983	80.2983	0.395562	0.416176	0.938248	0.935191	1	mnat1.L	51.3968	34.003	65.1445	75.3842	83.625	83.625	0.614611	0.406613	0.779007	0.901455	1
Xelaev18039817m.g	DACT1.L	31.4535	32.1349	78.3281	58.1701	56.3762	78.3281	0.401561	0.41026	1	0.742646	0.719745	dact1.L	28.9314	35.7143	49.0123	48.8986	47.075	49.0123	0.590287	0.728679	1	0.997678	0.960472
Xelaev18039982m.g	ARHGAP11A.1.L	17.4231	27	45.619	45.6825	37.5946	45.6825	0.381395	0.591035	0.99861	1	0.822953	arhgap11a.1.L	22.7143	18.3947	36.4615	41.0714	35.225	41.0714	0.553043	0.447872	0.887759	1	0.857652
Xelaev18040520m.g	XELAEV18040520M.G	22.8242	26.9499	46.975	45.5098	45.4685	46.975	0.48588	0.573706	1	0.968809	0.96793	Xelaev18040520m.g	23.0536	28.3758	54.4067	50.1075	41.3208	54.4067	0.423727	0.52155	1	0.920981	0.75948
Xelaev18040638m.g	VANGL2.L	41.9159	41.4821	92.0317	86.2626	66.9091	92.0317	0.45545	0.450737	1	0.937314	0.727022	vangl2.L	50.048	59.0405	67.1579	103.538	77.1034	103.538	0.483376	0.570228	0.648628	1	0.744684
Xelaev18040923m.g	EFNA1.L	40.7432	51.6862	94.0469	90.087	94.9276	94.9276	0.429203	0.54448	0.990722	0.949007	1	efna1.L	37.5767	46.1513	90.7194	99.3925	87.1065	99.3925	0.378064	0.464334	0.912739	1	0.876389
Xelaev18041051m.g	ZNF106.S	21.5396	24.1553	44.2689	37.5484	38.8249	44.2689	0.486562	0.545649	1	0.848189	0.877025	znf106.S	27.1917	37.8125	69.4966	75.6286	41.2261	75.6286	0.359542	0.499976	0.91892	1	0.545113
Xelaev18041202m.g	SLC25A29.S	22.9172	24.529	57.5631	51.6264	48.6899	57.5631	0.398123	0.426123	1	0.896866	0.845853	slc25a29.S	26.5123	27.9718	47.6404	47.8651	43.4484	47.8651	0.553896	0.584388	0.995306	1	0.907726
Xelaev18041203m.g	YY1.S	22.8755	24.481	57.1621	51.1796	48.6872	57.1621	0.400187	0.428274	1	0.895343	0.851741	yy1.S	25.9242	27.6867	46.3827	47.3497	40.4189	47.3497	0.547505	0.584729	0.979577	1	0.853626
Xelaev18041224m.g	CNIH1.S	32.2537	37.6784	82.0618	83.8108	90.0368	90.0368	0.358228	0.418478	0.911426	0.930851	1	cnih1.S	52.0099	44.518	85.7401	79.016	85.3533	85.7401	0.606599	0.519221	1	0.921576	0.995489
Xelaev18041273m.g	VRK1.S	28.0306	31.1096	77.9462	77.6818	80.1807	80.1807	0.349592	0.387993	0.972132	0.968833	1	vrk1.S	48.9774	35.0766	73.7591	77.3792	74.023	77.3792	0.632953	0.453308	0.953216	1	0.956627
Xelaev18041346m.g	SEL1L.S	36.5535	39.0803	82.1146	78.1479	75.1241	82.1146	0.445152	0.475923	1	0.951692	0.914868	sel1l.S	44.8408	38.3306	75.0658	75.6547	51.375	75.6547	0.592704	0.506652	0.992215	1	0.679072
Xelaev18041349m.g	GTF2A1.S	20.0803	21.8134	53.4685	51.2318	49.8642	53.4685	0.375554	0.407967	1	0.958168	0.932591	gtf2a1.S	28.0362	26.5596	50.5049	39.9616	36.3393	50.5049	0.555118	0.525882	1	0.791243	0.719521
Xelaev18041390m.g	CXXC1.S	24.9308	26.4022	45.5642	43.8588	66.2579	66.2579	0.37627	0.398476	0.68768	0.661942	1	cxxc1.S	55.0276	24.2462	55.0117	71.2731	79.609	79.609	0.691223	0.304566	0.691023	0.895289	1
Xelaev18041486m.g	ARRDC1.S	31.9062	36.6816	80.2072	78.0993	81.9038	81.9038	0.389557	0.447862	0.979285	0.953549	1	arrdc1.S	43.9412	37.0294	56.9829	78.4539	70.0331	78.4539	0.560089	0.471989	0.726323	1	0.892665
Xelaev18041536m.g	NOTCH1.S	20.779	25.1534	47.9385	44.8047	48.4899	48.4899	0.428522	0.518734	0.988628	0.923999	1	notch1.S	28.7065	37.2011	63.5445	56.6957	52.9694	63.5445	0.451754	0.585434	1	0.892219	0.833579
Xelaev18041544m.g	MRPS2.S	44.5775	43.7265	94.769	87.5569	88.743	94.769	0.470381	0.4614	1	0.923897	0.936414	mrps2.S	46.2081	52.4477	91.2121	85.2723	74.9824	91.2121	0.5066	0.575009	1	0.934879	0.822066
Xelaev18041563m.g	WDR5.S	20.3274	20.26	52.7268	47.343	52.1453	52.7268	0.385522	0.384244	1	0.897892	0.98897	wdr5.S	31.2	25.3902	37.583	51	41.096	51	0.611765	0.497846	0.736922	1	0.805804
Xelaev18042120m.g	XELAEV18042120M.G	26.9556	31.8032	48.6783	52.9908	59.3593	59.3593	0.45411	0.535775	0.820062	0.892713	1	Xelaev18042120m.g	38.6628	34.9201	59.817	57.7566	71.7976	71.7976	0.538497	0.486369	0.833134	0.804436	1
Xelaev18042169m.g	SOX3.S	17.7063	20.5647	65.9545	66.5456	77.2971	77.2971	0.229067	0.266047	0.85326	0.860906	1	sox3.S	31.8531	29.0435	67.1602	79.7261	67.2264	79.7261	0.399531	0.364291	0.842386	1	0.843217
Xelaev18042276m.g	SYTL4.S	16.2727	20.0256	41.3551	27.4918	33.0396	41.3551	0.393487	0.484236	1	0.664774	0.798924	sytl4.S	21.5513	17.4576	34.6364	30.5368	24.3875	34.6364	0.622215	0.504026	1	0.881639	0.704101
Xelaev18042306m.g	XELAEV18042306M.G	36.481	42.1992	87.6876	85.7775	86.341	87.6876	0.416034	0.481245	1	0.978217	0.984643	Xelaev18042306m.g	44.3039	43.1579	91.5827	94.8481	79.3711	94.8481	0.467103	0.455021	0.965572	1	0.836823
Xelaev18042313m.g	GPC4.S	33.2874	41.2697	87.8052	65.964	73.5328	87.8052	0.379105	0.470014	1	0.751254	0.837454	gpc4.S	52.7391	35.7944	71.6538	73.89	71.3968	73.89	0.713752	0.484428	0.969737	1	0.966259
Xelaev18042389m.g	POLR2I.S	31.6352	36.222	98.8313	101.916	109.159	109.159	0.289809	0.331828	0.90539	0.933644	1	polr2i.S	83.015	44.1668	105.273	111.939	111.28	111.939	0.741609	0.394561	0.940448	1	0.994113
Xelaev18042391m.g	LOC100487930.S	22.469	18.6188	44.7573	42.9563	46.1894	46.1894	0.486453	0.403097	0.968996	0.930003	1	loc100487930.S	27.3074	21.4754	52.0979	54.0174	59.8571	59.8571	0.45621	0.358777	0.870371	0.902439	1
Xelaev18042475m.g	TUBB.S	21.3346	26.0104	55.585	46.0478	53.1098	55.585	0.383819	0.467939	1	0.828422	0.95547	tubb.S	21.6723	26.2526	47.1029	41.4016	43.2812	47.1029	0.460104	0.557346	1	0.878961	0.918865
Xelaev18042507m.g	XETROV90020936M.S	28.0327	27.9055	97.0988	91.8826	86.0916	97.0988	0.288702	0.287392	1	0.946279	0.88664	Xetrov90020936m.S	39.3726	34.5758	95.9474	92.129	82.6044	95.9474	0.410357	0.360362	1	0.960204	0.860934
Xelaev18042517m.g	AKT2.S	39.7218	45.3235	78.4141	51.0576	59.2609	78.4141	0.506564	0.578002	1	0.651127	0.755742	akt2.S	38.6923	41.0891	86.6316	80.3365	72.8833	86.6316	0.446631	0.474297	1	0.927335	0.841302
Xelaev18042524m.g	SERTAD3.S	20.6496	24.6765	47.2881	47.5	43.5542	47.5	0.434729	0.519505	0.99554	1	0.916931	sertad3.S	26.6944	27.4909	52.6408	52.6364	50.8105	52.6408	0.507106	0.522236	1	0.999916	0.965231
Xelaev18042532m.g	SNRPA.S	18.2963	17.9198	31.18	35.8492	45.5776	45.5776	0.401431	0.393171	0.684107	0.786553	1	snrpa.S	16.8813	17.2833	25.4311	28.1458	28.2294	28.2294	0.598005	0.612246	0.900874	0.99704	1
Xelaev18042800m.g	VANGL2.S	25.3559	29.1939	59.2111	59.35	58.7347	59.35	0.427227	0.491895	0.99766	1	0.989633	vangl2.S	42.0709	29.4296	58.2364	56.8529	75.6526	75.6526	0.556106	0.38901	0.769786	0.7515	1
Xelaev18043012m.g	EFNA1.S	40.7181	50.7412	86.4353	87.9494	93.9683	93.9683	0.433317	0.539982	0.919835	0.935948	1	efna1.S	42.2816	55.3081	104.122	104.566	105.777	105.777	0.399725	0.522876	0.984355	0.988551	1
Xelaev18043144m.g	CDC6.L	23.5	28.4545	82.2071	76.3089	76.2445	82.2071	0.285864	0.346133	1	0.928252	0.927469	cdc6.L	86.2646	49.7521	85.0044	80.3924	68.2045	86.2646	1	0.576738	0.985391	0.931928	0.790643
Xelaev18043187m.g	LASP1.L	36.2282	42.8327	89.2201	84.0611	85.9978	89.2201	0.406055	0.480078	1	0.942177	0.963883	lasp1.L	51.0676	53.6336	88.9913	95.6166	86.2023	95.6166	0.534088	0.560924	0.93071	1	0.901541
Xelaev18043191m.g	CWC25.L	24.4535	28.7696	64.4323	53.7747	69.6036	69.6036	0.351325	0.413335	0.925704	0.772585	1	cwc25.L	31.4572	22.973	50.8575	41.0621	55.675	55.675	0.565014	0.412626	0.91347	0.737531	1
Xelaev18043284m.g	SLC4A1.L	15.4074	17.2188	73.9077	38.3896	58.0571	73.9077	0.208468	0.232976	1	0.519426	0.785536	slc4a1.L	49.6122	17.0385	69.9268	55.7671	89.1707	89.1707	0.556374	0.191077	0.78419	0.625397	1
Xelaev18043419m.g	XELAEV18043419M.G	26.1035	26.9008	54.4	52.0485	53.8609	54.4	0.479844	0.4945	1	0.956775	0.99009	Xelaev18043419m.g	25.9592	28.5873	54.4496	49.3688	46.3238	54.4496	0.476755	0.525022	1	0.906687	0.850764
Xelaev18043762m.g	XELAEV18043762M.G	22.1507	25.0653	48.2201	49.0199	50.382	50.382	0.439654	0.497505	0.957089	0.972965	1	Xelaev18043762m.g	31.7338	25.2425	52.1322	61.6559	54.9088	61.6559	0.514692	0.409409	0.845533	1	0.890567
Xelaev18043893m.g	SNRPB.L	27.4135	29.7325	67.774	70.0424	72.1106	72.1106	0.380159	0.412317	0.939861	0.971319	1	snrpb.L	36.9208	26.861	48.7632	49.474	47.6706	49.474	0.746267	0.542931	0.985631	1	0.963548
Xelaev18044329m.g	ESYT3.L	23.9432	33.48	94.441	91.3458	85.1289	94.441	0.253525	0.354507	1	0.967227	0.901398	esyt3.L	41.4382	33.4468	73.0932	69.7314	92.3308	92.3308	0.448801	0.36225	0.791645	0.755235	1
Xelaev18044330m.g	CEP70.L	32.8076	36.4575	81.8437	78.4528	76.2563	81.8437	0.400857	0.445453	1	0.958569	0.931731	cep70.L	48.1343	37.8221	77.8504	76.7175	73.9883	77.8504	0.618292	0.485831	1	0.985448	0.950391
Xelaev18044472m.g	STK16.L	32.3893	28.2065	63.589	45.7458	59.3095	63.589	0.509353	0.443575	1	0.719397	0.9327	stk16.L	47.9216	32.1099	55.2981	53.431	67.604	67.604	0.708857	0.474971	0.817971	0.790354	1
Xelaev18044814m.g	HDAC4.L	24.2532	25.6667	52.2125	42.6809	48.7619	52.2125	0.46451	0.491581	1	0.817445	0.933912	hdac4.L	33.6753	20.7544	49.7914	55.2615	33.9823	55.2615	0.609381	0.375567	0.901014	1	0.614936
Xelaev18044972m.g	CCNYL1.L	26.7547	30.3837	57.9143	57.5988	65.1309	65.1309	0.410784	0.466502	0.889198	0.884355	1	ccnyl1.L	36.9059	34.8037	61.7531	62.3704	68.5691	68.5691	0.538229	0.507571	0.900597	0.909599	1
Xelaev18045064m.g	CPSF4.L	27.5623	27.1845	81.4674	77.2099	82.87	82.87	0.332596	0.328038	0.983075	0.931699	1	cpsf4.L	49.9394	33.5044	80.98	91.5014	74.7161	91.5014	0.545778	0.366163	0.885014	1	0.816558
Xelaev18045067m.g	BUD31.L	39.1105	42.5271	93.5256	94.8485	99.4514	99.4514	0.393263	0.427617	0.940416	0.953718	1	bud31.L	62.2413	48.2324	102.431	107.821	98.7286	107.821	0.577267	0.447339	0.950012	1	0.915674
Xelaev18045134m.g	ATF7IP2.L	18.4128	25.5299	82.8115	82.0094	90.4135	90.4135	0.203651	0.282368	0.91592	0.907048	1	atf7ip2.L	29.119	24.6505	73.304	78.4066	68.3636	78.4066	0.371385	0.314394	0.934921	1	0.871912
Xelaev18045168m.g	CPPED1.L	27.5	29.0719	79.0114	72.3209	80.1538	80.1538	0.34309	0.362702	0.985746	0.902276	1	cpped1.L	40.2121	26.402	71.679	74.7895	81.803	81.803	0.491573	0.322751	0.876239	0.914263	1
Xelaev18045191m.g	LOC100491090.L	32.0637	33.3497	76.4932	82.1291	84.2423	84.2423	0.380613	0.395878	0.908013	0.974914	1	loc100491090.L	62.5695	44.0938	88.3384	95.0265	91.5972	95.0265	0.658443	0.464016	0.929618	1	0.963912
Xelaev18045247m.g	ZFAND2A.L	28.5272	29.5894	76.1914	74.7242	71.8779	76.1914	0.374415	0.388356	1	0.980744	0.943386	zfand2a.L	48.6686	31.9942	85.726	86.291	81.6649	86.291	0.564006	0.370771	0.993453	1	0.946389
Xelaev18045386m.g	LOC100487982-LIKE.L	33.3827	35.5825	80.2557	69.4885	78.5563	80.2557	0.415954	0.443364	1	0.865839	0.978825	loc100487982-like.L	38.0249	38.9123	67.8927	65.9412	55.8275	67.8927	0.560073	0.573144	1	0.971256	0.822289
Xelaev18045424m.g	ERN2.L	18.6325	22.9504	72.8786	82.9808	95.3648	95.3648	0.195381	0.240659	0.764208	0.870141	1	ern2.L	26.1333	21.0852	77.913	89.175	75.5455	89.175	0.293057	0.236448	0.873709	1	0.84716
Xelaev18045435m.g	XPO6.L	23.5642	27.4353	108.862	109.963	115.867	115.867	0.203373	0.236783	0.939544	0.949044	1	xpo6.L	51.8814	36.1179	111.705	108.534	114.772	114.772	0.45204	0.314694	0.973283	0.945649	1
Xelaev18045560m.g	TOP3A.L	33.1285	37.5646	73.1118	73.2769	80.8535	80.8535	0.409735	0.4646	0.90425	0.906292	1	top3a.L	42.6158	40.8436	84.7461	82.8643	80.3477	84.7461	0.502864	0.481952	1	0.977795	0.948098
Xelaev18045594m.g	WDR90.L	18.8461	20.1208	55.4488	63.4178	63.8695	63.8695	0.295072	0.31503	0.868158	0.992927	1	wdr90.L	29.1157	22.7901	54.5575	53.2021	56.6148	56.6148	0.514277	0.402546	0.963661	0.939721	1
Xelaev18045607m.g	GLYR1.L	14.6206	15.5044	44.1642	52.2342	61.1582	61.1582	0.239062	0.253513	0.722131	0.854084	1	glyr1.L	33.2098	17.5414	52.7963	59.1175	70.1353	70.1353	0.47351	0.250109	0.752778	0.842908	1
Xelaev18045675m.g	CLDN6.2.L	26.8643	27.5122	57.5483	59.4265	60.7341	60.7341	0.442327	0.452994	0.947545	0.978471	1	cldn6.2.L	32.4173	31.4265	60.8571	59.5433	51.175	60.8571	0.532678	0.516398	1	0.97841	0.840903
Xelaev18045913m.g	NR1D1.S	42.3993	35.2679	101.569	79.8405	87.4367	101.569	0.417442	0.34723	1	0.78607	0.860858	nr1d1.S	48.6322	44.1741	68.8784	69.86	54.775	69.86	0.696138	0.632323	0.985949	1	0.784068
Xelaev18045943m.g	XELAEV18045943M.G	36.485	36.9244	112.041	118.812	121.174	121.174	0.301096	0.304722	0.924633	0.980508	1	Xelaev18045943m.g	58.0636	37.1501	121.687	123.835	123.632	123.835	0.46888	0.299997	0.982659	1	0.998366
Xelaev18046013m.g	ZNF281.S	31.4553	27.582	56.4124	49.0256	54.79	56.4124	0.557596	0.488935	1	0.869058	0.971241	znf281.S	34.3168	29.6562	58.25	59.6289	47	59.6289	0.575507	0.497347	0.976876	1	0.788209
Xelaev18046205m.g	AURKA.S	36.6925	33.7844	79.8169	79.2575	70.6382	79.8169	0.459708	0.423274	1	0.992992	0.885003	aurka.S	18.7174	26.1224	45.5469	65.4182	43.7255	65.4182	0.286119	0.399315	0.696242	1	0.6684
Xelaev18046210m.g	TFAP2C.S	13.0884	12.883	29.4192	23.3559	20.341	29.4192	0.444893	0.43791	1	0.793899	0.691421	tfap2c.S	13.2735	17.2277	30.4503	31.1518	24.6453	31.1518	0.426089	0.553022	0.977481	1	0.791135
Xelaev18046219m.g	XELAEV18046219M.G	23.8288	25.6692	71.365	71.8938	75.1891	75.1891	0.316918	0.341395	0.94914	0.956172	1	Xelaev18046219m.g	29.7862	24.3896	77.5856	81.8692	69.0939	81.8692	0.363826	0.297909	0.947677	1	0.843954
Xelaev18046238m.g	TAF4.S	16.2157	18.3659	47.1868	54.2166	54.7333	54.7333	0.296267	0.335552	0.862122	0.990558	1	taf4.S	20.4032	21.7253	50.4333	50.7727	57.8577	57.8577	0.352645	0.375495	0.87168	0.877546	1
Xelaev18046284m.g	PPP4R1L.S	16.845	16.3639	33.0278	22.3679	39.4779	39.4779	0.426694	0.414507	0.836613	0.566593	1	ppp4r1l.S	25.1603	18.2178	38.6552	39.141	44.141	44.141	0.569998	0.412718	0.87572	0.886727	1
Xelaev18046310m.g	ARFGAP1.S	32.6629	35.448	80.5391	75.0768	91.6917	91.6917	0.356225	0.3866	0.878369	0.818796	1	arfgap1.S	52.0246	45.6143	76.8459	81.3201	82.996	82.996	0.626833	0.549597	0.9259	0.979808	1
Xelaev18046338m.g	PRPF6.S	21.3	20.2667	35.7059	42.6942	43.0103	43.0103	0.49523	0.471205	0.83017	0.992651	1	prpf6.S	29.5214	20.3793	37.9483	34.2338	45.6032	45.6032	0.647353	0.446884	0.832141	0.750688	1
Xelaev18046454m.g	BAHCC1.S	23.4581	27.2851	73.331	49.9235	41.6626	73.331	0.319893	0.372081	1	0.680796	0.568144	bahcc1.S	27.6899	34.2083	77.1708	60.6792	32.6208	77.1708	0.358813	0.44328	1	0.786297	0.422709
Xelaev18046501m.g	PSME3.S	25.8658	27.4147	51.2257	52.625	56.2252	56.2252	0.460039	0.487587	0.91108	0.935968	1	psme3.S	42.9857	31.9501	62.3679	64.1401	65.003	65.003	0.661288	0.491518	0.959462	0.986725	1
Xelaev18046555m.g	SNRPB.S	29.9254	30.659	78.7866	77.6943	84.5027	84.5027	0.354136	0.362817	0.932357	0.919429	1	snrpb.S	36.5525	30.5788	67.0311	64.2739	67.291	67.291	0.5432	0.454426	0.996137	0.955162	1
Xelaev18046861m.g	HELZ.S	17.6725	20.5	47.6522	32.3545	40.5354	47.6522	0.370864	0.430201	1	0.678972	0.850652	helz.S	28.8047	22.8519	41.4138	40.726	29.7778	41.4138	0.695535	0.551793	1	0.983393	0.71903
Xelaev18047247m.g	NUP35.S	28.8485	29.5794	73.102	64.2763	92	92	0.31357	0.321515	0.794587	0.698656	1	nup35.S	26.2639	34.9429	75.0345	55.7949	55.5227	75.0345	0.350024	0.465691	1	0.74359	0.739963
Xelaev18047294m.g	FN1.S	32.8403	32.4167	70.1674	71.186	63.5509	71.186	0.461331	0.45538	0.985692	1	0.892745	fn1.S	74.2566	23.9794	73.6519	69.2378	62.814	74.2566	1	0.322926	0.991855	0.932412	0.845904
Xelaev18047371m.g	XELAEV18047371M.G	36.4548	36.4948	100.975	89.7196	87.0326	100.975	0.361029	0.361425	1	0.888536	0.861925	Xelaev18047371m.g	34.7925	47.316	81.54	69.7752	57.759	81.54	0.426692	0.580279	1	0.855717	0.708352
Xelaev18047439m.g	CPSF4.S	25.3668	25.636	62.6688	61.1397	67.5871	67.5871	0.375319	0.379304	0.92723	0.904607	1	cpsf4.S	28.6981	27.0773	60.9806	76.6329	58.1649	76.6329	0.374488	0.353338	0.795749	1	0.759007
Xelaev18047441m.g	BUD31.S	38.4739	41.9023	96.079	97.4496	101.772	101.772	0.378041	0.411728	0.944062	0.957529	1	bud31.S	62.3788	48.3166	102.71	108.227	99.9644	108.227	0.576372	0.446439	0.949028	1	0.923658
Xelaev18047679m.g	XELAEV18047679M.G	25.1277	26.9835	62.8773	60.3237	66.7399	66.7399	0.376503	0.404309	0.942125	0.903862	1	Xelaev18047679m.g	31.2992	31.7266	61.5851	66.5288	59.3048	66.5288	0.470461	0.476885	0.92569	1	0.891415
Xelaev18047693m.g	ERN2.S	19.5432	20.7756	91.5921	93.2939	98.278	98.278	0.198856	0.211396	0.931969	0.949285	1	ern2.S	40.8764	22.9174	108.03	109.224	104.002	109.224	0.374245	0.20982	0.989069	1	0.95219
Xelaev18047702m.g	XELAEV18047702M.G	22.7337	23.7479	101.81	84.8828	100.389	101.81	0.223296	0.233257	1	0.83374	0.986044	Xelaev18047702m.g	35.9053	28.67	98.6361	114.118	94.3984	114.118	0.314634	0.251231	0.864335	1	0.827201
Xelaev18047778m.g	NARFL.S	22.4338	22.3952	41.5187	49.7291	47.4428	49.7291	0.451122	0.450345	0.834898	1	0.954026	narfl.S	25.8697	23.2198	39.9034	45.5324	43.7591	45.5324	0.568161	0.509963	0.876374	1	0.961056
Xelaev18047830m.g	GLYR1.S	14.8177	18.7807	44.3068	39.1029	53.5833	53.5833	0.276536	0.350496	0.826877	0.729759	1	glyr1.S	29.6224	16.422	41.1329	49.9646	64.2604	64.2604	0.460974	0.255554	0.640097	0.777533	1
Xelaev18047886m.g	CLDN6.2.S	35.1752	32.4799	84.1691	81.8271	79.1623	84.1691	0.417911	0.385888	1	0.972175	0.940515	cldn6.2.S	39.4761	40.5239	83.1098	86.2206	79.9149	86.2206	0.45785	0.470002	0.96392	1	0.926865

## Sheet: Transcription
Human Uniprot Accession #	Gene Description
Q9UHB7	AF4/FMR2 family member 4(AFF4)
Q99856	AT-rich interaction domain 3A(ARID3A)
O43313	ATM interactor(ATMIN)
A6H8Y1	B double prime 1, subunit of RNA polymerase III transcription initiation factor IIIB(BDP1)
Q9P0U4	CXXC finger protein 1(CXXC1)
Q14919	DR1 associated protein 1(DRAP1)
P15036	ETS proto-oncogene 2, transcription factor(ETS2)
P41162	ETS variant 3(ETV3)
P50548	ETS2 repressor factor(ERF)
Q14678	KN motif and ankyrin repeat domains 1(KANK1)
O95600	Kruppel like factor 8(KLF8)
Q9BW11	MAX dimerization protein 3(MXD3)
Q99583	MAX network transcriptional repressor(MNT)
P51948	MNAT1, CDK activating kinase assembly factor(MNAT1)
Q9BTK6	PAXIP1 associated glutamate rich protein 1(PAGR1)
Q9Y2S0	RNA polymerase I subunit D(POLR1D)
P36954	RNA polymerase II subunit I(POLR2I)
O43541	SMAD family member 6(SMAD6)
P35716	SRY-box 11(SOX11)
P41225	SRY-box 3(SOX3)
O00422	Sin3A associated protein 18(SAP18)
Q92750	TATA-box binding protein associated factor 4b(TAF4B)
Q15545	TATA-box binding protein associated factor 7(TAF7)
Q8NFZ5	TNFAIP3 interacting protein 2(TNIP2)
P61964	WD repeat domain 5(WDR5)
P25490	YY1 transcription factor(YY1)
Q5U623	activating transcription factor 7 interacting protein 2(ATF7IP2)
O15392	baculoviral IAP repeat containing 5(BIRC5)
O60885	bromodomain containing 4(BRD4)
P35222	catenin beta 1(CTNNB1)
Q96AQ7	cell death inducing DFFA like effector c(CIDEC)
Q9BWT1	cell division cycle associated 7(CDCA7)
Q96S65	cysteine and serine rich nuclear protein 1(CSRNP1)
O75460	endoplasmic reticulum to nucleus signaling 1(ERN1)
Q9UK61	family with sequence similarity 208 member A(FAM208A)
Q12951	forkhead box I1(FOXI1)
P52655	general transcription factor IIA subunit 1(GTF2A1)
Q9NZI5	grainyhead like transcription factor 1(GRHL1)
P61978	heterogeneous nuclear ribonucleoprotein K(HNRNPK)
O15379	histone deacetylase 3(HDAC3)
P56524	histone deacetylase 4(HDAC4)
Q9BY41	histone deacetylase 8(HDAC8)
Q8IX15	homeobox and leucine zipper encoding(HOMEZ)
O14896	interferon regulatory factor 6(IRF6)
Q92833	jumonji and AT-rich interaction domain containing 2(JARID2)
Q92794	lysine acetyltransferase 6A(KAT6A)
Q9H7Z6	lysine acetyltransferase 8(KAT8)
Q6ZMT4	lysine demethylase 7A(KDM7A)
Q9UMN6	lysine methyltransferase 2B(KMT2B)
Q8NEZ4	lysine methyltransferase 2C(KMT2C)
Q9NQR1	lysine methyltransferase 5A(KMT5A)
Q93074	mediator complex subunit 12(MED12)
Q9UHV7	mediator complex subunit 13(MED13)
Q9NPC7	myoneurin(MYNN)
Q9UBE8	nemo like kinase(NLK)
P46531	notch 1(NOTCH1)
P20393	nuclear receptor subfamily 1 group D member 1(NR1D1)
O15534	period circadian clock 1(PER1)
Q13131	protein kinase AMP-activated catalytic subunit alpha 1(PRKAA1)
Q9Y2V3	retina and anterior neural fold homeobox(RAX)
Q15637	splicing factor 1(SF1)
Q9HD15	steroid receptor RNA activator 1(SRA1)
O43463	suppressor of variegation 3-9 homolog 1(SUV39H1)
Q9H5I1	suppressor of variegation 3-9 homolog 2(SUV39H2)
Q9UGU0	transcription factor 20(TCF20)
P15923	transcription factor 3(TCF3)
Q9HCS4	transcription factor 7 like 1(TCF7L1)
Q92754	transcription factor AP-2 gamma(TFAP2C)
Q8IXH6	tumor protein p53 inducible nuclear protein 2(TP53INP2)
Q14119	vascular endothelial zinc finger 1(VEZF1)
Q96DT7	zinc finger and BTB domain containing 10(ZBTB10)
P52747	zinc finger protein 143(ZNF143)
Q9Y2X9	zinc finger protein 281(ZNF281)
Q96RE9	zinc finger protein 300(ZNF300)
Q92618	zinc finger protein 516(ZNF516)

## Sheet: Mitosis
Human Uniprot Accession #	Gene Description
Q8WYP5	AT-hook containing transcription factor 1(AHCTF1)
Q9UBU7	DBF4 zinc finger(DBF4)
Q9UKT4	F-box protein 5(FBXO5)
P63096	G protein subunit alpha i1(GNAI1)
P16104	H2A histone family member X(H2AFX)
Q9Y6X3	MAU2 sister chromatid cohesion factor(MAU2)
Q96DY7	MDM2 binding protein(MTBP)
P51948	MNAT1, CDK activating kinase assembly factor(MNAT1)
O14777	NDC80, kinetochore complex component(NDC80)
P51955	NIMA related kinase 2(NEK2)
Q9NTI5	PDS5 cohesin associated factor B(PDS5B)
P11309	Pim-1 proto-oncogene, serine/threonine kinase(PIM1)
Q86V86	Pim-3 proto-oncogene, serine/threonine kinase(PIM3)
Q9Y3P9	RAB GTPase activating protein 1(RABGAP1)
Q15007	Wilms tumor 1 associated protein(WTAP)
Q9UM13	anaphase promoting complex subunit 10(ANAPC10)
O14965	aurora kinase A(AURKA)
O15392	baculoviral IAP repeat containing 5(BIRC5)
P30304	cell division cycle 25A(CDC25A)
O75419	cell division cycle 45(CDC45)
Q99741	cell division cycle 6(CDC6)
Q9BWT1	cell division cycle associated 7(CDCA7)
Q9HAW4	claspin(CLSPN)
P78396	cyclin A1(CCNA1)
P14635	cyclin B1(CCNB1)
O95067	cyclin B2(CCNB2)
P24864	cyclin E1(CCNE1)
P55273	cyclin dependent kinase inhibitor 2D(CDKN2D)
Q56NI9	establishment of sister chromatid cohesion N-acetyltransferase 2(ESCO2)
Q9Y421	family with sequence similarity 32 member A(FAM32A)
O75496	geminin, DNA replication inhibitor(GMNN)
P52732	kinesin family member 11(KIF11)
Q86Y91	kinesin family member 18B(KIF18B)
Q9C099	leucine rich repeat and coiled-coil centrosomal protein 1(LRRCC1)
Q9NQR1	lysine methyltransferase 5A(KMT5A)
P46013	marker of proliferation Ki-67(MKI67)
Q15021	non-SMC condensin I complex subunit D2(NCAPD2)
O95997	pituitary tumor-transforming 1(PTTG1)
P61289	proteasome activator subunit 3(PSME3)
P18754	regulator of chromosome condensation 1(RCC1)
Q9P0V9	septin 10(SEPT10)
Q5FBB7	shugoshin 1(SGO1)
Q96EA4	spindle apparatus coiled-coil protein 1(SPDL1)
O43463	suppressor of variegation 3-9 homolog 1(SUV39H1)
Q9H5I1	suppressor of variegation 3-9 homolog 2(SUV39H2)
Q16763	ubiquitin conjugating enzyme E2 S(UBE2S)
Q99986	vaccinia related kinase 1(VRK1)
