# Supplementary material
Source: HighWire-hosted journal article supplement (doi:10.1101/rna.073247.119)
Supplement: Supplemental_Table_S4.xlsx [file Supplemental_Table_S4.xlsx]

## Sheet: PolyadenylationDecreases
Transcript	Name.x	noPG1_meanPolyA	PG901_meanPolyA	MI1_meanPolyA	Inter1_meanPolyA	MII1_meanPolyA	max.x	noPGnorm.x	PG90norm.x	MInorm.x	Internorm.x	MIInorm.x	Name.y	noPG2_meanPolyA	PG902_meanPolyA	MI2_meanPolyA	Inter2_meanPolyA	MII2_meanPolyA	max.y	noPGnorm.y	PG90norm.y	MInorm.y	Internorm.y	MIInorm.y
Xelaev18000562m.g	VDAC2.S	65.9641	72.3425	50.8021	33.2747	25.129	72.3425	0.91183	1	0.702244	0.459961	0.347362	vdac2.S	62.9685	64.9452	59.44	32.0745	17.8243	64.9452	0.969564	1	0.915233	0.49387	0.274452
Xelaev18000572m.g	ADK.S	83.8305	80.9869	59.0112	46.7796	33.8921	83.8305	1	0.966079	0.703935	0.558027	0.404293	adk.S	85.7229	86.9193	76.644	65.8481	47.0899	86.9193	0.986236	1	0.881784	0.757577	0.541766
Xelaev18000936m.g	LOC394444.S	55.5043	58.6405	40.4767	28.2819	24.7272	58.6405	0.946518	1	0.690252	0.482292	0.421674	loc394444.S	67.2492	56.3458	39.4098	30.1053	23.0461	67.2492	1	0.837866	0.586026	0.447668	0.342697
Xelaev18000954m.g	FIS1.S	36.2471	41.0824	27.4794	20.1676	18.6114	41.0824	0.882302	1	0.668885	0.490905	0.453027	fis1.S	31.9322	37.4357	26.7395	18.3585	17.9863	37.4357	0.852987	1	0.714277	0.4904	0.480458
Xelaev18001164m.g	GTPBP3.S	75.9013	75.9344	57.8644	37.9204	28.5323	75.9344	0.999565	1	0.762032	0.499383	0.375749	gtpbp3.S	76.7326	76.8777	60.9777	53.2296	42.1374	76.8777	0.998112	1	0.793177	0.692394	0.54811
Xelaev18001502m.g	XELAEV18001502M.G	53.399	54.7386	45.7881	35.2273	30.84	54.7386	0.975527	1	0.836487	0.643555	0.563405	Xelaev18001502m.g	66.5125	61.2849	48.4464	31.3854	26.375	66.5125	1	0.921404	0.728381	0.471872	0.396542
Xelaev18001739m.g	NDUFA13.1.L	65.9216	62.1221	41.1135	27.8514	23.3688	65.9216	1	0.942364	0.623673	0.422492	0.354494	ndufa13.1.L	69.2857	70.0703	46.1416	44.8902	26.9706	70.0703	0.988803	1	0.658505	0.640646	0.384908
Xelaev18001802m.g	TKT.L	57.8841	62.0374	49.5421	30.8779	28.0074	62.0374	0.933051	1	0.798584	0.497729	0.45146	tkt.L	65.565	63.8697	45.9042	46.016	32.033	65.565	1	0.974144	0.700132	0.701837	0.488568
Xelaev18002485m.g	FBXO7.L	43.1744	45.2587	34.2357	27.8141	20.1523	45.2587	0.953949	1	0.756445	0.614558	0.445269	fbxo7.L	43.7143	38.9634	30.3027	24.5363	20.6201	43.7143	1	0.89132	0.693199	0.561287	0.471702
Xelaev18002816m.g	LOC100488028-LIKE.L	63.9657	63.7162	47.3245	36.8174	27.7244	63.9657	1	0.9961	0.739842	0.57558	0.433426	loc100488028-like.L	68.504	61.1824	46.9027	52.8304	32.4681	68.504	1	0.893122	0.684671	0.771201	0.473959
Xelaev18003377m.g	CDIP1.L	35.8131	45.1652	28.9379	20.034	20.9402	45.1652	0.792935	1	0.640713	0.443571	0.463635	cdip1.L	54.4512	42.6927	29.9204	23.2084	20.6695	54.4512	1	0.784054	0.54949	0.426224	0.379597
Xelaev18003594m.g	LOC100498624.L	54.8702	51.9712	44.5496	34.1195	29.1387	54.8702	1	0.947167	0.811908	0.621821	0.531047	loc100498624.L	47.6917	49.7473	30.453	29.3393	20.44	49.7473	0.958681	1	0.612154	0.589767	0.410877
Xelaev18003802m.g	VLDLR.S	45.7188	52.2455	44.4375	30.2327	21.6522	52.2455	0.875075	1	0.850552	0.578666	0.414431	vldlr.S	38.8175	48.5085	31.952	26.2519	24.9697	48.5085	0.800221	1	0.658689	0.541181	0.514749
Xelaev18003848m.g	CCT5.S	46.212	49.595	29.2081	20.8211	19.2171	49.595	0.931789	1	0.588933	0.419823	0.387481	cct5.S	61.2145	48.6864	31.1599	31.8039	25.8037	61.2145	1	0.79534	0.509027	0.519548	0.42153
Xelaev18004402m.g	VPS11.S	30.2281	31.7224	25.2095	18.474	16.4847	31.7224	0.952894	1	0.794689	0.582364	0.519653	vps11.S	41.8936	31.3119	24.7229	20.9914	18.2879	41.8936	1	0.747415	0.590135	0.501065	0.436531
Xelaev18004408m.g	CCDC84.S	38.257	35.3696	33.1364	23.7967	19.0513	38.257	1	0.924526	0.866152	0.622022	0.497982	ccdc84.S	52.6219	40.5673	33.1543	27.0237	24.9049	52.6219	1	0.770921	0.630047	0.513545	0.473281
Xelaev18004591m.g	XELAEV18004591M.G	65.15	69.9798	50.6703	31.5602	29.4891	69.9798	0.930983	1	0.724071	0.450991	0.421395	Xelaev18004591m.g	76.378	66.9855	45.2967	38.8976	33.7576	76.378	1	0.877026	0.593059	0.509277	0.44198
Xelaev18004807m.g	SUCLG1.L	55.6622	58.9184	40.5952	27.3421	22.5797	58.9184	0.944733	1	0.689007	0.464067	0.383236	suclg1.L	62.4005	58.3892	42.5719	35.2697	25.9488	62.4005	1	0.935717	0.682236	0.565214	0.415843
Xelaev18004894m.g	DCTN1.L	36.969	40.0944	26.9249	19.4063	15.2324	40.0944	0.922048	1	0.671539	0.484015	0.379912	dctn1.L	46.7269	38.8362	28.3225	20.3567	15.7106	46.7269	1	0.831132	0.606129	0.435653	0.336222
Xelaev18004907m.g	CCT7.L	44.4001	47.0507	31.6996	21.3654	19.0291	47.0507	0.943666	1	0.673733	0.454094	0.404438	cct7.L	55.2909	43.4282	29.7442	24.1401	19.5271	55.2909	1	0.78545	0.537959	0.436602	0.35317
Xelaev18004920m.g	XELAEV18004920M.G	54.2	65.834	48.0957	34.0805	28.9079	65.834	0.823283	1	0.73056	0.517674	0.439103	Xelaev18004920m.g	57.8623	61.7314	48.8786	40.4239	31.5714	61.7314	0.937323	1	0.791795	0.654836	0.511432
Xelaev18005062m.g	XELAEV18005062M.G	68.67	74.9562	49.7582	34.6678	31.944	74.9562	0.916134	1	0.66383	0.462507	0.426169	Xelaev18005062m.g	83.8907	76.5233	52.753	42.7219	28.2455	83.8907	1	0.912179	0.62883	0.509257	0.336695
Xelaev18005114m.g	STX18.L	32.056	35.0179	28.4943	24.5468	17.4089	35.0179	0.915419	1	0.813707	0.700978	0.497142	stx18.L	40.1178	35.0669	33.2705	23.2227	17.3573	40.1178	1	0.874098	0.82932	0.578862	0.43266
Xelaev18005697m.g	AIMP1.L	37.5646	38.2734	24.1006	19.4903	17.1745	38.2734	0.981479	1	0.629695	0.509237	0.448732	aimp1.L	44.0961	39.6793	27.4405	22.858	17.2886	44.0961	1	0.899837	0.622289	0.518367	0.392068
Xelaev18005716m.g	BDH2.L	57.3063	61.2373	41.6761	28.6792	27.6171	61.2373	0.935807	1	0.680567	0.468329	0.450986	bdh2.L	66.8512	56.4655	42.2645	32.4609	27.0068	66.8512	1	0.844644	0.632218	0.48557	0.403984
Xelaev18005748m.g	ADH5.L	65.0195	62.185	46.6003	33.6	29.3715	65.0195	1	0.956405	0.716713	0.516768	0.451734	adh5.L	58.1429	57.4883	40.9404	29.6544	17.5476	58.1429	1	0.988743	0.704135	0.510027	0.301802
Xelaev18005871m.g	ANXA3.L	39.3398	41.4544	32.3775	25.491	21.5765	41.4544	0.948989	1	0.781038	0.614918	0.520488	anxa3.L	45.8195	38.3088	32.8637	25.4286	16.6393	45.8195	1	0.83608	0.717242	0.554973	0.36315
Xelaev18006082m.g	EEF2.1.L	76.5057	76.3744	54.9098	36.805	36.8113	76.5057	1	0.998284	0.717722	0.481075	0.481158	eef2.1.L	83.3135	77.642	54.5596	43.7366	41.2334	83.3135	1	0.931925	0.654871	0.524963	0.494919
Xelaev18006241m.g	ATP5D.L	67.6348	73.5214	51.0149	36.3412	34.2086	73.5214	0.919934	1	0.693879	0.494295	0.465288	atp5d.L	77.3187	75.5609	57.8419	47.4735	38.9213	77.3187	1	0.977265	0.748096	0.613997	0.503387
Xelaev18006488m.g	ADH6.L	49.2938	52.9038	45.8824	26.4336	22.5125	52.9038	0.931762	1	0.867278	0.499653	0.425536	adh6.L	53.137	52.4314	35.1655	28.1871	26.3766	53.137	1	0.986721	0.661789	0.530461	0.496389
Xelaev18006576m.g	CCDC124.L	38.3132	38.4345	30.2716	20.2432	18.5708	38.4345	0.996843	1	0.787613	0.526694	0.483179	ccdc124.L	48.301	41.7644	32.1789	22.7532	17.2778	48.301	1	0.864671	0.666217	0.471072	0.357711
Xelaev18006631m.g	XELAEV18006631M.G	61.2028	63.8524	52.6675	38.3488	31.9518	63.8524	0.958505	1	0.824833	0.600586	0.500401	Xelaev18006631m.g	69.6696	74.957	59.3001	47.3533	30.6891	74.957	0.929461	1	0.791122	0.631739	0.409422
Xelaev18006732m.g	FOCAD.L	53.1037	49.7561	32.5969	30.431	25.0568	53.1037	1	0.936961	0.613835	0.573049	0.471847	focad.L	57.2537	52.7693	40.0095	30.0507	19.3288	57.2537	1	0.921676	0.698811	0.52487	0.337599
Xelaev18006735m.g	HACD4.L	55.4722	47.6833	36.3065	29.3402	25.4286	55.4722	1	0.859589	0.654498	0.528917	0.458402	hacd4.L	58.5534	53.8812	40.2951	31.0671	21.6433	58.5534	1	0.920206	0.688178	0.530578	0.369633
Xelaev18007005m.g	RABGGTA.L	33.8043	36.7951	28.2585	20.3174	20.3503	36.7951	0.918716	1	0.767996	0.552175	0.553069	rabggta.L	49.9528	32.788	25.4513	20.5718	19.05	49.9528	1	0.65638	0.509506	0.411825	0.38136
Xelaev18007046m.g	MRPL52.L	51.0349	53.1232	39.7079	28.1495	26.1868	53.1232	0.96069	1	0.747468	0.529892	0.492945	mrpl52.L	52.1729	50.3862	41.2709	32.7844	23.8206	52.1729	1	0.965754	0.791041	0.628379	0.456569
Xelaev18007059m.g	PSMB5.L	52.7441	52.1141	39.9636	28.132	24.2664	52.7441	1	0.988055	0.757689	0.533368	0.460078	psmb5.L	65.2746	62.5456	49.2231	39.422	29.5574	65.2746	1	0.958192	0.754093	0.60394	0.452816
Xelaev18007817m.g	PSMD9.L	57.5112	50.6481	43.4467	32.724	25.6731	57.5112	1	0.880665	0.755448	0.569002	0.446401	psmd9.L	53.876	54.517	44.3265	36.5345	26.8817	54.517	0.988241	1	0.813077	0.670148	0.493089
Xelaev18007973m.g	HSD17B4.L	52.4439	49.1277	35.6549	29.6546	22.8392	52.4439	1	0.936766	0.679868	0.565454	0.435497	hsd17b4.L	56.3688	50.2911	41.2	25.8194	18.7333	56.3688	1	0.89218	0.7309	0.458045	0.332335
Xelaev18008163m.g	NSA2.L	57.9545	62.8983	44.4858	32.3932	29.1723	62.8983	0.9214	1	0.707265	0.515009	0.463801	nsa2.L	63.4535	62.1504	45.512	27.3095	24.6304	63.4535	1	0.979465	0.717251	0.430387	0.388165
Xelaev18008273m.g	DDX4.L	53.7779	53.0895	37.7404	25.7501	24.2509	53.7779	1	0.987199	0.701783	0.478824	0.450945	ddx4.L	56.4522	55.8886	39.892	31.0454	19.274	56.4522	1	0.990017	0.706651	0.549941	0.341422
Xelaev18008331m.g	OXCT1.L	72.9681	77.5109	53.4256	38.4664	32.25	77.5109	0.941391	1	0.689266	0.496271	0.416071	oxct1.L	75.6974	77.9494	59.0667	41.9558	17.8387	77.9494	0.971109	1	0.757756	0.538243	0.22885
Xelaev18008612m.g	TMEM8B.L	38.5732	43.4609	31.7972	23.6757	22.1034	43.4609	0.88754	1	0.731628	0.544758	0.508583	tmem8b.L	53.6287	38.7362	29.6404	25.4656	20.8333	53.6287	1	0.722304	0.552698	0.474851	0.388474
Xelaev18008826m.g	SUCLG1.S	58.7485	62.3032	47.4818	32.0467	31.187	62.3032	0.942945	1	0.762108	0.514366	0.500568	suclg1.S	67.399	60.0505	45.9361	34.8222	26.1608	67.399	1	0.890971	0.681555	0.516658	0.388149
Xelaev18008925m.g	STX18.S	35.9463	38.2321	28.3759	22.7068	17.0976	38.2321	0.940212	1	0.7422	0.593919	0.447204	stx18.S	34.0561	35.2332	26.087	24.2429	16.1739	35.2332	0.96659	1	0.740408	0.688069	0.459053
Xelaev18009272m.g	ZNF330.S	35.7446	39.3451	23.5896	18.0399	16.7067	39.3451	0.908489	1	0.599556	0.458504	0.424619	znf330.S	46.7494	36.5695	25.7035	21.0375	17.1399	46.7494	1	0.782245	0.549814	0.450005	0.366634
Xelaev18009454m.g	HPGDS.S	49.3636	51.2999	38.2412	26.1795	22.038	51.2999	0.962257	1	0.745445	0.510323	0.429591	hpgds.S	60.8841	57.2145	45.661	36.5567	25.9583	60.8841	1	0.939728	0.749966	0.60043	0.426356
Xelaev18009660m.g	PLIN3.S	39.5328	42.5552	29.644	21.2057	21.2442	42.5552	0.928978	1	0.696601	0.498311	0.499214	plin3.S	47.7269	39.4826	30.8134	24.0283	17.7289	47.7269	1	0.827261	0.64562	0.503455	0.371465
Xelaev18009693m.g	XETROV90001378M.S	82.1344	88.2993	66.2324	49.2296	37.7429	88.2993	0.930182	1	0.75009	0.557531	0.427442	Xetrov90001378m.S	83.0383	96.4214	76.1266	60.1099	37.2614	96.4214	0.861202	1	0.78952	0.623408	0.386443
Xelaev18009694m.g	FNTA.S	42.6124	45.5329	30.6913	22.5998	21.1469	45.5329	0.935859	1	0.674045	0.496339	0.464431	fnta.S	54.0607	43.871	31.0274	26.1539	21.4378	54.0607	1	0.811513	0.573936	0.483788	0.39655
Xelaev18009849m.g	LOC100495756-LIKE.S	48.581	48.8548	37.2059	27.4971	23.0514	48.8548	0.994396	1	0.761561	0.562834	0.471835	loc100495756-like.S	52.5474	51.0487	42.2833	32.8035	24.3076	52.5474	1	0.97148	0.804671	0.624265	0.462584
Xelaev18009932m.g	HIATL1.S	33.0943	37.7194	28.5357	20.6282	16.9643	37.7194	0.877382	1	0.756527	0.546886	0.44975	hiatl1.S	43.0462	33.5611	26.4877	22.1786	17.033	43.0462	1	0.779652	0.61533	0.515227	0.39569
Xelaev18010450m.g	RPLP0.S	69.4005	72.093	51.9443	37.9052	34.0474	72.093	0.962652	1	0.720518	0.525782	0.47227	rplp0.S	67.127	67.1634	48.4288	40.5687	30.9294	67.1634	0.999459	1	0.721059	0.60403	0.460509
Xelaev18010736m.g	XELAEV18010736M.G	31.4468	33.3991	24.6088	17.5044	17.1275	33.3991	0.941545	1	0.73681	0.524099	0.512812	Xelaev18010736m.g	40.5952	36.7169	28.8199	22.2397	16.1014	40.5952	1	0.904464	0.709932	0.547839	0.396634
Xelaev18010737m.g	PHAX.S	30.8259	32.0792	23.8235	17.0851	16.3333	32.0792	0.960933	1	0.742648	0.532592	0.509157	phax.S	35.9342	35.7265	26.655	24.7939	14.3253	35.9342	1	0.994221	0.741772	0.68998	0.398654
Xelaev18010803m.g	RIOK2.S	48.3592	48.8781	36.6673	25.4174	21.4803	48.8781	0.989383	1	0.750178	0.520015	0.439467	riok2.S	52.9708	49.3405	32.4635	28.3872	24.1409	52.9708	1	0.931465	0.612856	0.535902	0.45574
Xelaev18010884m.g	NSA2.S	55.8264	60.8049	43.8732	33.1752	29.6381	60.8049	0.918123	1	0.72154	0.5456	0.487429	nsa2.S	63.9692	60.8541	47.4164	31.6937	19.0149	63.9692	1	0.951304	0.741238	0.495453	0.297251
Xelaev18011128m.g	ATP5A1.S	60.5323	62.8419	42.5475	30.5258	25.8078	62.8419	0.963247	1	0.677056	0.485756	0.410677	atp5a1.S	66.3073	61.7412	46.7052	36.694	31.0625	66.3073	1	0.931139	0.704375	0.553393	0.468463
Xelaev18011223m.g	AGPAT3.L	36.7708	44.1603	39.1675	22.749	23.5234	44.1603	0.832667	1	0.886939	0.515146	0.532683	agpat3.L	55.1111	41.1136	32.9385	26.2202	19.8906	55.1111	1	0.746012	0.597674	0.475769	0.360919
Xelaev18011266m.g	MAN1A2.L	38.1254	41.5702	31.3028	21.6064	23.2254	41.5702	0.917132	1	0.753011	0.519758	0.558702	man1a2.L	52.6164	41.7411	31.8149	23.4201	18.199	52.6164	1	0.79331	0.604658	0.445111	0.345881
Xelaev18011474m.g	ATP5O.L	63.6527	64.1544	46.6046	32.588	29.0606	64.1544	0.992181	1	0.726444	0.507963	0.45298	atp5o.L	68.5295	67.1282	49.0492	40.024	29.2354	68.5295	1	0.979552	0.715738	0.58404	0.42661
Xelaev18011510m.g	SOD1.L	73.0665	73.9116	59.5848	48.7701	33.1102	73.9116	0.988566	1	0.806164	0.659844	0.44797	sod1.L	76.9782	80.9514	64.813	50.1244	42.5047	80.9514	0.950919	1	0.800641	0.619192	0.525064
Xelaev18011525m.g	CCT8.L	68.4411	70.8605	57.3081	37.6777	34.9595	70.8605	0.965857	1	0.808745	0.531717	0.493357	cct8.L	73.9658	74.4143	60.0577	49.8434	31.8741	74.4143	0.993973	1	0.807072	0.66981	0.428333
Xelaev18011700m.g	PIGS.L	37.1008	40.2763	37.0833	23.3643	20.7113	40.2763	0.921158	1	0.920724	0.580102	0.514231	pigs.L	53.9262	36.307	28.5741	25.2039	18.9138	53.9262	1	0.673272	0.529874	0.467378	0.350735
Xelaev18011701m.g	ALDOC.L	56.3997	58.4124	44.9309	28.7088	26.5136	58.4124	0.965543	1	0.769202	0.491485	0.453903	aldoc.L	64.698	58.2286	43.3246	33.5671	24.995	64.698	1	0.900006	0.669644	0.518828	0.386333
Xelaev18011836m.g	APOO.L	38.698	38.0487	27.9641	17.7325	16.6857	38.698	1	0.983221	0.722624	0.458228	0.431176	apoo.L	44.4432	39.7586	31.12	24.9509	20.0163	44.4432	1	0.894593	0.700219	0.56141	0.45038
Xelaev18011875m.g	ATP5F1.L	58.0911	62.0224	37.2409	27.234	24.6564	62.0224	0.936615	1	0.600443	0.4391	0.39754	atp5f1.L	60.988	57.6398	40.6957	31.8399	22.8813	60.988	1	0.9451	0.667274	0.522068	0.375178
Xelaev18011930m.g	TMEM248.L	51.7465	61.1792	34.4611	24.0707	24.4247	61.1792	0.845819	1	0.563282	0.393446	0.399233	tmem248.L	62.413	46.7704	29.8861	26.4988	23.5276	62.413	1	0.74937	0.478843	0.424572	0.376966
Xelaev18012237m.g	RNPEP.L	65.0706	70.0443	55.3859	35.7487	34.9223	70.0443	0.928992	1	0.790727	0.510372	0.498575	rnpep.L	73.253	74.1626	60.1609	53.9032	32.1429	74.1626	0.987736	1	0.811203	0.726825	0.433411
Xelaev18012593m.g	TMEM57.L	26.7165	27.9823	20.4779	16.338	15.3295	27.9823	0.954765	1	0.731816	0.58387	0.547827	tmem57.L	37.5449	29.7555	24.9306	21.1748	15.4993	37.5449	1	0.79253	0.664021	0.563987	0.41282
Xelaev18012619m.g	NDUFS5.L	56.9147	56.796	42.1149	31.3476	27.8236	56.9147	1	0.997914	0.739965	0.550782	0.488864	ndufs5.L	67.6126	66.3349	56.8401	45.5905	34.1078	67.6126	1	0.981102	0.840674	0.67429	0.504459
Xelaev18012687m.g	STYXL1.L	47.1481	68.8133	51.4783	26.1398	27.9853	68.8133	0.685161	1	0.748086	0.379866	0.406685	styxl1.L	65.9442	60.7349	48.4217	37.5652	35.9833	65.9442	1	0.921005	0.734283	0.569652	0.545664
Xelaev18012760m.g	ASL.L	48.4174	42.5578	39.9213	25.6409	24.2673	48.4174	1	0.878976	0.824522	0.52958	0.501211	asl.L	55.2028	50.4866	37.9257	32.8529	20.7719	55.2028	1	0.914566	0.687025	0.595131	0.376284
Xelaev18012771m.g	CCT6A.L	49.8318	49.005	35.9182	22.9214	22.3915	49.8318	1	0.983409	0.720788	0.459975	0.449342	cct6a.L	46.283	45.2872	32.5199	26.3368	19.439	46.283	1	0.978484	0.702632	0.569039	0.420003
Xelaev18013368m.g	PA2G4.L	66.6259	70.7915	56.0801	40.7971	33.3285	70.7915	0.941158	1	0.792188	0.5763	0.470798	pa2g4.L	74.0305	70.4969	60.8528	52.1685	35.6824	74.0305	1	0.952269	0.821996	0.70469	0.481996
Xelaev18013378m.g	PMEL-LIKE.L	56.6391	58.1761	44.2473	31.43	28.2962	58.1761	0.973581	1	0.760575	0.540256	0.486388	pmel-like.L	60.9106	53.9866	40.4579	34.1415	21.7403	60.9106	1	0.886325	0.664217	0.560518	0.356922
Xelaev18013593m.g	C12ORF10.L	50.0877	53.9647	41.11	27.531	28.0787	53.9647	0.928158	1	0.761794	0.510167	0.520315	c12orf10.L	51.2049	53.1231	41.9242	33.6757	24.1822	53.1231	0.963891	1	0.78919	0.633918	0.455211
Xelaev18014144m.g	POLDIP2.S	36.9223	42.8556	41.6465	27.3901	19.5816	42.8556	0.861552	1	0.971787	0.639124	0.456921	poldip2.S	47.4232	38.5858	34.6299	26.6793	19.5927	47.4232	1	0.813649	0.730231	0.562581	0.413147
Xelaev18014219m.g	TOMM70A.S	35.5512	37.3766	29.3873	22.3871	20.2644	37.3766	0.95116	1	0.786249	0.598959	0.542167	tomm70a.S	45.1197	36.6693	29.7383	24.9718	18.0675	45.1197	1	0.812711	0.659098	0.553457	0.400433
Xelaev18014312m.g	ATP5O.S	70.8489	73.5239	51.8812	37.148	32.0501	73.5239	0.963617	1	0.705637	0.505251	0.435914	atp5o.S	80.0984	78.8979	61.852	48.9618	36.3661	80.0984	1	0.985012	0.7722	0.611271	0.454017
Xelaev18014380m.g	ACP6.S	47.4473	52.331	34.7143	24	23.7706	52.331	0.906676	1	0.663359	0.458619	0.454234	acp6.S	46.8303	45.4724	33.5266	28.6647	24.0756	46.8303	1	0.971002	0.715916	0.612096	0.514102
Xelaev18014432m.g	FAM162A.S	63.3823	68.4784	51.7179	37.6872	34.0129	68.4784	0.925582	1	0.755245	0.550352	0.496695	fam162a.S	69.6265	68.1225	49.2977	41.9402	26.5074	69.6265	1	0.9784	0.708031	0.602361	0.380709
Xelaev18014447m.g	NDUFB4.S	81.2944	86.8312	64.1004	46.9264	49.2997	86.8312	0.936235	1	0.738219	0.540433	0.567765	ndufb4.S	83.8138	86.0175	71.539	57.1784	36.4699	86.0175	0.974381	1	0.83168	0.66473	0.423983
Xelaev18014610m.g	XELAEV18014610M.G	30.1032	32.6663	23.916	16.4842	15.1739	32.6663	0.921536	1	0.732131	0.504625	0.464513	Xelaev18014610m.g	29.6732	25.88	21.9572	18.2675	13.9368	29.6732	1	0.872169	0.739968	0.615622	0.469676
Xelaev18014625m.g	TXNDC17.S	35.1342	38.6232	32.244	21.7115	18.5896	38.6232	0.909668	1	0.834837	0.562136	0.481307	txndc17.S	58.1737	53.7124	52.0818	40.8075	27.2632	58.1737	1	0.923311	0.895279	0.701476	0.468651
Xelaev18014721m.g	ATG3.S	64.1121	65.314	51.0808	38.187	31.5842	65.314	0.981599	1	0.78208	0.584668	0.483575	atg3.S	65.3984	64.8316	55.3776	43.7853	30.8213	65.3984	1	0.991334	0.846773	0.669517	0.471285
Xelaev18015162m.g	XELAEV18015162M.G	39.3246	44.8769	29.1614	21.7547	18.2402	44.8769	0.876276	1	0.649809	0.484763	0.406449	Xelaev18015162m.g	56.0594	55.606	39.7965	31.6729	24.4123	56.0594	1	0.991911	0.7099	0.564988	0.435472
Xelaev18015312m.g	MDH2.S	47.3432	49.7757	38.425	24.9441	21.1558	49.7757	0.951132	1	0.771963	0.501129	0.425022	mdh2.S	53.5654	50.5157	38.0165	27.8357	26.8478	53.5654	1	0.943066	0.709721	0.519658	0.501216
Xelaev18015901m.g	ATP5B.S	45.409	50.4041	35.7059	26.9403	23.8505	50.4041	0.900898	1	0.708391	0.534485	0.473185	atp5b.S	51.8906	52.6931	41.7698	35.2315	24.3555	52.6931	0.984771	1	0.792699	0.668617	0.462215
Xelaev18015940m.g	PIP4K2C.S	66.2765	65.5948	46.7109	35.0363	36.3455	66.2765	1	0.989714	0.704788	0.528639	0.548391	pip4k2c.S	74.9218	70.4938	48.2932	44.3106	33.0272	74.9218	1	0.940899	0.644582	0.591425	0.440822
Xelaev18016562m.g	TRIM3.S	42.4086	45.5495	32.8383	22.7405	21.56	45.5495	0.931045	1	0.720938	0.499249	0.473332	trim3.S	56.9104	46.047	37.4681	34.2576	24.5	56.9104	1	0.809114	0.65837	0.601957	0.430501
Xelaev18016746m.g	OVCH1.L	79.2632	86.5701	45.7763	39.8125	25.3297	86.5701	0.915595	1	0.528777	0.459887	0.292591	ovch1.L	93.1934	90.6667	74.3718	43.2757	52.1402	93.1934	1	0.972888	0.798037	0.464364	0.559484
Xelaev18016752m.g	CAPRIN2.L	71.9491	69.062	54.254	36.8722	37.4823	71.9491	1	0.959872	0.754061	0.512477	0.520955	caprin2.L	59.5371	63.6	39.2883	30.7429	17.8099	63.6	0.936119	1	0.61774	0.483378	0.28003
Xelaev18016802m.g	NDUFA9.L	66.0471	70.1775	51.8268	37.9875	36.6032	70.1775	0.941143	1	0.738511	0.541306	0.521581	ndufa9.L	70.2201	71.6423	60.0547	47.2101	32.1383	71.6423	0.980149	1	0.838258	0.65897	0.448594
Xelaev18016911m.g	MRPL22.L	45.383	48.4893	34.219	22.3367	19.134	48.4893	0.935938	1	0.705703	0.460652	0.394603	mrpl22.L	50.0586	48.7663	39.4983	26.9722	23.4646	50.0586	1	0.974184	0.789042	0.538813	0.468744
Xelaev18016926m.g	ZP4.L	42.7347	48.7469	31.1849	23.9987	23.2979	48.7469	0.876665	1	0.639731	0.492312	0.477935	zp4.L	57.9872	38.4136	28.6458	23.8177	22.3795	57.9872	1	0.662449	0.494001	0.410741	0.385939
Xelaev18016962m.g	PCBD2.L	95.4167	97.9202	78.2857	45.1869	46.4944	97.9202	0.974432	1	0.799484	0.461467	0.474819	pcbd2.L	101.049	96.9718	81.3305	62.6301	40.4497	101.049	1	0.959651	0.804862	0.619799	0.400298
Xelaev18017170m.g	RAD50.L	36.3235	38.9236	27.7573	17.1922	17.3529	38.9236	0.9332	1	0.713121	0.441689	0.44582	rad50.L	36.6486	33.3056	36.9608	19.6905	13.7125	36.9608	0.991555	0.901105	1	0.53274	0.371001
Xelaev18017367m.g	UTP20.L	45.139	41.6006	28.8387	24.6452	20.8088	45.139	1	0.921611	0.638885	0.545983	0.460994	utp20.L	31.474	36.6152	25.4191	19.6037	17.842	36.6152	0.859589	1	0.694222	0.535396	0.487284
Xelaev18017621m.g	ZNF277.L	42.6667	46.1328	35.4789	22.775	28.697	46.1328	0.924866	1	0.76906	0.493684	0.622051	znf277.L	56.3617	41.1435	32.1965	24.7972	18.6432	56.3617	1	0.729991	0.571248	0.439966	0.330778
Xelaev18018003m.g	USP3.L	25.9324	32.5597	19.3918	24.4599	17.8413	32.5597	0.796457	1	0.595574	0.75123	0.547955	usp3.L	45.9938	30.944	24.9739	19.8281	16.0806	45.9938	1	0.672785	0.542984	0.431104	0.349626
Xelaev18018020m.g	PKM.L	48.9212	56.2632	34.8579	23.3739	19.7692	56.2632	0.869507	1	0.619551	0.415438	0.351371	pkm.L	54.8716	48.8203	34.0867	24.3892	17.2562	54.8716	1	0.88972	0.621208	0.444478	0.314483
Xelaev18018057m.g	ICE2.L	33.9135	33.6549	26.3798	16.7463	17.3185	33.9135	1	0.992375	0.777856	0.493795	0.510667	ice2.L	43.259	33.2078	24.777	20.0599	16.64	43.259	1	0.767651	0.572759	0.463716	0.38466
Xelaev18018084m.g	PPIB.L	49.9607	50.0572	41.671	27.5097	23.653	50.0572	0.998071	1	0.832466	0.549564	0.472518	ppib.L	39.7778	45.5918	38.4636	26.1765	15.8955	45.5918	0.872476	1	0.843652	0.574148	0.348648
Xelaev18018501m.g	PROSC.L	39.961	35.5331	31.144	22.2935	21.1594	39.961	1	0.889195	0.77936	0.557881	0.529502	prosc.L	47.1006	39.9222	34.0684	27.1099	21.4965	47.1006	1	0.847593	0.723312	0.575574	0.456394
Xelaev18018525m.g	FIGLA.L	66.6023	69.4957	48.5101	39.6527	30.4198	69.4957	0.958366	1	0.698031	0.570579	0.437723	figla.L	54.5894	65.1827	52.438	40.2985	25.1478	65.1827	0.837482	1	0.804476	0.618239	0.385805
Xelaev18018749m.g	XPO7.L	34.9261	41.5269	28.6892	17.5	21.3731	41.5269	0.841046	1	0.690857	0.421413	0.514681	xpo7.L	47.2038	40.5207	29.4918	21.3966	14.6875	47.2038	1	0.858421	0.624776	0.453283	0.311151
Xelaev18018778m.g	GINS4.L	49.7685	52.5896	41.4134	25.3583	26.4055	52.5896	0.946357	1	0.787482	0.482192	0.502106	gins4.L	53.6028	47.4972	36.3457	31.488	22.2831	53.6028	1	0.886096	0.678057	0.587432	0.415708
Xelaev18019092m.g	WDR83OS.L	48.0564	54.1965	43.3158	27.4157	25.625	54.1965	0.886706	1	0.799236	0.505858	0.472816	wdr83os.L	52.8392	39.4892	30.9802	27.1531	19.6429	52.8392	1	0.747347	0.586311	0.513881	0.371748
Xelaev18019199m.g	STAG3.L	48.2165	60.4245	44.6763	26.3822	29.3267	60.4245	0.797963	1	0.739374	0.436615	0.485344	stag3.L	53.8209	51.3307	40.0102	28.0671	20.5996	53.8209	1	0.953731	0.743395	0.52149	0.382743
Xelaev18019354m.g	LOC394444.L	57.2619	59.2433	41.3718	27.6192	26.7154	59.2433	0.966554	1	0.698337	0.466199	0.450943	loc394444.L	70.1907	58.0267	40.766	32.1707	23.4835	70.1907	1	0.826701	0.580789	0.458332	0.334567
Xelaev18019539m.g	ACADVL.L	54.5957	60.3938	39.6381	24.754	27.168	60.3938	0.903994	1	0.656328	0.409876	0.449847	acadvl.L	65.8624	58.0161	39.015	31.5872	22.0373	65.8624	1	0.880869	0.592372	0.479595	0.334597
Xelaev18019950m.g	MED7.S	37.7172	40.878	27.924	18.8495	18.806	40.878	0.922676	1	0.683104	0.461116	0.460051	med7.S	45.2845	39.9051	29.4529	21.363	15.3333	45.2845	1	0.881209	0.650397	0.47175	0.3386
Xelaev18020029m.g	ZP4.S	57.9068	57.7269	40.0065	28.8562	24.6827	57.9068	1	0.996894	0.690878	0.498321	0.426249	zp4.S	67.4925	49.6774	35.7926	28.238	26.5505	67.4925	1	0.736043	0.53032	0.418388	0.393384
Xelaev18020168m.g	AP3M2.S	47.3292	50.2122	29.8187	20.0149	18.8862	50.2122	0.942583	1	0.593853	0.398606	0.376127	ap3m2.S	44.1772	37.2558	26.0406	20.2702	19.0058	44.1772	1	0.843326	0.589459	0.458838	0.430218
Xelaev18020199m.g	XPO7.S	32.0842	35.2841	27.0431	17.6934	19.5241	35.2841	0.909311	1	0.766439	0.501456	0.553341	xpo7.S	42.4642	34.8029	26.1926	21.3883	17.0255	42.4642	1	0.819583	0.616815	0.503678	0.400937
Xelaev18020302m.g	COX5B.1.S	45.9172	46.8466	35.5617	23.8222	22.2199	46.8466	0.98016	1	0.759108	0.508514	0.474312	cox5b.1.S	51.0494	52.1116	36.8141	27.1689	24.2746	52.1116	0.979617	1	0.706446	0.52136	0.46582
Xelaev18020599m.g	USP8.S	40.6157	43.6943	35.0831	21.5653	20.9653	43.6943	0.929543	1	0.802922	0.49355	0.479819	usp8.S	50.2201	41.9924	34.8482	29.4263	22.1014	50.2201	1	0.836167	0.69391	0.585947	0.440092
Xelaev18020793m.g	PKM.S	39.1011	42.0067	30.4173	23.6458	18.96	42.0067	0.93083	1	0.724105	0.562906	0.451356	pkm.S	46.027	45.8684	24.4304	22	17.4246	46.027	1	0.996554	0.530783	0.47798	0.378573
Xelaev18020826m.g	TSPAN3.S	46.1228	57.9824	48.8943	33.7939	28.173	57.9824	0.795463	1	0.843261	0.582831	0.485889	tspan3.S	49.3051	48.726	40.4505	28.0154	21.1715	49.3051	1	0.988256	0.820411	0.568205	0.429398
Xelaev18020971m.g	PSMC2.S	57.5812	59.3222	44.8119	31.5648	24.5507	59.3222	0.970653	1	0.755398	0.53209	0.413854	psmc2.S	52.0761	57.8214	39.9306	32.5094	25.9798	57.8214	0.900637	1	0.690586	0.562238	0.449311
Xelaev18021044m.g	NDUFA5.S	44.4842	46.999	29.6031	21.1396	21.0641	46.999	0.946492	1	0.629866	0.449789	0.448182	ndufa5.S	51.7862	46.1424	34.7883	27.4052	24.4329	51.7862	1	0.891018	0.671769	0.529199	0.471803
Xelaev18021177m.g	MDM2.S	33.6861	36.5816	35.5411	23.9148	19.7834	36.5816	0.920848	1	0.971558	0.653738	0.540802	mdm2.S	43.4921	35.9477	30.6864	25.4332	17.1379	43.4921	1	0.826534	0.705561	0.584778	0.394047
Xelaev18021371m.g	PRELID1.S	64.6741	70.27	46.8758	28.2755	33.1429	70.27	0.920366	1	0.667081	0.402384	0.47165	prelid1.S	57.3235	66.6737	48.5311	42.8182	26.9444	66.6737	0.859762	1	0.72789	0.642205	0.404124
Xelaev18021466m.g	UQCRQ.S	67.7273	71.2833	61.5454	44.412	35.0574	71.2833	0.950114	1	0.863391	0.623036	0.491804	uqcrq.S	73.916	76.7165	66.8778	50.951	36.1396	76.7165	0.963496	1	0.871752	0.664147	0.47108
Xelaev18021471m.g	GNPDA1.S	43.3193	46.6524	40.2492	23.3823	21.5714	46.6524	0.928554	1	0.862746	0.501201	0.462386	gnpda1.S	52.6858	53.3221	39.1552	30.5299	22.8899	53.3221	0.988066	1	0.734315	0.572556	0.429275
Xelaev18021929m.g	PSMC3.L	46.0477	47.996	36.2692	23.3536	21.5891	47.996	0.959407	1	0.755672	0.486574	0.449811	psmc3.L	58.6494	49.0427	37.4435	29.7682	22.7515	58.6494	1	0.836202	0.63843	0.507562	0.387924
Xelaev18022090m.g	AP2A2.L	56.242	63.5861	46.3036	34.5199	34.272	63.5861	0.884502	1	0.728204	0.542884	0.538986	ap2a2.L	67.3467	60.4783	42.8093	34.844	20.5143	67.3467	1	0.898014	0.635655	0.517382	0.304607
Xelaev18022201m.g	PRDX5.L	63.7652	67.7	48.4957	33.042	31.9414	67.7	0.941878	1	0.716332	0.488066	0.471808	prdx5.L	62.069	73.2964	56.2643	50.3526	29.2294	73.2964	0.846822	1	0.767628	0.686973	0.398783
Xelaev18022224m.g	XELAEV18022224M.G	60.2593	63.2356	48.1714	31.7172	27.1414	63.2356	0.952934	1	0.761777	0.501572	0.429211	Xelaev18022224m.g	65.2373	62.919	45.7813	34.3274	20.4742	65.2373	1	0.964464	0.701766	0.526192	0.313842
Xelaev18022576m.g	LOC100487456-LIKE.L	36.2419	41.3319	28.9337	20.6358	21.2201	41.3319	0.876851	1	0.700034	0.499272	0.513408	loc100487456-like.L	46.7306	37.371	29.7893	20.3054	16.5408	46.7306	1	0.799711	0.637469	0.434521	0.353961
Xelaev18022739m.g	FAAP24.L	76.4503	75.7929	56.4796	38.2911	29.6211	76.4503	1	0.991402	0.738775	0.500863	0.387456	faap24.L	81.1088	76.829	59.6014	46.1549	30.9874	81.1088	1	0.947234	0.734833	0.56905	0.382048
Xelaev18022851m.g	ZPD.L	67.1802	68.2273	69.819	46.5591	34.7414	69.819	0.962205	0.977201	1	0.666854	0.497592	zpd.L	56.4198	55.3727	45.2253	35.7573	26.383	56.4198	1	0.981441	0.801584	0.633771	0.467619
Xelaev18022989m.g	RAVER2.L	37.2636	29.0195	26.632	20.59	18.0267	37.2636	1	0.778762	0.714692	0.552549	0.483763	raver2.L	41.3491	31.0328	25.8	19.4857	19.25	41.3491	1	0.750509	0.623956	0.471249	0.465549
Xelaev18023259m.g	SMG7.L	41.472	46.8081	36.7911	27.34	24.8393	46.8081	0.886	1	0.785998	0.584086	0.530663	smg7.L	59.2971	44.0985	34.7626	29.2276	22.7215	59.2971	1	0.743687	0.586244	0.492901	0.383181
Xelaev18023498m.g	XRCC6.L	44.068	44.8002	36.3767	24.5829	23.1288	44.8002	0.983656	1	0.811975	0.548722	0.516266	xrcc6.L	54.8137	47.1184	38.9138	29.9244	22.0612	54.8137	1	0.85961	0.709928	0.545928	0.402476
Xelaev18023599m.g	LOC100494164.L	81.2925	76.3404	61.0483	44.9899	38.0645	81.2925	1	0.939083	0.75097	0.553433	0.468241	loc100494164.L	88.0317	89.2176	77.266	62.2954	42.7721	89.2176	0.986708	1	0.866041	0.698241	0.479414
Xelaev18023613m.g	MGST3.L	71.0848	69.4384	55.3281	38.4869	34.3098	71.0848	1	0.976839	0.778339	0.541422	0.48266	mgst3.L	67.5162	74.1768	60.6919	42.3936	29.107	74.1768	0.910206	1	0.818206	0.571521	0.3924
Xelaev18023638m.g	WBP2NL.L	48.0054	49.3842	41.1626	32.295	21.211	49.3842	0.972081	1	0.833518	0.653954	0.42951	wbp2nl.L	51.6217	56.6832	37.5723	29.5152	28.4379	56.6832	0.910706	1	0.662847	0.520704	0.501698
Xelaev18023800m.g	USP4.L	35.8172	40.3677	28.7354	22.264	22.8655	40.3677	0.887274	1	0.711843	0.551531	0.56643	usp4.L	46.8375	37.1531	32.5205	24.1782	15.3234	46.8375	1	0.793234	0.694326	0.516214	0.327161
Xelaev18023909m.g	ITPR1.L	43.936	43.6004	38.823	25.3574	23.9947	43.936	1	0.992363	0.883626	0.577144	0.54613	itpr1.L	46.76	45.9378	38.8043	31.9178	15.5439	46.76	1	0.982416	0.829862	0.682588	0.332418
Xelaev18024004m.g	COPG1.L	42.1523	40.0621	28.1859	19.0177	18.3537	42.1523	1	0.950415	0.668669	0.451166	0.435414	copg1.L	44.4553	39.8022	28.3888	22.9729	16.8114	44.4553	1	0.895331	0.638591	0.516765	0.378163
Xelaev18024107m.g	ARL6IP5.L	48.8287	56.0789	49.4174	27.8256	22.1852	56.0789	0.870714	1	0.881211	0.496186	0.395606	arl6ip5.L	64.0608	54.9048	47.7925	30.4071	26.4225	64.0608	1	0.857073	0.746049	0.474661	0.412459
Xelaev18024209m.g	NXF1.S	31.3767	27.0737	16.2462	12.6627	16.7394	31.3767	1	0.862859	0.517778	0.403569	0.533499	nxf1.S	27.6535	20.6019	16.0131	17.2184	12.5285	27.6535	1	0.745004	0.579064	0.622649	0.453055
Xelaev18024227m.g	STIP1.S	56.1414	59.1491	56.3652	34.6257	28.7811	59.1491	0.949152	1	0.952936	0.585398	0.486586	stip1.S	57.2242	58.9053	56.1605	33.2232	29.1311	58.9053	0.971461	1	0.953402	0.56401	0.494542
Xelaev18024255m.g	SPDYC.S	78.1712	86.9338	63.557	48.4701	45.9892	86.9338	0.899204	1	0.731096	0.557552	0.529014	spdyc.S	61.7602	70.3636	51.3469	45.4533	32.4828	70.3636	0.87773	1	0.729738	0.645978	0.461642
Xelaev18024338m.g	SDHAF2.S	64.9462	65.2933	42.994	32.0865	32.7955	65.2933	0.994683	1	0.658475	0.491421	0.502279	sdhaf2.S	71.0198	73.7916	53.4814	41.4749	30.6309	73.7916	0.962437	1	0.724763	0.562055	0.4151
Xelaev18024888m.g	DEF8.S	31.9247	34.3248	27.2576	20.175	17.6769	34.3248	0.930077	1	0.794108	0.587767	0.514988	def8.S	41.2829	30.9087	26.7442	21.7048	18.3811	41.2829	1	0.748705	0.647828	0.525757	0.445248
Xelaev18025076m.g	ACADM.S	69.2168	71.1021	52.9084	41.205	34.5909	71.1021	0.973484	1	0.744118	0.579518	0.486496	acadm.S	66.5571	71.1759	52.8889	50.5156	35.1169	71.1759	0.935108	1	0.743073	0.70973	0.493382
Xelaev18025316m.g	MRPS14.S	37.8012	36.6576	25.9635	18.0833	17.3148	37.8012	1	0.969747	0.686843	0.47838	0.45805	mrps14.S	45.5566	40.3412	27.4335	21.4944	19.1284	45.5566	1	0.885518	0.602184	0.471818	0.419883
Xelaev18025333m.g	SMG7.S	46.6397	50.9493	34.1617	24.3301	22.4609	50.9493	0.915413	1	0.670503	0.477536	0.440847	smg7.S	63.422	51.1065	36.1667	30.1565	26.2908	63.422	1	0.805816	0.570254	0.47549	0.414538
Xelaev18025421m.g	SH3GLB1.S	35.7834	33.4332	28.5105	21.1018	21.06	35.7834	1	0.93432	0.796751	0.589708	0.58854	sh3glb1.S	44.2281	32.8155	25.797	19.5094	15.8393	44.2281	1	0.741961	0.583272	0.44111	0.358127
Xelaev18025568m.g	ST13.S	35.9674	38.9683	34.6369	22.1983	17.7035	38.9683	0.922992	1	0.888849	0.569652	0.454305	st13.S	65.2581	44.858	36.9245	38.0718	20.4375	65.2581	1	0.687394	0.565823	0.583404	0.31318
Xelaev18025593m.g	IMP3.S	45.5053	51.9788	33.2591	24.9125	24.7453	51.9788	0.875458	1	0.639859	0.479281	0.476065	imp3.S	46.1142	44.047	30.9078	26.601	22.2402	46.1142	1	0.955172	0.670245	0.57685	0.482285
Xelaev18025823m.g	RPL29.S	61.4618	74.1051	49.8246	36.5677	27.0957	74.1051	0.829387	1	0.67235	0.493457	0.365638	rpl29.S	70.399	73.7917	64.1451	41.385	42.4355	73.7917	0.954024	1	0.869272	0.560836	0.575071
Xelaev18025900m.g	RUVBL1.S	45.0004	46.9174	36.5703	23.9264	21.5227	46.9174	0.959142	1	0.779462	0.509968	0.458737	ruvbl1.S	49.2864	48.4089	39.389	29.8415	21.8155	49.2864	1	0.982196	0.799187	0.605471	0.442628
Xelaev18026122m.g	MSH2.L	46.5987	49.947	42	27.2933	16.4215	49.947	0.932963	1	0.840891	0.546446	0.328778	msh2.L	48.0142	47.3952	39.0551	27.85	30.9167	48.0142	1	0.987109	0.813408	0.580037	0.643907
Xelaev18026204m.g	PPP2R5A.L	50.4058	53.6934	38.6988	24.5555	25.0766	53.6934	0.93877	1	0.720737	0.457327	0.467033	ppp2r5a.L	59.6539	54.519	39.7088	34.1325	25.5425	59.6539	1	0.913923	0.665653	0.572176	0.428179
Xelaev18026291m.g	XELAEV18026291M.G	50.6581	58.6542	47.4226	30.3835	29.602	58.6542	0.863674	1	0.808512	0.518011	0.504686	Xelaev18026291m.g	78.6665	80.193	66.3924	53.8978	33.6353	80.193	0.980965	1	0.827908	0.672101	0.41943
Xelaev18026300m.g	PARP1.L	49.3138	55.2239	45.7292	27.0247	25.0223	55.2239	0.892978	1	0.82807	0.489366	0.453106	parp1.L	53.8061	55.0397	43.5042	31.1281	21.1869	55.0397	0.977587	1	0.790414	0.565557	0.384939
Xelaev18026311m.g	EHD3.L	35.1311	40.7549	25.7904	19.8837	17.2342	40.7549	0.86201	1	0.632818	0.487886	0.422876	ehd3.L	47.7799	34.7241	29.2139	22.3812	19.7025	47.7799	1	0.726753	0.611427	0.468423	0.412361
Xelaev18026595m.g	NANP.L	36.7021	48.9928	39.9192	32.5455	21.6053	48.9928	0.749134	1	0.814798	0.664291	0.440989	nanp.L	37.897	32.3662	23.9231	24.3005	18.2857	37.897	1	0.854058	0.631266	0.641227	0.482511
Xelaev18026613m.g	DUSP12.L	34.6201	39.1408	26.636	19.1379	16.6067	39.1408	0.884502	1	0.680517	0.488951	0.424282	dusp12.L	39.4061	37.4394	25.9926	21.0073	19.8772	39.4061	1	0.950091	0.659609	0.533099	0.504419
Xelaev18026616m.g	DTD1.L	39.947	41.2582	34.7317	24.341	19.6064	41.2582	0.96822	1	0.841814	0.589969	0.475212	dtd1.L	44.9461	40.1254	28.7636	19.605	18.8788	44.9461	1	0.892746	0.639959	0.43619	0.420032
Xelaev18027459m.g	TCTEX1D2.L	64.7436	67.536	52.932	34.6785	30.3508	67.536	0.958653	1	0.78376	0.513482	0.449402	tctex1d2.L	57.4572	57.2069	44.7872	36.3521	29.3654	57.4572	1	0.995644	0.779487	0.632681	0.511082
Xelaev18027460m.g	LOC101730727.L	57.7273	63.3448	41.4492	29.2951	23.8952	63.3448	0.911318	1	0.654342	0.46247	0.377225	loc101730727.L	54.9753	59.5312	49.8287	38.736	30.8634	59.5312	0.92347	1	0.837018	0.650683	0.518441
Xelaev18027556m.g	MRPL47.L	57.0606	56.6454	46.7367	32.3731	28.8758	57.0606	1	0.992724	0.819073	0.567346	0.506056	mrpl47.L	59.3434	57.5673	45.1043	37.377	27.5292	59.3434	1	0.970072	0.760056	0.629843	0.463897
Xelaev18027787m.g	MOGAT1.L	38.0392	40.7472	27.1296	19.9159	20.9298	40.7472	0.933544	1	0.665804	0.488768	0.51365	mogat1.L	50.8126	33.8687	25.0403	19.8543	16.877	50.8126	1	0.666542	0.492798	0.390736	0.332143
Xelaev18027824m.g	XELAEV18027824M.G	32.4091	36.33	25.9133	16.6395	19.5517	36.33	0.892075	1	0.713276	0.458011	0.53817	Xelaev18027824m.g	46.2857	33.9845	29.1351	20.0136	14.8	46.2857	1	0.734232	0.629463	0.432392	0.319753
Xelaev18027896m.g	COPB2.L	43.0462	46.4251	35.4386	22.9896	18.377	46.4251	0.927219	1	0.76335	0.495197	0.395843	copb2.L	56.1191	42.407	35.7118	27.4441	26.8772	56.1191	1	0.755661	0.636357	0.489032	0.478931
Xelaev18028086m.g	ZPAX.L	45.3373	51.4633	32.8449	22.5422	22.3119	51.4633	0.880964	1	0.638221	0.438026	0.433549	zpax.L	57.3926	46.9287	37.9889	30.5291	20.8532	57.3926	1	0.817679	0.661913	0.531933	0.363342
Xelaev18028119m.g	C2ORF44.L	32.6046	32.3812	24.8413	17.878	17.9739	32.6046	1	0.993149	0.761895	0.548329	0.551269	c2orf44.L	41	31.7154	23.5958	20.1871	15.0278	41	1	0.773545	0.575508	0.492368	0.366531
Xelaev18028453m.g	DNAJC5G.L	42.9537	47.2389	38.0611	24.5903	23.7938	47.2389	0.909288	1	0.805715	0.520553	0.503691	dnajc5g.L	57.6622	43.7399	34.7168	24	26.5094	57.6622	1	0.758554	0.602072	0.416217	0.459737
Xelaev18028479m.g	CCT4.S	48.7542	51.1059	34.2843	23.5966	19.6455	51.1059	0.953985	1	0.670848	0.461721	0.384408	cct4.S	51.3263	48.6029	31.9954	26.6435	14.8235	51.3263	1	0.946938	0.623372	0.5191	0.28881
Xelaev18028697m.g	PPP2R5A.S	48.0117	52.9039	34.6404	24.263	21.8004	52.9039	0.907526	1	0.65478	0.458624	0.412074	ppp2r5a.S	58.2679	50.4014	35.7664	28.9507	18.701	58.2679	1	0.864994	0.613827	0.496856	0.320948
Xelaev18028708m.g	LOC100491945.S	48.6339	48.8316	45.0149	26.0699	24.5223	48.8316	0.99595	1	0.92184	0.533874	0.502181	loc100491945.S	53.243	52.4562	42.5362	34.8589	24.7132	53.243	1	0.985221	0.798906	0.654712	0.464159
Xelaev18028738m.g	DYNC2LI1.S	50.7688	51.2296	37.6636	26.7327	27.5072	51.2296	0.991004	1	0.735192	0.521821	0.53694	dync2li1.S	54.5824	50.3111	37.9052	28.8592	23.8659	54.5824	1	0.921745	0.694458	0.528727	0.437245
Xelaev18029543m.g	PSMD2.S	44.016	50.8387	37.372	26.3582	20.8333	50.8387	0.865796	1	0.735108	0.518467	0.409793	psmd2.S	41.7607	39.0799	42.6558	29.0027	21.7191	42.6558	0.979014	0.916167	1	0.679924	0.509172
Xelaev18029881m.g	THAP4.S	59.2792	59.6476	44.7851	33.4792	31.4608	59.6476	0.993824	1	0.750828	0.561283	0.527444	thap4.S	61.0642	55.0287	41.0158	32.4922	23.3555	61.0642	1	0.901161	0.671683	0.532098	0.382475
Xelaev18029921m.g	MYEOV2.S	76.7884	77.2241	56.2611	37.9022	34.8864	77.2241	0.994358	1	0.728543	0.490807	0.451755	myeov2.S	78.0797	82.686	62.1335	51.1012	33.2466	82.686	0.944293	1	0.751439	0.618016	0.402082
Xelaev18030471m.g	XELAEV18030471M.G	37.7565	40.8228	28.1675	21.9862	19.4393	40.8228	0.924887	1	0.689994	0.538577	0.476187	Xelaev18030471m.g	47.4175	37.6649	27.9582	23.9842	22.0061	47.4175	1	0.794325	0.589617	0.505808	0.464093
Xelaev18030520m.g	NDUFB10.L	69.971	76.8712	54.5558	41.8202	31.6815	76.8712	0.910236	1	0.709705	0.54403	0.412137	ndufb10.L	70.4917	79.4258	61.689	44.6986	33.9282	79.4258	0.887516	1	0.776687	0.562771	0.427168
Xelaev18030615m.g	DNAJC19.L	65.3106	71.6542	60.9622	41.223	38.2133	71.6542	0.91147	1	0.850783	0.575305	0.533302	dnajc19.L	70.0049	69.75	62.2455	52.4086	32.4849	70.0049	1	0.996359	0.889159	0.748641	0.464037
Xelaev18030618m.g	GARS.L	52.5067	64.4199	55.2823	41.169	28.1059	64.4199	0.815069	1	0.858155	0.639073	0.436292	gars.L	48.5	61.0396	51.6111	36.6	27.0921	61.0396	0.794566	1	0.845535	0.599611	0.443845
Xelaev18030845m.g	SRI.L	45.7862	47.7045	33.3809	23.565	20.1733	47.7045	0.959789	1	0.699744	0.493979	0.422881	sri.L	50.7617	46.2678	35.2017	27.2937	19.5365	50.7617	1	0.911472	0.69347	0.537683	0.384867
Xelaev18030932m.g	GPNMB.L	62.2575	71.2075	59.7874	40.2431	32.7013	71.2075	0.874311	1	0.839623	0.565152	0.45924	gpnmb.L	66.6645	67.0266	40.4785	38.7701	23.5312	67.0266	0.994599	1	0.603917	0.578429	0.351073
Xelaev18031110m.g	RPL14.L	61.4246	62.5008	47.9545	35.0174	30.3346	62.5008	0.982781	1	0.767262	0.560272	0.485347	rpl14.L	65.7516	66.7478	52.5463	43.2658	33.0852	66.7478	0.985076	1	0.787237	0.648198	0.495674
Xelaev18031863m.g	EPB41L3.L	23.1654	41.7705	33.4545	23.6957	22.3793	41.7705	0.554588	1	0.800913	0.567282	0.535768	epb41l3.L	38.3762	35.9143	20.5726	16.5827	13.9123	38.3762	1	0.935847	0.536078	0.432108	0.362523
Xelaev18032137m.g	FABP4.L	27.2035	32.3833	24.2281	19.4395	18.5101	32.3833	0.840046	1	0.748165	0.600293	0.571593	fabp4.L	46.5262	30.8453	24.3757	21.1013	16.0736	46.5262	1	0.662966	0.523914	0.453536	0.345475
Xelaev18032172m.g	NBN.L	38.2012	40.1189	28.2031	17.8132	20.3764	40.1189	0.9522	1	0.702989	0.44401	0.5079	nbn.L	46.1917	39.9182	31.333	23.1411	16.2462	46.1917	1	0.864187	0.678326	0.50098	0.351713
Xelaev18032352m.g	NDUFB9.L	62.9914	67.3723	52.1823	33.6062	31.3504	67.3723	0.934974	1	0.774536	0.498813	0.465331	ndufb9.L	71.0308	70.4056	56.3075	53.4642	31.8172	71.0308	1	0.991198	0.792719	0.75269	0.447935
Xelaev18032730m.g	NDUFB10.S	63.4475	66.1487	45.8462	31.717	30.6307	66.1487	0.959165	1	0.693077	0.47948	0.463058	ndufb10.S	63.3175	64.2921	47.6837	42.8483	33.604	64.2921	0.984842	1	0.741674	0.666464	0.522678
Xelaev18033224m.g	EZH2.S	34.0998	33.9139	26.3093	17.9382	19	34.0998	1	0.994549	0.771538	0.526049	0.557189	ezh2.S	45.9126	35.7465	29.1885	24.6078	18.6765	45.9126	1	0.778577	0.63574	0.535971	0.406783
Xelaev18033245m.g	MRPL32.S	36.7013	50.0333	39.7885	21.1321	18.6579	50.0333	0.733537	1	0.795239	0.42236	0.372909	mrpl32.S	44.2295	38.0631	32	21.0167	23.2222	44.2295	1	0.860581	0.723499	0.475173	0.525039
Xelaev18033317m.g	NDUFS6.S	58.2229	60.8421	48.5341	34.4927	32.0474	60.8421	0.95695	1	0.797706	0.566921	0.52673	ndufs6.S	69.9006	69.4778	54.406	42.8485	29.9527	69.9006	1	0.993951	0.778333	0.612992	0.428504
Xelaev18033765m.g	MTFR1.S	45.6749	49.7778	37.1779	25.2444	26.6055	49.7778	0.917576	1	0.746878	0.507143	0.534486	mtfr1.S	51.5541	48	39.4824	28.6918	21.8167	51.5541	1	0.93106	0.765843	0.556537	0.42318
Xelaev18034322m.g	OVOS2.L	88.2433	91.4291	73.6828	49.1099	48.9612	91.4291	0.965156	1	0.805901	0.537136	0.535511	ovos2.L	85.3996	94.8996	73.4094	57.4198	40.029	94.8996	0.899895	1	0.773548	0.605059	0.421804
Xelaev18034508m.g	GSTK1.L	52.7807	61.4881	46.6833	31.2522	28.6857	61.4881	0.85839	1	0.759226	0.508264	0.466525	gstk1.L	70.1759	67.7085	53.0247	40.334	28.8373	70.1759	1	0.96484	0.755597	0.574755	0.410929
Xelaev18035020m.g	FTSJ3.L	52.5271	50.5947	33.7887	26.4366	19.8641	52.5271	1	0.963212	0.643262	0.503294	0.378168	ftsj3.L	63.0333	58.0101	45.3468	34.0229	24.3155	63.0333	1	0.920308	0.71941	0.539761	0.385755
Xelaev18035098m.g	NDUFV1.L	64.9814	67.2949	52.0947	37.4047	29.8901	67.2949	0.965622	1	0.774126	0.555833	0.444166	ndufv1.L	75.6824	71.5331	58.7858	47.3052	30.826	75.6824	1	0.945175	0.776744	0.625049	0.407308
Xelaev18035213m.g	HSPA8.L	44.3232	45.2383	40.2459	25.9055	20.2184	45.2383	0.979771	1	0.889641	0.572645	0.44693	hspa8.L	40.4554	44.1019	31.3014	29.8197	24.3333	44.1019	0.917317	1	0.709752	0.676155	0.551753
Xelaev18035401m.g	ARCN1.L	63.3797	71.7929	54.1566	45.1081	39.4748	71.7929	0.882813	1	0.754345	0.628309	0.549843	arcn1.L	70.5921	63.9016	55.0507	42.202	27.0907	70.5921	1	0.905223	0.779842	0.597829	0.383763
Xelaev18035585m.g	XELAEV18035585M.G	37.5052	41.375	26.8927	21.4227	18.6064	41.375	0.90647	1	0.649975	0.517769	0.449701	Xelaev18035585m.g	39.1073	42.3742	26.5503	21.1768	15.1026	42.3742	0.922904	1	0.626568	0.499757	0.356409
Xelaev18035746m.g	PARK7.L	78.6078	78.1788	56.7642	37.1617	32.1915	78.6078	1	0.994543	0.722119	0.472749	0.40952	park7.L	74.6274	75.5764	63.6004	54.1845	39.6774	75.5764	0.987442	1	0.841537	0.716949	0.524997
Xelaev18036318m.g	ETFB.L	60.1022	65.5954	50.8788	31.0602	33.3068	65.5954	0.916255	1	0.775645	0.473512	0.507762	etfb.L	66.4454	68.6352	52.5087	38.7931	28.8212	68.6352	0.968095	1	0.765041	0.565208	0.419919
Xelaev18036369m.g	SDHB.L	43.6779	50.1328	34.0754	20.569	21.1377	50.1328	0.871243	1	0.679703	0.410289	0.421634	sdhb.L	51.389	40.0128	30.8197	22.5921	23.7423	51.389	1	0.778626	0.599732	0.439629	0.462011
Xelaev18036564m.g	COX6B1.L	70.7865	72.1581	51.7972	37.351	32.4605	72.1581	0.980992	1	0.71783	0.517627	0.449852	cox6b1.L	78.5763	80.76	65.1343	52.5182	38.479	80.76	0.97296	1	0.806516	0.650299	0.476461
Xelaev18036568m.g	XELAEV18036568M.G	68.3727	60.8696	57.6711	42.0769	37.2394	68.3727	1	0.890262	0.843482	0.615406	0.544654	Xelaev18036568m.g	56.2783	60.3155	48.6802	38.3071	24.0469	60.3155	0.933065	1	0.807094	0.635113	0.398685
Xelaev18036879m.g	BCCIP.S	42.5771	45.8695	33.396	23.2465	19.6718	45.8695	0.928223	1	0.728065	0.506796	0.428863	bccip.S	41.8113	37.7691	32.1886	24.2216	20.8343	41.8113	1	0.903321	0.769853	0.579308	0.498294
Xelaev18037286m.g	HSPA8.S	52.301	55.6912	39.2504	25.8056	21.8819	55.6912	0.939124	1	0.704786	0.46337	0.392914	hspa8.S	40.0913	46.8858	29.4629	26.0952	21.5616	46.8858	0.855085	1	0.628397	0.55657	0.459876
Xelaev18037480m.g	XELAEV18037480M.G	54.8958	50.9414	41.5361	25.6338	17.6009	54.8958	1	0.927966	0.756634	0.466954	0.320624	Xelaev18037480m.g	38.253	47.8961	30.2149	26.0072	16.5846	47.8961	0.798666	1	0.630842	0.542992	0.346262
Xelaev18037826m.g	ALDH16A1.S	29.0826	31.5784	20.32	14.9943	17.7556	31.5784	0.920966	1	0.643479	0.474827	0.56227	aldh16a1.S	46.1707	35.2203	25.046	25.7628	15.8871	46.1707	1	0.762828	0.542466	0.55799	0.344095
Xelaev18037843m.g	MGC75752.S	74.4343	82.5332	61.538	41.6412	40.3285	82.5332	0.901871	1	0.745615	0.504539	0.488634	MGC75752.S	79.048	83.5879	70.141	56.861	29.614	83.5879	0.945687	1	0.839129	0.680254	0.354286
Xelaev18037955m.g	SDHB.S	50.7481	48.5874	44.8047	26.9868	24.0876	50.7481	1	0.957422	0.882883	0.531778	0.47465	sdhb.S	58.039	45.8539	31.2494	26.7552	26.9519	58.039	1	0.790053	0.53842	0.460987	0.464376
Xelaev18038022m.g	PSENEN.S	44.7369	49.5047	38.3534	28.086	24.4082	49.5047	0.903689	1	0.774743	0.56734	0.493048	psenen.S	50.0309	46.7133	37.6035	31.9126	23.2027	50.0309	1	0.93369	0.751605	0.637857	0.463768
Xelaev18038039m.g	FCGBP.S	39.6439	40.2954	30.6863	23.6323	25.0288	40.2954	0.983832	1	0.761535	0.586477	0.621134	fcgbp.S	62.8071	36.2834	29.7226	23.7985	22.2534	62.8071	1	0.577696	0.473237	0.378914	0.354314
Xelaev18038180m.g	XELAEV18038180M.G	64.2831	66.037	50.1247	31.8049	30.1494	66.037	0.97344	1	0.75904	0.481622	0.456553	Xelaev18038180m.g	62.0396	66.4957	51.0387	39.5613	28.9601	66.4957	0.932987	1	0.767549	0.594945	0.435519
Xelaev18038223m.g	TRUB2.L	43.9939	52.507	34.0536	24.3353	24.4695	52.507	0.837867	1	0.648552	0.463468	0.466023	trub2.L	53.2481	46.4207	33.5592	26.8321	18.5858	53.2481	1	0.871782	0.630242	0.503907	0.349042
Xelaev18038364m.g	GSN.L	61.5673	64.6771	46.5409	32.4806	28.3795	64.6771	0.951919	1	0.719589	0.502196	0.438787	gsn.L	67.1919	69.1193	49.2162	39.3936	31.7251	69.1193	0.972115	1	0.712046	0.569936	0.45899
Xelaev18038428m.g	PSMB7.L	49.4959	52.8904	33.9444	29.3155	28.0367	52.8904	0.93582	1	0.641788	0.554268	0.53009	psmb7.L	58.7717	49.0278	38.262	34.8946	21.0947	58.7717	1	0.834208	0.651028	0.593731	0.358925
Xelaev18038985m.g	WDR44.L	38.4927	41.5582	31.7415	20.9297	21.6587	41.5582	0.926235	1	0.763783	0.503624	0.521165	wdr44.L	48.611	40.6168	29.5326	22.6596	19.64	48.611	1	0.835546	0.607528	0.466141	0.404023
Xelaev18039099m.g	XELAEV18039099M.G	36.4148	43.2051	28.331	21.5874	21.7476	43.2051	0.842835	1	0.655732	0.499649	0.503356	Xelaev18039099m.g	47.9244	38.766	28.9083	19.7143	14.4407	47.9244	1	0.808898	0.603205	0.411362	0.301322
Xelaev18039152m.g	RNF5.L	41.7352	42.5989	35.3005	25.6385	23.5632	42.5989	0.979723	1	0.828672	0.601858	0.55314	rnf5.L	52.4614	41.3268	35.029	29.2332	21.9607	52.4614	1	0.787755	0.66771	0.557233	0.418607
Xelaev18039232m.g	MRPS18B.L	55.2453	56.5049	48.345	31.3897	26.7166	56.5049	0.977708	1	0.85559	0.555522	0.472819	mrps18b.L	49.2156	53.6494	44.1549	36.0158	25.22	53.6494	0.917356	1	0.823027	0.671317	0.470089
Xelaev18039350m.g	ATP5SL.L	44.1356	43.3153	33.6807	22.5772	17.2474	44.1356	1	0.981414	0.763118	0.511542	0.390783	atp5sl.L	49.5155	48.2389	40.2067	32.2813	18.2659	49.5155	1	0.974219	0.812003	0.651945	0.368893
Xelaev18039450m.g	EIF2B2.L	39.5117	43.4965	34.0012	24.8246	22.6765	43.4965	0.908387	1	0.7817	0.570727	0.52134	eif2b2.L	47.0101	41.6341	33.9045	33.974	17.0973	47.0101	1	0.885641	0.721216	0.722696	0.363695
Xelaev18039611m.g	FKBP3.L	70.7863	66.8738	41.7266	30.1797	27.9419	70.7863	1	0.944728	0.589473	0.426349	0.394736	fkbp3.L	75.8757	76.6143	58.1112	47.4585	34.0363	76.6143	0.990359	1	0.75849	0.619447	0.444255
Xelaev18039676m.g	PYGL.L	52.8455	52.1193	41.5205	29.7567	25.7737	52.8455	1	0.986257	0.785695	0.563088	0.487717	pygl.L	57.0748	55.7482	42.4419	30.0884	20.4767	57.0748	1	0.976757	0.743618	0.527175	0.35877
Xelaev18039722m.g	CKB.L	32.3209	33.1728	24.7441	18.1812	19.3277	33.1728	0.974318	1	0.745915	0.548077	0.582638	ckb.L	56.853	39.1772	29.113	21.1237	17.6316	56.853	1	0.689096	0.512075	0.37155	0.310126
Xelaev18039822m.g	PSMA3.L	48.0463	51.37	32.4777	25.6714	20.6056	51.37	0.935299	1	0.632231	0.499736	0.401121	psma3.L	50.3129	46.1581	34.6587	25.5868	27.5294	50.3129	1	0.917421	0.688863	0.508553	0.547164
Xelaev18039872m.g	DNAL1.L	39.6769	37.529	30.4294	24.8926	20.4656	39.6769	1	0.945865	0.766931	0.627383	0.515807	dnal1.L	51.1032	43.8525	38.535	32.1938	23.36	51.1032	1	0.858117	0.754062	0.629976	0.457114
Xelaev18040185m.g	LOC100485688.L	37.6032	38.6341	28.5544	19.3542	17.7961	38.6341	0.973316	1	0.739097	0.50096	0.460631	loc100485688.L	52.6885	37.835	29.4553	22.7628	17.6486	52.6885	1	0.718088	0.559045	0.432025	0.334962
Xelaev18040365m.g	XELAEV18040365M.G	39.8819	46.294	27.8431	18.5695	22.3833	46.294	0.861492	1	0.601442	0.401122	0.483504	Xelaev18040365m.g	52.1144	37.7682	33.1506	24.4776	19.8191	52.1144	1	0.724717	0.636112	0.469689	0.380301
Xelaev18040506m.g	MRPL24.L	47.5238	51.7606	37.3913	25.5312	22.7949	51.7606	0.918146	1	0.722389	0.493256	0.44039	mrpl24.L	36.9594	41.1863	29.6387	22.4584	16.6291	41.1863	0.897371	1	0.719625	0.545288	0.403752
Xelaev18040643m.g	COPA.L	71.4289	77.0287	49.247	39.3621	35.6667	77.0287	0.927302	1	0.639333	0.511006	0.463031	copa.L	77.6562	67.9009	58.9333	47.5189	23.8769	77.6562	1	0.874377	0.7589	0.611913	0.307469
Xelaev18040780m.g	NDUFS2.L	63.3752	64.561	43.1759	33.4333	27.8211	64.561	0.981632	1	0.668761	0.517855	0.430927	ndufs2.L	66.9088	67.3223	52.7743	38.0559	25.7555	67.3223	0.993858	1	0.783905	0.565279	0.38257
Xelaev18040886m.g	PSMB4.L	63.6007	74.7458	63.8333	41.2491	35.2558	74.7458	0.850893	1	0.854005	0.551858	0.471676	psmb4.L	75.0795	70.7986	67.9778	41.2929	36.9107	75.0795	1	0.942981	0.90541	0.549989	0.491621
Xelaev18040946m.g	XELAEV18040946M.G	46.9	51.8639	37.2218	25.0913	23.2869	51.8639	0.90429	1	0.717681	0.48379	0.449	Xelaev18040946m.g	58.519	52.2918	40.6765	33.2873	19.4505	58.519	1	0.893587	0.6951	0.568829	0.332378
Xelaev18041057m.g	FNTB.S	34.2915	34.5833	27.6593	20.0605	18.0183	34.5833	0.991564	1	0.799789	0.580063	0.521012	fntb.S	41.9003	36.578	30.6143	23.9485	16.7095	41.9003	1	0.872979	0.730648	0.57156	0.398793
Xelaev18041432m.g	LMO4.2.S	31.1774	33.7088	25.5241	17.3014	16.7881	33.7088	0.924904	1	0.757195	0.513261	0.498035	lmo4.2.S	49.1462	29.9341	22.6917	20.067	16.4717	49.1462	1	0.609083	0.461718	0.408313	0.335157
Xelaev18041434m.g	XELAEV18041434M.G	55.7145	57.4781	41.4529	26.7084	25.5146	57.4781	0.969316	1	0.721194	0.464671	0.4439	Xelaev18041434m.g	52.5978	56.7927	42.2052	33.6453	24.8086	56.7927	0.926137	1	0.743145	0.592422	0.436828
Xelaev18041585m.g	GSN.S	63.9791	68.8022	49.0495	32.943	28.7894	68.8022	0.929899	1	0.712906	0.478807	0.418437	gsn.S	58.5569	63.3409	47.082	32.1886	22.2667	63.3409	0.924473	1	0.743311	0.508181	0.351537
Xelaev18041679m.g	SH3GLB2.S	44.9906	47.3833	35.5946	18.4079	12.76	47.3833	0.949502	1	0.751205	0.388489	0.269293	sh3glb2.S	47.9114	41.6667	30.2079	25.9815	25.8627	47.9114	1	0.869661	0.630496	0.542282	0.539804
Xelaev18041887m.g	NAA10.S	43.7456	44.6727	30.5177	19.665	17.305	44.6727	0.979249	1	0.68314	0.440203	0.387373	naa10.S	49.56	42.9418	30.8766	25.4194	21.1597	49.56	1	0.866461	0.623015	0.512901	0.426951
Xelaev18041933m.g	LOC100489885.S	24.6783	28.7938	20.5452	16.0507	13.7994	28.7938	0.857071	1	0.713527	0.557436	0.47925	loc100489885.S	37.3589	23.9277	18.6141	15.3285	13.8962	37.3589	1	0.640483	0.498252	0.410305	0.371966
Xelaev18042144m.g	PSMD10.S	29.0285	33.3644	25.4274	17.8492	16.3041	33.3644	0.870045	1	0.762111	0.534978	0.488669	psmd10.S	33.9849	34.3851	25.7746	18.5152	16.038	34.3851	0.988363	1	0.749587	0.538465	0.466424
Xelaev18042145m.g	VSIG1.S	27.6016	32.6678	25.4439	17.5576	16.1908	32.6678	0.844919	1	0.778867	0.537458	0.495618	vsig1.S	33.774	33.5934	25.3344	18.4795	15.8381	33.774	1	0.994652	0.750116	0.54715	0.468944
Xelaev18042377m.g	SYMPK.S	40.6979	44.5131	28.0936	20.7902	19.3451	44.5131	0.914289	1	0.631131	0.467057	0.434593	sympk.S	54.5113	38.2152	28.8184	22.674	19.0439	54.5113	1	0.701051	0.528668	0.41595	0.349357
Xelaev18042803m.g	COPA.S	42.5294	49.3435	34.1841	23.7689	21.7236	49.3435	0.861904	1	0.692778	0.481702	0.440252	copa.S	54.5859	48.4384	34.0172	25.9579	25.9581	54.5859	1	0.887379	0.623186	0.475542	0.475545
Xelaev18042827m.g	TAGLN2.S	73.7273	74.5315	58.8274	42.5775	39.348	74.5315	0.98921	1	0.789296	0.571268	0.527938	tagln2.S	63.8753	69.1379	53.6655	36.1271	29.6093	69.1379	0.923884	1	0.77621	0.522537	0.428265
Xelaev18042875m.g	POLR3C.S	58.7534	56.0197	39.4545	30.8772	25.4194	58.7534	1	0.953472	0.671528	0.525539	0.432645	polr3c.S	73.7382	65.5854	45.4687	35.508	30.8158	73.7382	1	0.889437	0.616623	0.481542	0.417908
Xelaev18042878m.g	XELAEV18042878M.G	45.1871	47.0163	35.0897	23.6381	22.4874	47.0163	0.961096	1	0.746331	0.502763	0.478289	Xelaev18042878m.g	56.7638	49.555	39.575	33.4757	22.3102	56.7638	1	0.873004	0.697187	0.589737	0.393036
Xelaev18042888m.g	XELAEV18042888M.G	46.0471	48.8191	37.3783	24.9587	25.8769	48.8191	0.943218	1	0.765648	0.511248	0.530057	Xelaev18042888m.g	61.0469	52.0646	38.9604	32.4921	20.543	61.0469	1	0.852863	0.638204	0.532248	0.336511
Xelaev18042893m.g	NDUFS2.S	71.0373	71.7206	55.5303	40.1461	37.2101	71.7206	0.990473	1	0.774258	0.559756	0.518821	ndufs2.S	76.0201	77.5398	60.634	50.6038	31.8849	77.5398	0.980402	1	0.781973	0.652617	0.411207
Xelaev18042971m.g	MRPL9.S	44.7075	51.5932	39.5342	30.8728	24.7568	51.5932	0.86654	1	0.766269	0.598389	0.479845	mrpl9.S	65.0897	59.2205	50.7724	44.1787	22.9245	65.0897	1	0.909828	0.780037	0.678736	0.352199
Xelaev18043021m.g	PKLR.S	61.8254	64.8596	44.0458	31.9884	31.541	64.8596	0.953219	1	0.679095	0.493195	0.486296	pklr.S	63.8771	71.3273	54.4195	44.4733	21.5167	71.3273	0.895549	1	0.762955	0.62351	0.301661
Xelaev18043110m.g	KRT19.L	53.5586	55.6369	39.285	28.6676	24.3907	55.6369	0.962644	1	0.706095	0.515262	0.43839	krt19.L	65.469	57.5378	45.5777	35.2848	23.5262	65.469	1	0.878855	0.696172	0.538954	0.359348
Xelaev18043370m.g	NSF.L	31.0044	39.1637	25.5045	19.6147	17.4118	39.1637	0.791663	1	0.651229	0.500839	0.44459	nsf.L	42.8282	32.9389	28.4391	22.3125	16.6075	42.8282	1	0.769095	0.664028	0.520977	0.38777
Xelaev18043403m.g	CSE1L.L	52.3694	56.0823	41.7386	31.5789	27.1034	56.0823	0.933796	1	0.744239	0.563082	0.48328	cse1l.L	54.7748	48.0069	38.7071	26.2188	19.8339	54.7748	1	0.876443	0.706659	0.478665	0.362099
Xelaev18043520m.g	ADRM1.L	38.3972	42.6867	31.487	20.2461	19.3619	42.6867	0.899514	1	0.73763	0.474295	0.453582	adrm1.L	56.1075	41.3303	30.6608	24.3579	19.6846	56.1075	1	0.736627	0.546466	0.434129	0.350837
Xelaev18043527m.g	PSMA7.L	37.7866	42.0145	37.1809	22.1975	21.4885	42.0145	0.899369	1	0.884952	0.528328	0.511454	psma7.L	46.6191	43.2043	35.6286	27.4776	19.3537	46.6191	1	0.926751	0.764248	0.589407	0.415145
Xelaev18043637m.g	XELAEV18043637M.G	57.2818	56.6551	47.3348	29.4935	30.6214	57.2818	1	0.989059	0.826349	0.514884	0.534575	Xelaev18043637m.g	58.4696	59.7552	45.2398	34.8964	24.8305	59.7552	0.978484	1	0.757084	0.583989	0.415536
Xelaev18043643m.g	TMEM74B.L	65.1841	72.0086	57.6061	41.5153	38.8852	72.0086	0.905227	1	0.799989	0.576532	0.540009	tmem74b.L	76	74.6134	53.314	43.5877	33.0815	76	1	0.981755	0.7015	0.573522	0.435283
Xelaev18043644m.g	PSMF1.L	65.9955	71.1833	55.673	40.7333	38.7093	71.1833	0.927121	1	0.782107	0.572231	0.543797	psmf1.L	75.8936	73.9489	53.3055	43.4854	31.7678	75.8936	1	0.974376	0.702371	0.572978	0.418583
Xelaev18043710m.g	XELAEV18043710M.G	43.674	50.0138	32.5488	24.6931	21.2475	50.0138	0.873238	1	0.650795	0.493726	0.424833	Xelaev18043710m.g	46.4111	47.2385	31.3267	24.7766	17.129	47.2385	0.982486	1	0.66316	0.5245	0.362608
Xelaev18043837m.g	AARSD1.L	35.4583	36.0476	22.2917	16.9908	13.9706	36.0476	0.983653	1	0.618395	0.471344	0.387559	aarsd1.L	53.3153	40.5206	32.2169	32.2805	14.4	53.3153	1	0.760019	0.604271	0.605464	0.270091
Xelaev18044063m.g	AVD.2.L	66.3274	66.3472	54.3091	36.7932	33.3737	66.3472	0.999702	1	0.818559	0.554555	0.503017	avd.2.L	71.3088	64.0533	47.2353	38.2955	29.7993	71.3088	1	0.898252	0.662405	0.537038	0.417891
Xelaev18044314m.g	DDX18.L	36.7526	41.3875	29.5012	17.5057	17.7472	41.3875	0.888011	1	0.712804	0.422971	0.428806	ddx18.L	42.6378	35.1829	28.2167	20.4871	18.5342	42.6378	1	0.825156	0.661777	0.480491	0.434689
Xelaev18044321m.g	STEAP3.L	37.3404	48.6282	36.1768	25.3173	21.5049	48.6282	0.767876	1	0.743946	0.52063	0.44223	steap3.L	54.7019	43.4873	36.0479	29.4792	22.7738	54.7019	1	0.794987	0.658989	0.538906	0.416326
Xelaev18044322m.g	C2ORF76.L	36.7542	48.7897	35.1459	25.8349	21.6931	48.7897	0.75332	1	0.720357	0.529516	0.444624	c2orf76.L	52.7352	43.0598	35.8375	29.4545	23.0667	52.7352	1	0.816529	0.679575	0.558537	0.437406
Xelaev18044345m.g	XELAEV18044345M.G	46.9834	57.9896	38.0404	28.5739	25.7742	57.9896	0.810204	1	0.655987	0.492741	0.444462	Xelaev18044345m.g	59.7634	48.7931	35.5203	33.5	23.2246	59.7634	1	0.816438	0.594349	0.560544	0.38861
Xelaev18044383m.g	LOC100036800.L	79.3519	79.7164	64.2405	42.5279	37.4342	79.7164	0.995427	1	0.805863	0.53349	0.469592	loc100036800.L	73.3014	75.0304	57.8481	48.3149	21.9394	75.0304	0.976956	1	0.770995	0.643937	0.292407
Xelaev18044570m.g	LOC100491162.L	61.1477	59.0325	57.024	33.9818	37.6383	61.1477	1	0.965407	0.932562	0.555732	0.61553	loc100491162.L	65.8471	66.9658	53.3861	37.2523	21.3964	66.9658	0.983293	1	0.797214	0.556289	0.319512
Xelaev18044659m.g	ERICH2.L	44.8818	45.5119	35.0135	24.1959	24.1149	45.5119	0.986154	1	0.769326	0.531639	0.52986	erich2.L	56.4535	43.6099	37.1698	36.9378	23.2185	56.4535	1	0.772492	0.658414	0.654304	0.411285
Xelaev18044849m.g	ATIC.L	62.4939	61.2607	42.4516	29.4091	24.4558	62.4939	1	0.980266	0.679292	0.470591	0.391331	atic.L	62.4887	60.1372	41.4027	34.675	22.7203	62.4887	1	0.962369	0.662563	0.5549	0.363591
Xelaev18044958m.g	NDUFS1.L	63.2699	61.1543	49.5086	34.8324	31.4762	63.2699	1	0.966563	0.782498	0.550537	0.497492	ndufs1.L	63.338	62.1422	48.0427	38.6064	24.9171	63.338	1	0.98112	0.758513	0.60953	0.393399
Xelaev18045023m.g	HIBCH.L	59.5455	66.1256	48.5133	31.7153	24.5156	66.1256	0.90049	1	0.733653	0.479622	0.370743	hibch.L	65.8511	63.6614	50.0972	37.7898	24.8387	65.8511	1	0.966748	0.760764	0.573867	0.377195
Xelaev18045061m.g	KPNA7.L	62.5604	61.4634	58.7183	43.7465	36.3791	62.5604	1	0.982465	0.938587	0.699268	0.581505	kpna7.L	65.0507	63.7232	54.8978	43.4473	25.8889	65.0507	1	0.979593	0.843922	0.667899	0.39798
Xelaev18045189m.g	NOMO3.L	36.6683	30.7895	36.2683	15.7598	23.9632	36.6683	1	0.839675	0.989091	0.429793	0.653513	nomo3.L	41.1269	33.2872	29.97	23.2125	13.3774	41.1269	1	0.809379	0.728721	0.564412	0.325271
Xelaev18045497m.g	TSC2.L	46.4549	51.1038	41.723	30.6454	27.6598	51.1038	0.90903	1	0.816435	0.59967	0.541247	tsc2.L	53.8954	50.2903	41.1639	33.1128	22.6091	53.8954	1	0.93311	0.763774	0.614391	0.419499
Xelaev18045672m.g	PAQR4-LIKE.L	47.7682	47.4852	47.538	29.59	27.0431	47.7682	1	0.994075	0.99518	0.619449	0.566131	paqr4-like.L	57.6262	50.3133	43.4222	36.9118	24.1384	57.6262	1	0.873097	0.753514	0.640538	0.418878
Xelaev18046360m.g	SNPH.S	49.5385	56.8	46.0532	36.8239	27.4643	56.8	0.872156	1	0.810796	0.648308	0.483526	snph.S	56.8964	55.1015	47.4084	37.8446	24.0085	56.8964	1	0.968453	0.83324	0.665149	0.421969
Xelaev18046588m.g	MYL9.S	67.6957	77.7013	54.6775	32.2045	37.1576	77.7013	0.871229	1	0.703689	0.414465	0.478211	myl9.S	80.5642	79.1073	59.9534	45.8159	38.6584	80.5642	1	0.981916	0.744169	0.568688	0.479845
Xelaev18046628m.g	ERGIC3.S	34.3862	40.708	30.1233	22.2378	17.9486	40.708	0.844704	1	0.739987	0.546277	0.440911	ergic3.S	36.6869	42.1463	32.1902	23.9068	19.2137	42.1463	0.870465	1	0.763774	0.567235	0.455881
Xelaev18046687m.g	ICT1.S	36.7157	41.4985	27.3277	18.6497	17.4902	41.4985	0.884748	1	0.658523	0.449408	0.421466	ict1.S	47.8761	36.3329	27.0608	21.7924	20.434	47.8761	1	0.758894	0.565227	0.455184	0.42681
Xelaev18046688m.g	ATP5H.S	55.8345	57.7957	42.3108	32.6656	30.0919	57.7957	0.966067	1	0.732075	0.565192	0.520661	atp5h.S	55.2018	52.5698	40.0079	32.8252	23.0166	55.2018	1	0.952321	0.724757	0.594639	0.416954
Xelaev18046713m.g	H3F3B.S	42.0604	41.5116	23.2455	20.9575	22.1667	42.0604	1	0.986952	0.55267	0.498272	0.52702	h3f3b.S	49.7076	47.4885	36.1225	30.7572	18.682	49.7076	1	0.955358	0.726701	0.618763	0.375837
Xelaev18046897m.g	DDX18.S	35.6001	37.4631	30.1676	20.195	19.7286	37.4631	0.950271	1	0.805263	0.539065	0.526614	ddx18.S	44.8055	40.1248	33.3799	24.1722	19.414	44.8055	1	0.895533	0.744997	0.539493	0.433295
Xelaev18047272m.g	COPS8.S	70.7048	76.4487	49.041	33.3882	28.6	76.4487	0.924866	1	0.641489	0.436739	0.374107	cops8.S	72.6031	76.2513	58.704	45.7672	30.2468	76.2513	0.952155	1	0.769875	0.600215	0.396673
Xelaev18047295m.g	ATIC.S	55.078	56.8324	39.8141	27.8388	22.9571	56.8324	0.969131	1	0.700553	0.489841	0.403945	atic.S	59.5739	58.2879	46.327	33.542	19.5038	59.5739	1	0.978413	0.77764	0.563032	0.327389
Xelaev18047436m.g	KPNA7.S	73.8034	71.4033	64.762	46.4245	40.4097	73.8034	1	0.96748	0.877493	0.62903	0.547532	kpna7.S	73.3783	70.3516	60.7968	49.4046	32.6622	73.3783	1	0.958751	0.828539	0.673286	0.445121
Xelaev18047438m.g	ATP5J2.S	71.0224	76.4846	56.8854	38.5331	34.553	76.4846	0.928585	1	0.74375	0.503802	0.451764	atp5j2.S	70.3365	73.2497	61.1691	46.9935	37.5302	73.2497	0.96023	1	0.835076	0.641552	0.51236
Xelaev18047547m.g	EIF3B.S	49.0668	50.3292	37.9109	24.7746	23.3821	50.3292	0.974916	1	0.753259	0.492252	0.464583	eif3b.S	55.6386	51.9045	38.7313	28.9459	25.9087	55.6386	1	0.932886	0.696122	0.520248	0.46566
Xelaev18047659m.g	SCNN1B.S	44.8273	46.5406	30.473	25.4184	24.6204	46.5406	0.963187	1	0.654761	0.546154	0.529008	scnn1b.S	50.8493	42.9563	28.1473	26.1865	18.2041	50.8493	1	0.844776	0.553543	0.514983	0.358001

## Sheet: Mitochondria
Human Uniprot Accession #	Gene Description
Q6NVY1	3-hydroxyisobutyryl-CoA hydrolase(HIBCH)
P55809	3-oxoacid CoA-transferase 1(OXCT1)
P48047	ATP synthase, H+ transporting, mitochondrial F1 complex, O subunit(ATP5O)
P25705	ATP synthase, H+ transporting, mitochondrial F1 complex, alpha subunit 1, cardiac muscle(ATP5A1)
P06576	ATP synthase, H+ transporting, mitochondrial F1 complex, beta polypeptide(ATP5B)
P30049	ATP synthase, H+ transporting, mitochondrial F1 complex, delta subunit(ATP5D)
P24539	ATP synthase, H+ transporting, mitochondrial Fo complex subunit B1(ATP5F1)
O75947	ATP synthase, H+ transporting, mitochondrial Fo complex subunit D(ATP5H)
P56134	ATP synthase, H+ transporting, mitochondrial Fo complex subunit F2(ATP5J2)
Q9UII2	ATPase inhibitory factor 1(ATPIF1)
Q96DA6	DnaJ heat shock protein family (Hsp40) member C19(DNAJC19)
Q9Y3I1	F-box protein 7(FBXO7)
Q969Y2	GTP binding protein 3 (mitochondrial)(GTPBP3)
P28331	NADH:ubiquinone oxidoreductase core subunit S1(NDUFS1)
O75306	NADH:ubiquinone oxidoreductase core subunit S2(NDUFS2)
P49821	NADH:ubiquinone oxidoreductase core subunit V1(NDUFV1)
Q9P0J0	NADH:ubiquinone oxidoreductase subunit A13(NDUFA13)
Q16718	NADH:ubiquinone oxidoreductase subunit A5(NDUFA5)
Q16795	NADH:ubiquinone oxidoreductase subunit A9(NDUFA9)
O96000	NADH:ubiquinone oxidoreductase subunit B10(NDUFB10)
O95168	NADH:ubiquinone oxidoreductase subunit B4(NDUFB4)
Q9Y6M9	NADH:ubiquinone oxidoreductase subunit B9(NDUFB9)
O43920	NADH:ubiquinone oxidoreductase subunit S5(NDUFS5)
O75380	NADH:ubiquinone oxidoreductase subunit S6(NDUFS6)
O00483	NDUFA4, mitochondrial complex associated(NDUFA4)
Q9Y255	PRELI domain containing 1(PRELID1)
Q99497	Parkinsonism associated deglycase(PARK7)
Q9Y371	SH3 domain containing GRB2 like endophilin B1(SH3GLB1)
Q9NZC7	WW domain containing oxidoreductase(WWOX)
Q9NPH0	acid phosphatase 6, lysophosphatidic(ACP6)
P11310	acyl-CoA dehydrogenase, C-4 to C-12 straight chain(ACADM)
P49748	acyl-CoA dehydrogenase, very long chain(ACADVL)
Q9BUR5	apolipoprotein O(APOO)
Q6IMN6	caprin family member 2(CAPRIN2)
Q9HB07	chromosome 12 open reading frame 10(C12orf10)
Q5XKP0	chromosome 19 open reading frame 70(C19orf70)
P10606	cytochrome c oxidase subunit 5B(COX5B)
P14854	cytochrome c oxidase subunit 6B1(COX6B1)
P38117	electron transfer flavoprotein beta subunit(ETFB)
Q96A26	family with sequence similarity 162 member A(FAM162A)
Q9Y3D6	fission, mitochondrial 1(FIS1)
P41250	glycyl-tRNA synthetase(GARS)
P40926	malate dehydrogenase 2(MDH2)
Q15390	mitochondrial fission regulator 1(MTFR1)
Q9NWU5	mitochondrial ribosomal protein L22(MRPL22)
Q96A35	mitochondrial ribosomal protein L24(MRPL24)
Q9BYC8	mitochondrial ribosomal protein L32(MRPL32)
Q9HD33	mitochondrial ribosomal protein L47(MRPL47)
Q86TS9	mitochondrial ribosomal protein L52(MRPL52)
Q9BQC6	mitochondrial ribosomal protein L57(MRPL57)
Q14197	mitochondrial ribosomal protein L58(MRPL58)
Q9BYD2	mitochondrial ribosomal protein L9(MRPL9)
O60783	mitochondrial ribosomal protein S14(MRPS14)
Q9Y676	mitochondrial ribosomal protein S18B(MRPS18B)
P30044	peroxiredoxin 5(PRDX5)
Q99942	ring finger protein 5(RNF5)
O43772	solute carrier family 25 member 20(SLC25A20)
Q9NX18	succinate dehydrogenase complex assembly factor 2(SDHAF2)
P21912	succinate dehydrogenase complex iron sulfur subunit B(SDHB)
P53597	succinate-CoA ligase alpha subunit(SUCLG1)
P00441	superoxide dismutase 1, soluble(SOD1)
O94826	translocase of outer mitochondrial membrane 70(TOMM70)
A6NDV4	transmembrane protein 8B(TMEM8B)
O14949	ubiquinol-cytochrome c reductase complex III subunit VII(UQCRQ)
P45880	voltage dependent anion channel 2(VDAC2)

## Sheet: Protein Folding
Human Uniprot Accession #	Gene Description
Q96DA6	DnaJ heat shock protein family (Hsp40) member C19(DNAJC19)
Q9H3Z4	DnaJ heat shock protein family (Hsp40) member C5(DNAJC5)
Q99497	Parkinsonism associated deglycase(PARK7)
P49368	chaperonin containing TCP1 subunit 3(CCT3)
P50991	chaperonin containing TCP1 subunit 4(CCT4)
P48643	chaperonin containing TCP1 subunit 5(CCT5)
P40227	chaperonin containing TCP1 subunit 6A(CCT6A)
Q99832	chaperonin containing TCP1 subunit 7(CCT7)
P50990	chaperonin containing TCP1 subunit 8(CCT8)
P11142	heat shock protein family A (Hsp70) member 8(HSPA8)
O75832	proteasome 26S subunit, non-ATPase 10(PSMD10)
O00233	proteasome 26S subunit, non-ATPase 9(PSMD9)
Q9NX18	succinate dehydrogenase complex assembly factor 2(SDHAF2)
P50502	suppression of tumorigenicity 13 (colon carcinoma) (Hsp70 interacting protein)(ST13)
