# Supplementary material
Source: HighWire-hosted journal article supplement (doi:10.1101/rna.073247.119)
Supplement: Supplemental_Table_S5.xlsx [file Supplemental_Table_S5.xlsx]

## Sheet: Transcript Decreases
GeneName	sumNoPG.x	sumGPG90.x	sumMI.x	sumInter.x	sumMII.x	sumNoPG.y	sumGPG90.y	sumMI.y	sumInter.y	sumMII.y
ACTB.L	971.457	806.768	711.412	577.482	461.756	96.0496	71.5905	91.4421	56.4206	42.291
ACVR2B.L	134.234	146.531	115.108	80.4904	63.1478	15.3421	17.2736	9.33892	7.23649	6.67766
ALDH9A1.S	626.858	588.098	487.066	259.22	143.405	129.232	133.728	64.6241	23.6723	15.3662
ALDOA.L	484.224	490.027	307.953	262.535	152.801	39.6814	18.0257	35.3951	13.4017	6.34616
ALG14.S	44.0916	40.1915	24.9493	24.5991	21.2046	5.1042	5.3667	3.37228	1.85158	1.44815
ANGEL2.S	75.3828	76.5739	43.3305	41.05	33.7308	9.79637	12.3006	5.19241	3.05254	2.78703
ARL8B.S	19.4156	14.1879	10.0037	11.0856	7.25223	3.13915	3.22527	1.71883	1.00809	1.5063
ATP5A1.L	113.057	91.0144	64.8801	56.4333	49.7053	5.92954	3.17635	4.46493	2.88201	1.75537
ATP5D.S	90.0478	61.3957	72.1187	38.6201	37.7878	6.52408	4.41267	5.84017	2.37823	1.92462
ATXN3.L	59.0327	76.8009	39.958	38.4754	15.012	14.3993	20.639	6.31128	5.74907	4.33407
AUP1.S	14.9334	20.7807	11.0044	9.80989	9.98128	3.59004	4.40635	2.61664	1.18565	2.0013
B4GALT7.S	101.794	79.9952	65.1272	55.3557	33.2043	8.10356	11.6643	6.16104	3.20314	2.9856
BANF1.L	74.4339	65.8598	30.8953	33.2775	19.2513	6.23825	107.458	3.70371	2.04664	1.7047
BET1.S	93.7056	77.7944	68.9951	58.385	29.3401	12.2253	14.9466	7.13606	4.08571	2.83251
BIRC5.1.S	3050.75	2985.35	1983.13	1496.1	1740.4	649.6	866.74	461.685	123.017	104.888
BIRC5.2.L	300.424	289.237	211.901	189.166	120.553	30.8234	30.2138	17.4233	9.41128	11.6674
BIRC5.2.S	491.867	423.15	295.904	319.004	166.852	104.886	100.603	63.727	38.0263	28.84
BOLA2.L	292.382	347.812	279.966	239.038	165.21	49.4203	45.5459	48.6889	26.6266	17.4257
BPGM.S	24.5484	28.287	20.7495	12.024	12.6617	4.45993	2.90748	3.39697	1.45082	1.93422
C1ORF50.L	376.505	366.01	246.355	240.995	137.338	82.3522	91.4215	52.8409	36.8407	38.2394
CALHM2.S	66.2049	81.9209	42.1184	40.7616	26.1869	15.994	14.5109	10.4887	6.18915	6.26326
CCDC142.S	187.307	224.009	99.2899	100.328	86.9932	11.4526	12.7439	5.02049	2.46353	2.87165
CCNA2.L	351.116	347.425	207.218	156.493	146.286	44.6908	49.3284	30.0155	19.7155	11.1738
CCNA2.S	79.7228	93.9285	43.0343	48.0986	41.106	13.7608	10.0833	8.00616	6.25302	4.21293
CDC42EP2.L	194.97	183.181	111.78	117.234	57.6158	35.1608	44.356	28.6635	14.2025	17.2305
CDC6.L	2014.2	2151.34	1273.47	1071.01	703.007	280.703	317.104	116.52	43.5881	34.7247
CDC6.S	872.474	871.784	533.28	417.774	410.747	117.838	151.151	51.7808	43.9295	43.443
CDK7.L	42.1083	35.4386	31.492	24.0324	13.7624	7.66319	6.21312	4.52845	2.34878	1.90746
CHST12.L	8.80027	16.7672	8.73959	7.27126	3.7152	3.53547	4.25136	3.11672	1.67245	1.55611
CIDEC.L	23.6608	20.6089	16.8596	10.9143	8.34381	6.3532	5.75851	3.19867	2.84722	4.05605
CNDP2.S	110.448	94.2353	94.2702	75.7765	48.9177	16.1323	14.6212	13.2519	6.52226	5.6107
CNIH4.S	94.8222	82.4869	49.6355	44.3267	58.609	10.4187	9.70734	9.43998	3.06758	4.81467
COX4I1.S	67.7177	59.3662	61.5198	46.4235	27.3513	11.1091	6.27822	4.15981	5.07224	3.0664
COX6A1.S	302.941	226.346	188.105	139.367	118.985	36.6927	27.5051	17.0739	5.82036	4.30023
COX6C.L	63.8333	60.2122	36.346	39.2348	18.5271	7.37856	5.83604	6.56948	2.06936	1.09096
COX7A2.S	303.087	245.229	139.228	139.478	126.473	27.0013	12.3625	13.9556	10.6	7.37855
COX7B.L	254.978	204.345	156.45	104.591	99.2163	16.4998	10.3819	11.1955	4.12435	1.93235
CRY2.L	72.5768	77.0595	68.9987	44.4593	34.5598	15.7837	12.0593	8.60838	4.65124	2.35018
CTDNEP1.S	58.7569	49.9534	29.5378	17.0053	27.0429	5.31947	5.47482	4.36502	2.42389	1.66562
CTU2.L	1138.59	1000.59	642.628	544.915	591.454	175.768	141.619	45.0164	24.8758	15.5285
DAPK1.L	15.2402	17.155	11.9678	8.5931	5.93778	2.75962	3.02014	1.71189	1.20716	1.13117
DCTN2.L	50.7491	41.3363	29.4542	26.9685	15.903	5.63891	4.97962	5.55809	2.66153	2.64985
DCTN4.L	13.192	11.6049	10.3266	9.44094	5.93767	2.82922	1.8411	1.64345	1.6293	1.12612
DPH3.L	106.449	112.701	74.6352	53.2581	71.8821	17.5613	16.9368	6.93992	7.28086	6.52259
DPM2.L	46.9597	38.7169	23.7531	29.6163	18.6336	6.13758	3.46735	3.49481	1.36516	1.27921
DROSHA.L	90.6059	91.974	70.8454	57.0658	44.0929	10.8329	14.7387	10.2033	6.98485	4.85625
DTL.S	149.245	169.802	117.076	103.346	77.6213	13.1203	21.4994	11.9925	6.74526	5.12456
EAF2.S	34.231	25.0367	19.5684	18.0579	15.938	6.14203	4.91698	3.97477	2.1512	1.92729
EIF3H.S	184.067	156.979	131.262	104.847	46.8718	30.3037	28.8417	21.9897	12.9342	9.94136
ETHE1.L	82.0826	70.5011	58.4853	54.9571	33.3201	13.9368	11.3117	7.53889	2.85511	3.0688
EXD3.L	176.745	143.405	91.3296	89.7732	77.7697	133.004	20.7946	4.24595	2.91771	1.36589
EXOSC4.S	63.912	66.3185	50.2208	35.7456	28.1003	11.4382	4.6207	4.83795	1.83534	1.88676
EXT2.L	42.3929	34.7691	27.7123	20.2855	16.7342	12.8149	15.3466	6.35137	4.81738	5.86262
FAM26D.L	25.1614	19.0414	14.967	12.6433	10.9434	3.73721	3.4824	2.35154	1.80022	2.00603
FAM96B.S	127.099	84.5142	76.7694	60.1812	58.0372	9.75551	4.80943	5.25113	4.31053	2.01958
FBL.S	462.374	493.768	317.471	273.626	231.496	120.667	125.078	64.8859	42.5241	39.2253
FBXO15.S	228.994	254.403	89.3261	101.272	85.245	27.2994	19.3003	31.5908	5.78757	7.55498
FBXW8.L	31.7217	33.5643	26.5035	18.9406	11.7555	4.81783	4.51889	2.75337	1.37324	2.13619
FDPS.L	75.7395	87.3258	61.6455	52.729	42.5634	13.0886	10.5817	9.39246	4.12492	3.20285
FGFR1.S	195.866	194.119	148.102	146.285	93.6956	50.1679	57.2051	30.4808	24.1026	26.9352
FGFR1OP2.S	159.574	164.576	126.803	102.898	74.8342	25.7521	23.7112	19.4595	8.00946	7.44962
FLAD1.L	29.481	21.5803	16.5022	13.3528	12.7695	4.63316	5.21721	4.26931	1.96281	1.32597
FPGS.L	95.0207	89.3279	69.2381	47.9452	17.7206	13.2741	10.3191	9.22565	3.75606	2.66528
FYTTD1.S	22.9625	19.9792	18.0622	16.4862	11.2198	5.08711	5.55559	2.97291	1.80474	2.04797
GALT.S	71.4467	56.7004	47.2242	40.8079	34.2762	9.41414	5.66136	9.30051	3.3513	2.10804
GAPDH.L	748.063	692.286	516.717	479.697	281.062	90.2638	73.0717	76.3587	27.0828	12.5342
GLUD1.S	16.7234	18.896	14.8791	10.3751	6.20318	3.59148	3.13476	2.21882	1.55071	1.21234
GNA11.S	135.215	132.294	112.772	88.4115	67.3728	29.324	32.0531	21.8031	15.6973	10.8125
GNG4.S	14.3605	24.512	11.7082	10.92	9.1342	3.87633	4.51936	3.09591	2.04488	3.16423
GPD2.S	17.9534	33.5533	8.4603	6.4996	7.36084	72.2562	29.535	15.799	1.15031	1.11685
GPR180.S	6.06438	4.10287	5.70776	3.13075	1.91314	1.72889	2.54015	1.53371	1.49893	1.10663
GPSM1.L	60.6783	50.6392	42.1971	36.4	28.753	9.75223	7.18255	4.56724	1.75342	1.83688
GRN.L	927.842	1158.26	574.846	606.385	591.94	13.8855	19.9367	20.7131	8.9643	10.2327
GSK3A.L	105.907	107.917	74.8602	64.211	49.4763	19.2067	27.3024	16.2489	13.2981	15.0054
GSTO1.S	23.5447	35.9593	29.6315	12.5899	13.8483	13.9152	11.8669	5.40604	1.70609	1.50204
GTF2A1.L	72.5047	64.9612	37.4239	35.0654	37.0643	3.71523	5.19709	2.34039	1.62268	2.64338
HDAC8.L	863.607	968.27	709.406	465.52	728.313	170.6	113.388	87.0015	27.925	37.506
HELZ.L	130.983	133.047	105.596	84.1486	57.339	25.1025	29.084	18.1345	12.9363	13.8639
HMGN2.L	1348.25	1271.56	920.622	718.611	603.198	171.499	164.383	102.974	52.6522	34.61
HMMR.L	2655.46	3069.03	1810.89	1514.95	1056.07	309.577	390.153	133.034	118.023	122.166
HNRNPA1.S	5147.99	6415.41	4295.4	3314.04	2936.61	677.387	705.296	234.692	66.6632	116.171
HNRNPA2B1.L	3967.63	4563.25	3367.55	2662.26	2266.83	1017.05	975.762	779.699	476.81	290.954
HS3ST1.L	63.5782	51.8731	34.4689	30.9105	28.5686	6.70758	5.51467	4.63992	3.00876	3.56042
IER2.S	329.736	292.643	230.226	191.522	115.856	34.1382	30.5474	22.3671	7.91992	4.04722
IER5.S	26.5924	25.9187	20.081	16.4677	7.35467	3.35659	3.02704	2.50393	1.66852	1.21604
IFRD1.S	32.652	36.929	19.0642	19.0025	16.5964	5.58767	5.98301	5.04794	2.7025	2.89954
IMPDH2.S	80.8735	79.0621	60.5621	39.1765	53.23	13.9663	10.393	3.64608	3.2001	3.84327
INPP5A.1.S	68.0018	67.3799	59.044	44.5007	33.5534	8.94147	10.2692	5.59036	3.25713	4.15678
IRF2BP2.L	45.0748	41.7951	29.2086	25.4288	20.623	8.47274	11.9425	5.1773	4.54802	5.53385
JAG1.L	7.36732	11.0789	8.0607	5.06595	4.48995	2.98154	3.59387	3.5215	1.72445	1.81383
KCNK5.S	54.404	40.3392	29.0298	27.3654	23.2588	7.23603	8.69744	3.68944	3.92676	4.31948
KCTD10.S	54.4135	58.7156	38.7746	33.6566	26.2076	11.183	9.04323	7.11765	3.7601	4.66314
KIAA0101.S	260.453	231.939	166.621	142.019	106.553	41.3946	24.1774	19.9412	12.417	6.71984
KIAA0226L.L	54.295	52.7818	35.3714	29.8951	23.3582	6.64783	7.27719	4.7287	3.44369	3.97496
KIAA1429.L	261.567	284.932	173.83	132.294	203.531	31.6343	30.9943	9.70098	7.37606	12.64
KRTCAP2.L	2062.89	2109.37	2156.51	1184.08	838.567	292.084	195.604	222.129	101.947	34.7278
LLGL2.L	152.235	224.642	97.5342	82.1607	98.5023	26.8442	27.3496	15.254	6.69239	8.41938
LMNB1.L	1819.3	2144.59	1644.01	1342.55	815.818	218.248	258.768	100.557	61.8247	53.6641
LMNB1.S	110.789	145.446	109.062	96.6848	67.4654	43.0568	59.0143	28.3164	22.121	23.833
LOC100137619	355.144	373.561	263.888	231.236	146.944	48.0642	53.6396	27.3216	10.4723	9.33641
LOC100487104.S	464.305	341.746	240.956	170.703	58.5285	52.1758	48.8052	32.614	11.9307	3.80763
LOC100490530.L	75.2352	73.8492	42.9268	43.506	35.1393	8.76574	5.8345	8.08011	4.53539	3.34838
LOC108697326	66.9954	65.4585	42.033	40.8186	25.9827	4.27154	3.76123	2.91439	2.64454	1.59812
LOC108698206	36.9036	38.8277	20.8311	13.878	13.5164	3.70241	2.64442	3.43126	1.29566	1.41644
LOC108698215	71.6277	51.7066	55.7798	28.8067	28.3397	7.38404	5.59364	6.41558	1.71291	1.37578
LOC108699471	64.6065	69.1943	48.591	35.0656	27.4589	9.86335	11.2858	5.11865	2.23213	2.16291
LOC108699996	70.9431	54.9369	16.2153	17.6805	15.0644	16.2047	23.4008	10.3134	6.96496	6.95681
LOC108700795	18.5892	13.1683	8.48583	10.9792	7.17376	4.15641	3.08071	3.8611	2.22983	1.768
LOC108700938	308.856	217.413	140.095	135.432	99.0932	44.4239	34.9444	41.9414	18.2627	11.2304
LOC108703571	100.064	85.5568	58.3493	48.5494	24.9286	8.89391	3.9456	3.83971	1.53044	1.13218
LOC108703794	320.536	303.506	202.065	163.988	35.5685	45.1676	50.0274	34.2765	9.35404	8.76517
LOC108704202	277.613	277.027	165.915	151.289	130.986	34.2858	40.2951	18.9168	14.1506	14.2125
LOC108705274	1262.27	1245.21	736.43	641.577	154.861	90.1725	81.9187	44.4417	19.6071	13.5094
LOC108705579	104.087	100.49	68.8238	63.462	24.0441	22.6724	20.4007	9.42715	4.53668	3.60723
LOC108705671	308.614	276.858	209.55	137.374	41.9331	151.317	142.988	82.9033	28.1485	16.2522
LOC108705673	16.1441	15.2696	10.9206	5.6339	1.09942	17.6209	19.6157	7.41458	2.41885	1.15847
LOC108707062	197.123	168.073	143.75	91.5201	70.5915	21.336	13.9245	17.0382	8.52806	7.68383
LOC108709168	140.832	128.907	90.9773	88.3838	49.4286	40.2782	45.7798	22.149	17.8953	15.7736
LOC108709644	41.9208	46.3432	23.8647	23.769	16.463	5.6058	6.12683	3.68378	2.39005	1.83646
LOC108710689	124.323	122.581	69.1098	39.4427	58.1857	8.63008	11.4247	13.3239	5.54979	5.22434
LOC108710854	236.431	207.026	106.473	73.3828	152.355	20.368	8.99455	5.70858	6.22723	3.59089
LOC108711265	71.6621	67.3292	40.8457	46.1892	33.8192	12.5559	9.01985	13.2164	5.68201	3.79622
LOC108711300	49.0632	53.7676	39.128	34.4064	21.7498	6.56537	7.81783	4.49013	2.58625	1.98663
LOC108711724	141.39	130.068	110.612	96.1927	62.6298	28.9205	17.1152	14.5499	7.2291	3.6128
LOC108713263	40.5486	37.5228	30.1155	29.7734	17.7327	11.5287	16.8313	10.4852	7.11006	5.66418
LOC108713290	206.466	178.861	160.008	138.311	92.5105	42.5037	65.9399	44.4917	31.7164	28.2113
LOC108713808	83.025	69.6249	59.4848	50.5791	30.5643	11.1569	10.0136	6.5137	3.03415	1.99624
LOC108713913	808.851	757.085	633.033	408.832	314.15	42.6672	31.3835	35.7882	16.8861	5.26745
LOC108716062	84.6111	86.0165	55.7381	51.0552	25.065	23.3753	36.212	25.1004	23.4154	15.4349
LOC108716545	28.2813	38.9276	22.1843	17.6227	10.045	13.5523	18.7425	7.15727	5.52146	4.08463
LOC108717645	165.162	156.244	90.0327	77.7182	40.5718	38.1026	41.9415	40.0772	24.8734	19.3867
LOC108717918	160.468	184.234	123.722	85.3631	66.7093	18.151	12.4049	6.25848	4.70598	3.07278
LOC108718037	40.6966	41.2813	28.5555	29.8299	19.7166	4.26409	5.60337	3.15952	2.44262	2.17535
LOC108719129	53.1697	48.2259	37.2379	24.1691	24.5351	9.06529	9.58787	5.07519	3.14488	2.16413
LOC443712	35.6397	33.058	15.7201	12.0935	20.4231	4.00178	3.55262	1.88579	1.1868	1.29743
LRP1.S	90.3826	117.907	67.1673	61.8552	50.4347	18.5614	22.5897	15.8564	12.3656	10.7558
LSM3.L	242.91	179.07	146.986	104.975	127.833	20.5576	12.5287	9.91346	5.73694	3.09107
LSM3.S	389.169	367.383	186.023	213.409	156.788	25.713	26.6066	18.337	6.17452	2.31432
LSM6.S	103.948	78.1465	69.8701	40.3222	21.5211	14.6169	6.70131	5.94589	3.67777	2.53615
LYSMD1.S	83.1775	78.6535	73.8656	59.0581	37.1498	14.4796	11.1983	6.02451	3.04333	1.93956
LYSMD2.L	108.627	92.7005	54.1589	56.2381	42.8943	15.0356	18.3779	6.99835	4.82846	4.4022
MALSU1.L	55.3431	36.7562	35.0498	28.9707	26.4648	9.53446	4.66868	6.31849	1.81362	1.32495
MAPKAPK2.S	171.6	187.253	145.386	122.119	80.1818	46.6347	55.1282	31.3982	27.4279	17.7473
MAT2A.S	75.9933	69.6517	45.1873	45.7311	36.4986	13.2263	12.4929	10.7817	7.95997	5.62488
MED18.S	107.746	95.5656	80.293	64.5873	42.4512	11.9376	10.3618	6.46641	2.90108	1.69903
MEPCE.L	58.9772	52.8968	31.0603	29.1426	21.1185	6.99378	4.507	4.84292	2.10857	1.9399
MGC80416	161.648	180.082	103.302	75.7308	44.4804	17.2976	21.0361	6.32926	1.80654	2.04703
MGC83618	56.8805	56.6	32.3601	32.2425	23.8149	31.6627	36.1313	13.2712	10.3609	10.2397
MMGT1.S	428.396	372.184	257.585	260.916	212.941	82.8414	52.2915	49.1091	29.0553	28.8117
MRPL10.S	355.883	307.237	286.813	201.388	153.834	54.9003	34.9566	36.9692	20.4711	7.74552
MRPL14.L	265.452	239.549	206.187	172.419	124.101	18.2063	17.6408	15.7939	7.4085	4.28097
MRPL34.L	148.86	128.725	101.216	94.914	74.329	22.1886	18.5456	11.2662	12.9415	6.83744
MRPL41.L	140.566	139.503	127.125	98.9257	66.6121	27.6001	29.1703	15.2992	5.70137	5.65366
MRPL57.S	106.31	87.2151	67.9485	40.6916	56.2224	12.0936	6.80065	8.32444	3.85331	1.39358
MRPS12.L	20.6768	16.2332	16.5994	14.9767	8.76235	5.52481	5.03752	4.67537	3.5423	2.62331
MTCL1.L	21.0845	19.6396	19.047	11.1431	6.98672	11.9948	9.30212	3.44148	3.30857	4.68183
MYL6.L	62.1791	36.3829	34.6198	34.2022	21.6862	9.29711	7.00262	8.14782	4.11868	5.45248
NCALD.S	50.9553	41.6174	48.5191	26.0144	21.6206	5.545	5.39463	6.78599	1.46404	2.61442
NCK1.S	38.6993	30.0994	24.6762	24.9363	17.3971	4.14884	2.66711	2.88678	2.54066	1.58603
NCKAP5L.S	120.158	113.593	77.0134	63.6795	57.8736	11.3776	14.973	8.44085	7.19779	6.94628
NEK4.S	37.9425	36.1605	29.7032	27.673	18.7995	5.25955	4.98884	4.02961	3.26929	2.23319
NPEPL1.S	124.8	119.909	101.174	97.1699	59.0029	13.2551	9.43817	12.6836	3.47933	3.91944
NQO1.L	85.0869	75.4181	74.4854	48.2961	33.6132	6.28008	4.7993	4.31123	1.69577	1.16528
NSEP1	582.443	565.838	308.462	299.497	172.698	169.701	157.938	94.4112	77.2531	75.4856
OSGEPL1.L	106.977	122.185	71.7087	52.4502	56.8152	10.2371	6.72302	11.6006	4.22694	2.4118
PABPN1L.S	223.417	152.401	166.974	83.9162	81.1991	11.9888	13.9953	7.31358	5.89589	3.24509
PDE4D-LIKE.L	77.2126	83.6327	63.9172	58.7674	36.4865	17.3502	21.1093	12.4637	10.9391	10.2263
PDS5A.S	835.88	832.398	563.488	564.085	390.587	217.381	213.878	79.4429	79.2424	81.5494
PIH1D1.L	1885.49	1433.05	1850.97	1252.94	862.843	337.893	119.526	222.696	64.908	16.5112
PIP5K1A.S	45.0761	54.2228	34.1758	31.0581	16.1334	8.95676	9.1549	5.6204	2.95684	2.68143
PLSCR3.L	98.1388	100.425	110.61	45.5744	37.971	8.46456	4.41123	5.60749	4.09255	2.09368
POC1A.L	981.651	1010.79	744.774	503.535	408.736	179.17	180.042	53.6428	27.5043	17.0156
POGLUT1.L	34.8344	34.4693	20.8092	17.335	16.5292	7.00244	4.92896	3.46692	3.37388	1.91125
POU5F3.2.L	152.357	172.956	84.8382	81.4722	26.947	39.9991	42.1137	15.9569	5.94179	5.08838
PPIA.L	214.414	200.079	182.579	124.073	90.3489	43.3916	29.1459	34.319	17.1516	7.14304
PRDX2.L	690.618	500.222	695.646	427.863	316.794	85.3578	74.8708	92.1287	38.7464	27.8181
PREB.L	39.9552	44.3897	29.8949	21.4288	32.4467	7.14233	7.49006	6.73983	2.21054	2.55526
PROSER1.L	3.98965	3.11673	2.69474	2.22951	1.20201	2.9666	3.63691	1.80779	1.93542	1.98514
PRPF6.S	232.84	208.153	162.715	109.155	104.976	39.8778	30.5898	14.625	7.58115	6.02395
PSMA3.L	148.255	96.4448	106.312	80.5422	61.4249	14.7681	17.3021	18.156	9.2227	8.15107
PSMB3.L	57.4193	61.9071	53.7513	39.7082	27.0486	6.98787	5.45317	2.78833	1.6982	1.59129
PSMB3.S	144.813	126.155	109.536	82.1726	64.4545	24.5197	19.3223	19.2647	11.3299	8.02059
PSMG1.L	63.0781	71.4004	39.0728	30.4884	26.3262	5.05435	2.9248	5.48035	1.43303	1.34282
PSMG3.L	234.529	211.966	181.498	112.399	93.0831	14.3662	12.9272	10.4294	4.46885	1.77163
PTDSS2.S	38.3752	35.3273	26.6345	16.34	12.2892	12.0959	14.0607	9.29941	6.39311	3.35928
RAB21.S	71.6548	79.9963	67.1125	45.3657	39.6054	10.3415	10.6501	8.83888	7.03334	5.25646
RABGAP1L.S	87.0887	74.0672	57.5757	42.1192	46.0857	24.5385	20.011	4.55757	5.19383	6.50254
RAD21.L	446.185	446.868	291.771	238.583	155.924	85.9472	102.714	35.6007	25.9914	28.3308
RAP2B.S	71.7752	68.624	47.4231	42.8953	25.3228	11.1272	13.427	5.64229	3.3386	2.08558
RBMX.L	30.1263	28.0409	17.8386	13.2293	17.7314	2.24894	3.51397	2.43815	1.21648	1.77881
REEP3.S	1002.16	1333.87	627.087	495.144	516.774	102.66	101.829	84.7438	46.1722	31.3548
RHOU.L	49.0722	47.7122	31.5059	27.874	10.9952	8.53445	7.46226	3.58725	2.53291	1.80589
RNF167.S	49.6935	39.7963	27.9132	16.6679	16.2244	11.8537	8.97425	7.32479	3.07318	1.71675
RNF181.S	56.0443	46.4519	39.9609	35.6297	14.6992	16.0757	12.1593	8.52063	3.54993	2.51333
RNF214.L	560.635	163.364	159.155	144.964	83.8485	20.6793	27.029	21.421	11.9755	12.3349
RPL18.S	126.172	137.822	117.946	68.4687	58.2609	31.4749	15.6237	27.4523	10.4547	3.32086
RPL27A.L	196.632	154.13	125.432	115.417	76.3835	18.6057	12.5649	15.5437	8.08665	2.68881
RPL27A.S	397.733	443.048	311.796	247.358	149.118	38.2332	34.608	40.2405	13.5287	9.98383
RPL37A.L	1256.28	999.847	898.061	875.593	507.173	164.887	120.768	142.805	84.9526	63.3147
RPL39.S	435.315	399.213	352.431	296.822	165.638	55.5997	25.6205	39.9965	16.345	14.0908
RPL39.S	435.315	399.213	352.431	296.822	165.638	63.7208	35.6662	28.8427	32.6118	12.6848
RPL39.S	435.315	399.213	352.431	296.822	165.638	55.5997	25.6205	39.9965	16.345	14.0908
RPL39.S	435.315	399.213	352.431	296.822	165.638	63.7208	35.6662	28.8427	32.6118	12.6848
RPL39.S	435.315	399.213	352.431	296.822	165.638	55.5997	25.6205	39.9965	16.345	14.0908
RPL39.S	435.315	399.213	352.431	296.822	165.638	63.7208	35.6662	28.8427	32.6118	12.6848
RPL39.S	435.315	399.213	352.431	296.822	165.638	55.5997	25.6205	39.9965	16.345	14.0908
RPL39.S	435.315	399.213	352.431	296.822	165.638	63.7208	35.6662	28.8427	32.6118	12.6848
RPL39.S	350.677	350.678	256.567	195.272	160.744	55.5997	25.6205	39.9965	16.345	14.0908
RPL39.S	350.677	350.678	256.567	195.272	160.744	63.7208	35.6662	28.8427	32.6118	12.6848
RPL39.S	350.677	350.678	256.567	195.272	160.744	55.5997	25.6205	39.9965	16.345	14.0908
RPL39.S	350.677	350.678	256.567	195.272	160.744	63.7208	35.6662	28.8427	32.6118	12.6848
RPL39.S	350.677	350.678	256.567	195.272	160.744	55.5997	25.6205	39.9965	16.345	14.0908
RPL39.S	350.677	350.678	256.567	195.272	160.744	63.7208	35.6662	28.8427	32.6118	12.6848
RPL39.S	350.677	350.678	256.567	195.272	160.744	55.5997	25.6205	39.9965	16.345	14.0908
RPL39.S	350.677	350.678	256.567	195.272	160.744	63.7208	35.6662	28.8427	32.6118	12.6848
RPL8.L	172.779	135.03	128.677	71.5245	66.9342	17.7867	17.5044	9.95467	8.43585	7.65373
RPL9.L	313.756	278.028	224.699	172.502	140.755	40.527	22.0915	30.3954	11.4954	3.53446
RPS13.L	987.518	917.477	878.93	700.51	486.58	153.001	97.7821	135.262	65.5741	51.4651
RPS16.L	256.161	250.244	145.869	151.074	117.448	24.2411	12.497	13.2672	6.95797	5.47675
RPS16.S	1723.69	1120.7	1160.85	993.746	508.724	258.15	151.103	253.189	123.668	72.1915
RPS28P9.L	569.268	465.456	512.24	352.309	280.929	49.4909	44.887	46.4125	22.451	13.0948
RPSA.L	6683.32	4922.95	6197.86	3764.93	2758.4	1103.13	665.351	803.406	307.064	202.396
RPSA.S	4440.05	4995.38	3165.73	2391.83	2024.13	800.995	430.606	739.989	220.505	61.8229
RQCD1.L	32.4567	25.371	19.8786	10.2942	14.8985	4.53976	2.39636	1.70758	1.72777	1.28994
RUVBL2	41.7114	44.9204	25.1256	22.3945	10.5416	6.70486	7.42583	7.2757	3.09384	3.24696
SAP18.L	170.063	132.863	154.288	100.803	77.2347	28.214	28.3937	12.0077	9.30572	7.89313
SDF2.L	60.8462	49.3572	31.3027	27.5363	21.6154	9.66761	6.18074	2.8371	2.01388	1.19457
SERTAD3.L	67.7321	65.5469	46.2038	37.5884	29.7783	9.02567	9.42858	6.73613	4.41941	3.82087
SLC25A19.L	116.297	24.6745	15.5298	16.5089	10.4281	3.18959	3.33841	2.09151	1.71993	1.54587
SLC26A6.L	456.522	452.01	294.803	245.546	177.778	100.103	115.124	56.8135	35.3958	29.0733
SLC30A1.S	59.0859	56.6729	39.8213	42.7413	27.6043	10.4128	7.86816	7.83931	4.0922	4.37213
SLC35B1.L	28.0273	27.1586	15.4618	17.266	10.3827	8.83371	9.10359	5.14598	3.8274	4.27615
SLIRP.L	55.5735	52.9991	44.301	23.9317	24.5293	7.59974	4.96591	5.12362	3.9986	2.42911
SOAT2.S	187.267	236.272	118.75	117.435	124.814	24.787	37.4719	19.4715	8.12752	5.3614
SOCS1.S	179.818	148.956	102.42	101.025	83.5924	22.0448	24.2617	11.5458	7.29654	7.57809
SPTSSA.S	137.754	106.166	75.5687	64.3625	55.5673	17.376	15.855	6.82801	4.35294	1.98716
STK35.S	126.354	110.21	79.6364	55.2851	57.4352	12.4902	9.13993	5.57403	3.86375	3.48549
SUV39H1.L	137.188	142.151	93.8088	88.3239	57.6395	17.6128	17.8881	9.1201	4.52468	2.78729
TBRG4.L	55.041	60.8215	39.3654	39.1344	29.4199	7.80375	7.17159	6.50902	3.50468	2.68695
TDP2.S	154.735	134.33	103.987	70.2617	103.182	13.0825	9.1102	3.71401	1.88498	1.83696
TIMM10B.S	65.798	60.3306	41.8946	31.0316	22.4135	7.69702	5.07192	5.33067	2.52745	1.51358
TMEM101.L	55.2351	55.0468	41.2714	26.786	17.7444	4.04927	7.82546	3.00884	1.06157	1.27676
TMEM11.L	75.6977	60.9615	58.2361	49.8943	26.6591	17.2273	13.4153	11.5585	6.59387	3.53072
TMEM53.S	69.0846	52.9201	36.5997	35.8339	21.11	14.6216	11.4804	3.73471	3.50694	2.51706
TOMM22.L	58.6556	44.4788	46.2897	28.3942	25.4201	6.92862	5.25624	5.67792	2.74872	1.60631
TPI1.L	1401.28	1118.09	1081.73	784.521	501.167	116.313	79.7058	110.774	25.7361	22.9181
TPP2.S	168.553	180.113	112.502	86.6503	93.5873	52.2794	49.6241	23.5225	16.7935	19.9288
TPST2.L	25.5957	25.8485	21.5074	17.7387	10.8313	3.33883	4.72476	1.91161	1.47239	1.04768
TRAFD1.L	46.737	43.8185	39.0168	34.5658	18.8943	5.47353	4.89885	3.24088	1.6849	1.85581
TRAP1.S	44.412	46.1025	30.8462	24.4973	20.3545	5.48734	8.14804	3.96582	3.07787	1.55006
TRAPPC1.L	26.7662	23.8187	18.7412	11.6488	14.2156	3.21812	2.45176	2.6842	1.50158	1.31911
TRIM62.S	19.8064	23.3075	22.4272	11.7095	10.12	3.3343	2.79275	3.43842	1.87448	1.42261
TRMT10A.L	85.4928	58.5646	39.2658	39.8406	33.8862	16.8068	14.9501	10.5801	6.64888	5.21503
TRUB2.L	129.64	122.742	79.4949	72.2571	52.0959	16.482	12.2366	10.8171	3.89915	2.34686
TSTD2.S	642.626	582.084	374.194	366.865	203.958	45.8865	55.4128	17.8026	10.3179	13.0439
TTYH3.S	35.026	29.4328	32.7424	20.1514	11.2319	5.40204	4.18525	3.45092	2.20896	1.98162
UBAP1.L	43.495	42.3853	27.4168	23.4472	19.1621	6.09386	4.96787	3.90407	2.51917	2.16918
UBE2B.L	36.5432	29.2587	23.067	12.9047	10.9291	3.77725	3.90996	2.47327	1.79599	1.00976
UCP2.S	120.13	95.4248	62.1169	52.0105	61.4024	10.1775	6.74277	5.75474	3.88668	2.81427
USP25.L	49.3571	50.2661	34.058	27.4247	21.4161	5.42608	7.50951	2.60634	1.47946	2.10962
VIMP.L	36.7696	31.5044	18.3408	20.2449	8.735	6.8598	4.99333	3.52387	2.05282	1.48472
WDR61.S	88.8609	66.457	52	41.0622	26.8543	9.06588	7.01475	4.4158	3.34636	3.49464
WDR83OS.S	36.5413	28.5773	19.8758	14.049	16.207	5.06956	3.38663	2.36759	2.43447	1.49182
WIPI1.L	29.8511	23.0611	14.505	14.0311	12.4499	3.56103	4.59535	2.71682	1.87604	2.25221
WIPI1.S	103.398	115.468	71.2419	63.2908	57.6227	24.5942	26.1957	21.5871	18.5214	12.3685
WNT5A.S	6.30481	6.97735	4.15589	3.16085	4.11401	2.99895	4.03776	2.31573	2.37094	1.61076
XELAEV18001464M	241.364	316.365	256.239	134.405	66.7455	87.3319	107.321	83.759	46.3734	36.3033
XELAEV18002919M	102.295	108.108	61.3681	58.7918	41.1815	17.3893	20.204	10.5553	9.89916	8.46229
XELAEV18009614M	72.4347	75.859	53.1936	42.8513	35.2672	8.36555	9.7852	5.22478	2.86388	1.88845
XELAEV18012446M	6.2923	8.7192	5.59304	3.97136	3.81966	3.23518	2.5551	1.54958	1.36076	1.57261
XELAEV18024221M	357.168	282.348	213.767	134.963	126.203	23.3866	15.5056	24.006	6.04316	4.0448
XELAEV18024346M	87.3162	70.62	52.826	46.8844	35.8617	10.0808	10.1335	5.44982	2.93982	3.67299
XELAEV18029805M	23.2613	23.9327	15.2638	11.7093	9.57922	8.8208	7.00022	5.17964	4.32271	3.65216
XELAEV18038074M	241.441	235.358	193.389	178.306	111.615	72.1998	99.314	53.9698	45.1184	45.812
XELAEV18038102M	27.5892	27.1391	16.4075	11.3546	6.9664	11.4109	10.5111	5.98004	1.58462	1.67047
XELAEV18047702M	2812.48	2368.66	1270.74	948.872	808.866	380.671	397.16	109.507	54.2577	37.5372
XPO4.L	31.3751	29.7462	19.8125	15.3854	14.9909	6.05234	5.42561	2.97626	2.19726	2.09269
XPO6.L	1153.69	1066.53	655.962	587.981	545.381	155.393	183.957	102.624	53.5913	50.0288
YBX1.S	1488.13	1375.24	836.055	891.016	611.991	461.094	339.801	139.628	111.57	124.202
ZC3H14.S	94.8443	124.613	40.1512	29.843	14.5939	9.37793	6.3282	4.19721	1.69921	2.26587
ZMYND19.L	181.637	174.829	135.811	132.334	84.0361	27.4393	21.5028	19.2011	10.112	6.91905
ZP3.S	58.0247	47.0822	30.2702	29.9808	15.8914	5.18205	4.57337	4.55414	2.37756	1.95321

## Sheet: Ribosome
Human Uniprot Accession #	Gene Description
Q7Z7H8	mitochondrial ribosomal protein L10(MRPL10)
Q6P1L8	mitochondrial ribosomal protein L14(MRPL14)
Q8IXM3	mitochondrial ribosomal protein L41(MRPL41)
Q9BQC6	mitochondrial ribosomal protein L57(MRPL57)
O15235	mitochondrial ribosomal protein S12(MRPS12)
Q07020	ribosomal protein L18(RPL18)
P46776	ribosomal protein L27a(RPL27A)
P61513	ribosomal protein L37a(RPL37A)
P62891	ribosomal protein L39(RPL39)
P62917	ribosomal protein L8(RPL8)
P32969	ribosomal protein L9(RPL9)
P62277	ribosomal protein S13(RPS13)
P62249	ribosomal protein S16(RPS16)
P62857	ribosomal protein S28(RPS28)
P08865	ribosomal protein SA(RPSA)
Q9HC21	solute carrier family 25 member 19(SLC25A19)
P55851	uncoupling protein 2(UCP2)

## Sheet: Mitochondria
Human uniprot Accession	Gene Description
P25705	ATP synthase, H+ transporting, mitochondrial F1 complex, alpha subunit 1, cardiac muscle(ATP5A1)
P30049	ATP synthase, H+ transporting, mitochondrial F1 complex, delta subunit(ATP5D)
O95571	ETHE1, persulfide dioxygenase(ETHE1)
Q9H4B0	O-sialoglycoprotein endopeptidase like 1(OSGEPL1)
Q9GZT3	SRA stem-loop interacting RNA binding protein(SLIRP)
Q12931	TNF receptor associated protein 1(TRAP1)
P30042	chromosome 21 open reading frame 33(C21orf33)
P13073	cytochrome c oxidase subunit 4I1(COX4I1)
P12074	cytochrome c oxidase subunit 6A1(COX6A1)
P09669	cytochrome c oxidase subunit 6C(COX6C)
P14406	cytochrome c oxidase subunit 7A2(COX7A2)
P24311	cytochrome c oxidase subunit 7B(COX7B)
Q8NFF5	flavin adenine dinucleotide synthetase 1(FLAD1)
Q05932	folylpolyglutamate synthase(FPGS)
P00367	glutamate dehydrogenase 1(GLUD1)
P43304	glycerol-3-phosphate dehydrogenase 2(GPD2)
Q96EH3	mitochondrial assembly of ribosomal large subunit 1(MALSU1)
Q7Z7H8	mitochondrial ribosomal protein L10(MRPL10)
Q6P1L8	mitochondrial ribosomal protein L14(MRPL14)
Q8IXM3	mitochondrial ribosomal protein L41(MRPL41)
Q9BQC6	mitochondrial ribosomal protein L57(MRPL57)
O15235	mitochondrial ribosomal protein S12(MRPS12)
P30405	peptidylprolyl isomerase F(PPIF)
Q9NRY6	phospholipid scramblase 3(PLSCR3)
Q9HC21	solute carrier family 25 member 19(SLC25A19)
Q969Z0	transforming growth factor beta regulator 4(TBRG4)
Q9Y5J6	translocase of inner mitochondrial membrane 10B(TIMM10B)
P17152	transmembrane protein 11(TMEM11)
Q9UDW1	ubiquinol-cytochrome c reductase, complex III subunit X(UQCR10)
P55851	uncoupling protein 2(UCP2)
