# Supplementary material
Source: HighWire-hosted journal article supplement (doi:10.1101/rna.073247.119)
Supplement: Supplemental_Table_S7.xlsx [file Supplemental_Table_S7.xlsx]

## Sheet: Translation Decrease
gene	noPGpolyper.x	PG90polyper.x	MIpolyper.x	Intpolyper.x	MIIpolyper.x	noPGpolyper.y	PG90polyper.y	MIpolyper.y	Intpolyper.y	MIIpolyper.y	noPGAvg	PG90Avg	MIAvg	IntAvg	MIIAvg
ABCF1-LIKE.L	0.376039	0.338586	0.274638	0.194773	0.197133	0.510567	0.389701	0.426782	0.372869	0.286337	0.443303	0.364144	0.35071	0.283821	0.241735
ACBD3.L	0.418761	0.372875	0.306047	0.193127	0.250545	0.427615	0.359481	0.389093	0.330364	0.217885	0.423188	0.366178	0.34757	0.261745	0.234215
ACVR1B.L	0.448999	0.357831	0.286528	0.32916	0.250952	0.375062	0.348369	0.30018	0.318844	0.257137	0.41203	0.3531	0.293354	0.324002	0.254044
ACVR2A.S	0.478129	0.365461	0.3223	0.328597	0.286867	0.375496	0.34948	0.267867	0.288614	0.263381	0.426812	0.357471	0.295084	0.308605	0.275124
ACVR2B.S	0.288504	0.327442	0.209834	0.199875	0.140573	0.356022	0.352711	0.255601	0.207477	0.199928	0.322263	0.340077	0.232718	0.203676	0.17025
ADAMTS6.L	0.406991	0.37068	0.206117	0.201034	0.214513	0.273787	0.243208	0.215354	0.162184	0.162661	0.340389	0.306944	0.210735	0.181609	0.188587
ADCK4-LIKE.L	0.445794	0.38505	0.278254	0.227891	0.176259	0.390912	0.409436	0.304412	0.346377	0.275501	0.418353	0.397243	0.291333	0.287134	0.22588
AHCY.L	0.486074	0.266016	0.191546	0.162392	0.217157	0.301343	0.293504	0.242902	0.19777	0.10887	0.393709	0.27976	0.217224	0.180081	0.163014
AHDC1.S	0.295747	0.235	0.149211	0.191045	0.132216	0.302993	0.322351	0.232073	0.251068	0.152621	0.29937	0.278675	0.190642	0.221057	0.142418
AHSA1.S	0.307037	0.332317	0.291104	0.205626	0.156605	0.269134	0.31562	0.203731	0.255258	0.185151	0.288085	0.323969	0.247418	0.230442	0.170878
AIFM1.L	0.315999	0.355857	0.273624	0.18848	0.207558	0.414117	0.2926	0.358941	0.240597	0.206842	0.365058	0.324228	0.316282	0.214539	0.2072
AIMP1.L	0.398773	0.279206	0.321025	0.271116	0.194389	0.448397	0.365929	0.381525	0.262231	0.22163	0.423585	0.322567	0.351275	0.266673	0.20801
AIMP1.S	0.261756	0.246263	0.185662	0.180705	0.150958	0.338031	0.290736	0.261809	0.206395	0.138397	0.299894	0.2685	0.223735	0.19355	0.144677
AKR1B1.L	0.288661	0.44276	0.27238	0.262842	0.126681	0.404937	0.258601	0.364753	0.226461	0.13989	0.346799	0.350681	0.318566	0.244652	0.133286
AMD1.L	0.330295	0.304782	0.239777	0.196508	0.168761	0.362392	0.294874	0.222746	0.216018	0.183761	0.346344	0.299828	0.231262	0.206263	0.176261
AMOT.L	0.38049	0.336099	0.223575	0.3193	0.161087	0.347734	0.332161	0.274493	0.184809	0.170625	0.364112	0.33413	0.249034	0.252054	0.165856
ANAPC13.1.L	0.187397	0.225502	0.217828	0.160416	0.119634	0.31678	0.392613	0.311297	0.214447	0.198473	0.252088	0.309058	0.264562	0.187432	0.159054
ANKRD27-LIKE.L	0.342272	0.369512	0.276309	0.229795	0.202604	0.369408	0.395371	0.255048	0.17119	0.187261	0.35584	0.382441	0.265678	0.200492	0.194933
ANKRD32.L	0.402826	0.294927	0.242308	0.176462	0.207637	0.401165	0.363338	0.339848	0.29934	0.253711	0.401995	0.329133	0.291078	0.237901	0.230674
ANXA1-LIKE.1.L	0.587762	0.582436	0.413306	0.373521	0.301797	0.448611	0.312325	0.380038	0.329531	0.264866	0.518186	0.447381	0.396672	0.351526	0.283331
ANXA1-LIKE.1.S	0.28493	0.416557	0.249027	0.201986	0.178563	0.432218	0.341603	0.35812	0.189577	0.155648	0.358574	0.37908	0.303573	0.195781	0.167106
ANXA3.L	0.400542	0.315805	0.286825	0.19484	0.231479	0.385319	0.288079	0.327629	0.201215	0.162312	0.39293	0.301942	0.307227	0.198027	0.196896
ANXA7.L	0.395568	0.218133	0.272452	0.252526	0.14603	0.305525	0.260378	0.216542	0.155246	0.188187	0.350547	0.239255	0.244497	0.203886	0.167108
AP5M1.L	0.31419	0.244915	0.16597	0.137594	0.108121	0.311891	0.347255	0.246573	0.15876	0.208882	0.31304	0.296085	0.206271	0.148177	0.158501
APOO.L	0.272439	0.202903	0.20852	0.155566	0.0847892	0.384534	0.308966	0.285596	0.197129	0.202765	0.328487	0.255935	0.247058	0.176348	0.143777
APOPT1.L	0.326511	0.299868	0.296901	0.227063	0.138974	0.385908	0.372296	0.342141	0.25573	0.193942	0.356209	0.336082	0.319521	0.241397	0.166458
ARF4.S	0.431235	0.312832	0.25525	0.301934	0.184228	0.325729	0.298633	0.244665	0.22637	0.259077	0.378482	0.305732	0.249958	0.264152	0.221653
ARFGEF2-LIKE.L	0.448817	0.254086	0.363951	0.293113	0.165213	0.322561	0.298776	0.309553	0.22436	0.178842	0.385689	0.276431	0.336752	0.258736	0.172027
ARFGEF2-LIKE.S	0.397153	0.287238	0.267142	0.256623	0.173575	0.352046	0.371165	0.325707	0.277527	0.266266	0.3746	0.329202	0.296424	0.267075	0.219921
ARHGAP20.L	0.453357	0.386246	0.290528	0.319743	0.247436	0.341722	0.354957	0.257815	0.257898	0.161628	0.397539	0.370601	0.274171	0.288821	0.204532
ARHGEF12.L	0.387646	0.230782	0.257603	0.218713	0.121311	0.26321	0.301024	0.302192	0.271398	0.183033	0.325428	0.265903	0.279898	0.245056	0.152172
ARID3B.L	0.430946	0.425006	0.322462	0.293776	0.29053	0.45726	0.430942	0.328197	0.401468	0.292305	0.444103	0.427974	0.325329	0.347622	0.291417
ARIH1.S	0.266825	0.278632	0.175464	0.176563	0.142288	0.333786	0.223057	0.239682	0.280747	0.150009	0.300306	0.250845	0.207573	0.228655	0.146149
ARL10B.S	0.38861	0.333909	0.273406	0.252297	0.126885	0.317247	0.308099	0.180827	0.161865	0.205051	0.352929	0.321004	0.227117	0.207081	0.165968
ARRDC3.S	0.350545	0.260075	0.20443	0.198013	0.0730907	0.272308	0.303317	0.198667	0.169532	0.190887	0.311427	0.281696	0.201549	0.183773	0.131989
ASPSCR1.S	0.458954	0.314593	0.279309	0.254313	0.225585	0.353121	0.381245	0.373888	0.290032	0.220185	0.406037	0.347919	0.326599	0.272173	0.222885
ATF2.L	0.42962	0.265774	0.244673	0.239584	0.152074	0.335265	0.30417	0.30887	0.251608	0.21653	0.382443	0.284972	0.276772	0.245596	0.184302
ATG3.L	0.145259	0.274316	0.142197	0.100933	0.0728841	0.346299	0.439297	0.319448	0.244719	0.234336	0.245779	0.356807	0.230822	0.172826	0.15361
ATL3.L	0.401933	0.278151	0.411132	0.231127	0.160933	0.342806	0.303043	0.277687	0.29189	0.217195	0.372369	0.290597	0.344409	0.261508	0.189064
ATP5F1.L	0.343373	0.492782	0.319163	0.273582	0.208838	0.396197	0.325529	0.355165	0.361248	0.22192	0.369785	0.409155	0.337164	0.317415	0.215379
ATP5J.L	0.381675	0.592012	0.633196	0.25194	0.326691	0.469655	0.459062	0.490637	0.345622	0.284628	0.425665	0.525537	0.561917	0.298781	0.305659
ATP5J.S	0.554319	0.383281	0.312227	0.299962	0.266889	0.503201	0.412424	0.416215	0.443704	0.304033	0.52876	0.397852	0.364221	0.371833	0.285461
ATP5O.L	0.395237	0.502923	0.253007	0.264627	0.348873	0.520829	0.43171	0.451584	0.333327	0.172135	0.458033	0.467316	0.352296	0.298977	0.260504
ATP6V0B.L	0.518436	0.617132	0.503706	0.250703	0.365171	0.290056	0.330161	0.258534	0.258274	0.197625	0.404246	0.473646	0.38112	0.254489	0.281398
ATXN1-LIKE.S	0.455713	0.331042	0.471887	0.264676	0.282558	0.498698	0.488343	0.377857	0.392328	0.321283	0.477205	0.409693	0.424872	0.328502	0.30192
AVD.2.L	0.333706	0.339874	0.334198	0.188392	0.265468	0.403775	0.350687	0.262216	0.273393	0.170832	0.36874	0.345281	0.298207	0.230892	0.21815
BAHD1.L	0.377587	0.310808	0.259508	0.193251	0.176673	0.389631	0.346525	0.261976	0.298056	0.23573	0.383609	0.328666	0.260742	0.245653	0.206201
BAIAP2L1.S	0.262407	0.271201	0.237388	0.171444	0.120822	0.316731	0.259526	0.262447	0.219336	0.155121	0.289569	0.265364	0.249918	0.19539	0.137971
BOLA2.1	0.281106	0.408319	0.223348	0.0282764	0.0347368	0.390369	0.30655	0.215933	0.195043	0.160795	0.335737	0.357434	0.21964	0.11166	0.0977659
BPGM.L	0.461604	0.404415	0.20435	0.23617	0.190732	0.263031	0.240067	0.294873	0.229295	0.19146	0.362317	0.322241	0.249611	0.232733	0.191096
BUB3.L	0.440651	0.309486	0.228539	0.230047	0.19627	0.342329	0.346021	0.282172	0.29541	0.266113	0.39149	0.327754	0.255355	0.262729	0.231192
C11ORF48.S	0.346145	0.318796	0.303283	0.285116	0.184474	0.476245	0.412281	0.358959	0.296396	0.185385	0.411195	0.365538	0.331121	0.290756	0.18493
C12ORF49.L	0.411751	0.42007	0.258413	0.273859	0.1432	0.344779	0.32786	0.309075	0.267495	0.230942	0.378265	0.373965	0.283744	0.270677	0.187071
C16ORF52.S	0.385206	0.333531	0.300907	0.277306	0.147687	0.300671	0.319262	0.274795	0.278281	0.233525	0.342938	0.326397	0.287851	0.277794	0.190606
C18ORF25.L	0.306318	0.612505	0.379177	0.29969	0.164966	0.325548	0.322758	0.360258	0.256995	0.265543	0.315933	0.467631	0.369718	0.278342	0.215255
C21ORF59-LIKE.S	0.392281	0.455957	0.307392	0.224884	0.23035	0.406893	0.306122	0.442195	0.302708	0.244201	0.399587	0.38104	0.374793	0.263796	0.237275
C7ORF55.L	0.523002	0.233119	0.270525	0.0464011	0.130852	0.391919	0.369096	0.331969	0.387353	0.229134	0.457461	0.301108	0.301247	0.216877	0.179993
CAPZA2.S	0.349416	0.262071	0.221277	0.229667	0.155462	0.298122	0.277037	0.327356	0.273264	0.145168	0.323769	0.269554	0.274316	0.251466	0.150315
CAST.L	0.286911	0.368211	0.25715	0.218731	0.151856	0.411274	0.327127	0.255857	0.3244	0.193565	0.349092	0.347669	0.256503	0.271565	0.17271
CCDC104.L	0.281223	0.189997	0.220357	0.145995	0.17391	0.32922	0.310537	0.294662	0.166889	0.123915	0.305221	0.250267	0.257509	0.156442	0.148912
CCDC11.L	0.394924	0.31928	0.185433	0.141309	0.264293	0.401821	0.309401	0.374761	0.345293	0.240697	0.398372	0.314341	0.280097	0.243301	0.252495
CCDC124.L	0.429355	0.37422	0.322025	0.241174	0.225302	0.447427	0.362618	0.409906	0.339879	0.216231	0.438391	0.368419	0.365966	0.290526	0.220767
CCDC124.S	0.354542	0.441469	0.245664	0.220345	0.185584	0.495101	0.447466	0.452184	0.361985	0.287328	0.424822	0.444467	0.348924	0.291165	0.236456
CCDC135.L	0.313901	0.311008	0.261481	0.147991	0.170301	0.457891	0.229222	0.215411	0.254391	0.159179	0.385896	0.270115	0.238446	0.201191	0.16474
CCDC15.S	0.351877	0.290532	0.213334	0.190698	0.166881	0.370154	0.350426	0.313577	0.251981	0.189745	0.361015	0.320479	0.263456	0.221339	0.178313
CCDC167.S	0.433129	0.329761	0.333354	0.263415	0.1689	0.49044	0.496516	0.490496	0.425699	0.382487	0.461784	0.413138	0.411925	0.344557	0.275694
CCT2.L	0.419321	0.541194	0.432044	0.371099	0.287187	0.446474	0.354578	0.45244	0.278051	0.202526	0.432898	0.447886	0.442242	0.324575	0.244857
CCT2.S	0.559247	0.492385	0.553577	0.382788	0.270233	0.501109	0.342112	0.452085	0.28278	0.196636	0.530178	0.417249	0.502831	0.332784	0.233434
CCT6A.S	0.374633	0.263414	0.256614	0.322745	0.155646	0.345753	0.252276	0.278344	0.22027	0.220457	0.360193	0.257845	0.267479	0.271508	0.188051
CCT8.L	0.475503	0.421846	0.401394	0.385914	0.400449	0.381013	0.312113	0.395202	0.319684	0.15486	0.428258	0.36698	0.398298	0.352799	0.277655
CDC73.S	0.329993	0.361523	0.253081	0.265993	0.163749	0.341451	0.289716	0.321814	0.252376	0.179801	0.335722	0.325619	0.287447	0.259185	0.171775
CDCA5.S	0.31924	0.339544	0.276188	0.200972	0.134689	0.280444	0.302792	0.261997	0.227077	0.167759	0.299842	0.321168	0.269093	0.214024	0.151224
CDK1.L	0.419068	0.373566	0.238255	0.227089	0.127594	0.382736	0.340715	0.393034	0.384805	0.370615	0.400902	0.35714	0.315644	0.305947	0.249105
CFL1.S	0.491481	0.429298	0.274876	0.274767	0.209626	0.434709	0.309397	0.377536	0.247534	0.182504	0.463095	0.369348	0.326206	0.26115	0.196065
CHCHD3.L	0.281876	0.371188	0.141675	0.247892	0.132003	0.348189	0.32879	0.384984	0.28122	0.186567	0.315032	0.349989	0.26333	0.264556	0.159285
CHCHD4.L	0.313966	0.134554	0.116352	0.156267	0.0841073	0.252426	0.31122	0.207433	0.197137	0.160094	0.283196	0.222887	0.161892	0.176702	0.122101
CHD8.L	0.323705	0.349652	0.272813	0.244208	0.171466	0.349927	0.384081	0.317403	0.319442	0.249719	0.336816	0.366866	0.295108	0.281825	0.210592
CHEK1.S	0.487872	0.505477	0.346691	0.328408	0.154112	0.46823	0.407116	0.447918	0.365175	0.290396	0.478051	0.456297	0.397305	0.346791	0.222254
CHMP2B.L	0.380812	0.331573	0.312155	0.209945	0.153721	0.441034	0.399808	0.436758	0.39281	0.355487	0.410923	0.365691	0.374457	0.301378	0.254604
CIAO1.S	0.39434	0.364378	0.362721	0.238755	0.201743	0.338124	0.296454	0.221105	0.15513	0.16164	0.366232	0.330416	0.291913	0.196942	0.181692
CLIC1.S	0.221217	0.387059	0.249164	0.220912	0.0916423	0.267657	0.302653	0.373719	0.192064	0.254025	0.244437	0.344856	0.311442	0.206488	0.172834
CLPTM1-LIKE.L	0.389317	0.191502	0.24909	0.182156	0.163097	0.204342	0.225647	0.173092	0.106471	0.112822	0.296829	0.208574	0.211091	0.144313	0.137959
CLUH.L	0.446193	0.417893	0.364292	0.244342	0.238664	0.362538	0.302091	0.297298	0.271888	0.248839	0.404366	0.359992	0.330795	0.258115	0.243752
CNOT1.S	0.345717	0.327453	0.315457	0.212616	0.175624	0.422943	0.388417	0.372864	0.384476	0.244946	0.38433	0.357935	0.34416	0.298546	0.210285
CNPY2.S	0.327245	0.301329	0.249249	0.203722	0.109485	0.332756	0.486722	0.28092	0.216195	0.060776	0.33	0.394025	0.265084	0.209959	0.0851304
COG1.S	0.434667	0.385924	0.227619	0.289489	0.151842	0.338223	0.380254	0.348603	0.30122	0.254892	0.386445	0.383089	0.288111	0.295354	0.203367
COMMD10.L	0.481535	0.358484	0.264779	0.307917	0.158446	0.216761	0.248173	0.152833	0.176006	0.14677	0.349148	0.303329	0.208806	0.241961	0.152608
COX5A.S	0.336866	0.420382	0.333633	0.207477	0.327274	0.385314	0.344016	0.296169	0.260223	0.086137	0.36109	0.382199	0.314901	0.23385	0.206706
COX5B.2-LIKE.L	0.413114	0.33964	0.308703	0.290616	0.199684	0.469358	0.426914	0.462678	0.369605	0.279579	0.441236	0.383277	0.38569	0.33011	0.239631
COX6B1.L	0.479977	0.398972	0.173809	0.242232	0.158575	0.490437	0.39195	0.426754	0.422177	0.273272	0.485207	0.395461	0.300281	0.332204	0.215924
COX7A2.L	0.365285	0.319552	0.213942	0.101483	0.140379	0.372602	0.405728	0.351583	0.412468	0.221318	0.368944	0.36264	0.282763	0.256975	0.180848
CRTC3.L	0.484147	0.358663	0.162305	0.159733	0.189109	0.353486	0.336589	0.274902	0.248399	0.233957	0.418817	0.347626	0.218603	0.204066	0.211533
CSK.S	0.369321	0.245614	0.237122	0.143676	0.15352	0.263008	0.309435	0.23917	0.142507	0.155641	0.316165	0.277525	0.238146	0.143091	0.15458
CSRNP1.L	0.492221	0.402722	0.395961	0.391654	0.268171	0.371032	0.394606	0.319233	0.336216	0.279257	0.431627	0.398664	0.357597	0.363935	0.273714
CSTF2.L	0.544394	0.495287	0.421804	0.257309	0.212876	0.483477	0.434943	0.507319	0.426162	0.315123	0.513935	0.465115	0.464561	0.341735	0.263999
CTDSPL-LIKE.L	0.426901	0.329792	0.306416	0.276692	0.231669	0.377211	0.341324	0.252983	0.311983	0.227478	0.402056	0.335558	0.2797	0.294338	0.229573
CTDSPL-LIKE.S	0.381711	0.308693	0.23969	0.234037	0.169272	0.453507	0.401982	0.283036	0.311907	0.267862	0.417609	0.355338	0.261363	0.272972	0.218567
CTNS.L	0.387767	0.340071	0.428017	0.233781	0.177704	0.257884	0.304737	0.180441	0.226561	0.154776	0.322825	0.322404	0.304229	0.230171	0.16624
CUL4A.S	0.333762	0.299335	0.259316	0.219261	0.148296	0.386188	0.384795	0.313802	0.258103	0.228359	0.359975	0.342065	0.286559	0.238682	0.188327
CUX1.S	0.38655	0.229916	0.283872	0.221012	0.152842	0.293762	0.313472	0.229689	0.218334	0.218458	0.340156	0.271694	0.256781	0.219673	0.18565
CYTH2.L	0.483366	0.394621	0.348897	0.26605	0.192123	0.441678	0.42429	0.368719	0.353798	0.334386	0.462522	0.409456	0.358808	0.309924	0.263255
DAG1.S	0.362654	0.226846	0.201586	0.259356	0.152781	0.317409	0.313432	0.232471	0.239174	0.18992	0.340031	0.270139	0.217029	0.249265	0.17135
DAZAP1.S	0.493371	0.377929	0.289978	0.298178	0.199882	0.34817	0.360975	0.277272	0.332073	0.249231	0.420771	0.369452	0.283625	0.315126	0.224557
DAZAP2.S	0.594468	0.496663	0.408233	0.301796	0.279085	0.580729	0.473154	0.572146	0.477059	0.402995	0.587598	0.484908	0.490189	0.389427	0.34104
DAZL.L	0.603598	0.399658	0.243495	0.190942	0.236876	0.492517	0.485301	0.537352	0.554263	0.511414	0.548058	0.442479	0.390423	0.372602	0.374145
DCAF8.S	0.409133	0.350535	0.250491	0.326569	0.240365	0.462465	0.45859	0.418532	0.354937	0.220347	0.435799	0.404562	0.334511	0.340753	0.230356
DDX18.L	0.286603	0.262125	0.213844	0.210454	0.201166	0.372541	0.318477	0.311349	0.216702	0.150258	0.329572	0.290301	0.262597	0.213578	0.175712
DDX18.S	0.373655	0.359272	0.30872	0.208836	0.257788	0.416231	0.391931	0.417365	0.350703	0.196362	0.394943	0.375601	0.363042	0.279769	0.227075
DDX20.L	0.247651	0.348359	0.279985	0.163211	0.160289	0.286327	0.328072	0.276101	0.205832	0.18956	0.266989	0.338216	0.278043	0.184522	0.174924
DDX21.L	0.256618	0.213376	0.181031	0.127871	0.120025	0.335009	0.266955	0.236159	0.187167	0.159505	0.295813	0.240165	0.208595	0.157519	0.139765
DDX4.L	0.57181	0.383038	0.206347	0.196584	0.219521	0.509949	0.336507	0.296574	0.248728	0.198187	0.540879	0.359773	0.251461	0.222656	0.208854
DDX4.S	0.631436	0.546846	0.464291	0.244722	0.279064	0.557294	0.487542	0.553911	0.463758	0.404762	0.594365	0.517194	0.509101	0.35424	0.341913
DDX6.S	0.378331	0.273796	0.22358	0.205685	0.191604	0.352734	0.349913	0.242507	0.260409	0.223111	0.365532	0.311855	0.233043	0.233047	0.207357
DEDD.L	0.381423	0.294626	0.32276	0.287291	0.20546	0.380106	0.334715	0.286491	0.249222	0.239147	0.380765	0.31467	0.304625	0.268257	0.222303
DESI1.S	0.213028	0.171817	0.135745	0.146921	0.0904731	0.305697	0.271957	0.236264	0.181153	0.121338	0.259362	0.221887	0.186004	0.164037	0.105905
DGAT2.L	0.492648	0.445081	0.391068	0.198335	0.293205	0.414127	0.38623	0.326635	0.257943	0.362329	0.453388	0.415655	0.358851	0.228139	0.327767
DLGAP5.L	0.288	0.31417	0.211704	0.240275	0.169187	0.336056	0.41301	0.370453	0.277894	0.245714	0.312028	0.36359	0.291078	0.259084	0.207451
DOCK4.L	0.36484	0.274575	0.346485	0.272226	0.180688	0.362595	0.360681	0.358296	0.306321	0.228007	0.363718	0.317628	0.35239	0.289273	0.204348
DYRK1A.L	0.409994	0.34638	0.2336	0.150331	0.208392	0.405085	0.391638	0.222233	0.316252	0.191069	0.407539	0.369009	0.227916	0.233292	0.19973
E2F1.L	0.580047	0.460166	0.466895	0.314642	0.295652	0.552136	0.479002	0.517799	0.493716	0.460918	0.566092	0.469584	0.492347	0.404179	0.378285
EDEM3-LIKE.S	0.478374	0.343185	0.401363	0.29472	0.359008	0.37736	0.324367	0.259326	0.324491	0.187663	0.427867	0.333776	0.330345	0.309606	0.273336
EEF1G.L	0.339389	0.321109	0.229919	0.213273	0.191021	0.393079	0.31136	0.345259	0.2585	0.202846	0.366234	0.316234	0.287589	0.235886	0.196933
EEF2.1.S	0.453672	0.474616	0.232329	0.325753	0.226551	0.377246	0.326394	0.305082	0.225769	0.19122	0.415459	0.400505	0.268706	0.275761	0.208885
EIF2S3.L	0.396964	0.264897	0.332699	0.246698	0.123648	0.310022	0.348181	0.30081	0.253176	0.205682	0.353493	0.306539	0.316755	0.249937	0.164665
EIF4B.S	0.495902	0.468629	0.40482	0.290377	0.191475	0.35469	0.327193	0.32918	0.299477	0.193369	0.425296	0.397911	0.367	0.294927	0.192422
EIF4E-LIKE.1.S	0.395087	0.640113	0.370998	0.27817	0.262539	0.581986	0.577985	0.656187	0.593478	0.456267	0.488537	0.609049	0.513592	0.435824	0.359403
EIF4EBP2.S	0.325164	0.251691	0.231949	0.195755	0.181651	0.402644	0.316571	0.355128	0.294119	0.206187	0.363904	0.284131	0.293538	0.244937	0.193919
EIF5A.L	0.42869	0.340123	0.241423	0.199302	0.229395	0.306199	0.337337	0.318251	0.275297	0.173734	0.367444	0.33873	0.279837	0.237299	0.201564
ELAC2.L	0.465225	0.443535	0.309974	0.176038	0.227316	0.405614	0.358443	0.316006	0.266555	0.254276	0.435419	0.400989	0.31299	0.221296	0.240796
ELL2.L	0.31647	0.285223	0.243243	0.182774	0.141035	0.387759	0.313182	0.273978	0.251199	0.196216	0.352115	0.299203	0.25861	0.216986	0.168625
EMC2.S	0.344592	0.373814	0.27646	0.124552	0.169419	0.332612	0.262864	0.358465	0.19523	0.135864	0.338602	0.318339	0.317462	0.159891	0.152641
ERMP1.L	0.407429	0.302252	0.214915	0.227487	0.195177	0.287692	0.237471	0.22663	0.260236	0.130911	0.34756	0.269861	0.220773	0.243862	0.163044
ETFB.L	0.468812	0.344758	0.380612	0.308174	0.246479	0.475127	0.402771	0.403956	0.329236	0.259624	0.471969	0.373764	0.392284	0.318705	0.253052
EXOC1.S	0.325702	0.247658	0.215947	0.113684	0.150932	0.307501	0.29084	0.237096	0.153648	0.218164	0.316601	0.269249	0.226521	0.133666	0.184548
FAM172B.L	0.242228	0.233984	0.282488	0.170746	0.126679	0.368269	0.308549	0.296197	0.251431	0.177483	0.305248	0.271267	0.289343	0.211089	0.152081
FAM207A.L	0.305572	0.309269	0.273099	0.16453	0.169508	0.387136	0.307048	0.308996	0.235158	0.122427	0.346354	0.308159	0.291048	0.199844	0.145968
FAM20B.S	0.411277	0.318909	0.320365	0.302272	0.216605	0.406615	0.337254	0.299598	0.294638	0.277457	0.408946	0.328081	0.309982	0.298455	0.247031
FAM213B.L	0.324073	0.266037	0.141372	0.102579	0.148797	0.422226	0.347092	0.337896	0.263258	0.170449	0.373149	0.306564	0.239634	0.182919	0.159623
FAM46C.1	0.348944	0.323429	0.249667	0.259307	0.247312	0.419452	0.354777	0.341284	0.283639	0.194216	0.384198	0.339103	0.295476	0.271473	0.220764
FAM49B.L	0.414518	0.467595	0.298794	0.191265	0.298017	0.320144	0.328743	0.313051	0.282851	0.312108	0.367331	0.398169	0.305923	0.237058	0.305062
FAM53A.L	0.503281	0.313285	0.198225	0.256254	0.136721	0.384349	0.373964	0.24828	0.230077	0.212834	0.443815	0.343624	0.223253	0.243165	0.174778
FAM73B.L	0.383408	0.180479	0.282314	0.215689	0.13177	0.259402	0.315466	0.176599	0.197153	0.138249	0.321405	0.247973	0.229456	0.206421	0.13501
FAM83F.L	0.39613	0.243238	0.176768	0.215175	0.234517	0.391513	0.352398	0.357728	0.228012	0.182164	0.393821	0.297818	0.267248	0.221593	0.20834
FCHO1.S	0.397525	0.559386	0.287157	0.224105	0.344793	0.349416	0.285055	0.204444	0.213119	0.170403	0.37347	0.42222	0.2458	0.218612	0.257598
FHDC1.L	0.374336	0.305556	0.204753	0.211441	0.14448	0.30637	0.327499	0.245428	0.240331	0.176548	0.340353	0.316528	0.22509	0.225886	0.160514
FHOD1.L	0.437596	0.28417	0.222531	0.205011	0.208664	0.286904	0.2769	0.232265	0.224968	0.169299	0.36225	0.280535	0.227398	0.21499	0.188981
FKBP3.L	0.574772	0.492231	0.417106	0.307	0.149267	0.556887	0.455816	0.447706	0.386379	0.212182	0.565829	0.474024	0.432406	0.34669	0.180724
FNIP1-LIKE.L	0.422017	0.308156	0.226664	0.240071	0.126378	0.345777	0.333586	0.233904	0.248545	0.189965	0.383897	0.320871	0.230284	0.244308	0.158171
FOXK2.S	0.417499	0.284854	0.226029	0.244973	0.159669	0.317655	0.302932	0.19886	0.274849	0.163885	0.367577	0.293893	0.212444	0.259911	0.161777
FTSJ3.L	0.362871	0.313446	0.230984	0.187835	0.155897	0.410887	0.389115	0.376793	0.295354	0.23988	0.386879	0.351281	0.303888	0.241595	0.197888
GDI2.L	0.345868	0.377729	0.178019	0.233416	0.186527	0.33337	0.322261	0.242263	0.246111	0.162827	0.339619	0.349995	0.210141	0.239764	0.174677
GEMIN5-LIKE.L	0.498748	0.386818	0.300847	0.204109	0.263746	0.387516	0.335506	0.363659	0.248262	0.213211	0.443132	0.361162	0.332253	0.226185	0.238479
GIGYF1.L	0.395126	0.416864	0.278184	0.263462	0.206505	0.501425	0.431945	0.307082	0.398886	0.226988	0.448276	0.424405	0.292633	0.331174	0.216746
GIP.S	0.490605	0.328094	0.332274	0.296788	0.110443	0.384688	0.369387	0.308238	0.321787	0.203244	0.437647	0.34874	0.320256	0.309287	0.156844
GLRX5.S	0.433889	0.277738	0.360467	0.276794	0.174654	0.378863	0.364354	0.396622	0.319706	0.216137	0.406376	0.321046	0.378545	0.29825	0.195395
GLTSCR2.L	0.362947	0.292591	0.214943	0.220508	0.17657	0.37434	0.306465	0.320814	0.268197	0.187921	0.368644	0.299528	0.267879	0.244352	0.182246
GNG12.L	0.439083	0.254155	0.236287	0.247533	0.248543	0.297631	0.321961	0.240887	0.254042	0.152635	0.368357	0.288058	0.238587	0.250788	0.200589
GNS.L	0.436815	0.363618	0.332029	0.25241	0.206009	0.331402	0.309224	0.287127	0.266769	0.211739	0.384108	0.336421	0.309578	0.259589	0.208874
GPBP1L1.L	0.352206	0.308443	0.215626	0.123339	0.190864	0.32516	0.349671	0.303064	0.189669	0.238252	0.338683	0.329057	0.259345	0.156504	0.214558
GPR137C.S	0.448422	0.361215	0.277789	0.339337	0.251833	0.350596	0.361518	0.249648	0.248667	0.213883	0.399509	0.361366	0.263718	0.294002	0.232858
GRPEL2.L	0.397335	0.469217	0.327413	0.19092	0.20364	0.417286	0.431063	0.358003	0.437538	0.395413	0.407311	0.45014	0.342708	0.314229	0.299527
GTF3A.L	0.338238	0.300727	0.256937	0.169315	0.14653	0.347893	0.305192	0.241243	0.231193	0.173477	0.343066	0.30296	0.24909	0.200254	0.160003
GTPBP6.S	0.37953	0.580223	0.402927	0.263968	0.260994	0.519895	0.437699	0.487869	0.45961	0.443746	0.449712	0.508961	0.445398	0.361789	0.35237
HADH.L	0.480849	0.428711	0.227913	0.211762	0.192716	0.428076	0.330447	0.34472	0.31709	0.244816	0.454463	0.379579	0.286317	0.264426	0.218766
HAT1.L	0.310121	0.289716	0.223695	0.157544	0.17982	0.287783	0.36194	0.344986	0.186546	0.179314	0.298952	0.325828	0.28434	0.172045	0.179567
HAT1.S	0.414583	0.34568	0.112255	0.117299	0.218091	0.369911	0.33468	0.302759	0.288022	0.240672	0.392247	0.34018	0.207507	0.20266	0.229382
HDX.S	0.290169	0.232028	0.24152	0.14218	0.0721003	0.290319	0.265596	0.249241	0.24554	0.202672	0.290244	0.248812	0.24538	0.19386	0.137386
HELB.L	0.416006	0.31445	0.377907	0.318205	0.221986	0.3313	0.307688	0.295358	0.260751	0.167923	0.373653	0.311069	0.336633	0.289478	0.194954
HELZ.L	0.460384	0.346901	0.152683	0.177849	0.120143	0.443185	0.453043	0.240686	0.310012	0.180571	0.451784	0.399972	0.196685	0.243931	0.150357
HELZ.S	0.524596	0.360297	0.233312	0.163477	0.186773	0.421949	0.404126	0.221957	0.31557	0.216025	0.473272	0.382212	0.227634	0.239523	0.201399
HGS.L	0.398948	0.47371	0.27349	0.298623	0.220287	0.422575	0.374025	0.309423	0.310857	0.164884	0.410761	0.423868	0.291457	0.30474	0.192586
HIATL1.L	0.346487	0.278918	0.193167	0.119812	0.181649	0.318149	0.284302	0.287857	0.223136	0.192398	0.332318	0.28161	0.240512	0.171474	0.187024
HIATL1.S	0.302941	0.200643	0.183973	0.169478	0.182421	0.285748	0.26281	0.140816	0.256403	0.0814933	0.294344	0.231726	0.162394	0.21294	0.131957
HN1L.L	0.432966	0.222814	0.310639	0.23588	0.141446	0.297719	0.299588	0.201636	0.221812	0.184591	0.365343	0.261201	0.256137	0.228846	0.163018
HOMEZ.S	0.425038	0.295846	0.280114	0.265991	0.243075	0.366404	0.335551	0.290924	0.331338	0.230095	0.395721	0.315698	0.285519	0.298664	0.236585
HPGDS.S	0.4271	0.443737	0.265814	0.325076	0.259907	0.461728	0.380968	0.36988	0.289473	0.225112	0.444414	0.412352	0.317847	0.307275	0.24251
HSPA5.L	0.334342	0.483963	0.395769	0.348938	0.294972	0.340487	0.39924	0.302041	0.374909	0.237659	0.337414	0.441601	0.348905	0.361923	0.266315
HTATIP2.L	0.48109	0.41865	0.241463	0.178931	0.136847	0.351502	0.406684	0.385492	0.329083	0.360709	0.416296	0.412667	0.313477	0.254007	0.248778
IFT74.S	0.455905	0.415516	0.209491	0.156669	0.187025	0.442385	0.415886	0.425113	0.30252	0.223933	0.449145	0.415701	0.317302	0.229595	0.205479
IMMT-LIKE.L	0.278723	0.26182	0.275562	0.13774	0.228484	0.342056	0.255535	0.209137	0.175756	0.0823269	0.310389	0.258677	0.24235	0.156748	0.155406
ING3.S	0.415786	0.40869	0.367474	0.225413	0.201665	0.323555	0.270494	0.260494	0.200948	0.223724	0.36967	0.339592	0.313984	0.21318	0.212694
ITGB3BP-LIKE.L	0.309701	0.199763	0.402484	0.19228	0.0299822	0.39149	0.361774	0.290103	0.268653	0.279514	0.350596	0.280768	0.346293	0.230466	0.154748
ITM2A.S	0.454013	0.349963	0.415867	0.296634	0.193045	0.467115	0.443237	0.393459	0.329597	0.350463	0.460564	0.3966	0.404663	0.313115	0.271754
ITPK1.L	0.51585	0.393406	0.239222	0.242558	0.274333	0.356529	0.318253	0.382728	0.274038	0.276076	0.436189	0.35583	0.310975	0.258298	0.275205
JPH1.S	0.302837	0.165224	0.155127	0.226127	0.153333	0.28	0.276781	0.213397	0.185843	0.121651	0.291418	0.221002	0.184262	0.205985	0.137492
KARS.S	0.416787	0.304395	0.255578	0.219001	0.153037	0.368585	0.312696	0.274863	0.266494	0.210692	0.392686	0.308546	0.26522	0.242747	0.181864
KAT6A.L	0.429031	0.367686	0.278787	0.23159	0.206527	0.451883	0.441983	0.320966	0.35296	0.271252	0.440457	0.404835	0.299876	0.292275	0.238889
KAT6A.S	0.456405	0.321331	0.248773	0.258784	0.150268	0.477157	0.42034	0.299197	0.415021	0.293397	0.466781	0.370835	0.273985	0.336903	0.221833
KCMF1.S	0.479693	0.352685	0.292241	0.234313	0.149769	0.354227	0.354366	0.369846	0.330711	0.23087	0.41696	0.353525	0.331044	0.282512	0.190319
KCNJ5.L	0.553501	0.424996	0.356461	0.210129	0.164077	0.373534	0.379077	0.342852	0.37078	0.244054	0.463518	0.402036	0.349656	0.290454	0.204066
KIAA0020.S	0.352332	0.339567	0.300006	0.241555	0.19877	0.341714	0.327654	0.279918	0.227759	0.171712	0.347023	0.333611	0.289962	0.234657	0.185241
KIAA0513.L	0.400501	0.304533	0.258811	0.242566	0.181463	0.320006	0.268457	0.258623	0.210404	0.199296	0.360254	0.286495	0.258717	0.226485	0.190379
KIAA1432-LIKE.S	0.407396	0.355429	0.377326	0.327151	0.218978	0.385014	0.389843	0.278559	0.3263	0.25733	0.396205	0.372636	0.327943	0.326726	0.238154
KLF6.S	0.51948	0.47601	0.357793	0.228188	0.240669	0.389242	0.380536	0.304664	0.298678	0.227588	0.454361	0.428273	0.331228	0.263433	0.234129
KLHDC10.L	0.483127	0.340646	0.30791	0.324551	0.183063	0.362079	0.353338	0.296028	0.334306	0.302578	0.422603	0.346992	0.301969	0.329429	0.24282
KPNA3.S	0.352115	0.244391	0.223032	0.177199	0.196565	0.306315	0.291518	0.249374	0.213052	0.157364	0.329215	0.267954	0.236203	0.195126	0.176964
KPNA4.S	0.264772	0.240382	0.184664	0.119223	0.109083	0.296375	0.271547	0.165419	0.209319	0.145483	0.280574	0.255964	0.175042	0.164271	0.127283
KPNB1.L	0.327974	0.255187	0.217446	0.237498	0.188646	0.365991	0.306857	0.270686	0.278616	0.185334	0.346982	0.281022	0.244066	0.258057	0.18699
L3MBTL3.S	0.332245	0.427005	0.344482	0.194528	0.171864	0.317351	0.331952	0.211826	0.229426	0.192453	0.324798	0.379479	0.278154	0.211977	0.182159
LARP4.S	0.472537	0.428222	0.324484	0.340195	0.249402	0.383234	0.355979	0.333726	0.365677	0.278059	0.427886	0.3921	0.329105	0.352936	0.263731
LARS.L	0.483382	0.34676	0.229464	0.172683	0.112198	0.417445	0.299687	0.31057	0.2048	0.13344	0.450414	0.323223	0.270017	0.188741	0.122819
LETM2.L	0.316917	0.290844	0.183203	0.189009	0.0808461	0.264605	0.251985	0.192584	0.220646	0.165319	0.290761	0.271415	0.187893	0.204827	0.123082
LIG1.L	0.387595	0.303236	0.297453	0.199738	0.186922	0.43379	0.38511	0.443664	0.35335	0.257233	0.410692	0.344173	0.370559	0.276544	0.222077
LOC100036702.L	0.383217	0.509329	0.383249	0.211807	0.189214	0.522876	0.43513	0.413326	0.360145	0.286403	0.453046	0.472229	0.398287	0.285976	0.237808
LOC100127659.L	0.282125	0.300683	0.238569	0.2301	0.221726	0.459217	0.391527	0.296635	0.244659	0.172304	0.370671	0.346105	0.267602	0.237379	0.197015
LOC100135092.S	0.30991	0.377192	0.353106	0.165942	0.11146	0.296598	0.349142	0.386671	0.282882	0.249338	0.303254	0.363167	0.369889	0.224412	0.180399
LOC100135404.S	0.384969	0.299178	0.284256	0.22447	0.237498	0.451521	0.380208	0.346684	0.328417	0.20708	0.418245	0.339693	0.31547	0.276444	0.222289
LOC100144990.S	0.621195	0.420205	0.350879	0.359333	0.23698	0.396922	0.368576	0.330247	0.335499	0.345629	0.509059	0.39439	0.340563	0.347416	0.291305
LOC100216277.S	0.360547	0.458757	0.247807	0.191899	0.153149	0.450859	0.351049	0.31284	0.311881	0.257003	0.405703	0.404903	0.280324	0.25189	0.205076
LOC100485168.S	0.381981	0.269155	0.212994	0.227746	0.181182	0.348408	0.321572	0.234919	0.303696	0.201643	0.365195	0.295363	0.223956	0.265721	0.191413
LOC100485278.S	0.36453	0.246845	0.255044	0.184875	0.154273	0.383983	0.313863	0.303369	0.257759	0.192051	0.374257	0.280354	0.279207	0.221317	0.173162
LOC100485703.L	0.250152	0.298212	0.220346	0.0483391	0.135443	0.202997	0.270502	0.2369	0.215939	0.206067	0.226575	0.284357	0.228623	0.132139	0.170755
LOC100487316-LIKE.S	0.34677	0.318471	0.293091	0.213502	0.179449	0.384997	0.414881	0.39777	0.346342	0.211082	0.365884	0.366676	0.345431	0.279922	0.195265
LOC100487666.L	0.263697	0.305814	0.192631	0.185758	0.137768	0.401615	0.416133	0.332786	0.295398	0.184672	0.332656	0.360974	0.262709	0.240578	0.16122
LOC100489200-LIKE.S	0.456055	0.399303	0.369832	0.286283	0.241151	0.406785	0.366277	0.332238	0.353559	0.289733	0.43142	0.38279	0.351035	0.319921	0.265442
LOC100490423.S	0.342413	0.188176	0.194879	0.157618	0.168863	0.29118	0.269948	0.237737	0.23543	0.133108	0.316797	0.229062	0.216308	0.196524	0.150986
LOC100490733-LIKE.S	0.449802	0.382517	0.29882	0.213697	0.352814	0.41293	0.407229	0.352207	0.303922	0.241542	0.431366	0.394873	0.325514	0.258809	0.297178
LOC100491304.L	0.454564	0.430918	0.365234	0.381501	0.186978	0.398223	0.370777	0.256802	0.282277	0.281914	0.426394	0.400848	0.311018	0.331889	0.234446
LOC100491826-LIKE.L	0.404262	0.403586	0.244713	0.154952	0.150198	0.534581	0.419833	0.547346	0.430299	0.267935	0.469421	0.41171	0.396029	0.292625	0.209067
LOC100492173-LIKE.S	0.50749	0.406787	0.224049	0.246956	0.209133	0.417303	0.414482	0.400495	0.454166	0.358678	0.462396	0.410635	0.312272	0.350561	0.283906
LOC100493030.1	0.319686	0.35012	0.303215	0.228301	0.240532	0.37216	0.465234	0.343624	0.311786	0.247242	0.345923	0.407677	0.323419	0.270044	0.243887
LOC100494473.1	0.33622	0.357638	0.30544	0.257034	0.221761	0.486307	0.35637	0.447753	0.303529	0.239587	0.411263	0.357004	0.376597	0.280281	0.230674
LOC100494968.L	0.309374	0.256601	0.173013	0.225031	0.113647	0.363831	0.288823	0.289556	0.299836	0.232183	0.336603	0.272712	0.231284	0.262434	0.172915
LOC100495756-LIKE.S	0.423808	0.343312	0.354571	0.205689	0.141682	0.354318	0.385139	0.311522	0.297245	0.174354	0.389063	0.364226	0.333046	0.251467	0.158018
LOC100496637.S	0.306949	0.25878	0.227845	0.141957	0.16035	0.38897	0.348768	0.308611	0.25494	0.187914	0.34796	0.303774	0.268228	0.198449	0.174132
LOC100497448-LIKE.L	0.472255	0.434118	0.260484	0.203429	0.177188	0.577925	0.458801	0.378785	0.436969	0.265131	0.52509	0.44646	0.319635	0.320199	0.221159
LOC100497894-LIKE.L	0.447886	0.32083	0.305225	0.21027	0.175255	0.495289	0.354822	0.356019	0.261712	0.208321	0.471588	0.337826	0.330622	0.235991	0.191788
LOC100498538-LIKE.L	0.465718	0.359867	0.373674	0.296285	0.308788	0.369991	0.43818	0.227464	0.353068	0.19625	0.417854	0.399023	0.300569	0.324677	0.252519
LOC101730705.L	0.500657	0.495424	0.283855	0.265759	0.222829	0.528623	0.398206	0.425221	0.323463	0.253631	0.51464	0.446815	0.354538	0.294611	0.23823
LOC101730896.L	0.344692	0.320442	0.284303	0.21495	0.195688	0.425389	0.439564	0.377446	0.322569	0.272057	0.38504	0.380003	0.330875	0.268759	0.233873
LOC101732597.S	0.386889	0.342224	0.30059	0.239538	0.191705	0.378128	0.363725	0.295542	0.245094	0.230881	0.382508	0.352975	0.298066	0.242316	0.211293
LOC101733356-LIKE.L	0.302803	0.21468	0.237094	0.191694	0.113245	0.322295	0.317652	0.257139	0.244279	0.19722	0.312549	0.266166	0.247116	0.217986	0.155233
LOC101733385.S	0.290072	0.288506	0.198251	0.170059	0.167109	0.384852	0.29718	0.287228	0.225198	0.175206	0.337462	0.292843	0.24274	0.197628	0.171158
LOC101734415.L	0.166117	0.435524	0.297377	0.170687	0.171666	0.360433	0.315787	0.194804	0.230243	0.161768	0.263275	0.375656	0.246091	0.200465	0.166717
LOC101734987.L	0.444987	0.278822	0.273623	0.214541	0.203534	0.324123	0.402812	0.263051	0.26707	0.243941	0.384555	0.340817	0.268337	0.240806	0.223738
LOC101734987.S	0.417868	0.401466	0.348327	0.233128	0.192494	0.430427	0.335022	0.336592	0.405726	0.25955	0.424147	0.368244	0.342459	0.319427	0.226022
LOC733470.S	0.364219	0.330291	0.270964	0.173595	0.134339	0.408652	0.322265	0.346238	0.248405	0.159405	0.386435	0.326278	0.308601	0.211	0.146872
LOC733735.L	0.50456	0.484322	0.36225	0.265514	0.230152	0.36158	0.401186	0.310256	0.312983	0.31035	0.43307	0.442754	0.336253	0.289249	0.270251
LOC734032-LIKE.S	0.469149	0.53132	0.250966	0.23756	0.251374	0.505357	0.426447	0.533976	0.504829	0.302583	0.487253	0.478884	0.392471	0.371195	0.276978
LSM12.L	0.396235	0.242645	0.217108	0.222549	0.197321	0.316931	0.328352	0.295383	0.217116	0.196024	0.356583	0.285498	0.256245	0.219832	0.196672
LSM14B.L	0.445796	0.283129	0.232511	0.164924	0.200055	0.355961	0.362461	0.36905	0.340172	0.21472	0.400878	0.322795	0.30078	0.252548	0.207388
MAN1A2.S	0.353208	0.250532	0.127935	0.192467	0.0805312	0.190146	0.189695	0.117728	0.128214	0.113956	0.271677	0.220114	0.122832	0.160341	0.0972437
MAST2.S	0.379496	0.228724	0.249503	0.296002	0.153536	0.275859	0.303346	0.210438	0.185419	0.170903	0.327678	0.266035	0.229971	0.240711	0.16222
MASTL.L	0.425688	0.435829	0.286679	0.0993739	0.208557	0.315165	0.357572	0.342039	0.35421	0.282226	0.370427	0.396701	0.314359	0.226792	0.245392
MCEE.S	0.519609	0.293572	0.123082	0.260945	0.156246	0.389412	0.401464	0.403453	0.244437	0.269635	0.45451	0.347518	0.263267	0.252691	0.21294
MCL1.L	0.394803	0.23552	0.249143	0.213261	0.207716	0.270438	0.270566	0.183666	0.158859	0.14997	0.33262	0.253043	0.216404	0.18606	0.178843
MCM3.L	0.532121	0.508416	0.416609	0.297286	0.228564	0.550302	0.494538	0.507775	0.484893	0.394597	0.541212	0.501477	0.462192	0.39109	0.311581
MGC75700.L	0.508277	0.616728	0.448014	0.386368	0.292533	0.378033	0.352077	0.337094	0.240828	0.150349	0.443155	0.484402	0.392554	0.313598	0.221441
MGC89853.L	0.345422	0.328525	0.250612	0.274945	0.153232	0.40327	0.381559	0.373132	0.333818	0.219278	0.374346	0.355042	0.311872	0.304381	0.186255
MGEA5.L	0.3882	0.470089	0.347813	0.336507	0.229576	0.401994	0.342482	0.321705	0.314471	0.22789	0.395097	0.406286	0.334759	0.325489	0.228733
MGST3.L	0.361873	0.467598	0.142933	0.121909	0.137631	0.475154	0.33603	0.415504	0.335933	0.209326	0.418514	0.401814	0.279219	0.228921	0.173479
MIEF1.L	0.503393	0.286597	0.304963	0.243206	0.281225	0.350978	0.384255	0.276145	0.261172	0.214826	0.427185	0.335426	0.290554	0.252189	0.248025
MLLT10-LIKE.L	0.54751	0.351904	0.325638	0.277603	0.216778	0.472087	0.407967	0.407008	0.379273	0.329185	0.509799	0.379936	0.366323	0.328438	0.272981
MOB1A.S	0.449604	0.337164	0.230727	0.30531	0.193835	0.384381	0.368734	0.315929	0.322092	0.288999	0.416993	0.352949	0.273328	0.313701	0.241417
MORF4L1.S	0.384515	0.310262	0.232356	0.302172	0.241865	0.315128	0.314941	0.278202	0.232576	0.133338	0.349822	0.312602	0.255279	0.267374	0.187601
MRPL35.L	0.433321	0.532822	0.2919	0.238514	0.382412	0.434263	0.433991	0.483852	0.380363	0.305379	0.433792	0.483406	0.387876	0.309439	0.343895
MRPS12.S	0.525182	0.403844	0.210381	0.238755	0.123167	0.387057	0.318614	0.262801	0.323488	0.185756	0.45612	0.361229	0.236591	0.281121	0.154461
MRPS34.S	0.397551	0.316306	0.23667	0.213568	0.144417	0.359608	0.327024	0.324497	0.327026	0.179313	0.37858	0.321665	0.280584	0.270297	0.161865
MTERFD2.L	0.317125	0.241373	0.245018	0.170669	0.089308	0.278535	0.307184	0.195609	0.199085	0.156403	0.29783	0.274279	0.220314	0.184877	0.122855
MTFR1.S	0.222471	0.325361	0.196028	0.123177	0.0607814	0.320894	0.313785	0.233638	0.234498	0.148008	0.271682	0.319573	0.214833	0.178837	0.104395
MTIF3.L	0.321898	0.263602	0.294345	0.273631	0.156183	0.361627	0.340002	0.26909	0.268817	0.180141	0.341763	0.301802	0.281718	0.271224	0.168162
NAA35.S	0.455054	0.382952	0.394574	0.276135	0.295978	0.467209	0.451047	0.493439	0.342996	0.255577	0.461132	0.416999	0.444007	0.309566	0.275778
NACA.2.S	0.392518	0.322991	0.254157	0.124065	0.219447	0.421758	0.46069	0.271909	0.330661	0.15092	0.407138	0.39184	0.263033	0.227363	0.185183
NAF1.L	0.384604	0.348461	0.266178	0.226424	0.183059	0.40225	0.353811	0.436147	0.327914	0.287506	0.393427	0.351136	0.351163	0.277169	0.235282
NANOS1.L	0.616819	0.676244	0.381602	0.319523	0.395001	0.60353	0.535802	0.649021	0.680173	0.492494	0.610174	0.606023	0.515312	0.499848	0.443747
NAPG.L	0.314008	0.460962	0.394634	0.200664	0.136294	0.436933	0.291644	0.320972	0.25694	0.24218	0.375471	0.376303	0.357803	0.228802	0.189237
NAT10.L	0.369902	0.367847	0.24644	0.197317	0.188791	0.391326	0.350161	0.362084	0.270839	0.210973	0.380614	0.359004	0.304262	0.234078	0.199882
NBN-LIKE.L	0.303909	0.272942	0.229124	0.189196	0.142044	0.338465	0.314687	0.280113	0.219783	0.179371	0.321187	0.293815	0.254618	0.204489	0.160708
NCAPH2.L	0.420569	0.352179	0.331118	0.153005	0.0688475	0.290872	0.27507	0.240993	0.209369	0.151739	0.35572	0.313625	0.286055	0.181187	0.110293
NDE1.L	0.325682	0.256128	0.245145	0.141117	0.147175	0.261738	0.243191	0.186748	0.196104	0.13985	0.29371	0.249659	0.215947	0.168611	0.143512
NDUFA12.S	0.468344	0.434761	0.282834	0.273225	0.224408	0.593666	0.454814	0.540873	0.511535	0.309282	0.531005	0.444788	0.411854	0.39238	0.266845
NDUFA3.S	0.371802	0.545295	0.458709	0.177657	0.138554	0.424077	0.476762	0.454057	0.414891	0.441724	0.39794	0.511028	0.456383	0.296274	0.290139
NDUFA5.L	0.484527	0.206712	0.296057	0.294596	0.234351	0.476486	0.423417	0.267737	0.266969	0.13236	0.480507	0.315065	0.281897	0.280783	0.183355
NDUFA7-LIKE.L	0.364603	0.354332	0.0975679	0.0558241	0.223032	0.545994	0.361041	0.317908	0.29754	0.257186	0.455298	0.357687	0.207738	0.176682	0.240109
NDUFAF2-LIKE.L	0.402558	0.300504	0.479179	0.229523	0.155301	0.445864	0.435798	0.356738	0.404148	0.264443	0.424211	0.368151	0.417959	0.316836	0.209872
NDUFB4.S	0.344527	0.379613	0.291571	0.279411	0.22891	0.48191	0.409585	0.428775	0.431215	0.290905	0.413219	0.394599	0.360173	0.355313	0.259908
NDUFB5.L	0.415623	0.366113	0.472754	0.23154	0.232551	0.438168	0.41285	0.339086	0.413723	0.294462	0.426896	0.389482	0.40592	0.322631	0.263506
NEURL1.S	0.508386	0.432068	0.31833	0.250206	0.26904	0.347259	0.311249	0.240276	0.203428	0.250818	0.427822	0.371658	0.279303	0.226817	0.259929
NFYA.S	0.477443	0.575684	0.447304	0.346199	0.236023	0.354846	0.400433	0.428093	0.352801	0.333271	0.416144	0.488058	0.437699	0.3495	0.284647
NIPAL3.S	0.369575	0.146115	0.122741	0.0778001	0.0890987	0.348445	0.296354	0.325284	0.193294	0.170238	0.35901	0.221235	0.224013	0.135547	0.129669
NKRF.L	0.326123	0.348277	0.392389	0.247476	0.181607	0.355553	0.349507	0.252895	0.303811	0.213648	0.340838	0.348892	0.322642	0.275643	0.197627
NKRF.S	0.270769	0.442456	0.305239	0.150006	0.126059	0.230174	0.306219	0.255439	0.169311	0.234645	0.250472	0.374337	0.280339	0.159659	0.180352
NMT1.L	0.393932	0.295214	0.209979	0.162409	0.194629	0.312949	0.263083	0.208707	0.228319	0.202723	0.353441	0.279148	0.209343	0.195364	0.198676
NMT1.S	0.411	0.364424	0.284095	0.25338	0.185008	0.379561	0.30207	0.312957	0.232347	0.220824	0.395281	0.333247	0.298526	0.242863	0.202916
NPEPPS.S	0.463477	0.304441	0.258629	0.228267	0.151246	0.331704	0.346155	0.247036	0.293448	0.204289	0.39759	0.325298	0.252832	0.260857	0.177767
NR6A1.L	0.528876	0.541119	0.255731	0.414384	0.38622	0.393111	0.450591	0.442573	0.173669	0.336101	0.460994	0.495855	0.349152	0.294027	0.361161
NRF1-LIKE.L	0.419817	0.345847	0.214581	0.309763	0.190708	0.316309	0.305102	0.285231	0.237411	0.217766	0.368063	0.325475	0.249906	0.273587	0.204237
NSA2.L	0.360552	0.272736	0.215304	0.175549	0.152582	0.446885	0.315218	0.319149	0.198599	0.163459	0.403718	0.293977	0.267227	0.187074	0.158021
NUDC.S	0.400602	0.402333	0.343968	0.245389	0.137956	0.443058	0.41917	0.45327	0.374659	0.247487	0.42183	0.410751	0.398619	0.310024	0.192722
NUDCD3.L	0.338881	0.366566	0.252754	0.142553	0.183567	0.423278	0.319424	0.449794	0.246662	0.184566	0.38108	0.342995	0.351274	0.194607	0.184067
ORMDL1.S	0.443124	0.491999	0.398534	0.308976	0.305408	0.441649	0.439182	0.363204	0.34048	0.247878	0.442387	0.465591	0.380869	0.324728	0.276643
OXA1L.L	0.276919	0.335524	0.204704	0.13324	0.22291	0.303755	0.343511	0.222331	0.137158	0.190599	0.290337	0.339518	0.213517	0.135199	0.206754
P4HB.S	0.396229	0.532126	0.409845	0.148276	0.285121	0.251365	0.285533	0.224436	0.235131	0.221691	0.323797	0.40883	0.317141	0.191704	0.253406
PA2G4.L	0.513122	0.508067	0.339024	0.222524	0.15154	0.530845	0.343406	0.455261	0.365186	0.229153	0.521983	0.425736	0.397143	0.293855	0.190347
PA2G4.S	0.383437	0.361862	0.332803	0.215865	0.179886	0.426414	0.365021	0.348574	0.327971	0.208891	0.404925	0.363441	0.340688	0.271918	0.194388
PAICS.1.L	0.41227	0.409037	0.221591	0.175893	0.198319	0.341599	0.30806	0.274428	0.27893	0.173238	0.376935	0.358549	0.24801	0.227412	0.185778
PAIP2B.S	0.456732	0.408485	0.260673	0.24625	0.245323	0.418199	0.355159	0.322243	0.30682	0.229778	0.437466	0.381822	0.291458	0.276535	0.23755
PALB2.S	0.285355	0.235233	0.160733	0.107733	0.128137	0.328013	0.282629	0.196153	0.168764	0.142278	0.306684	0.258931	0.178443	0.138249	0.135207
PANK4.S	0.425059	0.344866	0.293777	0.175549	0.197524	0.275728	0.277605	0.308781	0.195096	0.169923	0.350393	0.311236	0.301279	0.185322	0.183723
PAPOLG.L	0.320685	0.387557	0.257519	0.213705	0.186245	0.317739	0.359799	0.305148	0.264604	0.18204	0.319212	0.373678	0.281334	0.239154	0.184142
PARD3.S	0.369978	0.350562	0.291889	0.273678	0.178291	0.376916	0.35917	0.299202	0.313733	0.245603	0.373447	0.354866	0.295546	0.293706	0.211947
PDE7A-LIKE.L	0.500131	0.455013	0.361938	0.240595	0.40428	0.364482	0.358282	0.321375	0.284082	0.259871	0.432306	0.406647	0.341656	0.262339	0.332076
PDE7A-LIKE.S	0.481403	0.398683	0.30859	0.288262	0.225411	0.383697	0.342804	0.296624	0.361012	0.261678	0.43255	0.370743	0.302607	0.324637	0.243545
PDIA3.S	0.481295	0.46159	0.233696	0.304708	0.267958	0.258455	0.303796	0.258063	0.213016	0.138901	0.369875	0.382693	0.24588	0.258862	0.203429
PELI1.S	0.417697	0.347018	0.31294	0.279623	0.272002	0.361018	0.378141	0.389966	0.259925	0.201192	0.389357	0.362579	0.351453	0.269774	0.236597
PFDN2.S	0.37526	0.359091	0.288832	0.144743	0.236145	0.405705	0.334041	0.368547	0.293688	0.212375	0.390483	0.346566	0.328689	0.219215	0.22426
PFDN4.L	0.428688	0.542416	0.276434	0.136888	0.268933	0.510308	0.322607	0.496071	0.46342	0.454669	0.469498	0.432512	0.386253	0.300154	0.361801
PHR.L	0.603995	0.480071	0.444181	0.503064	0.301313	0.536904	0.38798	0.425829	0.339457	0.260033	0.570449	0.434025	0.435005	0.421261	0.280673
PIAS4.S	0.442797	0.391636	0.290718	0.24196	0.25189	0.404331	0.332514	0.340301	0.37418	0.278055	0.423564	0.362075	0.315509	0.30807	0.264972
PIP4K2C.L	0.417959	0.30371	0.288298	0.235937	0.226195	0.333691	0.330984	0.293553	0.235643	0.191433	0.375825	0.317347	0.290925	0.23579	0.208814
PIP4K2C.S	0.475611	0.276705	0.229934	0.30721	0.266203	0.315518	0.326979	0.366003	0.263027	0.185323	0.395564	0.301842	0.297969	0.285119	0.225763
PJA2-LIKE.L	0.254379	0.31038	0.210213	0.128149	0.160102	0.281119	0.259796	0.196813	0.120058	0.171346	0.267749	0.285088	0.203513	0.124103	0.165724
PMEPA1.L	0.478416	0.39474	0.406406	0.337361	0.314464	0.444117	0.367274	0.338499	0.330821	0.282242	0.461267	0.381007	0.372453	0.334091	0.298353
PMEPA1.S	0.465517	0.41345	0.464093	0.368378	0.251645	0.373506	0.419062	0.280063	0.345122	0.256906	0.419511	0.416256	0.372078	0.35675	0.254275
POF1B.S	0.35315	0.195264	0.250654	0.155393	0.101907	0.254597	0.284011	0.291333	0.157744	0.123624	0.303873	0.239637	0.270994	0.156569	0.112765
POLR1A.L	0.529593	0.496031	0.308554	0.291338	0.223573	0.527468	0.470586	0.387958	0.424993	0.347954	0.528531	0.483309	0.348256	0.358166	0.285764
POLR1D.1.S	0.331204	0.381205	0.253694	0.210779	0.0870473	0.389321	0.411449	0.313331	0.26918	0.18767	0.360262	0.396327	0.283512	0.23998	0.137358
POLR1E.L	0.409377	0.398011	0.368378	0.158824	0.225117	0.384913	0.372953	0.361191	0.302564	0.204782	0.397145	0.385482	0.364784	0.230694	0.214949
POT1.L	0.442213	0.376398	0.339037	0.339037	0.166817	0.344115	0.34098	0.274924	0.296276	0.261117	0.393164	0.358689	0.306981	0.317656	0.213967
PPDPF.L	0.415675	0.261097	0.266838	0.171628	0.163922	0.332786	0.305068	0.196201	0.209994	0.187958	0.374231	0.283083	0.23152	0.190811	0.17594
PPDPF.S	0.400566	0.342924	0.204306	0.181104	0.184074	0.300876	0.295644	0.241252	0.27866	0.212402	0.350721	0.319284	0.222779	0.229882	0.198238
PPIB.L	0.67633	0.431494	0.607432	0.379217	0.0986897	0.302665	0.331749	0.264435	0.309396	0.201492	0.489497	0.381622	0.435934	0.344306	0.150091
PPP1R2.L	0.490545	0.448927	0.475097	0.20517	0.13993	0.592891	0.595346	0.588329	0.651892	0.590994	0.541718	0.522136	0.531713	0.428531	0.365462
PPP1R2.S	0.434084	0.399725	0.264976	0.11354	0.200459	0.43138	0.396979	0.417057	0.347713	0.207532	0.432732	0.398352	0.341017	0.230627	0.203996
PPP1R3B.S	0.514637	0.329912	0.322627	0.263782	0.138581	0.46904	0.402873	0.372496	0.438071	0.253862	0.491839	0.366392	0.347562	0.350927	0.196222
PPP2R3C.L	0.347224	0.235799	0.127742	0.180142	0.171544	0.34385	0.379677	0.282837	0.203686	0.211939	0.345537	0.307738	0.205289	0.191914	0.191742
PPP3CC.L	0.476892	0.481768	0.396516	0.336982	0.269737	0.402805	0.418696	0.373258	0.344417	0.302469	0.439849	0.450232	0.384887	0.340699	0.286103
PRDX3.L	0.283695	0.361879	0.38316	0.140226	0.203604	0.365771	0.345711	0.299614	0.23373	0.17134	0.324733	0.353795	0.341387	0.186978	0.187472
PRR14.S	0.364468	0.27065	0.150056	0.223609	0.177252	0.343537	0.330365	0.296589	0.186057	0.202054	0.354002	0.300508	0.223322	0.204833	0.189653
PSMC1.L	0.284856	0.260347	0.184704	0.150231	0.118052	0.359082	0.314058	0.301459	0.202852	0.164666	0.321969	0.287202	0.243081	0.176541	0.141359
PSMC1.S	0.364549	0.243106	0.178694	0.13	0.190144	0.352326	0.329883	0.280293	0.198839	0.180274	0.358437	0.286495	0.229493	0.164419	0.185209
PSMC3.L	0.369638	0.41282	0.281888	0.275145	0.152541	0.486409	0.406765	0.412579	0.320021	0.246651	0.428024	0.409792	0.347234	0.297583	0.199596
PSMD1.L	0.295956	0.403187	0.278784	0.198937	0.215355	0.366137	0.350545	0.395381	0.292078	0.212097	0.331046	0.376866	0.337083	0.245507	0.213726
PSMD2.L	0.42186	0.495947	0.340304	0.363206	0.211106	0.467256	0.408619	0.402665	0.363504	0.203478	0.444558	0.452283	0.371485	0.363355	0.207292
PSMD7.L	0.518247	0.472024	0.376735	0.225659	0.171187	0.463125	0.413861	0.500637	0.372412	0.191852	0.490686	0.442942	0.438686	0.299035	0.181519
PSME1.L	0.443094	0.443898	0.321261	0.271642	0.128281	0.571193	0.428965	0.415732	0.39402	0.239617	0.507144	0.436432	0.368496	0.332831	0.183949
PSME1.S	0.41027	0.308154	0.304391	0.216135	0.109444	0.518999	0.379195	0.408021	0.192549	0.174317	0.464635	0.343674	0.356206	0.204342	0.141881
PTP4A3.S	0.426428	0.257949	0.240419	0.226031	0.183042	0.254122	0.359928	0.333978	0.173305	0.144401	0.340275	0.308939	0.287199	0.199668	0.163721
PTTG1IP.1.L	0.354596	0.50406	0.351397	0.209752	0.172901	0.246053	0.386841	0.252011	0.340417	0.152685	0.300324	0.44545	0.301704	0.275085	0.162793
PWP1-LIKE.S	0.456465	0.206718	0.221252	0.198988	0.151008	0.299428	0.261939	0.238915	0.168852	0.149736	0.377946	0.234328	0.230083	0.18392	0.150372
RAB11B.1.L	0.402384	0.315267	0.328579	0.168265	0.180307	0.292437	0.292783	0.194501	0.241089	0.18904	0.34741	0.304025	0.26154	0.204677	0.184674
RAB33B.S	0.362033	0.306704	0.280682	0.15227	0.156725	0.293595	0.333062	0.193812	0.255145	0.194022	0.327814	0.319883	0.237247	0.203708	0.175374
RAB3GAP1.L	0.395883	0.34832	0.272278	0.186283	0.15338	0.26055	0.263988	0.239952	0.201836	0.110884	0.328216	0.306154	0.256115	0.19406	0.132132
RABGGTB.L	0.2636	0.201244	0.26833	0.173865	0.156994	0.236251	0.45838	0.180309	0.231775	0.14749	0.249925	0.329812	0.22432	0.20282	0.152242
RANBP3.L	0.373067	0.281505	0.2703	0.232744	0.157967	0.333933	0.321303	0.254723	0.264128	0.245152	0.3535	0.301404	0.262511	0.248436	0.20156
RBBP7.S	0.497442	0.382135	0.304008	0.235857	0.213648	0.371352	0.381684	0.303372	0.325329	0.217817	0.434397	0.381909	0.30369	0.280593	0.215732
RBM22.S	0.511876	0.335607	0.250442	0.0981973	0.115207	0.288353	0.357069	0.300956	0.235009	0.380339	0.400115	0.346338	0.275699	0.166603	0.247773
RBM34.L	0.329677	0.302852	0.273732	0.160561	0.170741	0.411027	0.325019	0.3526	0.258964	0.236363	0.370352	0.313936	0.313166	0.209762	0.203552
RBM39.S	0.335811	0.338842	0.291193	0.218049	0.16318	0.352468	0.25744	0.279789	0.288162	0.15071	0.34414	0.298141	0.285491	0.253105	0.156945
RBM42.L	0.325743	0.257628	0.237458	0.236012	0.127722	0.322597	0.334126	0.360742	0.173656	0.213253	0.32417	0.295877	0.2991	0.204834	0.170488
RBM6.L	0.454943	0.589369	0.312633	0.285232	0.355157	0.315095	0.291955	0.244653	0.202979	0.207849	0.385019	0.440662	0.278643	0.244105	0.281503
RBPMS2.S	0.359511	0.277704	0.259537	0.256272	0.250056	0.360375	0.34975	0.24819	0.277625	0.150927	0.359943	0.313727	0.253863	0.266948	0.200492
RHOC.L	0.49859	0.474458	0.333937	0.323246	0.273066	0.365947	0.330405	0.270627	0.285929	0.276151	0.432268	0.402431	0.302282	0.304588	0.274608
RIMKLB-LIKE.S	0.44386	0.355917	0.295004	0.229255	0.220508	0.363809	0.305239	0.247042	0.26311	0.228286	0.403834	0.330578	0.271023	0.246183	0.224397
RND3.L	0.289628	0.333241	0.297657	0.154779	0.120599	0.301716	0.319026	0.305107	0.297965	0.211697	0.295672	0.326133	0.301382	0.226372	0.166148
RNF10.L	0.326642	0.307511	0.227616	0.215698	0.168537	0.317614	0.333176	0.318289	0.223971	0.175416	0.322128	0.320344	0.272952	0.219835	0.171976
RNF11.L	0.376066	0.355798	0.185429	0.179405	0.175728	0.283145	0.31612	0.207815	0.251779	0.19183	0.329606	0.335959	0.196622	0.215592	0.183779
RNF216.L	0.359253	0.247219	0.236875	0.120324	0.157401	0.263233	0.30679	0.206554	0.157299	0.156618	0.311243	0.277004	0.221715	0.138811	0.157009
RNF26.L	0.369489	0.300182	0.242686	0.157956	0.11728	0.326767	0.30215	0.246822	0.232569	0.256778	0.348128	0.301166	0.244754	0.195262	0.187029
RP9.L	0.29991	0.168741	0.18607	0.119044	0.146997	0.37722	0.330263	0.260462	0.189809	0.12742	0.338565	0.249502	0.223266	0.154426	0.137208
RPAP2.L	0.365143	0.238598	0.192424	0.199911	0.163952	0.23772	0.266277	0.256346	0.129085	0.133902	0.301431	0.252438	0.224385	0.164498	0.148927
RPL10A.S	0.560967	0.421224	0.442726	0.377326	0.299148	0.354247	0.40566	0.289474	0.348635	0.238476	0.457607	0.413442	0.3661	0.362981	0.268812
RPL14.L	0.442489	0.470487	0.340775	0.146252	0.151772	0.499003	0.432784	0.460454	0.33441	0.208465	0.470746	0.451635	0.400614	0.240331	0.180118
RPL14.S	0.383473	0.433613	0.307489	0.219027	0.130494	0.482395	0.487032	0.486003	0.379409	0.218416	0.432934	0.460322	0.396746	0.299218	0.174455
RPL17.L	0.301904	0.29427	0.189959	0.151871	0.210676	0.361628	0.345533	0.244434	0.180302	0.124536	0.331766	0.319901	0.217197	0.166087	0.167606
RPL17.S	0.348211	0.281761	0.18735	0.211999	0.143283	0.399278	0.332191	0.242235	0.194951	0.141633	0.373745	0.306976	0.214793	0.203475	0.142458
RPL19.L	0.317776	0.279546	0.204096	0.175694	0.157283	0.374841	0.301532	0.283428	0.255665	0.159986	0.346309	0.290539	0.243762	0.21568	0.158635
RPL19.S	0.430225	0.353223	0.297828	0.237527	0.170496	0.47669	0.358805	0.341771	0.276355	0.157743	0.453457	0.356014	0.3198	0.256941	0.164119
RPL23.S	0.344326	0.266502	0.181615	0.200184	0.192901	0.328224	0.288712	0.249829	0.190035	0.125528	0.336275	0.277607	0.215722	0.19511	0.159214
RPL24.L	0.412986	0.30726	0.25653	0.196603	0.159186	0.37166	0.333197	0.278856	0.200858	0.189072	0.392323	0.320229	0.267693	0.198731	0.174129
RPL24.S	0.32869	0.268274	0.222748	0.278748	0.22404	0.384116	0.324979	0.291176	0.247463	0.160154	0.356403	0.296627	0.256962	0.263106	0.192097
RPL29.L	0.287426	0.227179	0.183642	0.216803	0.140253	0.387554	0.367279	0.303307	0.233397	0.169139	0.33749	0.297229	0.243475	0.2251	0.154696
RPL35.L	0.395702	0.294405	0.198992	0.274823	0.30326	0.445391	0.352294	0.353384	0.307102	0.183122	0.420546	0.323349	0.276188	0.290962	0.243191
RPL35.S	0.435072	0.29752	0.225899	0.235184	0.197123	0.36848	0.339081	0.299508	0.220654	0.169565	0.401776	0.3183	0.262703	0.227919	0.183344
RPL36.L	0.491294	0.301926	0.37582	0.314304	0.267687	0.496717	0.417589	0.370745	0.307434	0.231574	0.494005	0.359758	0.373282	0.310869	0.249631
RPL37A.L	0.431882	0.365466	0.24132	0.199979	0.246649	0.324254	0.291957	0.208799	0.22615	0.142978	0.378068	0.328712	0.22506	0.213064	0.194814
RPL38.L	0.430486	0.362314	0.348623	0.32335	0.127888	0.464933	0.446239	0.382718	0.298021	0.199492	0.447709	0.404276	0.365671	0.310686	0.16369
RPL38.S	0.323523	0.295724	0.283918	0.240054	0.173733	0.37983	0.372727	0.248778	0.222329	0.192117	0.351676	0.334225	0.266348	0.231192	0.182925
RPL5.L	0.462191	0.496644	0.313367	0.289258	0.192334	0.385305	0.395085	0.352053	0.333158	0.197048	0.423748	0.445865	0.33271	0.311208	0.194691
RPL5.S	0.50271	0.446461	0.361506	0.262666	0.209254	0.430755	0.397949	0.392434	0.289218	0.21867	0.466732	0.422205	0.37697	0.275942	0.213962
RPLP1.L	0.398097	0.479629	0.338754	0.267238	0.253929	0.305511	0.341372	0.257335	0.281232	0.173067	0.351804	0.410501	0.298044	0.274235	0.213498
RPS10.L	0.490757	0.428412	0.322976	0.311793	0.294045	0.485416	0.418997	0.432778	0.301039	0.240679	0.488086	0.423705	0.377877	0.306416	0.267362
RPS13.L	0.432203	0.368853	0.257935	0.251372	0.156792	0.392077	0.321741	0.281331	0.247972	0.135954	0.41214	0.345297	0.269633	0.249672	0.146373
RPS13.S	0.390653	0.399077	0.224273	0.24915	0.222284	0.34682	0.344532	0.304889	0.294289	0.196256	0.368736	0.371804	0.264581	0.271719	0.20927
RPS19BP1.L	0.355477	0.360054	0.333404	0.150327	0.147671	0.384022	0.397951	0.426644	0.332725	0.198358	0.36975	0.379003	0.380024	0.241526	0.173015
RPS3A.S	0.504075	0.447291	0.25068	0.212315	0.212472	0.388907	0.415224	0.385154	0.350058	0.195925	0.446491	0.431257	0.317917	0.281187	0.204198
RPS8.L	0.330466	0.302257	0.226345	0.179277	0.209217	0.385152	0.341009	0.26467	0.241175	0.160692	0.357809	0.321633	0.245508	0.210226	0.184955
RPS8.S	0.331843	0.315914	0.23149	0.219746	0.1848	0.433554	0.355703	0.319914	0.255003	0.209257	0.382698	0.335808	0.275702	0.237375	0.197028
RRS1.L	0.318947	0.284547	0.227331	0.256098	0.0963814	0.323393	0.309308	0.298318	0.249885	0.174725	0.32117	0.296927	0.262825	0.252992	0.135553
RRS1.S	0.469603	0.421456	0.238595	0.3044	0.196833	0.379841	0.327202	0.439076	0.402733	0.326401	0.424722	0.374329	0.338835	0.353567	0.261617
RSPRY1.L	0.241051	0.327378	0.238842	0.12124	0.154748	0.277983	0.310115	0.290082	0.194362	0.230215	0.259517	0.318747	0.264462	0.157801	0.192481
RTN4.L	0.418955	0.233407	0.217382	0.0716271	0.145782	0.193513	0.248709	0.213277	0.174143	0.0965554	0.306234	0.241058	0.215329	0.122885	0.121169
RUVBL1.L	0.419581	0.291985	0.323251	0.19756	0.190374	0.371523	0.283836	0.290187	0.203694	0.117787	0.395552	0.28791	0.306719	0.200627	0.15408
SAMD4A.L	0.419407	0.279192	0.259283	0.2749	0.23868	0.355325	0.310503	0.277751	0.27363	0.205127	0.387366	0.294848	0.268517	0.274265	0.221904
SAMD4A.S	0.445419	0.312865	0.291111	0.342888	0.224364	0.320012	0.315091	0.291618	0.254859	0.197636	0.382715	0.313978	0.291365	0.298873	0.211
SARS.L	0.363982	0.368584	0.257682	0.310372	0.175655	0.345874	0.420953	0.34128	0.219814	0.24672	0.354928	0.394769	0.299481	0.265093	0.211187
SATB1.L	0.490731	0.307256	0.273763	0.199826	0.266724	0.401297	0.320177	0.272867	0.267079	0.18344	0.446014	0.313717	0.273315	0.233453	0.225082
SDF2.S	0.443423	0.351822	0.242324	0.261919	0.126135	0.331752	0.320454	0.198719	0.233687	0.155164	0.387588	0.336138	0.220521	0.247803	0.14065
SDR16C5.L	0.453099	0.244025	0.24449	0.14828	0.135726	0.391096	0.344796	0.243638	0.214662	0.230371	0.422098	0.29441	0.244064	0.181471	0.183049
SEMA3A.L	0.319099	0.363879	0.256795	0.210074	0.129352	0.378088	0.348479	0.403281	0.190819	0.250614	0.348594	0.356179	0.330038	0.200446	0.189983
SENP5.L	0.28707	0.173126	0.188569	0.176228	0.100947	0.323688	0.298447	0.216557	0.174359	0.196385	0.305379	0.235786	0.202563	0.175294	0.148666
SENP6.L	0.315089	0.326804	0.233421	0.185508	0.192566	0.307232	0.35085	0.272732	0.214938	0.181025	0.31116	0.338827	0.253076	0.200223	0.186795
SETD5-LIKE.S	0.405204	0.342642	0.293582	0.232872	0.226385	0.395039	0.37003	0.251935	0.300476	0.211471	0.400122	0.356336	0.272759	0.266674	0.218928
SFXN1.L	0.410696	0.305063	0.265004	0.211926	0.26779	0.384044	0.329702	0.246859	0.269419	0.155825	0.39737	0.317383	0.255932	0.240672	0.211807
SGTA.S	0.254063	0.513081	0.313157	0.234079	0.247407	0.362598	0.362732	0.285528	0.205677	0.278145	0.30833	0.437907	0.299343	0.219878	0.262776
SH3GL1.L	0.400432	0.28394	0.341243	0.132428	0.117432	0.323286	0.338745	0.225694	0.210163	0.134153	0.361859	0.311343	0.283469	0.171296	0.125793
SH3GLB1.S	0.34315	0.40524	0.335844	0.211197	0.116199	0.349595	0.384463	0.349401	0.237897	0.170862	0.346372	0.394852	0.342622	0.224547	0.143531
SIK3-LIKE.L	0.41806	0.283061	0.267065	0.233907	0.152513	0.291475	0.308958	0.232678	0.259824	0.194273	0.354767	0.29601	0.249871	0.246865	0.173393
SLC25A3.L	0.470249	0.381166	0.335739	0.222281	0.197501	0.368438	0.316195	0.304103	0.269243	0.16249	0.419344	0.34868	0.319921	0.245762	0.179995
SLC25A3.S	0.475906	0.470006	0.276399	0.216272	0.427884	0.327523	0.267398	0.210831	0.242762	0.191954	0.401715	0.368702	0.243615	0.229517	0.309919
SLC7A7.L	0.336934	0.348741	0.28299	0.189396	0.374883	0.240409	0.286327	0.196495	0.112264	0.096708	0.288671	0.317534	0.239742	0.15083	0.235795
SLC8B1.L	0.356183	0.247413	0.227193	0.190147	0.151882	0.29938	0.294047	0.260764	0.25216	0.169854	0.327781	0.27073	0.243978	0.221154	0.160868
SMAD7.L	0.472703	0.451251	0.253958	0.236407	0.149618	0.389313	0.386431	0.240808	0.28941	0.216654	0.431008	0.418841	0.247383	0.262908	0.183136
SMEK2.S	0.398047	0.287361	0.174456	0.212041	0.189121	0.265868	0.269241	0.206894	0.192502	0.141657	0.331957	0.278301	0.190675	0.202271	0.165389
SMN2.S	0.389366	0.358838	0.301438	0.213118	0.19537	0.387092	0.452398	0.456289	0.362979	0.280502	0.388229	0.405618	0.378864	0.288048	0.237936
SNX1.S	0.413985	0.247746	0.168684	0.217205	0.1116	0.327586	0.321095	0.289373	0.232191	0.234164	0.370786	0.284421	0.229029	0.224698	0.172882
SNX31.S	0.398809	0.39045	0.343375	0.178185	0.0784239	0.399117	0.317	0.383206	0.368239	0.307072	0.398963	0.353725	0.36329	0.273212	0.192748
SOS1.L	0.347295	0.254288	0.201626	0.17364	0.122784	0.301903	0.270477	0.24173	0.170289	0.218242	0.324599	0.262383	0.221678	0.171964	0.170513
SOX11.S	0.370174	0.305955	0.245046	0.21419	0.195209	0.328646	0.282362	0.218323	0.230741	0.191058	0.34941	0.294158	0.231684	0.222466	0.193133
SP3.L	0.442429	0.392463	0.307261	0.310552	0.283311	0.424541	0.38412	0.337149	0.3424	0.269484	0.433485	0.388292	0.322205	0.326476	0.276397
SPAG5.L	0.3241	0.360551	0.299787	0.205661	0.204425	0.342008	0.37687	0.335101	0.288692	0.227189	0.333054	0.36871	0.317444	0.247176	0.215807
SPATS2.S	0.346089	0.283882	0.264794	0.2022	0.149879	0.282058	0.271625	0.228669	0.178941	0.134898	0.314073	0.277753	0.246731	0.19057	0.142389
SPOPL-LIKE.S	0.405358	0.290377	0.28279	0.2458	0.18731	0.364382	0.268864	0.2384	0.218484	0.192628	0.38487	0.27962	0.260595	0.232142	0.189969
SPRY1.L	0.398202	0.336395	0.335435	0.142462	0.0967339	0.244771	0.294094	0.209399	0.218834	0.219646	0.321487	0.315245	0.272417	0.180648	0.15819
SRPR-LIKE.L	0.523098	0.244569	0.35608	0.246952	0.223781	0.239895	0.308531	0.202028	0.150062	0.149487	0.381497	0.27655	0.279054	0.198507	0.186634
ST13.L	0.363768	0.362114	0.335989	0.21643	0.191306	0.380493	0.321345	0.364194	0.262434	0.187953	0.372131	0.34173	0.350092	0.239432	0.18963
ST13.S	0.457678	0.414755	0.322793	0.232276	0.215647	0.415438	0.331557	0.357528	0.283122	0.199327	0.436558	0.373156	0.34016	0.257699	0.207487
STAM2.L	0.364003	0.341252	0.27792	0.16144	0.228791	0.296648	0.271117	0.25387	0.227862	0.125185	0.330326	0.306185	0.265895	0.194651	0.176988
STARD7.S	0.306891	0.304684	0.25149	0.212614	0.134363	0.282737	0.427148	0.286556	0.243817	0.208672	0.294814	0.365916	0.269023	0.228216	0.171518
STAU1.S	0.385039	0.374876	0.278066	0.25826	0.19928	0.402325	0.304699	0.336309	0.221437	0.199589	0.393682	0.339788	0.307187	0.239849	0.199434
STK33.S	0.362123	0.28664	0.237747	0.189809	0.103853	0.260696	0.281115	0.193676	0.21743	0.21778	0.311409	0.283878	0.215712	0.203619	0.160817
STK38-LIKE.S	0.438601	0.384063	0.301024	0.292299	0.251711	0.352832	0.299518	0.274167	0.293073	0.196084	0.395717	0.34179	0.287595	0.292686	0.223898
STRADA.S	0.28635	0.477303	0.343064	0.158701	0.239331	0.35033	0.372637	0.290354	0.257662	0.154843	0.31834	0.42497	0.316709	0.208182	0.197087
STRN3.L	0.46036	0.346243	0.295796	0.236746	0.224096	0.397405	0.337504	0.277027	0.332214	0.279505	0.428883	0.341873	0.286412	0.28448	0.2518
SVIL.L	0.385779	0.387998	0.256899	0.263909	0.130955	0.347384	0.321786	0.239333	0.235637	0.199545	0.366582	0.354892	0.248116	0.249773	0.16525
SVIL.S	0.322739	0.300382	0.168903	0.165124	0.161151	0.409375	0.362325	0.347341	0.298001	0.233555	0.366057	0.331354	0.258122	0.231562	0.197353
SYNJ2BP.L	0.497838	0.333029	0.295941	0.242411	0.257703	0.317165	0.379547	0.240896	0.338626	0.187541	0.407502	0.356288	0.268419	0.290519	0.222622
TADA1.L	0.341121	0.336087	0.291586	0.159195	0.129584	0.326635	0.387524	0.477592	0.330695	0.306474	0.333878	0.361806	0.384589	0.244945	0.218029
TAF12.L	0.432218	0.565594	0.346371	0.274076	0.192644	0.467786	0.4967	0.462925	0.431436	0.218893	0.450002	0.531147	0.404648	0.352756	0.205769
TAF12.S	0.394286	0.412583	0.205069	0.215684	0.163683	0.431506	0.427718	0.30288	0.336409	0.123671	0.412896	0.42015	0.253975	0.276047	0.143677
TAF1A.L	0.348012	0.283236	0.271804	0.145235	0.186936	0.331199	0.26435	0.275982	0.254384	0.163606	0.339605	0.273793	0.273893	0.199809	0.175271
TBC1D10A.L	0.373786	0.372241	0.301263	0.230965	0.187525	0.389116	0.394035	0.369795	0.371795	0.263456	0.381451	0.383138	0.335529	0.30138	0.22549
TBC1D10A.S	0.371562	0.240953	0.270068	0.144578	0.170375	0.347974	0.33493	0.260711	0.252953	0.185607	0.359768	0.287941	0.26539	0.198766	0.177991
TBC1D12.L	0.510291	0.38851	0.263984	0.21657	0.187234	0.360641	0.384658	0.289775	0.286332	0.219315	0.435466	0.386584	0.276879	0.251451	0.203274
TBC1D14-LIKE.S	0.513548	0.338946	0.313679	0.18252	0.221566	0.303604	0.317435	0.306608	0.187999	0.173246	0.408576	0.328191	0.310143	0.18526	0.197406
TBC1D15.L	0.266698	0.27171	0.182343	0.1668	0.122654	0.236088	0.327359	0.316168	0.253101	0.171956	0.251393	0.299534	0.249256	0.20995	0.147305
TBCB.S	0.314676	0.341106	0.287093	0.223759	0.19726	0.309096	0.328555	0.238335	0.249995	0.169224	0.311886	0.33483	0.262714	0.236877	0.183242
TCF25.L	0.337776	0.288744	0.161519	0.17964	0.159201	0.396842	0.290512	0.286126	0.1876	0.169834	0.367309	0.289628	0.223823	0.18362	0.164517
TCP1.L	0.60142	0.644713	0.347437	0.280119	0.339264	0.429445	0.414414	0.501565	0.48604	0.379094	0.515433	0.529564	0.424501	0.383079	0.359179
TCP1.S	0.315889	0.339452	0.153821	0.128591	0.311388	0.544768	0.367237	0.463695	0.324465	0.153936	0.430328	0.353344	0.308758	0.226528	0.232662
TFDP2.L	0.357286	0.345774	0.252201	0.249763	0.141776	0.402034	0.374731	0.343059	0.268853	0.194916	0.37966	0.360252	0.29763	0.259308	0.168346
THOC5.S	0.3948	0.445709	0.225319	0.265144	0.182924	0.38477	0.406837	0.378289	0.262836	0.273717	0.389785	0.426273	0.301804	0.26399	0.228321
THOP1.L	0.349282	0.31458	0.257876	0.262006	0.248321	0.372552	0.431303	0.287943	0.183777	0.258335	0.360917	0.372941	0.272909	0.222892	0.253328
TMCC3.S	0.366546	0.322361	0.254233	0.195436	0.120847	0.312282	0.289518	0.200806	0.223897	0.191205	0.339414	0.305939	0.22752	0.209667	0.156026
TMEM110.2.L	0.449336	0.221382	0.278261	0.196862	0.172483	0.262765	0.262372	0.206119	0.103941	0.136946	0.35605	0.241877	0.24219	0.150401	0.154715
TMEM170A.S	0.373179	0.340919	0.306848	0.298133	0.263086	0.40578	0.371433	0.313497	0.219266	0.172644	0.38948	0.356176	0.310173	0.258699	0.217865
TMEM19.L	0.466709	0.437659	0.267905	0.347367	0.163406	0.387352	0.324883	0.314346	0.270721	0.240626	0.42703	0.381271	0.291125	0.309044	0.202016
TMEM214.L	0.358054	0.358387	0.252358	0.298751	0.20448	0.391647	0.323988	0.235003	0.253805	0.176302	0.374851	0.341188	0.243681	0.276278	0.190391
TMEM260-LIKE.L	0.364421	0.323171	0.278582	0.192961	0.166026	0.268475	0.286112	0.181435	0.20312	0.126834	0.316448	0.304641	0.230008	0.198041	0.14643
TMX3.L	0.442755	0.381283	0.259249	0.308125	0.193739	0.361112	0.445727	0.380571	0.309596	0.303669	0.401933	0.413505	0.31991	0.30886	0.248704
TNKS2.S	0.359319	0.377899	0.273432	0.273683	0.147579	0.351219	0.395498	0.282315	0.233114	0.229023	0.355269	0.386698	0.277873	0.253398	0.188301
TNPO2-LIKE.S	0.337109	0.515412	0.290727	0.229848	0.158216	0.260443	0.313724	0.266774	0.234959	0.176093	0.298776	0.414568	0.27875	0.232404	0.167154
TOB2.L	0.52984	0.427443	0.371863	0.274007	0.196485	0.395964	0.384466	0.31732	0.370599	0.333237	0.462902	0.405955	0.344591	0.322303	0.264861
TOX4.L	0.374052	0.38871	0.268689	0.199423	0.145746	0.392191	0.326061	0.388648	0.292996	0.282347	0.383122	0.357386	0.328669	0.24621	0.214047
TRAF3IP1.L	0.305854	0.351123	0.280639	0.225623	0.217865	0.420037	0.415765	0.360963	0.297406	0.22891	0.362946	0.383444	0.320801	0.261514	0.223388
TRIAP1.L	0.306553	0.271438	0.247252	0.133606	0.248168	0.257825	0.374002	0.137315	0.114983	0.155657	0.282189	0.32272	0.192283	0.124295	0.201912
TRMT10C.S	0.229628	0.240458	0.179075	0.0990925	0.0863643	0.242374	0.290911	0.262755	0.199293	0.12373	0.236001	0.265685	0.220915	0.149193	0.105047
TRMT6.L	0.428608	0.352883	0.261399	0.192912	0.246976	0.379781	0.356087	0.305419	0.283776	0.271218	0.404194	0.354485	0.283409	0.238344	0.259097
TUBA4B.S	0.398572	0.332258	0.223397	0.174047	0.209605	0.291786	0.343525	0.209931	0.141486	0.156769	0.345179	0.337892	0.216664	0.157767	0.183187
TUFT1.L	0.338105	0.352418	0.318446	0.283284	0.193107	0.433212	0.485338	0.519925	0.300858	0.262453	0.385659	0.418878	0.419186	0.292071	0.22778
UBE2D1.L	0.38878	0.349842	0.283563	0.243206	0.205361	0.392753	0.346475	0.389068	0.312931	0.265195	0.390767	0.348159	0.336315	0.278068	0.235278
UBE2L3.S	0.368078	0.330337	0.246044	0.143482	0.198052	0.405026	0.402973	0.34213	0.313053	0.233696	0.386552	0.366655	0.294087	0.228267	0.215874
UBE2V1.S	0.371968	0.249412	0.278623	0.19894	0.200096	0.431681	0.358137	0.335884	0.330199	0.249932	0.401825	0.303774	0.307254	0.264569	0.225014
UBE2V2.L	0.45886	0.317166	0.299184	0.269713	0.19409	0.301499	0.281174	0.245905	0.328515	0.205501	0.38018	0.29917	0.272544	0.299114	0.199796
UBFD1.S	0.369384	0.281937	0.213679	0.127299	0.0483825	0.268082	0.258963	0.304176	0.231333	0.192428	0.318733	0.27045	0.258927	0.179316	0.120405
UBR7.S	0.380226	0.336201	0.202949	0.223623	0.13376	0.359768	0.336558	0.376777	0.246613	0.302404	0.369997	0.33638	0.289863	0.235118	0.218082
UBTD2.L	0.334263	0.316998	0.270311	0.232229	0.207069	0.325669	0.306017	0.180708	0.14065	0.118661	0.329966	0.311508	0.22551	0.18644	0.162865
UBXN2A.S	0.389836	0.261168	0.258689	0.206627	0.121974	0.270859	0.264001	0.188922	0.258874	0.22515	0.330348	0.262584	0.223805	0.232751	0.173562
UCHL3.L	0.246699	0.311446	0.184666	0.285574	0.173546	0.365287	0.336667	0.274857	0.187337	0.144537	0.305993	0.324056	0.229761	0.236455	0.159042
UNC5B-LIKE.S	0.434748	0.433847	0.330787	0.299201	0.204956	0.351159	0.37921	0.280043	0.258201	0.216543	0.392953	0.406528	0.305415	0.278701	0.21075
USP19.L	0.338838	0.323787	0.250103	0.21328	0.184116	0.361873	0.366966	0.320202	0.247526	0.206334	0.350355	0.345376	0.285153	0.230403	0.195225
USP9X.S	0.354631	0.311745	0.287201	0.220111	0.187517	0.38367	0.372614	0.289128	0.288415	0.249781	0.36915	0.342179	0.288164	0.254263	0.218649
UTP11L.L	0.356296	0.38353	0.30752	0.235299	0.200552	0.404291	0.39347	0.361082	0.307427	0.234522	0.380294	0.3885	0.334301	0.271363	0.217537
UTP3.L	0.426165	0.376612	0.311461	0.231019	0.215754	0.501058	0.452606	0.501568	0.44857	0.34044	0.463611	0.414609	0.406515	0.339794	0.278097
UTP3.S	0.416678	0.368154	0.258149	0.208397	0.181663	0.503852	0.42851	0.463586	0.374364	0.269024	0.460265	0.398332	0.360868	0.29138	0.225343
VAMP8.L	0.459575	0.384887	0.352624	0.276112	0.238249	0.383419	0.374247	0.285996	0.299843	0.255318	0.421497	0.379567	0.31931	0.287978	0.246783
VARS.L	0.312341	0.286678	0.255633	0.211932	0.225327	0.410609	0.307259	0.295816	0.262851	0.156927	0.361475	0.296969	0.275724	0.237391	0.191127
VAT1.S	0.395633	0.435476	0.32495	0.308898	0.236838	0.484218	0.343106	0.430271	0.344207	0.229621	0.439925	0.389291	0.37761	0.326553	0.23323
VELO1.L	0.472819	0.479828	0.38837	0.257871	0.209712	0.544576	0.469024	0.503378	0.460512	0.366217	0.508698	0.474426	0.445874	0.359191	0.287965
VPS37B.L	0.277396	0.255572	0.189562	0.239187	0.131015	0.33814	0.331854	0.226248	0.215056	0.162059	0.307768	0.293713	0.207905	0.227121	0.146537
WBP1.S	0.397065	0.336239	0.155384	0.263776	0.195347	0.302155	0.2831	0.285493	0.264762	0.186237	0.34961	0.309669	0.220439	0.264269	0.190792
WBP11.L	0.306284	0.37207	0.296121	0.213868	0.20539	0.345335	0.360957	0.31252	0.297362	0.209752	0.325809	0.366514	0.304321	0.255615	0.207571
WDFY1-LIKE.L	0.348579	0.271706	0.189317	0.193748	0.113073	0.271371	0.268598	0.208983	0.156847	0.133456	0.309975	0.270152	0.19915	0.175298	0.123264
WDR3.1	0.314822	0.32203	0.220338	0.242847	0.116938	0.344498	0.289083	0.303237	0.258453	0.172288	0.32966	0.305557	0.261788	0.25065	0.144613
WDR44.S	0.317846	0.306523	0.235808	0.185832	0.159012	0.405192	0.347835	0.25984	0.197069	0.171456	0.361519	0.327179	0.247824	0.19145	0.165234
WDR46.L	0.325499	0.325653	0.237924	0.161497	0.168434	0.358	0.356422	0.350432	0.282208	0.172709	0.34175	0.341038	0.294178	0.221853	0.170571
WDR81.L	0.240232	0.363525	0.289758	0.201526	0.186341	0.297325	0.356459	0.263593	0.269552	0.154551	0.268778	0.359992	0.276676	0.235539	0.170446
WIBG.L	0.311302	0.287654	0.256994	0.157241	0.159856	0.307474	0.360403	0.279248	0.268859	0.146321	0.309388	0.324028	0.268121	0.21305	0.153088
WNT11B.L	0.535369	0.433176	0.342532	0.327603	0.220612	0.549278	0.515423	0.521968	0.547878	0.465381	0.542323	0.4743	0.43225	0.43774	0.342997
XELAEV18000743M	0.371627	0.331452	0.177365	0.197566	0.119593	0.308868	0.322837	0.245092	0.158099	0.232433	0.340248	0.327144	0.211229	0.177833	0.176013
XELAEV18001138M	0.333658	0.258247	0.162618	0.204222	0.163957	0.28888	0.287079	0.227447	0.213766	0.150708	0.311269	0.272663	0.195032	0.208994	0.157333
XELAEV18001297M	0.621319	0.612555	0.460059	0.342958	0.293563	0.455558	0.304537	0.409609	0.437439	0.373661	0.538439	0.458546	0.434834	0.390199	0.333612
XELAEV18001373M	0.472329	0.364642	0.270417	0.218939	0.254918	0.481073	0.377622	0.37766	0.339394	0.196775	0.476701	0.371132	0.324038	0.279166	0.225847
XELAEV18001820M	0.474565	0.351915	0.386039	0.266258	0.125526	0.340961	0.289226	0.267405	0.327699	0.376836	0.407763	0.32057	0.326722	0.296978	0.251181
XELAEV18001936M	0.370171	0.316125	0.261678	0.253056	0.206278	0.395437	0.406008	0.311255	0.288643	0.172614	0.382804	0.361067	0.286466	0.270849	0.189446
XELAEV18002161M	0.402654	0.254928	0.182747	0.140419	0.204867	0.444075	0.379085	0.296329	0.290689	0.135259	0.423365	0.317006	0.239538	0.215554	0.170063
XELAEV18002308M	0.259192	0.276567	0.255183	0.144964	0.194559	0.340727	0.402863	0.24414	0.224111	0.271312	0.29996	0.339715	0.249661	0.184537	0.232936
XELAEV18002361M	0.411976	0.343046	0.25057	0.129398	0.170881	0.353725	0.319136	0.366141	0.291303	0.283473	0.38285	0.331091	0.308355	0.21035	0.227177
XELAEV18003594M	0.37614	0.305178	0.234323	0.180326	0.143819	0.491844	0.355044	0.334946	0.254796	0.171328	0.433992	0.330111	0.284635	0.217561	0.157573
XELAEV18003966M	0.546287	0.461221	0.298089	0.437742	0.28022	0.438033	0.400049	0.450638	0.334349	0.152179	0.49216	0.430635	0.374364	0.386046	0.2162
XELAEV18004063M	0.522435	0.377143	0.275388	0.291789	0.253804	0.388147	0.375361	0.308136	0.250234	0.162476	0.455291	0.376252	0.291762	0.271012	0.20814
XELAEV18004066M	0.323632	0.247611	0.174986	0.204675	0.111605	0.271476	0.279978	0.268644	0.235622	0.14685	0.297554	0.263794	0.221815	0.220148	0.129228
XELAEV18004182M	0.412729	0.380201	0.262606	0.235167	0.182909	0.495279	0.317649	0.39769	0.270429	0.325098	0.454004	0.348925	0.330148	0.252798	0.254003
XELAEV18005235M	0.371189	0.47015	0.325805	0.144769	0.351469	0.346915	0.307476	0.281359	0.279562	0.146187	0.359052	0.388813	0.303582	0.212166	0.248828
XELAEV18005728M	0.442831	0.332877	0.327893	0.254913	0.243138	0.363759	0.354606	0.313461	0.301174	0.230945	0.403295	0.343742	0.320677	0.278044	0.237042
XELAEV18005767M	0.396213	0.305698	0.287667	0.222898	0.192186	0.484764	0.365266	0.395496	0.301106	0.268844	0.440488	0.335482	0.341582	0.262002	0.230515
XELAEV18005866M	0.549364	0.459687	0.353937	0.319002	0.265746	0.420993	0.392306	0.296726	0.365499	0.267654	0.485179	0.425996	0.325331	0.342251	0.2667
XELAEV18006227M	0.58268	0.73614	0.410489	0.395075	0.183712	0.49017	0.389791	0.386831	0.324208	0.318334	0.536425	0.562966	0.39866	0.359641	0.251023
XELAEV18006307M	0.410659	0.376039	0.33086	0.276313	0.239687	0.44109	0.428614	0.392528	0.387049	0.311363	0.425875	0.402326	0.361694	0.331681	0.275525
XELAEV18006966M	0.415321	0.429525	0.272702	0.214577	0.179997	0.488481	0.394447	0.439755	0.327156	0.219225	0.451901	0.411986	0.356229	0.270866	0.199611
XELAEV18007046M	0.333067	0.31116	0.313693	0.247216	0.150152	0.395579	0.430678	0.302774	0.316022	0.244089	0.364323	0.370919	0.308233	0.281619	0.197121
XELAEV18007581M	0.383367	0.410835	0.265508	0.161638	0.180709	0.287137	0.275321	0.254055	0.196439	0.126994	0.335252	0.343078	0.259782	0.179038	0.153851
XELAEV18007714M	0.370629	0.333438	0.26783	0.190612	0.165965	0.457877	0.394342	0.412302	0.335339	0.264545	0.414253	0.36389	0.340066	0.262976	0.215255
XELAEV18007720M	0.449985	0.351652	0.264325	0.207071	0.180697	0.3737	0.337828	0.227855	0.248449	0.203503	0.411843	0.34474	0.24609	0.22776	0.1921
XELAEV18008232M	0.193872	0.263556	0.235523	0.154461	0.108266	0.227035	0.316231	0.217766	0.126714	0.107069	0.210454	0.289893	0.226645	0.140588	0.107668
XELAEV18008243M	0.390542	0.274629	0.243995	0.191421	0.166442	0.286328	0.240607	0.203784	0.162202	0.170709	0.338435	0.257618	0.223889	0.176812	0.168575
XELAEV18008262M	0.372336	0.275256	0.271125	0.130453	0.240444	0.407888	0.40271	0.359144	0.253271	0.205128	0.390112	0.338983	0.315134	0.191862	0.222786
XELAEV18008335M	0.386618	0.43214	0.274447	0.291615	0.307198	0.524511	0.365061	0.322896	0.368299	0.194064	0.455565	0.398601	0.298671	0.329957	0.250631
XELAEV18009418M	0.440986	0.324458	0.268846	0.250556	0.258212	0.343817	0.285846	0.289141	0.271336	0.204628	0.392402	0.305152	0.278993	0.260946	0.23142
XELAEV18009456M	0.40418	0.372951	0.350182	0.279896	0.228244	0.404274	0.329787	0.343345	0.277038	0.196812	0.404227	0.351369	0.346763	0.278467	0.212528
XELAEV18009743M	0.555574	0.614397	0.536171	0.173479	0.189858	0.625041	0.496576	0.497342	0.46877	0.278812	0.590307	0.555487	0.516756	0.321125	0.234335
XELAEV18009884M	0.360815	0.289354	0.312558	0.221941	0.18988	0.372276	0.329497	0.253514	0.301931	0.224369	0.366546	0.309425	0.283036	0.261936	0.207125
XELAEV18010175M	0.538064	0.505688	0.355478	0.234156	0.224634	0.560176	0.473359	0.472115	0.381223	0.22493	0.54912	0.489523	0.413797	0.307689	0.224782
XELAEV18010480M	0.327729	0.401879	0.269061	0.231906	0.147378	0.404973	0.37821	0.388099	0.271703	0.171208	0.366351	0.390044	0.32858	0.251804	0.159293
XELAEV18010555M	0.332424	0.255567	0.279323	0.214865	0.178727	0.427534	0.341209	0.357727	0.275199	0.195536	0.379979	0.298388	0.318525	0.245032	0.187131
XELAEV18010999M	0.407668	0.464929	0.298222	0.189228	0.302161	0.45101	0.375862	0.240838	0.297846	0.102535	0.429339	0.420395	0.26953	0.243537	0.202348
XELAEV18011680M	0.581362	0.386975	0.347101	0.286732	0.221122	0.48672	0.421399	0.305858	0.344139	0.297274	0.534041	0.404187	0.32648	0.315435	0.259198
XELAEV18011698M	0.345766	0.286718	0.21099	0.185549	0.0965436	0.360266	0.368303	0.287342	0.266709	0.138734	0.353016	0.327511	0.249166	0.226129	0.117639
XELAEV18011701M	0.363036	0.500922	0.281476	0.301061	0.246052	0.365098	0.325151	0.248573	0.213896	0.19024	0.364067	0.413036	0.265025	0.257478	0.218146
XELAEV18011849M	0.387104	0.367757	0.284427	0.225787	0.147957	0.401678	0.354585	0.328716	0.300594	0.260054	0.394391	0.361171	0.306572	0.263191	0.204006
XELAEV18012131M	0.412698	0.351862	0.0841437	0.102775	0.191709	0.466441	0.445458	0.406116	0.328406	0.216285	0.43957	0.39866	0.24513	0.215591	0.203997
XELAEV18012451M	0.558855	0.411256	0.444221	0.385687	0.268575	0.495522	0.495062	0.440227	0.509158	0.394037	0.527189	0.453159	0.442224	0.447423	0.331306
XELAEV18012629M	0.337936	0.494881	0.248566	0.325661	0.273175	0.384017	0.388907	0.34937	0.267714	0.167675	0.360977	0.441894	0.298968	0.296688	0.220425
XELAEV18012848M	0.178774	0.253357	0.242731	0.146456	0.110035	0.362083	0.299018	0.162671	0.273935	0.138575	0.270428	0.276188	0.202701	0.210195	0.124305
XELAEV18012938M	0.467014	0.349256	0.187176	0.109961	0.252833	0.358259	0.398482	0.242438	0.201995	0.16661	0.412637	0.373869	0.214807	0.155978	0.209722
XELAEV18013813M	0.557548	0.504957	0.357086	0.353198	0.288558	0.441777	0.421826	0.340406	0.432819	0.325035	0.499662	0.463392	0.348746	0.393009	0.306796
XELAEV18014171M	0.592393	0.612579	0.519108	0.517556	0.287539	0.529254	0.406003	0.500237	0.427583	0.301109	0.560823	0.509291	0.509673	0.472569	0.294324
XELAEV18015067M	0.419932	0.382428	0.268268	0.237732	0.209968	0.415012	0.394315	0.328276	0.39861	0.281044	0.417472	0.388371	0.298272	0.318171	0.245506
XELAEV18015136M	0.52474	0.301624	0.387056	0.309676	0.136169	0.32785	0.283326	0.26175	0.270094	0.242349	0.426295	0.292475	0.324403	0.289885	0.189259
XELAEV18015396M	0.436687	0.457586	0.295814	0.0729262	0.193681	0.336424	0.299267	0.248907	0.206647	0.193304	0.386556	0.378427	0.27236	0.139786	0.193493
XELAEV18015615M	0.388818	0.267302	0.162883	0.203088	0.152118	0.245365	0.296703	0.188748	0.242466	0.119626	0.317091	0.282003	0.175816	0.222777	0.135872
XELAEV18015849M	0.510023	0.397616	0.342373	0.301524	0.248981	0.304288	0.382548	0.200295	0.230756	0.196044	0.407156	0.390082	0.271334	0.26614	0.222512
XELAEV18015864M	0.398125	0.25292	0.282851	0.229737	0.254803	0.440629	0.392367	0.299928	0.362745	0.250701	0.419377	0.322644	0.29139	0.296241	0.252752
XELAEV18015871M	0.456288	0.370641	0.318905	0.262786	0.222953	0.413459	0.393187	0.314429	0.35645	0.273149	0.434874	0.381914	0.316667	0.309618	0.248051
XELAEV18015973M	0.368546	0.208523	0.20736	0.133249	0.132703	0.231599	0.303588	0.206786	0.167981	0.111597	0.300072	0.256056	0.207073	0.150615	0.12215
XELAEV18016211M	0.294018	0.49718	0.226216	0.184201	0.220176	0.425374	0.385064	0.337575	0.318584	0.19998	0.359696	0.441122	0.281896	0.251392	0.210078
XELAEV18016823M	0.474509	0.273888	0.341207	0.231784	0.21466	0.366414	0.348201	0.295035	0.310117	0.253319	0.420461	0.311045	0.318121	0.270951	0.233989
XELAEV18016915M	0.575002	0.497671	0.351538	0.424801	0.271174	0.50028	0.432383	0.429554	0.394991	0.36755	0.537641	0.465027	0.390546	0.409896	0.319362
XELAEV18017255M	0.275934	0.25397	0.261549	0.176624	0.131105	0.348841	0.344165	0.186735	0.173428	0.107718	0.312387	0.299068	0.224142	0.175026	0.119412
XELAEV18017300M	0.483191	0.385855	0.300368	0.258825	0.403152	0.351983	0.343409	0.314817	0.243904	0.17428	0.417587	0.364632	0.307592	0.251365	0.288716
XELAEV18017565M	0.425441	0.367471	0.290906	0.228621	0.200826	0.41545	0.31943	0.327304	0.227926	0.19299	0.420445	0.343451	0.309105	0.228274	0.196908
XELAEV18017694M	0.587825	0.479097	0.338065	0.263566	0.233157	0.429793	0.419992	0.378048	0.411638	0.286502	0.508809	0.449544	0.358057	0.337602	0.25983
XELAEV18018189M	0.392383	0.278899	0.314915	0.219025	0.169761	0.342372	0.346802	0.27208	0.239824	0.212259	0.367377	0.312851	0.293497	0.229425	0.19101
XELAEV18018449M	0.474616	0.477604	0.372894	0.245191	0.137376	0.410071	0.366507	0.410567	0.280847	0.223991	0.442344	0.422055	0.391731	0.263019	0.180684
XELAEV18018533M	0.378169	0.390441	0.266926	0.222874	0.218745	0.463789	0.376339	0.38224	0.332535	0.231144	0.420979	0.38339	0.324583	0.277705	0.224944
XELAEV18018631M	0.589844	0.263005	0.199789	0.264039	0.17396	0.267086	0.300008	0.286065	0.243959	0.230035	0.428465	0.281506	0.242927	0.253999	0.201998
XELAEV18019581M	0.457709	0.483785	0.324701	0.292928	0.213281	0.479421	0.418128	0.504451	0.484883	0.386694	0.468565	0.450956	0.414576	0.388905	0.299988
XELAEV18019799M	0.428303	0.490342	0.320204	0.144049	0.10201	0.346284	0.37897	0.380579	0.271361	0.275643	0.387294	0.434656	0.350392	0.207705	0.188826
XELAEV18019871M	0.381967	0.344788	0.328666	0.26127	0.24028	0.421058	0.466186	0.367933	0.425465	0.242494	0.401513	0.405487	0.348299	0.343368	0.241387
XELAEV18019899M	0.453837	0.354499	0.305623	0.261371	0.129888	0.365222	0.439648	0.382437	0.442859	0.387514	0.40953	0.397074	0.34403	0.352115	0.258701
XELAEV18019988M	0.423746	0.2994	0.241262	0.306535	0.209499	0.322725	0.322014	0.219367	0.239544	0.194217	0.373236	0.310707	0.230315	0.27304	0.201858
XELAEV18020171M	0.395957	0.422814	0.232924	0.139963	0.108466	0.49999	0.440475	0.315704	0.436626	0.332096	0.447974	0.431644	0.274314	0.288294	0.220281
XELAEV18020197M	0.478945	0.531354	0.435421	0.304429	0.224413	0.562088	0.42021	0.579481	0.459756	0.330254	0.520517	0.475782	0.507451	0.382093	0.277333
XELAEV18021042M	0.412224	0.348128	0.237054	0.206542	0.190759	0.441465	0.336532	0.357138	0.261009	0.298711	0.426844	0.34233	0.297096	0.233776	0.244735
XELAEV18021149M	0.444261	0.344808	0.249714	0.214891	0.19776	0.424973	0.317768	0.342497	0.218643	0.194915	0.434617	0.331288	0.296105	0.216767	0.196338
XELAEV18021206M	0.366967	0.389764	0.367554	0.303176	0.209905	0.385691	0.333437	0.296351	0.277847	0.164675	0.376329	0.3616	0.331952	0.290511	0.18729
XELAEV18021245M	0.422387	0.331359	0.328916	0.284202	0.238764	0.38819	0.356799	0.227062	0.301036	0.268652	0.405289	0.344079	0.277989	0.292619	0.253708
XELAEV18021410M	0.307283	0.232283	0.200462	0.178282	0.190234	0.306744	0.315691	0.159634	0.174731	0.0949939	0.307014	0.273987	0.180048	0.176507	0.142614
XELAEV18021632M	0.498977	0.441821	0.308761	0.228327	0.214975	0.518844	0.454069	0.431504	0.350506	0.253874	0.508911	0.447945	0.370132	0.289416	0.234424
XELAEV18022181M	0.34593	0.281568	0.295391	0.241886	0.202516	0.284112	0.331204	0.249519	0.165815	0.12569	0.315021	0.306386	0.272455	0.203851	0.164103
XELAEV18022218M	0.403368	0.273427	0.236182	0.19818	0.174103	0.358431	0.297495	0.268734	0.175914	0.19397	0.380899	0.285461	0.252458	0.187047	0.184037
XELAEV18022647M	0.421049	0.320235	0.219083	0.156503	0.21444	0.364076	0.324417	0.223745	0.268203	0.195449	0.392562	0.322326	0.221414	0.212353	0.204945
XELAEV18022836M	0.276648	0.198926	0.162226	0.145154	0.0652599	0.376572	0.293211	0.212789	0.199349	0.163811	0.32661	0.246068	0.187507	0.172252	0.114535
XELAEV18022965M	0.394396	0.259501	0.250421	0.277488	0.16314	0.374522	0.334524	0.303864	0.254657	0.246747	0.384459	0.297012	0.277142	0.266073	0.204944
XELAEV18023153M	0.371949	0.320128	0.220767	0.23978	0.166585	0.271018	0.281582	0.223885	0.18374	0.138824	0.321484	0.300855	0.222326	0.21176	0.152704
XELAEV18023465M	0.550634	0.38511	0.398484	0.385033	0.226275	0.412797	0.459651	0.268521	0.353912	0.38174	0.481715	0.42238	0.333502	0.369473	0.304008
XELAEV18023965M	0.337692	0.445921	0.220317	0.23338	0.141109	0.499045	0.348928	0.449197	0.32807	0.258514	0.418369	0.397425	0.334757	0.280725	0.199812
XELAEV18024074M	0.443757	0.359341	0.298937	0.259071	0.200417	0.291704	0.346726	0.28251	0.214571	0.230225	0.36773	0.353034	0.290724	0.236821	0.215321
XELAEV18024227M	0.398798	0.394011	0.298076	0.200052	0.246313	0.401341	0.404837	0.354546	0.282955	0.288346	0.40007	0.399424	0.326311	0.241503	0.267329
XELAEV18024282M	0.513385	0.613669	0.398341	0.246792	0.225494	0.54306	0.476808	0.582342	0.413053	0.328529	0.528223	0.545238	0.490342	0.329922	0.277011
XELAEV18024392M	0.356325	0.266623	0.253536	0.200791	0.20976	0.377962	0.319044	0.280584	0.163023	0.194224	0.367143	0.292833	0.26706	0.181907	0.201992
XELAEV18024564M	0.399484	0.263992	0.241111	0.182497	0.17067	0.389451	0.381713	0.220791	0.276307	0.227706	0.394468	0.322853	0.230951	0.229402	0.199188
XELAEV18024625M	0.470136	0.388451	0.333515	0.297565	0.282277	0.379324	0.377847	0.24031	0.331762	0.192135	0.42473	0.383149	0.286913	0.314664	0.237206
XELAEV18024849M	0.353147	0.305195	0.26808	0.237093	0.169864	0.409578	0.403728	0.327671	0.272094	0.224933	0.381363	0.354462	0.297875	0.254593	0.197398
XELAEV18024869M	0.407777	0.394407	0.257016	0.328308	0.298003	0.392466	0.353568	0.331048	0.276676	0.155484	0.400121	0.373988	0.294032	0.302492	0.226744
XELAEV18024927M	0.389646	0.426138	0.295845	0.271128	0.24334	0.419449	0.387459	0.329048	0.311209	0.251551	0.404548	0.406799	0.312447	0.291168	0.247446
XELAEV18025038M	0.425242	0.482599	0.297334	0.308158	0.222903	0.373452	0.350875	0.386001	0.318602	0.266268	0.399347	0.416737	0.341667	0.31338	0.244585
XELAEV18025105M	0.383592	0.230499	0.213903	0.251625	0.177108	0.323615	0.283741	0.258932	0.232827	0.213637	0.353604	0.25712	0.236417	0.242226	0.195373
XELAEV18025241M	0.343447	0.324926	0.19163	0.139868	0.123712	0.275129	0.343884	0.174952	0.168696	0.12146	0.309288	0.334405	0.183291	0.154282	0.122586
XELAEV18025326M	0.304096	0.257707	0.169592	0.161468	0.135108	0.301816	0.290563	0.309238	0.211104	0.149583	0.302956	0.274135	0.239415	0.186286	0.142346
XELAEV18025397M	0.336304	0.296232	0.246914	0.218411	0.173611	0.40334	0.350761	0.348294	0.277188	0.248	0.369822	0.323497	0.297604	0.247799	0.210806
XELAEV18025417M	0.639136	0.58065	0.306761	0.401053	0.325577	0.37062	0.428369	0.376867	0.328073	0.434786	0.504878	0.504509	0.341814	0.364563	0.380181
XELAEV18025534M	0.460718	0.388719	0.440831	0.142404	0.195015	0.348069	0.29724	0.261085	0.292579	0.233932	0.404393	0.342979	0.350958	0.217491	0.214474
XELAEV18025612M	0.383088	0.33241	0.223154	0.220755	0.176549	0.250937	0.242015	0.241544	0.192093	0.151893	0.317012	0.287212	0.232349	0.206424	0.164221
XELAEV18026022M	0.414603	0.315562	0.268196	0.185652	0.165844	0.339562	0.338915	0.254065	0.267509	0.198097	0.377082	0.327238	0.261131	0.22658	0.18197
XELAEV18026320M	0.28281	0.402713	0.228967	0.0901537	0.104286	0.353866	0.417129	0.364342	0.472779	0.257616	0.318338	0.409921	0.296654	0.281467	0.180951
XELAEV18026409M	0.186799	0.267303	0.207035	0.0486577	0.20495	0.307414	0.3818	0.252709	0.291834	0.104246	0.247107	0.324551	0.229872	0.170246	0.154598
XELAEV18026803M	0.518886	0.352219	0.457809	0.296024	0.216067	0.394479	0.479627	0.29	0.408818	0.267624	0.456683	0.415923	0.373904	0.352421	0.241845
XELAEV18027479M	0.434952	0.35754	0.273085	0.29569	0.165708	0.309227	0.296923	0.316904	0.290293	0.233808	0.372089	0.327231	0.294995	0.292991	0.199758
XELAEV18028042M	0.382032	0.390003	0.219572	0.247632	0.176904	0.352157	0.373984	0.238882	0.200856	0.186733	0.367094	0.381994	0.229227	0.224244	0.181819
XELAEV18028646M	0.507075	0.418529	0.268847	0.30366	0.227477	0.38698	0.381911	0.312144	0.311142	0.266625	0.447028	0.40022	0.290495	0.307401	0.247051
XELAEV18028665M	0.32873	0.258847	0.190281	0.0912966	0.0952517	0.25428	0.244025	0.167313	0.195495	0.158205	0.291505	0.251436	0.178797	0.143396	0.126728
XELAEV18028961M	0.393741	0.38902	0.227687	0.279907	0.173623	0.376396	0.338676	0.359803	0.264608	0.242357	0.385068	0.363848	0.293745	0.272258	0.20799
XELAEV18029462M	0.425652	0.324555	0.263534	0.263345	0.136335	0.319254	0.30933	0.261957	0.228173	0.0872704	0.372453	0.316942	0.262745	0.245759	0.111803
XELAEV18030614M	0.49701	0.501948	0.329423	0.330949	0.212157	0.448805	0.407902	0.402973	0.345333	0.405964	0.472908	0.454925	0.366198	0.338141	0.30906
XELAEV18030771M	0.365746	0.323962	0.275184	0.202343	0.0914987	0.368775	0.313282	0.23083	0.204935	0.186391	0.36726	0.318622	0.253007	0.203639	0.138945
XELAEV18030915M	0.439586	0.419705	0.284151	0.205877	0.240426	0.374558	0.298361	0.247858	0.265069	0.162079	0.407072	0.359033	0.266005	0.235473	0.201253
XELAEV18031398M	0.475944	0.400453	0.14849	0.153533	0.0912893	0.304499	0.316585	0.164707	0.19057	0.199916	0.390221	0.358519	0.156599	0.172052	0.145602
XELAEV18031557M	0.229832	0.52259	0.238534	0.394436	0.218928	0.410019	0.334456	0.411619	0.2066	0.205563	0.319925	0.428523	0.325077	0.300518	0.212245
XELAEV18031809M	0.354451	0.357711	0.285867	0.309697	0.170447	0.348133	0.282541	0.309237	0.256328	0.20755	0.351292	0.320126	0.297552	0.283012	0.188998
XELAEV18031845M	0.469476	0.419209	0.293897	0.239185	0.248887	0.332984	0.306979	0.236092	0.248422	0.315823	0.40123	0.363094	0.264994	0.243804	0.282355
XELAEV18031863M	0.364836	0.302707	0.175601	0.208441	0.155233	0.373727	0.294434	0.255519	0.211108	0.18035	0.369281	0.29857	0.21556	0.209774	0.167792
XELAEV18032263M	0.330088	0.294087	0.261881	0.204335	0.176265	0.312312	0.294381	0.203425	0.208673	0.149141	0.3212	0.294234	0.232653	0.206504	0.162703
XELAEV18032348M	0.442911	0.290885	0.26493	0.260829	0.112834	0.450546	0.408553	0.449236	0.342026	0.235885	0.446729	0.349719	0.357083	0.301428	0.174359
XELAEV18032666M	0.345652	0.279472	0.150601	0.196681	0.141259	0.354146	0.368075	0.290738	0.212341	0.161242	0.349899	0.323773	0.22067	0.204511	0.151251
XELAEV18033008M	0.389823	0.36453	0.25843	0.233551	0.216306	0.351387	0.363448	0.262698	0.339487	0.220474	0.370605	0.363989	0.260564	0.286519	0.21839
XELAEV18033087M	0.338441	0.320602	0.268842	0.154873	0.17558	0.350261	0.289181	0.273119	0.235108	0.162133	0.344351	0.304891	0.270981	0.194991	0.168857
XELAEV18033153M	0.385926	0.277912	0.327335	0.200573	0.185979	0.324923	0.334385	0.364529	0.318218	0.218828	0.355425	0.306148	0.345932	0.259395	0.202404
XELAEV18033607M	0.410855	0.319121	0.294176	0.184869	0.226518	0.353121	0.325819	0.270189	0.273809	0.21792	0.381988	0.32247	0.282182	0.229339	0.222219
XELAEV18033706M	0.349861	0.23153	0.390224	0.239598	0.118778	0.277173	0.320903	0.210312	0.196831	0.159053	0.313517	0.276216	0.300268	0.218214	0.138916
XELAEV18033707M	0.438246	0.219301	0.15918	0.213004	0.216134	0.353365	0.346243	0.32203	0.282387	0.136293	0.395805	0.282772	0.240605	0.247696	0.176214
XELAEV18033719M	0.290656	0.283846	0.177209	0.12241	0.159822	0.283225	0.314399	0.166607	0.154567	0.155749	0.286941	0.299122	0.171908	0.138489	0.157786
XELAEV18034218M	0.398565	0.36656	0.165492	0.184131	0.126346	0.410675	0.378214	0.461194	0.42233	0.228402	0.40462	0.372387	0.313343	0.30323	0.177374
XELAEV18035585M	0.345451	0.462204	0.221981	0.223293	0.280377	0.359746	0.284878	0.192605	0.23096	0.103887	0.352598	0.373541	0.207293	0.227127	0.192132
XELAEV18035769M	0.428893	0.368132	0.230775	0.173522	0.161878	0.420921	0.345784	0.320242	0.26881	0.236111	0.424907	0.356958	0.275509	0.221166	0.198994
XELAEV18035949M	0.32983	0.360721	0.206854	0.263694	0.150174	0.348058	0.36455	0.325689	0.242189	0.174668	0.338944	0.362636	0.266271	0.252942	0.162421
XELAEV18036351M	0.363893	0.397279	0.346663	0.316412	0.17252	0.357526	0.352676	0.238216	0.204443	0.144237	0.360709	0.374977	0.29244	0.260427	0.158378
XELAEV18036927M	0.32572	0.215305	0.213911	0.15587	0.142613	0.335827	0.302509	0.197545	0.20716	0.159349	0.330773	0.258907	0.205728	0.181515	0.150981
XELAEV18037039M	0.283228	0.409648	0.276966	0.143397	0.164143	0.235312	0.332377	0.343198	0.20096	0.118701	0.25927	0.371012	0.310082	0.172178	0.141422
XELAEV18037215M	0.437809	0.332471	0.232177	0.240216	0.202703	0.294495	0.377132	0.222453	0.235188	0.202513	0.366152	0.354801	0.227315	0.237702	0.202608
XELAEV18037282M	0.254829	0.369425	0.197469	0.164218	0.315154	0.428808	0.383147	0.308721	0.267031	0.23977	0.341819	0.376286	0.253095	0.215625	0.277462
XELAEV18037587M	0.419109	0.45036	0.250645	0.240127	0.187883	0.511464	0.429569	0.375672	0.337269	0.264922	0.465286	0.439964	0.313159	0.288698	0.226403
XELAEV18037699M	0.487377	0.308311	0.33842	0.138411	0.226432	0.41096	0.394997	0.333915	0.405445	0.270624	0.449169	0.351654	0.336167	0.271928	0.248528
XELAEV18037717M	0.506011	0.312301	0.273392	0.372753	0.217965	0.435979	0.372594	0.390363	0.33112	0.254795	0.470995	0.342448	0.331878	0.351937	0.23638
XELAEV18037790M	0.441558	0.511825	0.288092	0.292254	0.3648	0.345042	0.403626	0.311513	0.315246	0.237039	0.3933	0.457725	0.299803	0.30375	0.30092
XELAEV18037800M	0.429991	0.318777	0.368876	0.130168	0.156163	0.416412	0.390214	0.354056	0.306135	0.230361	0.423202	0.354496	0.361466	0.218152	0.193262
XELAEV18037941M	0.494088	0.48986	0.364569	0.221994	0.257171	0.490448	0.408135	0.518273	0.457183	0.317476	0.492268	0.448998	0.441421	0.339589	0.287324
XELAEV18038074M	0.352001	0.288782	0.266981	0.215684	0.160667	0.348558	0.354676	0.229214	0.322004	0.175476	0.35028	0.321729	0.248098	0.268844	0.168071
XELAEV18038454M	0.462529	0.316413	0.303232	0.257702	0.209066	0.348133	0.364958	0.255334	0.335207	0.255047	0.405331	0.340685	0.279283	0.296454	0.232056
XELAEV18038459M	0.528074	0.484629	0.443413	0.430957	0.183168	0.45363	0.392521	0.220889	0.295818	0.269762	0.490852	0.438575	0.332151	0.363388	0.226465
XELAEV18038885M	0.344307	0.289851	0.296276	0.145751	0.126882	0.351956	0.344369	0.34115	0.310889	0.241908	0.348132	0.31711	0.318713	0.22832	0.184395
XELAEV18039099M	0.315649	0.25075	0.281249	0.172228	0.147748	0.369704	0.314628	0.284527	0.219349	0.205761	0.342676	0.282689	0.282888	0.195788	0.176755
XELAEV18039350M	0.268563	0.213244	0.241998	0.114916	0.23079	0.464522	0.366697	0.237775	0.289964	0.171991	0.366543	0.28997	0.239887	0.20244	0.201391
XELAEV18039744M	0.344143	0.247269	0.237599	0.194666	0.170353	0.340467	0.314666	0.218843	0.234048	0.180511	0.342305	0.280967	0.228221	0.214357	0.175432
XELAEV18040111M	0.284451	0.386893	0.23	0.119315	0.115979	0.252092	0.295507	0.146702	0.190376	0.11544	0.268271	0.3412	0.188351	0.154846	0.11571
XELAEV18040907M	0.562432	0.471423	0.442175	0.40044	0.300307	0.406831	0.36745	0.460408	0.250595	0.357193	0.484632	0.419436	0.451291	0.325517	0.32875
XELAEV18041032M	0.411515	0.460015	0.247167	0.268946	0.270009	0.375883	0.37228	0.363817	0.308499	0.161983	0.393699	0.416147	0.305492	0.288723	0.215996
XELAEV18041589M	0.356583	0.268343	0.221883	0.28567	0.17082	0.357234	0.261664	0.251836	0.199102	0.136445	0.356908	0.265004	0.23686	0.242386	0.153633
XELAEV18041625M	0.407581	0.388357	0.18825	0.168881	0.214697	0.308714	0.302289	0.276061	0.271788	0.176384	0.358147	0.345323	0.232155	0.220335	0.195541
XELAEV18041792M	0.431052	0.322303	0.325249	0.318075	0.198216	0.335879	0.269514	0.278911	0.217839	0.167698	0.383466	0.295908	0.30208	0.267957	0.182957
XELAEV18042328M	0.368881	0.369166	0.308807	0.264617	0.241047	0.376111	0.324331	0.216064	0.320852	0.189188	0.372496	0.346748	0.262436	0.292734	0.215118
XELAEV18042878M	0.444685	0.452574	0.196155	0.158627	0.228327	0.405771	0.310784	0.368701	0.348114	0.202819	0.425228	0.381679	0.282428	0.25337	0.215573
XELAEV18043110M	0.390604	0.386553	0.239513	0.360271	0.22376	0.354602	0.302638	0.311498	0.194818	0.187787	0.372603	0.344596	0.275505	0.277544	0.205774
XELAEV18043517M	0.312457	0.122415	0.239513	0.188904	0.142385	0.295664	0.29835	0.209889	0.209979	0.144177	0.304061	0.210382	0.224701	0.199442	0.143281
XELAEV18043527M	0.417583	0.474782	0.367202	0.189938	0.180619	0.477828	0.366844	0.432175	0.420121	0.294037	0.447705	0.420813	0.399688	0.30503	0.237328
XELAEV18043550M	0.404257	0.344396	0.20693	0.120898	0.202062	0.382167	0.37976	0.187451	0.243562	0.124361	0.393212	0.362078	0.19719	0.18223	0.163211
XELAEV18043840M	0.405026	0.402351	0.237875	0.176999	0.24473	0.433033	0.404517	0.3626	0.337648	0.257185	0.419029	0.403434	0.300237	0.257324	0.250957
XELAEV18044055M	0.483585	0.347481	0.237214	0.222089	0.226646	0.342105	0.344036	0.372319	0.293409	0.264728	0.412845	0.345759	0.304767	0.257749	0.245687
XELAEV18044113M	0.624325	0.439625	0.238867	0.244578	0.238848	0.599694	0.530749	0.382165	0.451582	0.30156	0.61201	0.485187	0.310516	0.34808	0.270204
XELAEV18044260M	0.351139	0.322224	0.310423	0.281891	0.219096	0.330792	0.266106	0.279187	0.153866	0.122505	0.340965	0.294165	0.294805	0.217878	0.170801
XELAEV18044306M	0.447211	0.446451	0.25952	0.244145	0.194141	0.407024	0.32302	0.284826	0.242295	0.140792	0.427117	0.384735	0.272173	0.24322	0.167467
XELAEV18045052M	0.309103	0.346673	0.259296	0.286198	0.153927	0.394183	0.291492	0.251455	0.19797	0.154897	0.351643	0.319082	0.255375	0.242084	0.154412
XELAEV18045415M	0.441945	0.336943	0.258494	0.196519	0.0897464	0.53509	0.337082	0.432124	0.387293	0.279928	0.488518	0.337013	0.345309	0.291906	0.184837
XELAEV18045525M	0.402408	0.561233	0.270358	0.184053	0.354586	0.331451	0.348432	0.29653	0.205605	0.180875	0.366929	0.454833	0.283444	0.194829	0.26773
XELAEV18045835M	0.421597	0.389294	0.353438	0.250627	0.145788	0.361406	0.328798	0.280044	0.294561	0.296481	0.391501	0.359046	0.316741	0.272594	0.221134
XELAEV18046228M	0.343289	0.365267	0.283244	0.31099	0.363444	0.469979	0.360652	0.264593	0.228024	0.122506	0.406634	0.362959	0.273919	0.269507	0.242975
XELAEV18046236M	0.471461	0.364708	0.267885	0.319398	0.22864	0.401565	0.332227	0.384217	0.354837	0.306568	0.436513	0.348467	0.326051	0.337117	0.267604
XELAEV18046267M	0.415054	0.319901	0.250142	0.225029	0.197649	0.374281	0.344554	0.246828	0.21189	0.191013	0.394668	0.332227	0.248485	0.218459	0.194331
XELAEV18046282M	0.306801	0.250806	0.155522	0.159869	0.142839	0.334159	0.272916	0.275031	0.217895	0.178586	0.32048	0.261861	0.215277	0.188882	0.160712
XELAEV18046454M	0.388404	0.370226	0.288128	0.211098	0.177234	0.380358	0.371168	0.324524	0.364371	0.284207	0.384381	0.370697	0.306326	0.287735	0.230721
XELAEV18046746M	0.408491	0.504878	0.30768	0.229958	0.268128	0.502388	0.42968	0.237109	0.264996	0.248239	0.45544	0.467279	0.272395	0.247477	0.258184
XELAEV18046980M	0.328265	0.240013	0.17786	0.308363	0.159141	0.351232	0.331542	0.263224	0.201206	0.173931	0.339749	0.285777	0.220542	0.254784	0.166536
XELAEV18047185M	0.529069	0.326428	0.192949	0.357442	0.214844	0.277593	0.285098	0.258676	0.162243	0.128365	0.403331	0.305763	0.225813	0.259842	0.171604
XELAEV18047360M	0.363387	0.184595	0.194108	0.214679	0.208101	0.356043	0.339065	0.343405	0.221968	0.198189	0.359715	0.26183	0.268756	0.218324	0.203145
XELAEV18047430M	0.319705	0.294564	0.228449	0.175757	0.159011	0.336255	0.277715	0.268352	0.273082	0.185802	0.32798	0.286139	0.2484	0.22442	0.172407
XELAEV18047520M	0.453228	0.635176	0.414061	0.267098	0.549475	0.462704	0.368402	0.386704	0.364898	0.214633	0.457966	0.501789	0.400383	0.315998	0.382054
XETROV90000674M.S	0.372841	0.373555	0.275894	0.234017	0.199116	0.334145	0.261301	0.290491	0.206274	0.163803	0.353493	0.317428	0.283192	0.220145	0.18146
XETROV90001378M.S	0.443128	0.473385	0.311694	0.24075	0.142085	0.507884	0.452469	0.527926	0.457698	0.314689	0.475506	0.462927	0.41981	0.349224	0.228387
XETROV90003130M.L	0.333125	0.26098	0.283297	0.151726	0.143263	0.369149	0.299255	0.274098	0.348696	0.211197	0.351137	0.280117	0.278697	0.250211	0.17723
XETROV90003504M.S	0.263112	0.315948	0.249766	0.199489	0.183864	0.380226	0.382141	0.250343	0.291416	0.210898	0.321669	0.349045	0.250055	0.245453	0.197381
XETROV90003833M.L	0.37242	0.323792	0.23914	0.171738	0.13912	0.301168	0.254363	0.211163	0.230228	0.20113	0.336794	0.289078	0.225152	0.200983	0.170125
XETROV90006970M.S	0.353205	0.335651	0.237813	0.240298	0.126712	0.235427	0.247187	0.157339	0.184678	0.152998	0.294316	0.291419	0.197576	0.212488	0.139855
XETROV90007767M.L	0.404033	0.412258	0.316837	0.222482	0.223622	0.426824	0.376068	0.405831	0.333474	0.260628	0.415428	0.394163	0.361334	0.277978	0.242125
XETROV90013213M.L	0.435732	0.386999	0.233377	0.288312	0.24444	0.485616	0.368313	0.36241	0.31361	0.212709	0.460674	0.377656	0.297893	0.300961	0.228574
XETROV90013561M.L	0.338166	0.277608	0.345626	0.191061	0.173121	0.309773	0.39507	0.255699	0.173108	0.209252	0.32397	0.336339	0.300663	0.182085	0.191186
XETROV90016704M.L	0.298228	0.313285	0.204021	0.158783	0.101294	0.336257	0.385385	0.358996	0.274438	0.215487	0.317243	0.349335	0.281508	0.216611	0.15839
XETROV90017319M.L	0.372369	0.310088	0.175092	0.175543	0.264031	0.323368	0.273284	0.235913	0.213653	0.153475	0.347868	0.291686	0.205503	0.194598	0.208753
XETROV90018342M.L	0.577218	0.359751	0.398369	0.187477	0.128695	0.558056	0.427299	0.516185	0.450016	0.284945	0.567637	0.393525	0.457277	0.318747	0.20682
XETROV90020434M.L	0.47893	0.458263	0.375348	0.235414	0.295022	0.381138	0.400989	0.388525	0.329624	0.238927	0.430034	0.429626	0.381937	0.282519	0.266974
XETROV90020434M.S	0.490918	0.283889	0.206499	0.21446	0.205037	0.307836	0.308456	0.269373	0.222312	0.231635	0.399377	0.296172	0.237936	0.218386	0.218336
XETROV90021881M.L	0.263219	0.32599	0.112934	0.113531	0.14143	0.301032	0.301944	0.192249	0.235694	0.163967	0.282125	0.313967	0.152591	0.174612	0.152698
XETROV90025579M.L	0.330613	0.218792	0.202723	0.190125	0.117866	0.421398	0.323269	0.201176	0.31215	0.170154	0.376005	0.27103	0.20195	0.251138	0.14401
XETROV90026291M.L	0.436246	0.338989	0.115051	0.0866773	0.116756	0.530383	0.507076	0.368977	0.26928	0.239203	0.483315	0.423033	0.242014	0.177979	0.17798
XETROV90029311M.S	0.510457	0.354846	0.230122	0.168047	0.203905	0.439379	0.459172	0.314057	0.348562	0.228595	0.474918	0.407009	0.27209	0.258304	0.21625
XRCC5.L	0.31899	0.617976	0.356214	0.205002	0.153064	0.422894	0.339058	0.241878	0.27545	0.252814	0.370942	0.478517	0.299046	0.240226	0.202939
YAE1D1.L	0.388711	0.413955	0.206665	0.146646	0.182136	0.309502	0.329384	0.247523	0.288189	0.249103	0.349107	0.37167	0.227094	0.217417	0.215619
YIF1B.L	0.408462	0.471291	0.342689	0.284238	0.147159	0.343956	0.297903	0.272374	0.199712	0.272328	0.376209	0.384597	0.307532	0.241975	0.209744
YWHAB.S	0.391274	0.377031	0.226547	0.244058	0.197615	0.382527	0.343824	0.294807	0.321228	0.271953	0.3869	0.360427	0.260677	0.282643	0.234784
ZBTB11.S	0.24661	0.319814	0.228121	0.137081	0.0942985	0.289139	0.32319	0.27481	0.296968	0.164232	0.267874	0.321502	0.251466	0.217024	0.129265
ZBTB8B.S	0.400939	0.297961	0.265435	0.228072	0.204766	0.294058	0.282826	0.287655	0.177436	0.181731	0.347499	0.290393	0.276545	0.202754	0.193249
ZC3H7B.L	0.319909	0.202502	0.214951	0.143412	0.155573	0.34798	0.318828	0.192139	0.193439	0.124929	0.333945	0.260665	0.203545	0.168425	0.140251
ZDHHC15.L	0.384426	0.31424	0.276033	0.257722	0.193411	0.390463	0.338515	0.250507	0.278708	0.226771	0.387444	0.326377	0.26327	0.268215	0.210091
ZFAND3.L	0.504659	0.475775	0.285977	0.28134	0.244565	0.44743	0.404024	0.350571	0.404374	0.278467	0.476044	0.4399	0.318274	0.342857	0.261516
ZFP36L2.L	0.578961	0.460404	0.326854	0.348933	0.355318	0.493843	0.393977	0.437401	0.416614	0.337993	0.536402	0.427191	0.382128	0.382773	0.346656
ZFP91.S	0.349195	0.278824	0.248957	0.151146	0.143953	0.319767	0.253653	0.250896	0.262093	0.199391	0.334481	0.266238	0.249926	0.20662	0.171672
ZMYM4.S	0.443267	0.318414	0.291155	0.24301	0.176912	0.343159	0.28002	0.224373	0.27956	0.254963	0.393213	0.299217	0.257764	0.261285	0.215937
ZNF507.L	0.400033	0.339696	0.4509	0.23136	0.219952	0.323856	0.321073	0.26635	0.239287	0.163729	0.361944	0.330384	0.358625	0.235323	0.19184
ZNF652.L	0.431518	0.308866	0.228719	0.267132	0.209466	0.31985	0.344685	0.252327	0.260947	0.232817	0.375684	0.326775	0.240523	0.264039	0.221142
ZNF830.S	0.323464	0.215902	0.252459	0.321299	0.15028	0.468018	0.459275	0.364585	0.230691	0.289971	0.395741	0.337589	0.308522	0.275995	0.220125
ZP4.S	0.392097	0.486782	0.248046	0.158087	0.383486	0.2882	0.290764	0.259001	0.205603	0.114301	0.340148	0.388773	0.253524	0.181845	0.248894
ZYG11B.S	0.293433	0.288184	0.218633	0.0925999	0.271046	0.288046	0.316283	0.215714	0.189945	0.174136	0.290739	0.302233	0.217174	0.141272	0.222591
ZZZ3-LIKE.S	0.358714	0.274466	0.261091	0.229084	0.177476	0.32455	0.321536	0.238538	0.206336	0.170976	0.341632	0.298001	0.249814	0.21771	0.174226

## Sheet: Ribosome Translation
Human Uniprot Accession #	Gene Description
Q9BX40	LSM family member 14B(LSM14B)
O95478	NSA2, ribosome biogenesis homolog(NSA2)
Q07352	ZFP36 ring finger protein like 1(ZFP36L1)
Q9NZE8	mitochondrial ribosomal protein L35(MRPL35)
O15235	mitochondrial ribosomal protein S12(MRPS12)
P82930	mitochondrial ribosomal protein S34(MRPS34)
Q96HR8	nuclear assembly factor 1 ribonucleoprotein(NAF1)
Q9UQ80	proliferation-associated 2G4(PA2G4)
P62906	ribosomal protein L10a(RPL10A)
P62913	ribosomal protein L11(RPL11)
P50914	ribosomal protein L14(RPL14)
P18621	ribosomal protein L17(RPL17)
Q02543	ribosomal protein L18a(RPL18A)
P84098	ribosomal protein L19(RPL19)
P46778	ribosomal protein L21(RPL21)
P35268	ribosomal protein L22(RPL22)
P62829	ribosomal protein L23(RPL23)
P62750	ribosomal protein L23a(RPL23A)
P83731	ribosomal protein L24(RPL24)
P61353	ribosomal protein L27(RPL27)
P46779	ribosomal protein L28(RPL28)
P47914	ribosomal protein L29(RPL29)
P62899	ribosomal protein L31(RPL31)
P42766	ribosomal protein L35(RPL35)
Q9Y3U8	ribosomal protein L36(RPL36)
P61927	ribosomal protein L37(RPL37)
P61513	ribosomal protein L37a(RPL37A)
P63173	ribosomal protein L38(RPL38)
P46777	ribosomal protein L5(RPL5)
P46783	ribosomal protein S10(RPS10)
P62277	ribosomal protein S13(RPS13)
P62263	ribosomal protein S14(RPS14)
Q86WX3	ribosomal protein S19 binding protein 1(RPS19BP1)
P39019	ribosomal protein S19(RPS19)
P15880	ribosomal protein S2(RPS2)
P61247	ribosomal protein S3A(RPS3A)
P62241	ribosomal protein S8(RPS8)
P05386	ribosomal protein lateral stalk subunit P1(RPLP1)
P05387	ribosomal protein lateral stalk subunit P2(RPLP2)

## Sheet: Cel-Cell Adhesion
Human Uniprot Accession #	Gene Description
Q9UHR4	BAI1 associated protein 2 like 1(BAIAP2L1)
P26196	DEAD-box helicase 6(DDX6)
Q15907	RAB11B, member RAS oncogene family(RAB11B)
Q9Y265	RuvB like AAA ATPase 1(RUVBL1)
Q8NC51	SERPINE1 mRNA binding protein 1(SERBP1)
Q99961	SH3 domain containing GRB2 like 1, endophilin A2(SH3GL1)
Q9Y371	SH3 domain containing GRB2 like endophilin B1(SH3GLB1)
O15105	SMAD family member 7(SMAD7)
Q9BXI6	TBC1 domain family member 10A(TBC1D10A)
O95292	VAMP associated protein B and C(VAPB)
O95433	activator of Hsp90 ATPase activity 1(AHSA1)
P20810	calpastatin(CAST)
P50990	chaperonin containing TCP1 subunit 8(CCT8)
Q9UQN3	charged multivesicular body protein 2B(CHMP2B)
O00299	chloride intracellular channel 1(CLIC1)
Q14118	dystroglycan 1(DAG1)
P06733	enolase 1(ENO1)
P26641	eukaryotic translation elongation factor 1 gamma(EEF1G)
P13639	eukaryotic translation elongation factor 2(EEF2)
P41091	eukaryotic translation initiation factor 2 subunit gamma(EIF2S3)
Q08379	golgin A2(GOLGA2)
P11021	heat shock protein family A (Hsp70) member 5(HSPA5)
Q9Y266	nuclear distribution C, dynein complex regulator(NUDC)
P22234	phosphoribosylaminoimidazole carboxylase; phosphoribosylaminoimidazolesuccinocarboxamide synthase(PAICS)
Q9NQC3	reticulon 4(RTN4)
P50914	ribosomal protein L14(RPL14)
P62750	ribosomal protein L23a(RPL23A)
P83731	ribosomal protein L24(RPL24)
P47914	ribosomal protein L29(RPL29)
P15880	ribosomal protein S2(RPS2)
Q15208	serine/threonine kinase 38(STK38)
Q13596	sorting nexin 1(SNX1)
P31946	tyrosine 3-monooxygenase/tryptophan 5-monooxygenase activation protein beta(YWHAB)
O14562	ubiquitin family domain containing 1(UBFD1)

## Sheet: Mitochondria
Human Uniprot Accession #	Gene Description
P48047	ATP synthase, H+ transporting, mitochondrial F1 complex, O subunit(ATP5O)
P24539	ATP synthase, H+ transporting, mitochondrial Fo complex subunit B1(ATP5F1)
P18859	ATP synthase, H+ transporting, mitochondrial Fo complex subunit F6(ATP5J)
Q07820	BCL2 family apoptosis regulator(MCL1)
Q8TAA5	GrpE like 2, mitochondrial(GRPEL2)
Q9UI09	NADH:ubiquinone oxidoreductase subunit A12(NDUFA12)
O95167	NADH:ubiquinone oxidoreductase subunit A3(NDUFA3)
Q16718	NADH:ubiquinone oxidoreductase subunit A5(NDUFA5)
O95168	NADH:ubiquinone oxidoreductase subunit B4(NDUFB4)
O43674	NADH:ubiquinone oxidoreductase subunit B5(NDUFB5)
Q15070	OXA1L, mitochondrial inner membrane protein(OXA1L)
Q9Y371	SH3 domain containing GRB2 like endophilin B1(SH3GLB1)
Q9NQZ5	StAR related lipid transfer domain containing 7(STARD7)
O43715	TP53 regulated inhibitor of apoptosis 1(TRIAP1)
Q562E7	WD repeat domain 81(WDR81)
P15336	activating transcription factor 2(ATF2)
Q9H3P7	acyl-CoA binding domain containing 3(ACBD3)
Q9BUR5	apolipoprotein O(APOO)
Q96IL0	apoptogenic 1, mitochondrial(APOPT1)
O95831	apoptosis inducing factor, mitochondria associated 1(AIFM1)
Q9NX63	coiled-coil-helix-coiled-coil-helix domain containing 3(CHCHD3)
Q8N4Q1	coiled-coil-helix-coiled-coil-helix domain containing 4(CHCHD4)
P06493	cyclin dependent kinase 1(CDK1)
P20674	cytochrome c oxidase subunit 5A(COX5A)
P10606	cytochrome c oxidase subunit 5B(COX5B)
P14854	cytochrome c oxidase subunit 6B1(COX6B1)
P14406	cytochrome c oxidase subunit 7A2(COX7A2)
Q9BQ52	elaC ribonuclease Z 2(ELAC2)
P38117	electron transfer flavoprotein beta subunit(ETFB)
P30084	enoyl-CoA hydratase, short chain 1(ECHS1)
Q86SX6	glutaredoxin 5(GLRX5)
Q16836	hydroxyacyl-CoA dehydrogenase(HADH)
Q2VYF4	leucine zipper and EF-hand containing transmembrane protein 2(LETM2)
Q15046	lysyl-tRNA synthetase(KARS)
Q96PE7	methylmalonyl-CoA epimerase(MCEE)
Q9NQG6	mitochondrial elongation factor 1(MIEF1)
Q15390	mitochondrial fission regulator 1(MTFR1)
Q9NZE8	mitochondrial ribosomal protein L35(MRPL35)
O15235	mitochondrial ribosomal protein S12(MRPS12)
P82930	mitochondrial ribosomal protein S34(MRPS34)
Q9H2K0	mitochondrial translational initiation factor 3(MTIF3)
Q7L4E1	mitoguardin 2(MIGA2)
P30048	peroxiredoxin 3(PRDX3)
Q9UHV9	prefoldin subunit 2(PFDN2)
Q9NQP4	prefoldin subunit 4(PFDN4)
Q9H9B4	sideroflexin 1(SFXN1)
Q00325	solute carrier family 25 member 3(SLC25A3)
Q6J4K2	solute carrier family 8 member B1(SLC8B1)
P57105	synaptojanin 2 binding protein(SYNJ2BP)
Q7L0Y3	tRNA methyltransferase 10C, mitochondrial RNase P subunit(TRMT10C)
Q99536	vesicle amine transport 1(VAT1)
