# Supplementary material
Source: HighWire-hosted journal article supplement (doi:10.1101/rna.073247.119)
Supplement: Supplemental_Table_S8.xlsx [file Supplemental_Table_S8.xlsx]

## Sheet: Translation Increase 1
gene	noPGpolyper.x	PG90polyper.x	MIpolyper.x	Intpolyper.x	MIIpolyper.x	noPGpolyper.y	PG90polyper.y	MIpolyper.y	Intpolyper.y	MIIpolyper.y	noPGAvg	PG90Avg	MIAvg	IntAvg	MIIAvg
ABAT.L	0.412756	0.662539	0.718631	0.801166	0.669799	0.580273	0.48766	0.59981	0.625331	0.699304	0.496514	0.5751	0.65922	0.713249	0.684551
ACRC.L	0.445333	0.59674	0.649506	0.635086	0.547644	0.415178	0.418805	0.635612	0.57872	0.549313	0.430255	0.507772	0.642559	0.606903	0.548479
AHCTF1.L	0.213189	0.273882	0.308073	0.367777	0.350903	0.23607	0.298829	0.366324	0.400834	0.459499	0.22463	0.286355	0.337198	0.384305	0.405201
AHCTF1.S	0.198205	0.23322	0.300615	0.299785	0.256716	0.240038	0.323701	0.402707	0.436102	0.511834	0.219121	0.27846	0.351661	0.367944	0.384275
AKAP9.S	0.247363	0.280155	0.368086	0.338652	0.331103	0.370012	0.427169	0.487695	0.53389	0.617571	0.308687	0.353662	0.42789	0.436271	0.474337
ANLN-LIKE.1.L	0.492211	0.548538	0.597251	0.660519	0.577071	0.392254	0.442924	0.649553	0.63923	0.746393	0.442233	0.495731	0.623402	0.649874	0.661732
ANP32C.L	0.37815	0.35354	0.48121	0.597189	0.562322	0.341697	0.321833	0.491822	0.54646	0.756893	0.359924	0.337687	0.486516	0.571824	0.659608
ANP32C.S	0.469432	0.418337	0.543198	0.59808	0.601028	0.403432	0.396414	0.536155	0.612226	0.704949	0.436432	0.407375	0.539676	0.605153	0.652988
ARL6IP1.L	0.414485	0.506523	0.650338	0.521432	0.466708	0.280853	0.341552	0.479368	0.439959	0.457449	0.347669	0.424037	0.564853	0.480695	0.462079
ASRGL1.L	0.421513	0.494419	0.496675	0.596419	0.423169	0.249825	0.477032	0.584897	0.621841	0.613106	0.335669	0.485726	0.540786	0.60913	0.518137
ATAT1.S	0.181146	0.40678	0.342134	0.404981	0.324626	0.339012	0.301208	0.450711	0.593077	0.722941	0.260079	0.353994	0.396422	0.499029	0.523784
ATF7IP-LIKE.S	0.290135	0.345099	0.381332	0.315269	0.301598	0.325841	0.338301	0.54361	0.517463	0.600893	0.307988	0.3417	0.462471	0.416366	0.451246
ATF7IP2.L	0.195718	0.159336	0.277052	0.379592	0.379241	0.26462	0.262385	0.271428	0.261749	0.422213	0.230169	0.210861	0.27424	0.320671	0.400727
BAMBI.L	0.441181	0.427178	0.574952	0.804887	0.673322	0.31118	0.383701	0.396734	0.431722	0.675996	0.37618	0.40544	0.485843	0.618305	0.674659
BSG.L	0.407286	0.558477	0.718652	0.69208	0.570298	0.258349	0.436652	0.447366	0.511264	0.407979	0.332817	0.497564	0.583009	0.601672	0.489139
C4ORF47.L	0.331787	0.446281	0.583119	0.438037	0.201495	0.336235	0.330625	0.593159	0.559963	0.60349	0.334011	0.388453	0.588139	0.499	0.402493
CALHM2.S	0.362287	0.318055	0.532194	0.631357	0.686024	0.24968	0.220656	0.207079	0.195446	0.314225	0.305984	0.269356	0.369636	0.413402	0.500125
CASC5.S	0.272533	0.370016	0.375023	0.394646	0.454091	0.246078	0.33063	0.29428	0.310536	0.496554	0.259305	0.350323	0.334651	0.352591	0.475322
CBX3.L	0.421876	0.492876	0.558793	0.571487	0.44466	0.359664	0.427679	0.620156	0.592871	0.644938	0.39077	0.460278	0.589475	0.582179	0.544799
CCDC50.L	0.244222	0.19882	0.242557	0.36412	0.331159	0.261436	0.265827	0.311396	0.304509	0.494228	0.252829	0.232324	0.276976	0.334315	0.412693
CCDC59.L	0.29991	0.273066	0.339323	0.328278	0.324584	0.371227	0.384274	0.497464	0.573416	0.680817	0.335569	0.32867	0.418393	0.450847	0.502701
CCDC94.L	0.341432	0.529072	0.508957	0.52973	0.371421	0.343051	0.443279	0.639245	0.624181	0.657289	0.342241	0.486175	0.574101	0.576956	0.514355
CCNB1.2.S	0.274614	0.257459	0.385216	0.579074	0.437462	0.250113	0.242448	0.280944	0.37823	0.68118	0.262363	0.249954	0.33308	0.478652	0.559321
CD9.S	0.481988	0.544087	0.616527	0.647638	0.568749	0.372297	0.345019	0.641092	0.624545	0.486441	0.427143	0.444553	0.62881	0.636092	0.527595
CDC40.L	0.290429	0.284117	0.385767	0.511293	0.377331	0.270411	0.289312	0.50081	0.429651	0.510934	0.28042	0.286714	0.443289	0.470472	0.444133
CDC40.S	0.29859	0.258698	0.379799	0.439133	0.550974	0.257987	0.279646	0.379554	0.344327	0.520689	0.278288	0.269172	0.379676	0.39173	0.535831
CDCA8.L	0.275392	0.246728	0.472611	0.43072	0.491133	0.199356	0.186554	0.315386	0.346287	0.455511	0.237374	0.216641	0.393999	0.388503	0.473322
CENPE-LIKE.L	0.260617	0.32363	0.404071	0.393273	0.348468	0.323711	0.390538	0.47069	0.494954	0.556375	0.292164	0.357084	0.43738	0.444114	0.452421
CEP120.L	0.242134	0.325105	0.424382	0.437483	0.397144	0.340963	0.387023	0.503556	0.62025	0.653821	0.291549	0.356064	0.463969	0.528866	0.525482
CEP152-LIKE.L	0.283066	0.312148	0.444901	0.476122	0.468859	0.301981	0.349088	0.57541	0.574551	0.68599	0.292523	0.330618	0.510156	0.525336	0.577425
CEP152-LIKE.S	0.251351	0.351693	0.455281	0.4737	0.458141	0.334418	0.386421	0.566452	0.577765	0.711139	0.292885	0.369057	0.510867	0.525733	0.58464
CEP55-LIKE.L	0.373993	0.5346	0.681351	0.655444	0.618384	0.408581	0.519184	0.694961	0.72565	0.788584	0.391287	0.526892	0.688156	0.690547	0.703484
CEP57L1.L	0.257497	0.225796	0.460335	0.46087	0.357471	0.263727	0.266221	0.338319	0.343355	0.564383	0.260612	0.246008	0.399327	0.402112	0.460927
CEP76.L	0.252041	0.194891	0.226467	0.563336	0.422296	0.233921	0.273599	0.426239	0.360875	0.603648	0.242981	0.234245	0.326353	0.462105	0.512972
CEP85.L	0.319439	0.379986	0.45762	0.516447	0.410397	0.381078	0.382457	0.62069	0.635101	0.752582	0.350259	0.381222	0.539155	0.575774	0.581489
CHMP1B.S	0.382383	0.388269	0.51572	0.492425	0.466674	0.42044	0.474411	0.624482	0.637006	0.708145	0.401411	0.43134	0.570101	0.564716	0.587409
CKAP2L-LIKE.S	0.240717	0.2524	0.482781	0.519009	0.438037	0.260151	0.3286	0.485779	0.506636	0.603098	0.250434	0.2905	0.48428	0.512823	0.520567
CLDN6.1.L	0.4948	0.639089	0.730933	0.731007	0.730803	0.316815	0.383699	0.579108	0.640257	0.694938	0.405807	0.511394	0.655021	0.685632	0.712871
CLDN6.1.S	0.529567	0.599676	0.698654	0.738954	0.670753	0.354063	0.393752	0.583847	0.634396	0.686745	0.441815	0.496714	0.64125	0.686675	0.678749
CLDN6.2.L	0.428837	0.444843	0.612805	0.762877	0.744609	0.316905	0.32369	0.391476	0.451437	0.530581	0.372871	0.384267	0.502141	0.607157	0.637595
CLDN6.2.S	0.419296	0.417677	0.6208	0.681075	0.617763	0.311508	0.3681	0.413716	0.551703	0.59851	0.365402	0.392888	0.517258	0.616389	0.608136
CLINT1.L	0.313873	0.414194	0.301901	0.425461	0.413077	0.302154	0.390159	0.489047	0.500182	0.58041	0.308013	0.402177	0.395474	0.462822	0.496744
CLSPN.S	0.330446	0.378868	0.423752	0.429145	0.41487	0.33472	0.377461	0.602838	0.65374	0.70496	0.332583	0.378164	0.513295	0.541442	0.559915
CMSS1.L	0.267573	0.306404	0.373039	0.375155	0.437041	0.326727	0.326771	0.398538	0.439434	0.627342	0.29715	0.316587	0.385789	0.407295	0.532192
CSPP1-LIKE.L	0.271472	0.390774	0.404859	0.436775	0.395991	0.353058	0.360706	0.492996	0.502744	0.573825	0.312265	0.37574	0.448928	0.46976	0.484908
CTSB.L	0.345037	0.389702	0.547928	0.673982	0.669604	0.343084	0.32944	0.266254	0.373094	0.428247	0.344061	0.359571	0.407091	0.523538	0.548925
CTSD.S	0.380904	0.394327	0.432614	0.532319	0.609473	0.302802	0.364557	0.318295	0.363099	0.379705	0.341853	0.379442	0.375455	0.447709	0.494589
CTSV.L	0.572348	0.491356	0.70943	0.770616	0.768906	0.334715	0.313986	0.426535	0.5154	0.667088	0.453532	0.402671	0.567983	0.643008	0.717997
CTSV.S	0.410356	0.370055	0.583527	0.680207	0.662524	0.337028	0.309889	0.403722	0.455137	0.661337	0.373692	0.339972	0.493625	0.567672	0.66193
CUEDC2.S	0.368565	0.354862	0.419644	0.469836	0.424733	0.233284	0.345996	0.402924	0.452435	0.474448	0.300924	0.350429	0.411284	0.461136	0.449591
CWC15.S	0.26905	0.302769	0.623886	0.505389	0.600854	0.318999	0.337888	0.493458	0.447408	0.600609	0.294024	0.320329	0.558672	0.476399	0.600732
CWC25.L	0.267478	0.309664	0.447522	0.555644	0.535267	0.342071	0.353341	0.510684	0.503928	0.740392	0.304774	0.331502	0.479103	0.529786	0.637829
CWC25.S	0.250839	0.248428	0.459266	0.54712	0.476484	0.298001	0.279469	0.456329	0.463555	0.689696	0.27442	0.263949	0.457798	0.505338	0.58309
DDA1.L	0.292696	0.294029	0.420811	0.528744	0.408001	0.357531	0.336791	0.560577	0.542528	0.552356	0.325113	0.31541	0.490694	0.535636	0.480179
DDX46-LIKE.L	0.335833	0.290817	0.467372	0.425854	0.459078	0.397472	0.398867	0.524151	0.555633	0.668906	0.366653	0.344842	0.495761	0.490744	0.563992
DEK.L	0.291757	0.356978	0.487159	0.423114	0.338426	0.3917	0.35896	0.596108	0.51646	0.583586	0.341728	0.357969	0.541634	0.469787	0.461006
DEPDC7.L	0.25109	0.410234	0.419402	0.378204	0.26049	0.342765	0.334611	0.490123	0.616312	0.571612	0.296928	0.372422	0.454762	0.497258	0.416051
DEPDC7.S	0.355893	0.469628	0.422614	0.467379	0.368579	0.34828	0.368175	0.582221	0.660017	0.600073	0.352086	0.418901	0.502418	0.563698	0.484326
DNAJC9.L	0.425846	0.564309	0.645713	0.64816	0.531134	0.510488	0.486846	0.746245	0.739817	0.790891	0.468167	0.525578	0.695979	0.693988	0.661012
DNMT1.L	0.280918	0.458972	0.614152	0.679994	0.617542	0.279073	0.323021	0.645272	0.545173	0.70543	0.279995	0.390997	0.629712	0.612584	0.661486
DNMT1.S	0.304492	0.376041	0.597704	0.662939	0.629555	0.312176	0.339272	0.583223	0.582727	0.721841	0.308334	0.357656	0.590464	0.622833	0.675698
DPPA2/4.1	0.33631	0.332118	0.319244	0.348051	0.323415	0.321858	0.319025	0.459219	0.575468	0.731696	0.329084	0.325572	0.389231	0.461759	0.527556
DRAP1.L	0.362817	0.350968	0.34871	0.393663	0.397713	0.326496	0.336908	0.443752	0.532668	0.645885	0.344657	0.343938	0.396231	0.463165	0.521799
DROSHA.S	0.215968	0.162963	0.40027	0.501724	0.503348	0.291178	0.299892	0.350454	0.395362	0.599651	0.253573	0.231427	0.375362	0.448543	0.551499
DUS4L.L	0.245121	0.193137	0.317807	0.633824	0.744032	0.271043	0.252398	0.335895	0.310107	0.687234	0.258082	0.222768	0.326851	0.471966	0.715633
EIF1AX.L	0.397435	0.366447	0.464147	0.383243	0.291341	0.302981	0.357565	0.539253	0.52689	0.538652	0.350208	0.362006	0.5017	0.455067	0.414997
EMILIN2.L	0.216507	0.273907	0.567205	0.587908	0.393045	0.269482	0.269636	0.305189	0.422166	0.489466	0.242994	0.271772	0.436197	0.505037	0.441256
ENKD1.L	0.289211	0.369242	0.354338	0.442827	0.317774	0.392428	0.335419	0.535747	0.59457	0.562921	0.34082	0.35233	0.445043	0.518699	0.440347
EPCAM.L	0.537558	0.547782	0.63277	0.709123	0.697653	0.371703	0.423217	0.415195	0.593374	0.625295	0.454631	0.485499	0.523982	0.651248	0.661474
EPCAM.S	0.504356	0.468927	0.665482	0.724995	0.715527	0.377804	0.383167	0.450446	0.528484	0.504341	0.44108	0.426047	0.557964	0.62674	0.609934
ESPL1-LIKE.L	0.302299	0.212665	0.471477	0.574046	0.468742	0.272278	0.291405	0.432487	0.517777	0.636151	0.287289	0.252035	0.451982	0.545912	0.552446
ESPL1-LIKE.S	0.246796	0.333493	0.39639	0.473284	0.451262	0.278293	0.325224	0.536927	0.506059	0.630011	0.262544	0.329358	0.466659	0.489672	0.540636
FAM174.L	0.423063	0.415245	0.580914	0.478798	0.402374	0.359876	0.395556	0.557549	0.675626	0.561288	0.391469	0.4054	0.569231	0.577212	0.481831
FAM32A.L	0.277515	0.251747	0.347473	0.360374	0.346269	0.309709	0.349032	0.424102	0.442348	0.565673	0.293612	0.300389	0.385787	0.401361	0.455971
FAM64A.L	0.192517	0.198917	0.349285	0.508772	0.445576	0.195729	0.228838	0.412523	0.345529	0.53978	0.194123	0.213878	0.380904	0.42715	0.492678
FEN1.L	0.438873	0.544698	0.647575	0.605613	0.431271	0.485841	0.485901	0.679013	0.692694	0.697979	0.462357	0.5153	0.663294	0.649154	0.564625
FEZ2.S	0.30869	0.316779	0.494361	0.484547	0.502018	0.289109	0.327657	0.513722	0.491411	0.58503	0.298899	0.322218	0.504041	0.487979	0.543524
FKBP14.L	0.345614	0.396762	0.673032	0.624375	0.661948	0.316486	0.313848	0.386806	0.447605	0.530971	0.33105	0.355305	0.529919	0.53599	0.596459
GAD1.2.S	0.27198	0.294386	0.301732	0.387882	0.479613	0.24086	0.281165	0.30008	0.312309	0.459329	0.25642	0.287776	0.300906	0.350095	0.469471
GIPC2.S	0.26621	0.243312	0.337145	0.411045	0.268177	0.310752	0.368279	0.428944	0.472136	0.599846	0.288481	0.305795	0.383044	0.44159	0.434011
GJA7.S	0.262145	0.257839	0.550651	0.558273	0.572776	0.254398	0.285766	0.283771	0.394525	0.553055	0.258272	0.271803	0.417211	0.476399	0.562915
GMNN.L	0.19893	0.170065	0.348939	0.515659	0.529095	0.253441	0.259477	0.30925	0.363613	0.702522	0.226186	0.214771	0.329095	0.439636	0.615808
GTF2A1.L	0.234637	0.330649	0.373549	0.365589	0.384188	0.285435	0.217866	0.198657	0.371569	0.455521	0.260036	0.274257	0.286103	0.368579	0.419854
H1FOO.L	0.295623	0.414364	0.599637	0.697905	0.63559	0.312588	0.377688	0.675831	0.732931	0.889381	0.304106	0.396026	0.637734	0.715418	0.762485
H1FOO.S	0.356217	0.488848	0.607513	0.674499	0.623391	0.466978	0.509874	0.720628	0.784597	0.885678	0.411597	0.499361	0.664071	0.729548	0.754535
HDAC2.L	0.381108	0.439749	0.522533	0.481365	0.402067	0.38486	0.404823	0.614814	0.553475	0.608433	0.382984	0.422286	0.568674	0.51742	0.50525
HELLS.L	0.2694	0.373533	0.574808	0.555929	0.47793	0.316524	0.392574	0.605588	0.61579	0.753998	0.292962	0.383053	0.590198	0.585859	0.615964
HELLS.S	0.328249	0.333854	0.45661	0.49955	0.405298	0.342523	0.390902	0.556355	0.498428	0.617461	0.335386	0.362378	0.506482	0.498989	0.51138
HELQ-LIKE.S	0.158176	0.370582	0.506132	0.371903	0.36862	0.432508	0.43557	0.476589	0.512035	0.540676	0.295342	0.403076	0.49136	0.441969	0.454648
HMGB3.L	0.313492	0.424126	0.55011	0.56942	0.519619	0.411374	0.443348	0.644497	0.647308	0.734883	0.362433	0.433737	0.597303	0.608364	0.627251
HMGB3.S	0.381455	0.433858	0.582605	0.540412	0.499348	0.411495	0.470357	0.678592	0.714544	0.785127	0.396475	0.452108	0.630599	0.627478	0.642238
HMGXB4.S	0.277999	0.286307	0.51168	0.587116	0.50997	0.286782	0.285239	0.470209	0.469818	0.67265	0.28239	0.285773	0.490945	0.528467	0.59131
HMMR.L	0.226036	0.174559	0.355551	0.521729	0.491093	0.280217	0.298259	0.309414	0.344181	0.638028	0.253126	0.236409	0.332483	0.432955	0.56456
HNRNPAB.S	0.410224	0.464642	0.544517	0.644607	0.647959	0.394059	0.420241	0.607675	0.624239	0.689647	0.402141	0.442442	0.576096	0.634423	0.668803
HNRNPUL2.L	0.393579	0.342894	0.604803	0.764426	0.706994	0.333131	0.323767	0.468987	0.494573	0.706461	0.363355	0.333331	0.536895	0.629499	0.706727
HSF2.2.L	0.428416	0.372967	0.536822	0.506274	0.520839	0.334413	0.363083	0.506983	0.587342	0.715643	0.381414	0.368025	0.521903	0.546808	0.618241
IMMP1L.L	0.453006	0.469019	0.33364	0.412988	0.548065	0.290287	0.336146	0.476408	0.488295	0.728567	0.371646	0.402582	0.405024	0.450641	0.638316
INCENP.L	0.258614	0.299651	0.422812	0.453096	0.436425	0.342437	0.343108	0.52921	0.506074	0.684848	0.300526	0.32138	0.476011	0.479585	0.560636
INCENP.S	0.253831	0.316276	0.477179	0.546	0.507452	0.344298	0.347565	0.523813	0.554481	0.719307	0.299064	0.33192	0.500496	0.55024	0.61338
ING2.L	0.328841	0.383726	0.481717	0.484207	0.427366	0.319112	0.379059	0.501434	0.62519	0.721154	0.323976	0.381393	0.491575	0.554699	0.57426
ING2.S	0.306175	0.300045	0.401782	0.398262	0.381133	0.298131	0.318114	0.432701	0.445704	0.599363	0.302153	0.30908	0.417241	0.421983	0.490248
ITGA5.L	0.30503	0.422449	0.656247	0.64441	0.688546	0.279033	0.295918	0.234589	0.232401	0.334197	0.292032	0.359183	0.445418	0.438406	0.511371
JAK1.L	0.282961	0.317249	0.445867	0.401711	0.372991	0.361964	0.361863	0.503929	0.466041	0.521018	0.322462	0.339556	0.474898	0.433876	0.447004
KANK1.L	0.335946	0.252299	0.342055	0.358809	0.330694	0.258618	0.290465	0.3563	0.383457	0.514993	0.297282	0.271382	0.349178	0.371133	0.422843
KDM1A-LIKE.L	0.259495	0.465879	0.592227	0.603912	0.414455	0.348333	0.384754	0.597019	0.586606	0.638918	0.303914	0.425317	0.594623	0.595259	0.526686
KIAA0586.L	0.272728	0.258388	0.334407	0.445073	0.301781	0.2663	0.308719	0.443087	0.476926	0.602421	0.269514	0.283554	0.388747	0.460999	0.452101
KIAA1143.S	0.319159	0.337473	0.460504	0.569437	0.460506	0.326034	0.345738	0.50244	0.457396	0.574412	0.322596	0.341605	0.481472	0.513417	0.517459
KIAA1456.L	0.236103	0.231136	0.415303	0.528956	0.518589	0.274436	0.270861	0.321625	0.445356	0.673704	0.25527	0.250998	0.368464	0.487156	0.596146
KIF2C.L	0.295955	0.418866	0.639095	0.617469	0.542367	0.302339	0.337522	0.551472	0.519791	0.600684	0.299147	0.378194	0.595284	0.56863	0.571526
KIF2C.S	0.309915	0.379973	0.521046	0.488348	0.427396	0.315018	0.342183	0.500411	0.498768	0.575453	0.312466	0.361078	0.510728	0.493558	0.501424
KIF7.L	0.247514	0.30891	0.286034	0.431344	0.269576	0.291239	0.351283	0.535535	0.500153	0.631114	0.269377	0.330097	0.410785	0.465749	0.450345
KIN.S	0.280898	0.299828	0.434526	0.478324	0.391679	0.325082	0.320356	0.453802	0.468031	0.664378	0.30299	0.310092	0.444164	0.473178	0.528029
LARP6-LIKE.1.L	0.305803	0.304008	0.412567	0.424052	0.315667	0.331892	0.408691	0.502154	0.531134	0.491086	0.318847	0.35635	0.45736	0.477593	0.403376
LARP7.L	0.31131	0.363821	0.409099	0.461827	0.396254	0.407507	0.394408	0.54073	0.552266	0.662153	0.359409	0.379114	0.474915	0.507046	0.529204
LIG4.L	0.225523	0.18965	0.54449	0.680924	0.664664	0.278456	0.276112	0.317538	0.395194	0.70137	0.25199	0.232881	0.431014	0.538059	0.683017
LIPG.L	0.346006	0.387233	0.613025	0.700053	0.74621	0.351582	0.345753	0.32688	0.408441	0.389776	0.348794	0.366493	0.469953	0.554247	0.567993
LOC100135149.L	0.269097	0.351653	0.544802	0.381254	0.270379	0.34942	0.415979	0.690066	0.614083	0.6174	0.309259	0.383816	0.617434	0.497669	0.443889
LOC100145141.S	0.33931	0.33445	0.474003	0.53973	0.461025	0.320746	0.342469	0.502815	0.558933	0.685015	0.330028	0.338459	0.488409	0.549331	0.57302
LOC100145450.S	0.239021	0.311237	0.468585	0.388498	0.266385	0.329213	0.386893	0.52333	0.463593	0.564153	0.284117	0.349065	0.495958	0.426046	0.415269
LOC100145576.L	0.307471	0.299591	0.418483	0.372403	0.321558	0.30652	0.332558	0.534617	0.476536	0.553134	0.306996	0.316074	0.47655	0.424469	0.437346
LOC100485774.S	0.293057	0.277219	0.4706	0.560808	0.471852	0.279302	0.306726	0.358931	0.402548	0.629727	0.28618	0.291973	0.414765	0.481678	0.550789
LOC100487964.L	0.405695	0.350636	0.527643	0.484462	0.663275	0.326061	0.379532	0.560587	0.515779	0.644147	0.365878	0.365084	0.544115	0.500121	0.653711
LOC100488441.L	0.305636	0.325811	0.484432	0.463213	0.467537	0.304539	0.328039	0.456146	0.476687	0.572184	0.305088	0.326925	0.470289	0.46995	0.51986
LOC100488928.L	0.241772	0.286976	0.259631	0.35252	0.447321	0.395749	0.480119	0.562392	0.521475	0.510236	0.318761	0.383547	0.411012	0.436997	0.478779
LOC100489197-LIKE.L	0.257698	0.263295	0.255837	0.371113	0.284767	0.284981	0.310006	0.41867	0.510748	0.638738	0.27134	0.28665	0.337254	0.44093	0.461753
LOC100490651-LIKE.L	0.336892	0.34292	0.556114	0.55611	0.685564	0.290784	0.257233	0.255055	0.330989	0.348259	0.313838	0.300076	0.405585	0.44355	0.516912
LOC100491156-LIKE.S	0.281095	0.22733	0.550686	0.34206	0.337245	0.212485	0.302202	0.320165	0.398981	0.480729	0.24679	0.264766	0.435425	0.370521	0.408987
LOC100491633.L	0.390325	0.63095	0.631986	0.782216	0.76832	0.3389	0.304565	0.360506	0.452091	0.468439	0.364612	0.467757	0.496246	0.617154	0.618379
LOC100493126.S	0.269628	0.326842	0.42895	0.525726	0.423453	0.37214	0.43323	0.620392	0.620246	0.755991	0.320884	0.380036	0.524671	0.572986	0.589722
LOC100493164-LIKE.L	0.418524	0.59907	0.725246	0.796648	0.694415	0.282745	0.29555	0.466175	0.624636	0.656964	0.350635	0.44731	0.59571	0.710642	0.67569
LOC100495369.L	0.280317	0.24205	0.306228	0.45033	0.30013	0.233173	0.354972	0.321924	0.412597	0.562366	0.256745	0.298511	0.314076	0.431464	0.431248
LOC100497996.L	0.274456	0.323879	0.382863	0.394927	0.362032	0.356638	0.374388	0.546128	0.530314	0.587522	0.315547	0.349133	0.464496	0.46262	0.474777
LOC100498447.L	0.253735	0.237044	0.359516	0.393927	0.320426	0.280463	0.288937	0.423304	0.445084	0.617184	0.267099	0.262991	0.39141	0.419506	0.468805
LOC101731869-LIKE.L	0.330744	0.350586	0.338435	0.441971	0.314094	0.244094	0.279675	0.432763	0.401932	0.622995	0.287419	0.315131	0.385599	0.421951	0.468544
LOC101732260.L	0.454922	0.501512	0.617702	0.696917	0.607814	0.346657	0.387572	0.39887	0.442099	0.3799	0.400789	0.444542	0.508286	0.569508	0.493857
LOC101732879-LIKE.S	0.177229	0.347786	0.360951	0.363286	0.448947	0.330252	0.252905	0.316322	0.43673	0.543342	0.25374	0.300346	0.338637	0.400008	0.496144
LOC101733704.L	0.238532	0.259833	0.359069	0.285319	0.382478	0.301527	0.329226	0.448493	0.472693	0.598692	0.270029	0.294529	0.403781	0.379006	0.490585
LOC101734082.L	0.292672	0.330882	0.422538	0.470923	0.386576	0.319165	0.355626	0.519617	0.465285	0.480828	0.305919	0.343254	0.471077	0.468104	0.433702
LOC101734821.S	0.29403	0.464284	0.511869	0.494832	0.384263	0.285521	0.2843	0.371362	0.366447	0.425428	0.289775	0.374292	0.441615	0.430639	0.404846
LOC549858.L	0.137509	0.257637	0.257891	0.370032	0.382671	0.235949	0.339429	0.421668	0.381094	0.237886	0.186729	0.298533	0.33978	0.375563	0.310279
LOC733561.S	0.411122	0.440785	0.518807	0.628813	0.569019	0.340175	0.365872	0.625712	0.731605	0.838407	0.375649	0.403328	0.57226	0.680209	0.703713
LYRM4.L	0.477546	0.490626	0.529478	0.615237	0.444092	0.392186	0.505377	0.654971	0.686208	0.644045	0.434866	0.498002	0.592225	0.650722	0.544069
MAGOH.S	0.411304	0.435667	0.61852	0.732139	0.704777	0.391146	0.415488	0.585079	0.69239	0.778875	0.401225	0.425578	0.6018	0.712265	0.741826
MAP1LC3C.L	0.344497	0.414307	0.609831	0.568192	0.51603	0.370643	0.480123	0.644498	0.713924	0.724464	0.35757	0.447215	0.627165	0.641058	0.620247
MARCKS.L	0.384086	0.436419	0.504961	0.567628	0.552395	0.431591	0.488234	0.624595	0.619712	0.615677	0.407839	0.462326	0.564778	0.59367	0.584036
MARVELD3.L	0.279892	0.390822	0.668222	0.682357	0.544598	0.345686	0.489102	0.693442	0.730668	0.845274	0.312789	0.439962	0.680832	0.706512	0.694936
MCM10.L	0.247893	0.407225	0.640991	0.641658	0.494614	0.287952	0.331865	0.577482	0.581174	0.684192	0.267923	0.369545	0.609237	0.611416	0.589403
MED19.L	0.258746	0.282793	0.523284	0.590776	0.633903	0.28125	0.320497	0.468363	0.445056	0.611151	0.269998	0.301645	0.495823	0.517916	0.622527
MED30.S	0.391687	0.375316	0.481372	0.676616	0.510087	0.359321	0.418167	0.655365	0.70578	0.745967	0.375504	0.396741	0.568369	0.691198	0.628027
MFSD9.L	0.367095	0.426541	0.524146	0.655669	0.553116	0.370888	0.358429	0.290557	0.339231	0.488313	0.368992	0.392485	0.407351	0.49745	0.520714
MGC69335.S	0.246783	0.367675	0.447229	0.447883	0.322541	0.376467	0.41894	0.479602	0.472381	0.585222	0.311625	0.393307	0.463416	0.460132	0.453882
MITD1.L	0.321714	0.374289	0.413959	0.5324	0.463532	0.32778	0.423775	0.514168	0.563628	0.636181	0.324747	0.399032	0.464063	0.548014	0.549857
MNAT1.L	0.185559	0.204377	0.390579	0.355539	0.352665	0.277245	0.31782	0.498237	0.508265	0.575858	0.231402	0.261099	0.444408	0.431902	0.464261
MPC1.S	0.405693	0.346729	0.501909	0.509276	0.714066	0.441834	0.448748	0.568561	0.607989	0.644544	0.423763	0.397738	0.535235	0.558633	0.679305
NAA40.S	0.408823	0.454555	0.430478	0.526758	0.559367	0.404258	0.397211	0.506767	0.641713	0.641219	0.406541	0.425883	0.468623	0.584236	0.600293
NEK2-LIKE.1.S	0.152506	0.484117	0.699956	0.7644	0.638821	0.372196	0.470902	0.686891	0.65921	0.817874	0.262351	0.47751	0.693423	0.711805	0.728348
NFKB2.S	0.339148	0.375825	0.545924	0.634337	0.446119	0.282035	0.302509	0.46968	0.45056	0.604449	0.310591	0.339167	0.507802	0.542449	0.525284
NOSIP.S	0.466381	0.548741	0.654904	0.592075	0.449423	0.489895	0.515045	0.664839	0.673372	0.693639	0.478138	0.531893	0.659872	0.632724	0.571531
NUCKS1.L	0.307747	0.23832	0.390827	0.505807	0.486657	0.308101	0.291914	0.358935	0.370734	0.612394	0.307924	0.265117	0.374881	0.438271	0.549525
OPTN.S	0.236016	0.402255	0.483952	0.431349	0.396115	0.358754	0.396026	0.574165	0.520123	0.663013	0.297385	0.39914	0.529059	0.475736	0.529564
ORC6.L	0.315777	0.380364	0.530512	0.570794	0.512064	0.328033	0.408806	0.588134	0.730712	0.751309	0.321905	0.394585	0.559323	0.650753	0.631686
OSBP.L	0.459788	0.509934	0.534349	0.571817	0.446861	0.423979	0.463592	0.670765	0.574191	0.501925	0.441883	0.486763	0.602557	0.573004	0.474393
PDCD5.L	0.354527	0.457547	0.535319	0.524684	0.479355	0.4603	0.431387	0.709918	0.687094	0.696047	0.407414	0.444467	0.622618	0.605889	0.587701
PLK1.L	0.313116	0.510669	0.656213	0.704797	0.662174	0.299506	0.300124	0.557517	0.501061	0.569182	0.306311	0.405396	0.606865	0.602929	0.615678
PLK1.S	0.395004	0.50072	0.599901	0.692245	0.599059	0.29399	0.254395	0.464484	0.444431	0.513788	0.344497	0.377558	0.532193	0.568338	0.556423
PLK3.L	0.317647	0.485715	0.543953	0.564736	0.41836	0.444833	0.398098	0.506822	0.514291	0.50269	0.38124	0.441906	0.525388	0.539513	0.460525
PLK3.S	0.397571	0.397933	0.567855	0.744582	0.600437	0.342948	0.373158	0.513282	0.51238	0.553677	0.370259	0.385546	0.540569	0.628481	0.577057
PPP2R2B.L	0.275776	0.252064	0.529522	0.732969	0.75055	0.250621	0.254852	0.423246	0.481838	0.736598	0.263198	0.253458	0.476384	0.607404	0.743574
PPP2R2B.S	0.35809	0.276817	0.447931	0.636926	0.627808	0.302216	0.279997	0.489795	0.561934	0.73443	0.330153	0.278407	0.468863	0.59943	0.681119
PRPF38A.L	0.437755	0.465279	0.626399	0.78418	0.561668	0.322517	0.352562	0.541866	0.573816	0.765256	0.380136	0.408921	0.584133	0.678998	0.663462
PRPF4.L	0.271197	0.347298	0.34312	0.348958	0.309283	0.360279	0.344555	0.520433	0.522804	0.633657	0.315738	0.345926	0.431776	0.435881	0.47147
PRR13-LIKE.L	0.417816	0.451076	0.661449	0.764349	0.638618	0.328479	0.389106	0.623043	0.700913	0.793308	0.373147	0.420091	0.642246	0.732631	0.715963
PRRG4.S	0.286219	0.289054	0.45632	0.48495	0.591961	0.318185	0.326602	0.336152	0.375154	0.313025	0.302202	0.307828	0.396236	0.430052	0.452493
PSAP.S	0.387917	0.501344	0.613563	0.523466	0.518393	0.312194	0.405446	0.417498	0.492861	0.402281	0.350056	0.453395	0.515531	0.508163	0.460337
PSPC1.L	0.402836	0.330819	0.54244	0.57142	0.504405	0.287939	0.273073	0.413763	0.52457	0.673687	0.345387	0.301946	0.478102	0.547995	0.589046
PWWP2A-LIKE.S	0.204919	0.320696	0.34679	0.392828	0.31693	0.25218	0.291041	0.459493	0.471688	0.531314	0.22855	0.305868	0.403142	0.432258	0.424122
RAD51AP1-LIKE.L	0.254448	0.245135	0.341809	0.446274	0.421398	0.282517	0.290336	0.360077	0.434504	0.640067	0.268483	0.267735	0.350943	0.440389	0.530732
REV1.L	0.266374	0.25595	0.24694	0.286019	0.254355	0.27246	0.330918	0.447074	0.471624	0.598189	0.269417	0.293434	0.347007	0.378821	0.426272
RIF1.S	0.253669	0.332159	0.412468	0.34548	0.333011	0.365695	0.420687	0.524391	0.550103	0.592918	0.309682	0.376423	0.468429	0.447792	0.462964
RIPK1.L	0.222485	0.129077	0.376195	0.402779	0.263643	0.188487	0.339099	0.508128	0.534155	0.515371	0.205486	0.234088	0.442161	0.468467	0.389507
SARNP.L	0.411499	0.493972	0.629398	0.63959	0.554386	0.350787	0.400085	0.624323	0.650164	0.756434	0.381143	0.447028	0.62686	0.644877	0.65541
SARNP.S	0.335342	0.360989	0.661721	0.678237	0.570108	0.351164	0.394694	0.618641	0.624946	0.78026	0.343253	0.377842	0.640181	0.651592	0.675184
SCAF8.L	0.273479	0.258972	0.46542	0.489221	0.43533	0.257589	0.322418	0.441846	0.409131	0.512985	0.265534	0.290695	0.453633	0.449176	0.474157
SCAF8.S	0.263948	0.212073	0.382908	0.38108	0.318569	0.215898	0.325361	0.413153	0.427143	0.532403	0.239923	0.268717	0.39803	0.404112	0.425486
SCOC-LIKE.S	0.304738	0.405288	0.566796	0.502069	0.364053	0.382808	0.54663	0.623417	0.737668	0.611701	0.343773	0.475959	0.595106	0.619869	0.487877
SDE2.S	0.307257	0.260969	0.314153	0.462079	0.382245	0.268986	0.310677	0.422081	0.527481	0.657794	0.288122	0.285823	0.368117	0.49478	0.520019
SEPT10.L	0.357405	0.386989	0.498963	0.491789	0.378861	0.334781	0.334558	0.560428	0.568655	0.667392	0.346093	0.360774	0.529696	0.530222	0.523126
SGOL1.L	0.269626	0.262723	0.463632	0.496797	0.417845	0.284667	0.296901	0.469634	0.510683	0.655263	0.277146	0.279812	0.466633	0.50374	0.536554
SH3PXD2B.L	0.238548	0.214096	0.253982	0.427424	0.397914	0.283051	0.280143	0.350174	0.318547	0.481563	0.2608	0.247119	0.302078	0.372985	0.439738
SLC12A3.2.S	0.328834	0.544164	0.729672	0.60185	0.618788	0.392984	0.437764	0.652478	0.629704	0.525236	0.360909	0.490964	0.691075	0.615777	0.572012
SLC6A14.2.L	0.227813	0.291761	0.666026	0.518011	0.527788	0.288205	0.270648	0.284693	0.307995	0.297045	0.258009	0.281204	0.475359	0.413003	0.412417
SMAD1.L	0.338473	0.337585	0.506076	0.548805	0.447285	0.3481	0.334292	0.51952	0.50155	0.703519	0.343286	0.335939	0.512798	0.525177	0.575402
SMC3.L	0.255841	0.284015	0.356165	0.354794	0.342177	0.293779	0.344552	0.53913	0.536759	0.66483	0.27481	0.314284	0.447648	0.445777	0.503504
SMC3.S	0.276992	0.308146	0.416507	0.434746	0.386088	0.330917	0.333744	0.419156	0.460965	0.640428	0.303954	0.320945	0.417832	0.447855	0.513258
SNRNP27.S	0.436728	0.534625	0.331579	0.721349	0.78206	0.362383	0.361961	0.475465	0.396934	0.503214	0.399555	0.448293	0.403522	0.559141	0.642637
SNRNP70.S	0.33446	0.309173	0.355484	0.41904	0.474325	0.403514	0.398607	0.44062	0.441036	0.543347	0.368987	0.35389	0.398052	0.430038	0.508836
SNRPA.S	0.289416	0.286919	0.430854	0.506491	0.490076	0.263353	0.293094	0.359353	0.448214	0.603163	0.276385	0.290006	0.395104	0.477353	0.546619
SNUPN.L	0.350946	0.263303	0.606909	0.635314	0.472661	0.308139	0.411819	0.404595	0.535015	0.53535	0.329542	0.337561	0.505752	0.585164	0.504005
SPC25.L	0.278301	0.363636	0.478107	0.508602	0.509995	0.295931	0.368777	0.502054	0.536959	0.666188	0.287116	0.366207	0.490081	0.52278	0.588091
SPCS3.L	0.369621	0.423926	0.603076	0.736341	0.608504	0.268508	0.259508	0.365712	0.269378	0.272395	0.319064	0.341717	0.484394	0.502859	0.440449
SPDL1.L	0.23285	0.267449	0.361445	0.447676	0.370728	0.272971	0.304948	0.482502	0.445713	0.586301	0.252911	0.286198	0.421974	0.446694	0.478515
SPICE1.L	0.212912	0.271856	0.438501	0.52935	0.445288	0.284413	0.288055	0.464639	0.490503	0.6414	0.248663	0.279956	0.45157	0.509926	0.543344
SPINT2.L	0.447945	0.390121	0.510232	0.56943	0.475217	0.334574	0.395033	0.470058	0.527337	0.518653	0.391259	0.392577	0.490145	0.548384	0.496935
SPRTN.S	0.269713	0.353393	0.492594	0.532875	0.390299	0.280028	0.293809	0.375214	0.368883	0.452924	0.274871	0.323601	0.433904	0.450879	0.421612
SRP72.S	0.440374	0.478547	0.635543	0.615474	0.592306	0.412533	0.458101	0.642721	0.595353	0.678986	0.426454	0.468324	0.639132	0.605413	0.635646
SRRT.S	0.287962	0.280146	0.371304	0.489185	0.492819	0.290981	0.292054	0.421683	0.418827	0.555261	0.289471	0.2861	0.396494	0.454006	0.52404
SRSF11-LIKE.L	0.322515	0.442153	0.653072	0.719194	0.649682	0.42085	0.429768	0.69119	0.712137	0.843603	0.371682	0.43596	0.672131	0.715665	0.746642
SRSF11-LIKE.S	0.360169	0.355191	0.579949	0.480527	0.406846	0.401713	0.394362	0.564592	0.566469	0.65119	0.380941	0.374777	0.57227	0.523498	0.529018
SSR3.L	0.480482	0.413874	0.586942	0.790355	0.548256	0.380178	0.479354	0.612149	0.653009	0.625935	0.43033	0.446614	0.599546	0.721682	0.587095
SSX2IP-LIKE.L	0.200853	0.172825	0.278956	0.529526	0.496648	0.276729	0.261206	0.296626	0.311785	0.630657	0.238791	0.217015	0.287791	0.420656	0.563652
SSX2IP-LIKE.S	0.298926	0.305012	0.654013	0.715521	0.656584	0.29984	0.325743	0.558017	0.619648	0.749063	0.299383	0.315378	0.606015	0.667585	0.702824
STIM1.L	0.315107	0.383124	0.394042	0.446991	0.461576	0.282255	0.335631	0.40517	0.425517	0.462483	0.298681	0.359377	0.399606	0.436254	0.46203
STIM1.S	0.17255	0.286962	0.326141	0.410832	0.375684	0.242246	0.297403	0.354947	0.333573	0.337175	0.207398	0.292183	0.340544	0.372202	0.356429
SUGP2.L	0.353616	0.355825	0.447273	0.501374	0.440529	0.399957	0.437217	0.572022	0.589993	0.630914	0.376786	0.396521	0.509648	0.545684	0.535721
SUN1.L	0.372166	0.502034	0.510093	0.565269	0.365606	0.331045	0.344546	0.49483	0.454259	0.446453	0.351606	0.42329	0.502462	0.509764	0.406029
SYAP1.L	0.325886	0.380014	0.479866	0.360743	0.326872	0.350892	0.375417	0.521167	0.615283	0.688115	0.338389	0.377715	0.500517	0.488013	0.507494
TBC1D8.S	0.179073	0.14896	0.205441	0.356473	0.277511	0.212307	0.229973	0.269207	0.282711	0.444879	0.19569	0.189467	0.237324	0.319592	0.361195
TMED10.1	0.403925	0.517104	0.580447	0.555551	0.375958	0.35395	0.382235	0.550487	0.52153	0.60622	0.378937	0.449669	0.565467	0.538541	0.491089
TMEM52.L	0.218483	0.272363	0.54312	0.587635	0.52214	0.0758142	0.120588	0.200757	0.210086	0.234141	0.147149	0.196475	0.371938	0.39886	0.378141
TOMM20.S	0.390511	0.540055	0.658707	0.756043	0.622924	0.419437	0.488205	0.681692	0.698303	0.766558	0.404974	0.51413	0.670199	0.727173	0.694741
TOP1.2.S	0.277579	0.274222	0.460181	0.453342	0.43302	0.327159	0.307803	0.50634	0.52025	0.688878	0.302369	0.291012	0.48326	0.486796	0.560949
TP53RK.1	0.235671	0.248455	0.245857	0.298876	0.412495	0.240749	0.328231	0.376691	0.372752	0.363986	0.23821	0.288343	0.311274	0.335814	0.388241
TPRKB.S	0.377393	0.382347	0.613739	0.452161	0.330045	0.283786	0.328455	0.607034	0.543818	0.611096	0.330589	0.355401	0.610387	0.497989	0.47057
TYW3.L	0.347795	0.372737	0.42672	0.386571	0.376622	0.302777	0.309357	0.479774	0.548437	0.699931	0.325286	0.341047	0.453247	0.467504	0.538276
UBE2C.L	0.353103	0.347077	0.345977	0.544474	0.506871	0.381822	0.400471	0.581192	0.64579	0.778298	0.367463	0.373774	0.463585	0.595132	0.642584
UBE2C.S	0.343088	0.367121	0.345897	0.58223	0.583432	0.366717	0.472158	0.563187	0.665588	0.832905	0.354902	0.419639	0.454542	0.623909	0.708168
UPK3A.L	0.2948	0.480753	0.561666	0.633268	0.548651	0.377547	0.351635	0.462072	0.512124	0.416175	0.336174	0.416194	0.511869	0.572696	0.482413
USP15.L	0.293195	0.345085	0.496195	0.511491	0.31023	0.345154	0.412937	0.483063	0.469267	0.5352	0.319175	0.379011	0.489629	0.490379	0.422715
VPS4B.S	0.318893	0.40574	0.452413	0.43479	0.322969	0.363451	0.456183	0.543696	0.504314	0.568944	0.341172	0.430961	0.498054	0.469552	0.445956
VRK1.S	0.245895	0.236224	0.301141	0.442031	0.414867	0.248213	0.295215	0.394983	0.360701	0.606042	0.247054	0.265719	0.348062	0.401366	0.510454
WBP11.S	0.367301	0.550446	0.52382	0.583565	0.486374	0.407881	0.467876	0.601434	0.648582	0.670964	0.387591	0.509161	0.562627	0.616074	0.578669
XELAEV18000730M	0.209426	0.166129	0.356815	0.608346	0.650713	0.252113	0.252388	0.303698	0.305522	0.543797	0.230769	0.209258	0.330256	0.456934	0.597255
XELAEV18002272M	0.243373	0.23272	0.460721	0.649244	0.573059	0.253678	0.267411	0.304845	0.370256	0.608527	0.248525	0.250066	0.382783	0.50975	0.590793
XELAEV18004041M	0.492511	0.403952	0.705221	0.523667	0.583402	0.28204	0.508181	0.611882	0.691273	0.593668	0.387275	0.456067	0.658551	0.60747	0.588535
XELAEV18004444M	0.288099	0.32097	0.465683	0.523152	0.648343	0.299692	0.278019	0.264768	0.299886	0.329932	0.293895	0.299495	0.365226	0.411519	0.489137
XELAEV18004814M	0.312492	0.413498	0.569189	0.598236	0.554242	0.40765	0.391229	0.708772	0.630568	0.757647	0.360071	0.402363	0.638981	0.614402	0.655945
XELAEV18005367M	0.355348	0.388541	0.670165	0.630088	0.64401	0.315174	0.386528	0.66137	0.583615	0.691198	0.335261	0.387535	0.665767	0.606851	0.667604
XELAEV18005411M	0.597382	0.72726	0.821044	0.866501	0.81247	0.487934	0.566837	0.753981	0.790952	0.854435	0.542658	0.647048	0.787513	0.828727	0.833453
XELAEV18005591M	0.33361	0.354892	0.439127	0.552842	0.418109	0.341404	0.327492	0.532099	0.482205	0.607534	0.337507	0.341192	0.485613	0.517524	0.512822
XELAEV18005920M	0.409946	0.361124	0.38864	0.463695	0.63495	0.381729	0.424386	0.572475	0.610379	0.679004	0.395837	0.392755	0.480557	0.537037	0.656977
XELAEV18006024M	0.37359	0.482248	0.511871	0.644358	0.608318	0.432182	0.491351	0.60149	0.705569	0.771162	0.402886	0.486799	0.556681	0.674964	0.68974
XELAEV18007598M	0.435364	0.371162	0.507217	0.493131	0.519872	0.38991	0.425669	0.63539	0.718501	0.861569	0.412637	0.398415	0.571303	0.605816	0.69072
XELAEV18007849M	0.43833	0.456139	0.626911	0.596077	0.602615	0.351938	0.418241	0.532306	0.587485	0.602857	0.395134	0.43719	0.579608	0.591781	0.602736
XELAEV18009158M	0.367495	0.493663	0.570002	0.62107	0.578194	0.442853	0.463936	0.646615	0.6526	0.706295	0.405174	0.478799	0.608308	0.636835	0.642244
XELAEV18009309M	0.218432	0.242898	0.408839	0.591764	0.451885	0.307438	0.305039	0.412826	0.445154	0.625602	0.262935	0.273969	0.410832	0.518459	0.538743
XELAEV18009580M	0.395721	0.501725	0.558638	0.632048	0.584229	0.392402	0.463892	0.59428	0.656228	0.711643	0.394061	0.482809	0.576459	0.644138	0.647936
XELAEV18010325M	0.405575	0.512266	0.613244	0.784795	0.636592	0.335225	0.359326	0.474367	0.654823	0.739567	0.3704	0.435796	0.543805	0.719809	0.68808
XELAEV18010496M	0.395625	0.414818	0.458774	0.480296	0.412498	0.370432	0.395737	0.598347	0.699183	0.821807	0.383028	0.405278	0.52856	0.58974	0.617152
XELAEV18010504M	0.328464	0.521329	0.514775	0.564847	0.470969	0.368416	0.372461	0.555777	0.557442	0.584735	0.34844	0.446895	0.535276	0.561145	0.527852
XELAEV18012089M	0.231167	0.30106	0.450265	0.489771	0.269616	0.285409	0.281776	0.455526	0.469193	0.629177	0.258288	0.291418	0.452895	0.479482	0.449397
XELAEV18012655M	0.278749	0.290866	0.489773	0.468493	0.343655	0.308808	0.317996	0.522079	0.511526	0.535105	0.293778	0.304431	0.505926	0.49001	0.43938
XELAEV18013051M	0.288159	0.409465	0.810544	0.701557	0.629768	0.425619	0.449393	0.353532	0.471261	0.422738	0.356889	0.429429	0.582038	0.586409	0.526253
XELAEV18015088M	0.213812	0.312761	0.284654	0.376591	0.330328	0.236613	0.277111	0.520733	0.539921	0.552386	0.225213	0.294936	0.402693	0.458256	0.441357
XELAEV18015585M	0.35942	0.338581	0.699456	0.766512	0.595043	0.293833	0.401564	0.487337	0.337469	0.503387	0.326627	0.370072	0.593396	0.551991	0.549215
XELAEV18015757M	0.309169	0.351172	0.233793	0.307146	0.316798	0.304658	0.442669	0.541155	0.671305	0.723411	0.306913	0.39692	0.387474	0.489225	0.520105
XELAEV18019025M	0.22334	0.200318	0.293369	0.451452	0.460337	0.263203	0.258674	0.316944	0.335136	0.447042	0.243271	0.229496	0.305157	0.393294	0.45369
XELAEV18020022M	0.328042	0.447323	0.53559	0.652318	0.549047	0.395646	0.388802	0.701399	0.641602	0.730632	0.361844	0.418062	0.618495	0.64696	0.639839
XELAEV18021877M	0.437781	0.534072	0.695673	0.659523	0.603591	0.304984	0.409838	0.381285	0.534289	0.542145	0.371382	0.471955	0.538479	0.596906	0.572868
XELAEV18021960M	0.242829	0.316001	0.377532	0.481237	0.400165	0.331054	0.288454	0.457725	0.472152	0.537715	0.286942	0.302227	0.417629	0.476695	0.46894
XELAEV18023049M	0.403715	0.436407	0.47208	0.59177	0.502386	0.30306	0.305021	0.371656	0.407177	0.527873	0.353387	0.370714	0.421868	0.499473	0.515129
XELAEV18023248M	0.303166	0.460791	0.656391	0.721954	0.595535	0.320536	0.346362	0.528063	0.687932	0.709462	0.311851	0.403577	0.592227	0.704943	0.652498
XELAEV18023324M	0.230626	0.223918	0.392025	0.479127	0.384143	0.270603	0.276769	0.424244	0.442922	0.589521	0.250614	0.250344	0.408135	0.461024	0.486832
XELAEV18024417M	0.275554	0.436003	0.309176	0.392346	0.326442	0.288485	0.203784	0.255511	0.339969	0.549328	0.28202	0.319893	0.282343	0.366158	0.437885
XELAEV18025163M	0.455525	0.454473	0.509338	0.622924	0.491697	0.356016	0.383615	0.535845	0.627287	0.679043	0.40577	0.419044	0.522592	0.625105	0.58537
XELAEV18025187M	0.3836	0.527923	0.46639	0.415006	0.40177	0.491329	0.51735	0.731414	0.706259	0.693632	0.437465	0.522636	0.598902	0.560632	0.547701
XELAEV18025385M	0.238973	0.258332	0.319446	0.391244	0.312691	0.292598	0.310404	0.470573	0.467408	0.613396	0.265786	0.284368	0.39501	0.429326	0.463044
XELAEV18026468M	0.340589	0.440327	0.712672	0.709503	0.631003	0.32746	0.345308	0.559326	0.514648	0.60127	0.334024	0.392818	0.635999	0.612075	0.616136
XELAEV18027329M	0.396172	0.402021	0.544785	0.574172	0.502939	0.342399	0.448163	0.593941	0.530306	0.676183	0.369286	0.425092	0.569363	0.552239	0.589561
XELAEV18027393M	0.327615	0.286212	0.476917	0.564212	0.509892	0.31259	0.324471	0.419384	0.452935	0.554279	0.320103	0.305342	0.448151	0.508574	0.532086
XELAEV18027946M	0.235693	0.177325	0.398976	0.355984	0.296881	0.233833	0.316872	0.382483	0.364988	0.3563	0.234763	0.247099	0.39073	0.360486	0.32659
XELAEV18028444M	0.444084	0.513144	0.593107	0.606372	0.66281	0.285166	0.33709	0.357429	0.394008	0.430575	0.364625	0.425117	0.475268	0.50019	0.546692
XELAEV18028513M	0.313791	0.325932	0.526901	0.724181	0.711642	0.311639	0.306901	0.429483	0.53574	0.725198	0.312715	0.316416	0.478192	0.62996	0.71842
XELAEV18029473M	0.324176	0.377901	0.536187	0.518268	0.353401	0.335991	0.339759	0.545325	0.428057	0.42655	0.330083	0.35883	0.540756	0.473163	0.389976
XELAEV18029756M	0.289546	0.299424	0.343275	0.520853	0.388303	0.302368	0.332207	0.354351	0.382171	0.580675	0.295957	0.315816	0.348813	0.451512	0.484489
XELAEV18030436M	0.481276	0.548005	0.520561	0.667269	0.562641	0.411311	0.368308	0.601209	0.62728	0.66302	0.446294	0.458156	0.560885	0.647274	0.61283
XELAEV18031327M	0.368317	0.407656	0.672348	0.562694	0.60065	0.358544	0.425298	0.593413	0.537958	0.567472	0.363431	0.416477	0.63288	0.550326	0.584061
XELAEV18031433M	0.417757	0.443953	0.504638	0.505513	0.575019	0.441593	0.49504	0.630674	0.592345	0.680031	0.429675	0.469496	0.567656	0.548929	0.627525
XELAEV18032654M	0.410923	0.410704	0.494369	0.499032	0.645084	0.378745	0.285933	0.432518	0.53183	0.718802	0.394834	0.348318	0.463443	0.515431	0.681943
XELAEV18033331M	0.388677	0.494984	0.703361	0.736876	0.557042	0.512241	0.564532	0.732656	0.725433	0.790641	0.450459	0.529758	0.718009	0.731154	0.673842
XELAEV18035897M	0.414373	0.518121	0.602901	0.620233	0.556343	0.389217	0.379135	0.56714	0.610639	0.661238	0.401795	0.448628	0.585021	0.615436	0.60879
XELAEV18036021M	0.316218	0.353436	0.63331	0.53953	0.577694	0.20683	0.318758	0.237084	0.292481	0.411756	0.261524	0.336097	0.435197	0.416006	0.494725
XELAEV18037678M	0.376605	0.45293	0.64287	0.725466	0.605099	0.402451	0.432084	0.588756	0.571169	0.652769	0.389528	0.442507	0.615813	0.648317	0.628934
XELAEV18037835M	0.338538	0.331021	0.520993	0.536754	0.561266	0.283028	0.306547	0.397355	0.416501	0.519937	0.310783	0.318784	0.459174	0.476627	0.540602
XELAEV18038420M	0.509955	0.410516	0.567267	0.635165	0.632971	0.322523	0.445718	0.707517	0.654028	0.694536	0.416239	0.428117	0.637392	0.644597	0.663754
XELAEV18039821M	0.194567	0.245635	0.318147	0.323522	0.322127	0.276904	0.319242	0.443299	0.4839	0.577188	0.235735	0.282438	0.380723	0.403711	0.449658
XELAEV18040789M	0.39364	0.496476	0.547114	0.587976	0.575593	0.374945	0.432814	0.536412	0.615682	0.77576	0.384293	0.464645	0.541763	0.601829	0.675677
XELAEV18041119M	0.183139	0.181742	0.338382	0.282559	0.231438	0.24374	0.305699	0.387389	0.460811	0.522757	0.21344	0.24372	0.362886	0.371685	0.377098
XELAEV18041964M	0.253224	0.370943	0.523559	0.591686	0.514092	0.327963	0.372269	0.595011	0.615756	0.69129	0.290594	0.371606	0.559285	0.603721	0.602691
XELAEV18042389M	0.216047	0.288155	0.622412	0.719109	0.536376	0.155447	0.411521	0.420487	0.609272	0.717074	0.185747	0.349838	0.521449	0.66419	0.626725
XELAEV18042519M	0.257407	0.406621	0.472477	0.605694	0.622674	0.336526	0.236642	0.398047	0.309559	0.636036	0.296967	0.321631	0.435262	0.457627	0.629355
XELAEV18042903M	0.380565	0.235108	0.329008	0.482355	0.469892	0.335839	0.431856	0.631096	0.694386	0.789927	0.358202	0.333482	0.480052	0.588371	0.629909
XELAEV18043012M	0.395699	0.458176	0.394687	0.547328	0.485789	0.295805	0.366054	0.426586	0.492086	0.600664	0.345752	0.412115	0.410636	0.519707	0.543226
XELAEV18043036M	0.268063	0.34413	0.471735	0.550068	0.44763	0.259905	0.286042	0.347566	0.405575	0.436582	0.263984	0.315086	0.409651	0.477821	0.442106
XELAEV18043657M	0.368411	0.430121	0.567496	0.657706	0.545862	0.310625	0.290248	0.430849	0.426153	0.582479	0.339518	0.360185	0.499172	0.54193	0.564171
XELAEV18044303M	0.312415	0.418336	0.541953	0.558732	0.49765	0.352612	0.327586	0.537019	0.482256	0.514182	0.332513	0.372961	0.539486	0.520494	0.505916
XELAEV18044744M	0.328951	0.504688	0.671462	0.683575	0.620347	0.281608	0.359987	0.522149	0.582029	0.585648	0.30528	0.432337	0.596805	0.632802	0.602998
XELAEV18044794M	0.392139	0.395418	0.273978	0.35481	0.498151	0.273001	0.288761	0.419291	0.46093	0.582311	0.33257	0.34209	0.346634	0.40787	0.540231
XELAEV18044913M	0.321801	0.308741	0.401327	0.539747	0.436069	0.297226	0.262953	0.400287	0.441667	0.765981	0.309514	0.285847	0.400807	0.490707	0.601025
XELAEV18047160M	0.379201	0.374499	0.494053	0.522094	0.496698	0.348573	0.352006	0.562935	0.522971	0.696232	0.363887	0.363253	0.528494	0.522533	0.596465
XETROV90001894M.L	0.293053	0.526042	0.763309	0.752548	0.633913	0.310921	0.383826	0.691118	0.622531	0.668307	0.301987	0.454934	0.727213	0.68754	0.65111
XETROV90005081M.S	0.42304	0.485036	0.585706	0.58882	0.481052	0.497312	0.516369	0.651618	0.697448	0.726922	0.460176	0.500703	0.618662	0.643134	0.603987
XETROV90012236M.L	0.429437	0.441487	0.344244	0.414795	0.44193	0.306435	0.321939	0.518263	0.521449	0.653509	0.367936	0.381713	0.431254	0.468122	0.547719
XETROV90013674M.L	0.352909	0.466823	0.251759	0.478215	0.522427	0.345834	0.368527	0.524099	0.493034	0.525467	0.349372	0.417675	0.387929	0.485624	0.523947
XETROV90016523M.L	0.348489	0.385248	0.562567	0.560948	0.484807	0.285306	0.344611	0.450949	0.418006	0.45982	0.316898	0.364929	0.506758	0.489477	0.472313
XETROV90017899M.S	0.402517	0.398907	0.497606	0.524502	0.428117	0.317007	0.333516	0.490299	0.529829	0.618703	0.359762	0.366211	0.493952	0.527166	0.52341
XETROV90018273M.L	0.220632	0.276055	0.409399	0.391434	0.443085	0.264973	0.277651	0.259845	0.406743	0.397265	0.242803	0.276853	0.334622	0.399089	0.420175
XETROV90023592M.S	0.183915	0.305076	0.504488	0.497985	0.442829	0.247606	0.271792	0.357878	0.364366	0.561481	0.215761	0.288434	0.431183	0.431176	0.502155
XGB.L	0.30736	0.260536	0.537184	0.65439	0.568866	0.299818	0.307388	0.534526	0.550208	0.754982	0.303589	0.283962	0.535855	0.602299	0.661924
XRN2.L	0.207847	0.287696	0.397193	0.45683	0.353726	0.248981	0.263512	0.361528	0.336601	0.412092	0.228414	0.275604	0.379361	0.396716	0.382909
YTHDC1.L	0.358783	0.34998	0.339745	0.40656	0.363219	0.364494	0.343021	0.487647	0.516044	0.645516	0.361638	0.3465	0.413696	0.461302	0.504368
ZC3.S1A-LIKE.S	0.270804	0.221394	0.35131	0.41837	0.397473	0.286083	0.303273	0.448677	0.405298	0.520594	0.278443	0.262334	0.399994	0.411834	0.459034
ZMAT2.S	0.375331	0.433994	0.507148	0.50257	0.482932	0.443707	0.434969	0.561956	0.632095	0.71036	0.409519	0.434482	0.534552	0.567333	0.596646
ZNF706.L	0.384411	0.447966	0.475457	0.479431	0.400171	0.365851	0.463212	0.618998	0.729134	0.681967	0.375131	0.455589	0.547227	0.604283	0.541069

## Sheet: Chromosome
Human Uniprot Accession	Gene Description
Q8WYP5	AT-hook containing transcription factor 1(AHCTF1)
Q8IZA3	H1 histone family member O, oocyte specific(H1FOO)
Q9HBM1	SPC25, NDC80 kinetochore complex component(SPC25)
Q9H040	SprT-like N-terminal domain(SPRTN)
Q53HL2	cell division cycle associated 8(CDCA8)
P09429	high mobility group box 1(HMGB1)
O15347	high mobility group box 3(HMGB3)
Q9NQS7	inner centromere protein(INCENP)
Q99661	kinesin family member 2C(KIF2C)
O95239	kinesin family member 4A(KIF4A)
Q8NG31	kinetochore scaffold 1(KNL1)
P53350	polo like kinase 1(PLK1)
Q5UIP0	replication timing regulatory factor 1(RIF1)
Q5FBB7	shugoshin 1(SGO1)
Q96EA4	spindle apparatus coiled-coil protein 1(SPDL1)
Q9UQE7	structural maintenance of chromosomes 3(SMC3)

## Sheet: mRNA processing
Huamn Uniprot Accession	Gene Description
Q9H0D6	5'-3' exoribonuclease 2(XRN2)
Q9P013	CWC15 spliceosome associated protein homolog(CWC15)
O60870	Kin17 DNA and RNA binding protein(KIN)
Q9UPN6	SR-related CTD associated factor 8(SCAF8)
Q8IX01	SURP and G-patch domain containing 2(SUGP2)
Q9Y2W2	WW domain binding protein 11(WBP11)
Q96MU7	YTH domain containing 1(YTHDC1)
O60508	cell division cycle 40(CDC40)
Q12996	cleavage stimulation factor subunit 3(CSTF3)
P61326	mago homolog, exon junction complex core component(MAGOH)
Q8NAV1	pre-mRNA processing factor 38A(PRPF38A)
O43172	pre-mRNA processing factor 4(PRPF4)
Q05519	serine and arginine rich splicing factor 11(SRSF11)
Q8WVK2	small nuclear ribonucleoprotein U4/U6.U5 subunit 27(SNRNP27)
P09012	small nuclear ribonucleoprotein polypeptide A(SNRPA)
