# Supplementary material
Source: HighWire-hosted journal article supplement (doi:10.1101/rna.073247.119)
Supplement: Supplemental_Table_S9.xlsx [file Supplemental_Table_S9.xlsx]

## Sheet: Translation Increase 2
gene	noPGpolyper.x	PG90polyper.x	MIpolyper.x	Intpolyper.x	MIIpolyper.x	noPGpolyper.y	PG90polyper.y	MIpolyper.y	Intpolyper.y	MIIpolyper.y	noPGAvg	PG90Avg	MIAvg	IntAvg	MIIAvg
BIRC5.1.L	0.43835	0.349141	0.286601	0.445041	0.350426	0.339631	0.326137	0.399468	0.527222	0.743724	0.388991	0.337639	0.343035	0.486131	0.547075
CCDC9.S	0.229542	0.186067	0.227044	0.462683	0.396031	0.30744	0.291673	0.265724	0.35503	0.487173	0.268491	0.23887	0.246384	0.408857	0.441602
CCNB1.2.L	0.256578	0.189768	0.275071	0.582394	0.516791	0.227039	0.235976	0.238796	0.331466	0.6853	0.241809	0.212872	0.256934	0.45693	0.601045
CCNB2.S	0.363766	0.247685	0.267252	0.558521	0.515753	0.275463	0.264071	0.313995	0.350079	0.629024	0.319615	0.255878	0.290623	0.4543	0.572389
CCNE1.S	0.320943	0.259408	0.32471	0.533787	0.452093	0.265418	0.261168	0.275311	0.314339	0.590374	0.29318	0.260288	0.30001	0.424063	0.521233
CDO1.L	0.322779	0.272013	0.32174	0.353014	0.300474	0.300765	0.293046	0.379397	0.417669	0.579172	0.311772	0.282529	0.350568	0.385342	0.439823
CTSB.S	0.380475	0.308904	0.403463	0.642944	0.572361	0.311538	0.275768	0.234698	0.298012	0.359919	0.346006	0.292336	0.319081	0.470478	0.46614
DRAP1.S	0.352481	0.280689	0.43471	0.466688	0.488106	0.335505	0.286649	0.354691	0.544694	0.68753	0.343993	0.283669	0.3947	0.505691	0.587818
EDF1.L	0.481386	0.414726	0.438782	0.584916	0.5137	0.490904	0.496671	0.599245	0.675118	0.686387	0.486145	0.455698	0.519013	0.630017	0.600043
EED.S	0.296711	0.200971	0.341062	0.539254	0.365075	0.258532	0.232414	0.242788	0.242025	0.384494	0.277622	0.216693	0.291925	0.39064	0.374785
FBXO43-LIKE.L	0.261195	0.205345	0.245847	0.575001	0.478258	0.257502	0.211228	0.265612	0.234748	0.464181	0.259349	0.208287	0.255729	0.404875	0.471219
FBXO43-LIKE.S	0.256064	0.254315	0.351421	0.627081	0.589205	0.342403	0.320635	0.350523	0.380299	0.434363	0.299234	0.287475	0.350972	0.50369	0.511784
GIPC2.L	0.283054	0.139532	0.339754	0.416644	0.404358	0.300747	0.371606	0.466669	0.534332	0.586641	0.291901	0.255569	0.403211	0.475488	0.495499
GJA7.L	0.235562	0.18329	0.372735	0.609974	0.530293	0.25967	0.268098	0.252569	0.291104	0.373543	0.247616	0.225694	0.312652	0.450539	0.451918
GLS.L	0.306056	0.191429	0.379889	0.485661	0.476557	0.329645	0.316209	0.42317	0.433303	0.595917	0.31785	0.253819	0.401529	0.459482	0.536237
IER5L.S	0.331294	0.130114	0.352691	0.540898	0.2679	0.294602	0.28237	0.267201	0.429877	0.571076	0.312948	0.206242	0.309946	0.485388	0.419488
IFT88.S	0.248206	0.186953	0.300185	0.426293	0.296645	0.256323	0.24555	0.312667	0.340485	0.486547	0.252265	0.216252	0.306426	0.383389	0.391596
LOC100497074.S	0.402062	0.223668	0.365903	0.377289	0.252763	0.323004	0.336212	0.392057	0.580375	0.577058	0.362533	0.27994	0.37898	0.478832	0.414911
LOC100498440-LIKE.L	0.455615	0.29754	0.381388	0.754307	0.704251	0.358436	0.364749	0.448294	0.612792	0.820819	0.407025	0.331145	0.414841	0.68355	0.762535
LOC733561.L	0.375824	0.301458	0.304584	0.449054	0.456363	0.33699	0.38802	0.481249	0.570385	0.70328	0.356407	0.344739	0.392916	0.509719	0.579821
LOC733728.L	0.365539	0.285001	0.452398	0.636091	0.601898	0.280167	0.302731	0.286669	0.387251	0.459412	0.322853	0.293866	0.369534	0.511671	0.530655
NCAPD2.S	0.264444	0.182532	0.27264	0.596325	0.523457	0.270568	0.282467	0.232646	0.312609	0.583789	0.267506	0.2325	0.252643	0.454467	0.553623
NCBP2.L	0.428818	0.289452	0.470483	0.405276	0.417658	0.382957	0.379111	0.399873	0.58099	0.659234	0.405888	0.334282	0.435178	0.493133	0.538446
ORC1.L	0.340411	0.230379	0.381207	0.726582	0.612368	0.338648	0.319783	0.452479	0.558612	0.543603	0.339529	0.275081	0.416843	0.642597	0.577986
PRPF31.S	0.450243	0.322508	0.378595	0.60113	0.514859	0.315339	0.240356	0.318374	0.445825	0.522097	0.382791	0.281432	0.348485	0.523478	0.518478
RRM2.2.S	0.34399	0.295243	0.39394	0.474018	0.395699	0.298423	0.279988	0.380601	0.397539	0.535457	0.321206	0.287616	0.387271	0.435778	0.465578
SIRT3.2.L	0.414584	0.260313	0.365808	0.607572	0.317114	0.284934	0.337644	0.402968	0.510668	0.602031	0.349759	0.298978	0.384388	0.55912	0.459573
SNRPB.L	0.391872	0.323522	0.38938	0.506518	0.482507	0.326748	0.320594	0.38428	0.532666	0.645259	0.35931	0.322058	0.38683	0.519592	0.563883
SNRPB.S	0.476007	0.361808	0.366298	0.541954	0.627177	0.344457	0.352469	0.490326	0.664764	0.71564	0.410232	0.357138	0.428312	0.603359	0.671409
STIL.L	0.252368	0.219385	0.300568	0.512741	0.487061	0.307672	0.30061	0.275574	0.321714	0.529297	0.28002	0.259997	0.288071	0.417227	0.508179
TBC1D8.L	0.199467	0.166517	0.225009	0.367851	0.288786	0.233621	0.2211	0.219574	0.314074	0.406232	0.216544	0.193809	0.222291	0.340962	0.347509
TMEM171.L	0.434616	0.433836	0.605061	0.687238	0.637835	0.33797	0.332733	0.328087	0.448285	0.422716	0.386293	0.383284	0.466574	0.567762	0.530275
UQCRFS1.S	0.355265	0.318427	0.229636	0.547578	0.363957	0.299162	0.271732	0.395723	0.424919	0.557638	0.327213	0.29508	0.31268	0.486248	0.460798
XELAEV18001082M	0.610285	0.458261	0.601875	0.722005	0.671607	0.3358	0.361818	0.405567	0.459835	0.379021	0.473042	0.41004	0.503721	0.59092	0.525314
XELAEV18001350M	0.224132	0.188373	0.384466	0.676071	0.544868	0.253637	0.241698	0.288587	0.345686	0.562478	0.238885	0.215036	0.336527	0.510878	0.553673
XELAEV18001362M	0.343157	0.289224	0.245932	0.550487	0.352388	0.311474	0.333746	0.374221	0.370329	0.486573	0.327316	0.311485	0.310076	0.460408	0.419481
XELAEV18001535M	0.386189	0.429474	0.350584	0.549116	0.574479	0.334869	0.30258	0.358778	0.429152	0.553712	0.360529	0.366027	0.354681	0.489134	0.564095
XELAEV18002144M	0.332629	0.275822	0.348189	0.442487	0.374252	0.310256	0.300365	0.335231	0.368557	0.555778	0.321443	0.288093	0.34171	0.405522	0.465015
XELAEV18002463M	0.305927	0.298919	0.321884	0.493141	0.498173	0.269069	0.243947	0.245692	0.313333	0.54613	0.287498	0.271433	0.283788	0.403237	0.522151
XELAEV18008213M	0.350755	0.31197	0.288932	0.470576	0.357515	0.27203	0.27828	0.310764	0.408871	0.744776	0.311393	0.295125	0.299848	0.439724	0.551146
XELAEV18010151M	0.428772	0.391723	0.39995	0.516396	0.432096	0.360637	0.313204	0.375405	0.521371	0.624953	0.394705	0.352463	0.387678	0.518884	0.528525
XELAEV18010901M	0.533557	0.385114	0.562331	0.582342	0.664394	0.302142	0.289203	0.211399	0.436228	0.364164	0.417849	0.337159	0.386865	0.509285	0.514279
XELAEV18010928M	0.362752	0.257107	0.309493	0.623075	0.526245	0.28303	0.272364	0.302929	0.411981	0.762364	0.322891	0.264735	0.306211	0.517528	0.644305
XELAEV18012683M	0.529885	0.208546	0.33916	0.560288	0.301444	0.282741	0.338075	0.421465	0.473198	0.594917	0.406313	0.27331	0.380313	0.516743	0.448181
XELAEV18015309M	0.449505	0.250331	0.264551	0.389212	0.286442	0.31454	0.257182	0.417363	0.520982	0.613476	0.382023	0.253756	0.340957	0.455097	0.449959
XELAEV18016186M	0.346348	0.317577	0.352225	0.518048	0.462626	0.316139	0.323056	0.34969	0.374689	0.543524	0.331243	0.320317	0.350957	0.446368	0.503075
XELAEV18018944M	0.455875	0.338914	0.414929	0.407359	0.425667	0.292506	0.275418	0.378358	0.499885	0.638093	0.37419	0.307166	0.396643	0.453622	0.53188
XELAEV18020100M	0.427692	0.382374	0.31452	0.397193	0.320868	0.322548	0.27713	0.465153	0.495381	0.660781	0.37512	0.329752	0.389836	0.446287	0.490824
XELAEV18023037M	0.293178	0.224273	0.285388	0.577273	0.420843	0.259035	0.237955	0.271982	0.339531	0.575043	0.276106	0.231114	0.278685	0.458402	0.497943
XELAEV18029439M	0.278806	0.234511	0.345364	0.453297	0.342792	0.334089	0.302804	0.271145	0.379389	0.586791	0.306448	0.268657	0.308254	0.416343	0.464792
XELAEV18041850M	0.393273	0.366998	0.332877	0.484626	0.30223	0.33078	0.310807	0.470293	0.540272	0.610365	0.362026	0.338902	0.401585	0.512449	0.456297
XETROV90011857M.S	0.276412	0.215168	0.419762	0.498341	0.366095	0.314341	0.301969	0.284565	0.389587	0.496373	0.295377	0.258569	0.352163	0.443964	0.431234
XETROV90012198M.L	0.258973	0.217673	0.283192	0.471321	0.482616	0.255671	0.249339	0.23986	0.354537	0.538987	0.257322	0.233506	0.261526	0.412929	0.510801
XETROV90017899M.L	0.364455	0.280295	0.385766	0.494609	0.335077	0.304048	0.285019	0.414594	0.478173	0.582699	0.334251	0.282657	0.40018	0.486391	0.458888
ZFAND2A.L	0.210337	0.161265	0.298194	0.64356	0.495978	0.240441	0.285404	0.260745	0.351107	0.627825	0.225389	0.223334	0.27947	0.497334	0.561902
ZFAND5.S	0.403237	0.338782	0.607353	0.82881	0.685112	0.332343	0.328373	0.462682	0.597946	0.701479	0.36779	0.333577	0.535017	0.713378	0.693296
ZMAT5.L	0.37199	0.229867	0.407599	0.526266	0.396895	0.370388	0.375355	0.419555	0.484473	0.564716	0.371189	0.302611	0.413577	0.505369	0.480806

## Sheet: Cell Cycle
Human Uniprot Accession	Gene Desription
Q8WYP5	AT-hook containing transcription factor 1(AHCTF1)
P49917	DNA ligase 4(LIG4)
P51948	MNAT1, CDK activating kinase assembly factor(MNAT1)
Q9HBM1	SPC25, NDC80 kinetochore complex component(SPC25)
Q9ULW0	TPX2, microtubule nucleation factor(TPX2)
Q9NQW6	anillin actin binding protein(ANLN)
O60508	cell division cycle 40(CDC40)
Q53HL2	cell division cycle associated 8(CDCA8)
Q53EZ4	centrosomal protein 55(CEP55)
Q96MT8	centrosomal protein 63(CEP63)
Q7LBR1	charged multivesicular body protein 1B(CHMP1B)
Q9HAW4	claspin(CLSPN)
P14635	cyclin B1(CCNB1)
Q9Y421	family with sequence similarity 32 member A(FAM32A)
Q9BSJ6	family with sequence similarity 64 member A(FAM64A)
O75496	geminin, DNA replication inhibitor(GMNN)
Q9NRZ9	helicase, lymphoid-specific(HELLS)
Q9NQS7	inner centromere protein(INCENP)
Q99661	kinesin family member 2C(KIF2C)
Q8NG31	kinetochore scaffold 1(KNL1)
Q8WV92	microtubule interacting and trafficking domain containing 1(MITD1)
P53350	polo like kinase 1(PLK1)
Q9H4B4	polo like kinase 3(PLK3)
Q9H4X1	regulator of cell cycle(RGCC)
Q5UIP0	replication timing regulatory factor 1(RIF1)
Q9P0V9	septin 10(SEPT10)
Q5FBB7	shugoshin 1(SGO1)
Q8N0Z3	spindle and centriole associated protein 1(SPICE1)
Q96EA4	spindle apparatus coiled-coil protein 1(SPDL1)
Q9UQE7	structural maintenance of chromosomes 3(SMC3)
O00762	ubiquitin conjugating enzyme E2 C(UBE2C)
Q99986	vaccinia related kinase 1(VRK1)
O75351	vacuolar protein sorting 4 homolog B(VPS4B)
