# Supplementary material
Source: HighWire-hosted journal article supplement (doi:10.1101/rna.073247.119)
Supplement: Supplemental_Tables_Legends.docx [file Supplemental_Tables_Legends.docx]

**Supplemental Table S1. Poly-A tail measurements for all transcripts with at least 50 reads.**

**Supplemental Table S2. Raw Tail-seq data from two biological replicates.**

**Supplemental Table S3. Gene list and Gene Ontology results for polyadenylated transcripts.**

**Supplemental Table S4. Gene list and Gene Ontology results for deadenylated transcripts.**

**Supplemental Table S5. Gene list and Gene Ontology results for degraded transcripts.**

**Supplemental Table S6. Polysome fraction of each transcript.**

**Supplemental Table S7. Gene List and Gene Ontology results for transcripts with decreased polysome association.**

**Supplemental Table S8. Gene List and Gene Ontology results for transcripts with a rapid increase in polysome association.**

**Supplemental Table S9. Gene List and Gene Ontology results for transcripts with a slow increase in polysome association.**

**Supplemental Table S10. Combined poly-A and polysome percentage measurements.**

**Supplemental Table S11. PAS site calls from PAS-Seq.**

**Supplemental Table S12. Hexamer enrichment from polyadenylated transcripts.**

**Supplemental Table S13. Hexamer enrichment from deadenylated transcripts.**

**Supplemental Table S14. Hexamer enrichment from translationally activated transcripts.**

**Supplemental Table S15. Hexamer enrichment from translationally repressed transcripts.**
